# Supplementary material for: Rocks of different mineralogy show different temperature characteristics: implications for biodiversity on rocky seashores
Source: PeerJ. 2021 Jan 26;9:e10712. doi: 10.7717/peerj.10712 (PMC7845524; doi:10.7717/peerj.10712)
Supplement: Supplemental Information 2 [file peerj-09-10712-s002.xlsx]

## Sheet: Physical attributes
Rock type	Tag number	Surface	Thickness category	Actual thickness (cm)	Surface area (cm²)	Rugosity	Microhabitats >13 mm	Colour code	Descriptive colour	Site sourced	Mohs scratch hardness	Tag adhesive
Purple siltstone	1	Upper	Intermediate	11.2	384	0.92	0	2.5YR 5/1	Reddish grey	Marino Rocks	8	Tarzans grip
Purple siltstone	1	Lower	Intermediate	11.2	408	0.94	0	2.5YR 5/1	Reddish grey	Marino Rocks	8	Tarzans grip
Purple siltstone	1	Sides	Intermediate	11.2	332	-	0	2.5YR 5/1	Reddish grey	Marino Rocks	8	Tarzans grip
Purple siltstone	2	Upper	Thick	14.3	484	0.97	0	7.5YR 5/1	Brownish grey	Marino Rocks	8	Tarzans grip
Purple siltstone	2	Lower	Thick	14.3	456	0.94	0	7.5YR 5/1	Brownish grey	Marino Rocks	8	Tarzans grip
Purple siltstone	2	Sides	Thick	14.3	880	-	0	7.5YR 5/1	Brownish grey	Marino Rocks	8	Tarzans grip
Purple siltstone	3	Upper	Intermediate	11.6	424	0.91	0	10R 5/1	Reddish grey	Marino Rocks	8	Tarzans grip
Purple siltstone	3	Lower	Intermediate	11.6	354	0.91	0	10R 5/1	Reddish grey	Marino Rocks	8	Tarzans grip
Purple siltstone	3	Sides	Intermediate	11.6	336	-	0	10R 5/1	Reddish grey	Marino Rocks	8	Tarzans grip
Purple siltstone	4	Upper	Thin	6.4	608	0.94	0	10R 6/1	Reddish grey	Marino Rocks	8	Tarzans grip
Purple siltstone	4	Lower	Thin	6.4	608	0.95	0	10R 6/1	Reddish grey	Marino Rocks	8	Tarzans grip
Purple siltstone	5	Upper	Thin	6.5	508	0.92	0	10R 6/1	Reddish grey	Marino Rocks	8	Tarzans grip
Purple siltstone	5	Lower	Thin	6.5	496	0.97	0	10R 6/1	Reddish grey	Marino Rocks	8	Tarzans grip
Purple siltstone	6	Upper	Thick	13.5	596	0.94	0	7.5R 5/1	Reddish grey	Marino Rocks	8	Tarzans grip
Purple siltstone	6	Lower	Thick	13.5	516	1	0	7.5R 5/1	Reddish grey	Marino Rocks	8	Tarzans grip
Purple siltstone	6	Sides	Thick	13.5	424	-	0	7.5R 5/1	Reddish grey	Marino Rocks	8	Tarzans grip
Grey siltstone	7	Upper	Thick	12.3	436	0.94	0	N 7/0	Greyish white	Marino Rocks	8	Tarzans grip
Grey siltstone	7	Lower	Thick	12.3	544	0.95	0	N 7/0	Greyish white	Marino Rocks	8	Tarzans grip
Grey siltstone	7	Sides	Thick	12.3	564	-	0	N 7/0	Greyish white	Marino Rocks	8	Tarzans grip
Grey siltstone	8	Upper	Intermediate	8.1	592	0.97	0	2.5GY 6/1	Olive grey	Marino Rocks	8	Tarzans grip
Grey siltstone	8	Lower	Intermediate	8.1	584	0.97	0	2.5GY 6/1	Olive grey	Marino Rocks	8	Tarzans grip
Grey siltstone	8	Sides	Intermediate	8.1	292	-	0	2.5GY 6/1	Olive grey	Marino Rocks	8	Tarzans grip
Grey siltstone	9	Upper	Thick	12.6	624	0.92	0	2.5GY 7/1	Light olive grey	Marino Rocks	8	Tarzans grip
Grey siltstone	9	Lower	Thick	12.6	532	0.97	0	2.5GY 7/1	Light olive grey	Marino Rocks	8	Tarzans grip
Grey siltstone	9	Sides	Thick	12.6	724	-	0	2.5GY 7/1	Light olive grey	Marino Rocks	8	Tarzans grip
Grey siltstone	10	Upper	Intermediate	8.4	552	0.94	0	2.5GY 7/1	Light olive grey	Marino Rocks	8	Tarzans grip
Grey siltstone	10	Lower	Intermediate	8.4	556	0.94	0	2.5GY 7/1	Light olive grey	Marino Rocks	8	Tarzans grip
Grey siltstone	10	Sides	Intermediate	8.4	52	-	0	2.5GY 7/1	Light olive grey	Marino Rocks	8	Tarzans grip
Grey siltstone	11	Upper	Thin	7.3	688	0.94	0	N 7/0	Greyish white	Marino Rocks	8	Tarzans grip
Grey siltstone	11	Lower	Thin	7.3	696	0.92	0	N 7/0	Greyish white	Marino Rocks	8	Tarzans grip
Grey siltstone	12	Upper	Thin	7.5	580	0.95	0	N 6/0	Grey	Marino Rocks	8	Tarzans grip
Grey siltstone	12	Lower	Thin	7.5	576	0.94	0	N 6/0	Grey	Marino Rocks	8	Tarzans grip
Grey siltstone	12	Sides	Thin	7.5	148	-	0	N 6/0	Grey	Marino Rocks	8	Tarzans grip
White fossiliferous limestone	13	Upper	Intermediate	9.4	592	0.91	2	2.5Y 8/1	Light grey	Southport	4	Liquid nails
White fossiliferous limestone	13	Lower	Intermediate	9.4	492	0.91	2	2.5Y 8/1	Light grey	Southport	4	Liquid nails
White fossiliferous limestone	13	Sides	Intermediate	9.4	192	-	2	2.5Y 8/1	Light grey	Southport	4	Liquid nails
White fossiliferous limestone	14	Upper	Thin	6.5	830	0.97	4	2.5Y 8/1	Light grey	Southport	4	Liquid nails
White fossiliferous limestone	14	Lower	Thin	6.5	816	0.95	2	2.5Y 8/1	Light grey	Southport	4	Liquid nails
White fossiliferous limestone	15	Upper	Thin	5.9	612	0.82	1	2.5Y 8/1	Light grey	Southport	4	Super glue
White fossiliferous limestone	15	Lower	Thin	5.9	564	0.92	2	2.5Y 8/1	Light grey	Southport	4	Super glue
White fossiliferous limestone	15	Sides	Thin	5.9	156	-	0	2.5Y 8/1	Light grey	Southport	4	Super glue
White fossiliferous limestone	16	Upper	Thick	12.3	460	0.94	1	2.5Y 8/1	Light grey	Southport	4	Super glue
White fossiliferous limestone	16	Lower	Thick	12.3	412	0.94	0	2.5Y 8/1	Light grey	Southport	4	Super glue
White fossiliferous limestone	16	Sides	Thick	12.3	508	-	1	2.5Y 8/1	Light grey	Southport	4	Super glue
White fossiliferous limestone	17	Upper	Intermediate	9.5	444	0.95	0	2.5Y 8/1	Light grey	Southport	4	Tape
White fossiliferous limestone	17	Lower	Intermediate	9.5	448	0.92	1	2.5Y 8/1	Light grey	Southport	4	Tape
White fossiliferous limestone	17	Sides	Intermediate	9.5	356	-	1	2.5Y 8/1	Light grey	Southport	4	Tape
White fossiliferous limestone	18	Upper	Thick	12	544	0.85	1	2.5Y 8/1	Light grey	Southport	4	Tape
White fossiliferous limestone	18	Lower	Thick	12	504	0.81	0	2.5Y 8/1	Light grey	Southport	4	Tape
White fossiliferous limestone	18	Sides	Thick	12	356	-	0	2.5Y 8/1	Light grey	Southport	4	Tape
Orange fossiliferous limestone	19	Upper	Intermediate	6.8	604	0.94	0	2.5Y 6/4	Dull yellow	Southport	4	Liquid nails
Orange fossiliferous limestone	19	Lower	Intermediate	6.8	528	0.92	0	2.5Y 6/4	Dull yellow	Southport	4	Liquid nails
Orange fossiliferous limestone	19	Sides	Intermediate	6.8	96	-	0	2.5Y 6/4	Dull yellow	Southport	4	Liquid nails
Orange fossiliferous limestone	20	Upper	Thick	11.7	356	0.92	0	10YR 8/3	Light yellow	Southport	4	Liquid nails
Orange fossiliferous limestone	20	Lower	Thick	11.7	420	0.97	0	10YR 8/3	Light yellow	Southport	4	Liquid nails
Orange fossiliferous limestone	20	Sides	Thick	11.7	532	-	0	10YR 8/3	Light yellow	Southport	4	Liquid nails
Orange fossiliferous limestone	21	Upper	Thick	12.4	676	0.88	1	2.5Y 8/4	Pale yellow	Southport	4	Super glue
Orange fossiliferous limestone	21	Lower	Thick	12.4	608	0.91	0	2.5Y 8/4	Pale yellow	Southport	4	Super glue
Orange fossiliferous limestone	21	Sides	Thick	12.4	280	-	1	2.5Y 8/4	Pale yellow	Southport	4	Super glue
Orange fossiliferous limestone	22	Upper	Intermediate	7.6	632	0.94	0	2.5Y 7/4	Light yellow	Southport	4	Super glue
Orange fossiliferous limestone	22	Lower	Intermediate	7.6	584	0.94	0	2.5Y 7/4	Light yellow	Southport	4	Super glue
Orange fossiliferous limestone	22	Sides	Intermediate	7.6	220	-	0	2.5Y 7/4	Light yellow	Southport	4	Super glue
Orange fossiliferous limestone	23	Upper	Thin	6.1	808	0.91	0	5Y 8/3	Pale yellow	Southport	4	Tape
Orange fossiliferous limestone	23	Lower	Thin	6.1	792	0.94	0	5Y 8/3	Pale yellow	Southport	4	Tape
Orange fossiliferous limestone	23	Sides	Thin	6.1	152	-	0	5Y 8/3	Pale yellow	Southport	4	Tape
Orange fossiliferous limestone	24	Upper	Thin	6	620	0.94	0	2.5Y 7/4	Light yellow	Southport	4	Super glue
Orange fossiliferous limestone	24	Lower	Thin	6	588	0.94	1	2.5Y 7/4	Light yellow	Southport	4	Super glue
Orange fossiliferous limestone	24	Sides	Thin	6	164	-	0	2.5Y 7/4	Light yellow	Southport	4	Super glue
Quartzite	25	Upper	Thin	9.6	636	0.87	0	10YR 6/2	Greyish yellow brown	O'Sullivan Beach	9	Liquid nails
Quartzite	25	Lower	Thin	9.6	584	0.92	0	10YR 6/2	Greyish yellow brown	O'Sullivan Beach	9	Liquid nails
Quartzite	25	Sides	Thin	9.6	492	-	0	10YR 6/2	Greyish yellow brown	O'Sullivan Beach	9	Liquid nails
Quartzite	26	Upper	Thin	7.9	500	0.97	0	10YR 7/2	Greyish yellow brown	O'Sullivan Beach	9	Liquid nails
Quartzite	26	Lower	Thin	7.9	496	0.94	0	10YR 7/2	Greyish yellow brown	O'Sullivan Beach	9	Liquid nails
Quartzite	26	Sides	Thin	7.9	700	-	0	10YR 7/2	Greyish yellow brown	O'Sullivan Beach	9	Liquid nails
Quartzite	27	Upper	Intermediate	11.1	444	0.94	0	10YR 8/1	Light grey	O'Sullivan Beach	9	Super glue
Quartzite	27	Lower	Intermediate	11.1	448	0.94	0	10YR 8/1	Light grey	O'Sullivan Beach	9	Super glue
Quartzite	27	Sides	Intermediate	11.1	660	-	0	10YR 8/1	Light grey	O'Sullivan Beach	9	Super glue
Quartzite	28	Upper	Intermediate	12.6	328	0.95	0	10YR 8/1	Light grey	O'Sullivan Beach	9	Super glue
Quartzite	28	Lower	Intermediate	12.6	464	0.92	0	10YR 8/1	Light grey	O'Sullivan Beach	9	Super glue
Quartzite	28	Sides	Intermediate	12.6	952	-	0	10YR 8/1	Light grey	O'Sullivan Beach	9	Super glue
Quartzite	29	Upper	Thick	14.1	400	0.94	1	10YR 7/2	Greyish yellow brown	O'Sullivan Beach	9	Tape
Quartzite	29	Lower	Thick	14.1	368	0.94	0	10YR 7/2	Greyish yellow brown	O'Sullivan Beach	9	Tape
Quartzite	29	Sides	Thick	14.1	892	-	0	10YR 7/2	Greyish yellow brown	O'Sullivan Beach	9	Tape
Quartzite	30	Upper	Thick	14.3	376	0.96	0	10YR 8/1	Light grey	O'Sullivan Beach	9	Tape
Quartzite	30	Lower	Thick	14.3	588	0.9	0	10YR 8/1	Light grey	O'Sullivan Beach	9	Tape
Quartzite	30	Sides	Thick	14.3	768	-	0	10YR 8/1	Light grey	O'Sullivan Beach	9	Tape
Fossiliferous sandstone	31	Upper	Thin	6.9	588	0.94	0	2.5Y 7/6	Yellowish brown	Seaford	4	Liquid nails
Fossiliferous sandstone	31	Lower	Thin	6.9	580	0.94	0	2.5Y 7/6	Yellowish brown	Seaford	4	Liquid nails
Fossiliferous sandstone	31	Sides	Thin	6.9	132	-	0	2.5Y 7/6	Yellowish brown	Seaford	4	Liquid nails
Fossiliferous sandstone	32	Upper	Intermediate	7.9	524	0.92	0	2.5Y 7/4	Light yellow	Seaford	4	Liquid nails
Fossiliferous sandstone	32	Lower	Intermediate	7.9	536	0.91	0	2.5Y 7/4	Light yellow	Seaford	4	Liquid nails
Fossiliferous sandstone	32	Sides	Intermediate	7.9	260	-	0	2.5Y 7/4	Light yellow	Seaford	4	Liquid nails
Fossiliferous sandstone	33	Upper	Intermediate	8.6	672	0.85	0	2.5Y 6/4	Dull yellow	Seaford	4	Super glue
Fossiliferous sandstone	33	Lower	Intermediate	8.6	680	0.91	0	2.5Y 6/4	Dull yellow	Seaford	4	Super glue
Fossiliferous sandstone	33	Sides	Intermediate	8.6	116	-	0	2.5Y 6/4	Dull yellow	Seaford	4	Super glue
Fossiliferous sandstone	34	Upper	Thick	13.9	436	0.76	0	2.5Y 7/4	Light yellow	Seaford	4	Super glue
Fossiliferous sandstone	34	Lower	Thick	13.9	520	0.95	0	2.5Y 7/4	Light yellow	Seaford	4	Super glue
Fossiliferous sandstone	34	Sides	Thick	13.9	52	-	0	2.5Y 7/4	Light yellow	Seaford	4	Super glue
Fossiliferous sandstone	35	Upper	Thick	15	704	0.91	0	2.5Y 5/6	Yellowish brown	Seaford	4	Tape
Fossiliferous sandstone	35	Lower	Thick	15	664	0.91	1	2.5Y 5/6	Yellowish brown	Seaford	4	Tape
Fossiliferous sandstone	35	Sides	Thick	15	464	-	0	2.5Y 5/6	Yellowish brown	Seaford	4	Tape
Fossiliferous sandstone	36	Upper	Thin	7.5	732	0.86	0	2.5Y 7/4	Light yellow	Seaford	4	Tape
Fossiliferous sandstone	36	Lower	Thin	7.5	742	0.88	1	2.5Y 7/4	Light yellow	Seaford	4	Tape
Fossiliferous sandstone	36	Sides	Thin	7.5	128	-	0	2.5Y 7/4	Light yellow	Seaford	4	Tape

## Sheet: Hourly surface temperatures
Date	Temperature category	Analysis category	Air temperature	Day rank	Oktas (cloud cover)	Exposure time	Surface	Hardness	Rock type	Rock rank	Tag number	Thickness category	Actual thickness (cm)	Surface area	Rugosity	Microhabitats >13 mm	Colour code	Descriptive colour	Max temp	Min temp	Range	Target temp	Max - air	Min - air	Max -1hr	Min - 1hr	Range -1hr	Max change temp	Max change %	Min change temp	Min change %	Range change temp
September 9th	Cold	Cloudy	13	2	7	0	Upper	Hard	Purple siltstone	1	3	Intermediate	11.6	424	0.91	0	10R 5/1	Reddish grey	19.8	15.7	4.1	17.4	6.8	2.7
September 9th	Cold	Cloudy	13	2	7	0	Upper	Soft	Orange limestone	5	21	Thick	12.4	676	0.88	1	2.5Y 8/4	Pale yellow	19	14.7	4.3	15.9	6	1.7
September 9th	Cold	Cloudy	13	2	7	0	Upper	Hard	Quartzite	3	25	Thin	9.6	636	0.87	0	10YR 6/2	Greyish yellow brown	18.1	15.1	3	16	5.1	2.1
September 9th	Cold	Cloudy	13	2	7	0	Upper	Soft	Fossiliferous sandstone	4	33	Intermediate	8.6	672	0.85	0	2.5Y 6/4	Dull yellow	18.5	15.1	3.4	16.3	5.5	2.1
September 9th	Cold	Cloudy	13	2	7	0	Upper	Hard	Grey siltstone	2	12	Thin	7.5	580	0.95	0	N 6/0	Grey	19.1	16.4	2.7	17.3	6.1	3.4
September 9th	Cold	Cloudy	13	2	7	0	Upper	Soft	Orange limestone	5	20	Thick	11.7	356	0.92	0	10YR 8/3	Light yellow	18.9	14.6	4.3	16.8	5.9	1.6
September 9th	Cold	Cloudy	13	2	7	0	Upper	Hard	Quartzite	3	29	Thick	14.1	400	0.94	1	10YR 7/2	Greyish yellow brown	17.4	13.8	3.6	15.1	4.4	0.8
September 9th	Cold	Cloudy	13	2	7	0	Upper	Soft	White limestone	6	16	Thick	12.3	460	0.94	1	2.5Y 8/1	Light grey	19.1	14.1	5	16.2	6.1	1.1
September 9th	Cold	Cloudy	13	2	7	0	Upper	Hard	Grey siltstone	2	9	Thick	12.6	624	0.92	0	2.5GY 7/1	Light olive grey	18.8	14	4.8	16	5.8	1
September 9th	Cold	Cloudy	13	2	7	0	Upper	Hard	Quartzite	3	30	Thick	14.3	376	0.96	0	10YR 8/1	Light grey	15.9	13.5	2.4	14.5	2.9	0.5
September 9th	Cold	Cloudy	13	2	7	0	Upper	Hard	Purple siltstone	1	4	Thin	6.4	608	0.94	0	10R 6/1	Reddish grey	17.9	14.4	3.5	15.9	4.9	1.4
September 9th	Cold	Cloudy	13	2	7	0	Upper	Soft	Fossiliferous sandstone	4	36	Thin	7.5	732	0.86	0	2.5Y 7/4	Light yellow	18.4	14.1	4.3	15.7	5.4	1.1
September 9th	Cold	Cloudy	13	2	7	0	Upper	Soft	Fossiliferous sandstone	4	31	Thin	6.9	588	0.94	0	2.5Y 7/6	Yellowish brown	17.2	14.1	3.1	15.7	4.2	1.1
September 9th	Cold	Cloudy	13	2	7	0	Upper	Soft	White limestone	6	15	Thin	5.9	612	0.82	1	2.5Y 8/1	Light grey	17.7	14.5	3.2	15.9	4.7	1.5
September 9th	Cold	Cloudy	13	2	7	0	Upper	Soft	Orange limestone	5	22	Intermediate	7.6	632	0.94	0	2.5Y 7/4	Light yellow	17.6	13.9	3.7	15.3	4.6	0.9
September 9th	Cold	Cloudy	13	2	7	0	Upper	Hard	Grey siltstone	2	7	Thick	12.3	436	0.94	0	N 7/0	Greyish white	17.4	13.3	4.1	15.8	4.4	0.3
September 9th	Cold	Cloudy	13	2	7	0	Upper	Soft	Orange limestone	5	23	Thin	6.1	808	0.91	0	5Y 8/3	Pale yellow	17.1	12.9	4.2	15.2	4.1	-0.1
September 9th	Cold	Cloudy	13	2	7	0	Upper	Hard	Purple siltstone	1	2	Thick	14.3	484	0.97	0	7.5YR 5/1	Brownish grey	17.9	13.6	4.3	15.5	4.9	0.6
September 9th	Cold	Cloudy	13	2	7	0	Upper	Soft	White limestone	6	13	Intermediate	9.4	592	0.91	2	2.5Y 8/1	Light grey	17.7	14	3.7	15.6	4.7	1
September 9th	Cold	Cloudy	13	2	7	0	Upper	Hard	Grey siltstone	2	11	Thin	7.3	688	0.94	0	N 7/0	Greyish white	17.2	14.3	2.9	15.3	4.2	1.3
September 9th	Cold	Cloudy	13	2	7	0	Upper	Hard	Purple siltstone	1	1	Intermediate	11.2	384	0.92	0	2.5YR 5/1	Reddish grey	17.3	13.5	3.8	15.7	4.3	0.5
September 9th	Cold	Cloudy	13	2	7	0	Upper	Hard	Grey siltstone	2	10	Intermediate	8.4	552	0.94	0	2.5GY 7/1	Light olive grey	17.3	13.9	3.4	16.3	4.3	0.9
September 9th	Cold	Cloudy	13	2	7	0	Upper	Soft	Orange limestone	5	19	Intermediate	6.8	604	0.94	0	2.5Y 6/4	Dull yellow	16.8	13.7	3.1	14.6	3.8	0.7
September 9th	Cold	Cloudy	13	2	7	0	Upper	Soft	White limestone	6	14	Thin	6.5	830	0.97	4	2.5Y 8/1	Light grey	17.2	13.2	4	14.8	4.2	0.2
September 9th	Cold	Cloudy	13	2	7	0	Upper	Soft	Fossiliferous sandstone	4	35	Thick	15	704	0.91	0	2.5Y 5/6	Yellowish brown	17.2	13.3	3.9	14.6	4.2	0.3
September 9th	Cold	Cloudy	13	2	7	0	Upper	Hard	Purple siltstone	1	5	Thin	6.5	508	0.92	0	10R 6/1	Reddish grey	16.6	14.3	2.3	15.6	3.6	1.3
September 9th	Cold	Cloudy	13	2	7	0	Upper	Hard	Quartzite	3	28	Intermediate	12.6	328	0.95	0	10YR 8/1	Light grey	15.7	13.4	2.3	14.7	2.7	0.4
September 9th	Cold	Cloudy	13	2	7	0	Upper	Soft	Orange limestone	5	24	Thin	6	620	0.94	0	2.5Y 7/4	Light yellow	17.1	13.4	3.7	14.4	4.1	0.4
September 9th	Cold	Cloudy	13	2	7	0	Upper	Hard	Quartzite	3	27	Intermediate	11.1	444	0.94	0	10YR 8/1	Light grey	14.9	13.2	1.7	13.7	1.9	0.2
September 9th	Cold	Cloudy	13	2	7	0	Upper	Soft	White limestone	6	18	Thick	12	544	0.85	1	2.5Y 8/1	Light grey	16.9	13.4	3.5	14.7	3.9	0.4
September 9th	Cold	Cloudy	13	2	7	0	Upper	Soft	Fossiliferous sandstone	4	34	Thick	13.9	436	0.76	0	2.5Y 7/4	Light yellow	16.8	13.3	3.5	14.9	3.8	0.3
September 9th	Cold	Cloudy	13	2	7	0	Upper	Hard	Purple siltstone	1	6	Thick	13.5	596	0.94	0	7.5R 5/1	Reddish grey	16.9	13.7	3.2	15.5	3.9	0.7
September 9th	Cold	Cloudy	13	2	7	0	Upper	Hard	Quartzite	3	26	Thin	7.9	500	0.97	0	10YR 7/2	Greyish yellow brown	16.3	14.4	1.9	15.2	3.3	1.4
September 9th	Cold	Cloudy	13	2	7	0	Upper	Soft	White limestone	6	17	Intermediate	9.5	444	0.95	0	2.5Y 8/1	Light grey	16.7	13.4	3.3	14.9	3.7	0.4
September 9th	Cold	Cloudy	13	2	7	0	Upper	Hard	Grey siltstone	2	8	Intermediate	8.1	592	0.97	0	2.5GY 6/1	Olive grey	17.3	13.4	3.9	15.1	4.3	0.4
September 9th	Cold	Cloudy	13	2	7	0	Upper	Soft	Fossiliferous sandstone	4	32	Intermediate	7.9	524	0.92	0	2.5Y 7/4	Light yellow	16.5	13.5	3	14.7	3.5	0.5
September 9th	Cold	Cloudy	13	2	7	0	Lower	Hard	Purple siltstone	1	3	Intermediate	11.6	354	0.91	0	10R 5/1	Reddish grey	16.1	12.7	3.4	13.3	3.1	-0.3
September 9th	Cold	Cloudy	13	2	7	0	Lower	Soft	Orange limestone	5	21	Thick	12.4	608	0.91	0	2.5Y 8/4	Pale yellow	14.9	12.2	2.7	12.8	1.9	-0.8
September 9th	Cold	Cloudy	13	2	7	0	Lower	Hard	Quartzite	3	25	Thin	9.6	584	0.92	0	10YR 6/2	Greyish yellow brown	17.5	13.8	3.7	15.1	4.5	0.8
September 9th	Cold	Cloudy	13	2	7	0	Lower	Soft	Fossiliferous sandstone	4	33	Intermediate	8.6	680	0.91	0	2.5Y 6/4	Dull yellow	16.8	14.2	2.6	14.7	3.8	1.2
September 9th	Cold	Cloudy	13	2	7	0	Lower	Hard	Grey siltstone	2	12	Thin	7.5	576	0.94	0	N 6/0	Grey	18.7	15.7	3	16.1	5.7	2.7
September 9th	Cold	Cloudy	13	2	7	0	Lower	Soft	Orange limestone	5	20	Thick	11.7	420	0.97	0	10YR 8/3	Light yellow	16.1	13.6	2.5	14.3	3.1	0.6
September 9th	Cold	Cloudy	13	2	7	0	Lower	Hard	Quartzite	3	29	Thick	14.1	368	0.94	0	10YR 7/2	Greyish yellow brown	16.1	14.2	1.9	15.4	3.1	1.2
September 9th	Cold	Cloudy	13	2	7	0	Lower	Soft	White limestone	6	16	Thick	12.3	412	0.94	0	2.5Y 8/1	Light grey	16.5	14.2	2.3	14.8	3.5	1.2
September 9th	Cold	Cloudy	13	2	7	0	Lower	Hard	Grey siltstone	2	9	Thick	12.6	532	0.97	0	2.5GY 7/1	Light olive grey	16.1	14.2	1.9	15	3.1	1.2
September 9th	Cold	Cloudy	13	2	7	0	Lower	Hard	Quartzite	3	30	Thick	14.3	588	0.9	0	10YR 8/1	Light grey	16.4	13.8	2.6	14.7	3.4	0.8
September 9th	Cold	Cloudy	13	2	7	0	Lower	Hard	Purple siltstone	1	4	Thin	6.4	608	0.95	0	10R 6/1	Reddish grey	18.5	15.3	3.2	16.1	5.5	2.3
September 9th	Cold	Cloudy	13	2	7	0	Lower	Soft	Fossiliferous sandstone	4	36	Thin	7.5	742	0.88	1	2.5Y 7/4	Light yellow	17.9	15.1	2.8	16.1	4.9	2.1
September 9th	Cold	Cloudy	13	2	7	0	Lower	Soft	Fossiliferous sandstone	4	31	Thin	6.9	580	0.94	0	2.5Y 7/6	Yellowish brown	16.6	14.5	2.1	15.4	3.6	1.5
September 9th	Cold	Cloudy	13	2	7	0	Lower	Soft	White limestone	6	15	Thin	5.9	564	0.92	2	2.5Y 8/1	Light grey	18.6	15.1	3.5	15.9	5.6	2.1
September 9th	Cold	Cloudy	13	2	7	0	Lower	Soft	Orange limestone	5	22	Intermediate	7.6	584	0.94	0	2.5Y 7/4	Light yellow	16.9	14.6	2.3	15.2	3.9	1.6
September 9th	Cold	Cloudy	13	2	7	0	Lower	Hard	Grey siltstone	2	7	Thick	12.3	544	0.95	0	N 7/0	Greyish white	16.6	14.8	1.8	15.3	3.6	1.8
September 9th	Cold	Cloudy	13	2	7	0	Lower	Soft	Orange limestone	5	23	Thin	6.1	792	0.94	0	5Y 8/3	Pale yellow	17.3	14.7	2.6	15.3	4.3	1.7
September 9th	Cold	Cloudy	13	2	7	0	Lower	Hard	Purple siltstone	1	2	Thick	14.3	456	0.94	0	7.5YR 5/1	Brownish grey	16.8	14.8	2	15.6	3.8	1.8
September 9th	Cold	Cloudy	13	2	7	0	Lower	Soft	White limestone	6	13	Intermediate	9.4	492	0.91	2	2.5Y 8/1	Light grey	18.4	14.9	3.5	16.7	5.4	1.9
September 9th	Cold	Cloudy	13	2	7	0	Lower	Hard	Grey siltstone	2	11	Thin	7.3	696	0.92	0	N 7/0	Greyish white	18.7	15.4	3.3	16.2	5.7	2.4
September 9th	Cold	Cloudy	13	2	7	0	Lower	Hard	Purple siltstone	1	1	Intermediate	11.2	408	0.94	0	2.5YR 5/1	Reddish grey	18.9	15.5	3.4	16.1	5.9	2.5
September 9th	Cold	Cloudy	13	2	7	0	Lower	Hard	Grey siltstone	2	10	Intermediate	8.4	556	0.94	0	2.5GY 7/1	Light olive grey	18.3	15.9	2.4	16.3	5.3	2.9
September 9th	Cold	Cloudy	13	2	7	0	Lower	Soft	Orange limestone	5	19	Intermediate	6.8	528	0.92	0	2.5Y 6/4	Dull yellow	17.5	14.7	2.8	15.3	4.5	1.7
September 9th	Cold	Cloudy	13	2	7	0	Lower	Soft	White limestone	6	14	Thin	6.5	816	0.95	2	2.5Y 8/1	Light grey	18.1	14.6	3.5	15.1	5.1	1.6
September 9th	Cold	Cloudy	13	2	7	0	Lower	Soft	Fossiliferous sandstone	4	35	Thick	15	664	0.91	1	2.5Y 5/6	Yellowish brown	16.3	14.3	2	15.5	3.3	1.3
September 9th	Cold	Cloudy	13	2	7	0	Lower	Hard	Purple siltstone	1	5	Thin	6.5	496	0.97	0	10R 6/1	Reddish grey	18	15.8	2.2	16.6	5	2.8
September 9th	Cold	Cloudy	13	2	7	0	Lower	Hard	Quartzite	3	28	Intermediate	12.6	464	0.92	0	10YR 8/1	Light grey	16.9	14.7	2.2	15.9	3.9	1.7
September 9th	Cold	Cloudy	13	2	7	0	Lower	Soft	Orange limestone	5	24	Thin	6	588	0.94	1	2.5Y 7/4	Light yellow	18.1	14.8	3.3	15.6	5.1	1.8
September 9th	Cold	Cloudy	13	2	7	0	Lower	Hard	Quartzite	3	27	Intermediate	11.1	448	0.94	0	10YR 8/1	Light grey	16.5	14.3	2.2	15.2	3.5	1.3
September 9th	Cold	Cloudy	13	2	7	0	Lower	Soft	White limestone	6	18	Thick	12	504	0.81	0	2.5Y 8/1	Light grey	16.8	14.4	2.4	14.9	3.8	1.4
September 9th	Cold	Cloudy	13	2	7	0	Lower	Soft	Fossiliferous sandstone	4	34	Thick	13.9	520	0.95	0	2.5Y 7/4	Light yellow	16.7	14.5	2.2	15.3	3.7	1.5
September 9th	Cold	Cloudy	13	2	7	0	Lower	Hard	Purple siltstone	1	6	Thick	13.5	516	1	0	7.5R 5/1	Reddish grey	17.3	14.8	2.5	16.3	4.3	1.8
September 9th	Cold	Cloudy	13	2	7	0	Lower	Hard	Quartzite	3	26	Thin	7.9	496	0.94	0	10YR 7/2	Greyish yellow brown	17.4	15.7	1.7	16.6	4.4	2.7
September 9th	Cold	Cloudy	13	2	7	0	Lower	Soft	White limestone	6	17	Intermediate	9.5	448	0.92	1	2.5Y 8/1	Light grey	16.7	15.1	1.6	15.9	3.7	2.1
September 9th	Cold	Cloudy	13	2	7	0	Lower	Hard	Grey siltstone	2	8	Intermediate	8.1	584	0.97	0	2.5GY 6/1	Olive grey	19.1	16.4	2.7	16.8	6.1	3.4
September 9th	Cold	Cloudy	13	2	7	0	Lower	Soft	Fossiliferous sandstone	4	32	Intermediate	7.9	536	0.91	0	2.5Y 7/4	Light yellow	18.3	14.9	3.4	16.1	5.3	1.9
September 9th	Cold	Cloudy	14	2	8	60	Upper	Hard	Purple siltstone	1	3	Intermediate	11.6	424	0.91	0	10R 5/1	Reddish grey	22	18.5	3.5	20.8	8	4.5	19.8	15.7	4.1	2.2	11.1111	2.8	17.8344	-0.6
September 9th	Cold	Cloudy	14	2	8	60	Upper	Soft	Orange limestone	5	21	Thick	12.4	676	0.88	1	2.5Y 8/4	Pale yellow	19.6	16	3.6	17.8	5.6	2	19	14.7	4.3	0.6	3.15789	1.3	8.84354	-0.7
September 9th	Cold	Cloudy	14	2	8	60	Upper	Hard	Quartzite	3	25	Thin	9.6	636	0.87	0	10YR 6/2	Greyish yellow brown	20	17	3	18	6	3	18.1	15.1	3	1.9	10.4972	1.9	12.5828	0
September 9th	Cold	Cloudy	14	2	8	60	Upper	Soft	Fossiliferous sandstone	4	33	Intermediate	8.6	672	0.85	0	2.5Y 6/4	Dull yellow	19.9	16.4	3.5	18.4	5.9	2.4	18.5	15.1	3.4	1.4	7.56757	1.3	8.60927	0.1
September 9th	Cold	Cloudy	14	2	8	60	Upper	Hard	Grey siltstone	2	12	Thin	7.5	580	0.95	0	N 6/0	Grey	21.6	18.9	2.7	19.8	7.6	4.9	19.1	16.4	2.7	2.5	13.089	2.5	15.2439	0
September 9th	Cold	Cloudy	14	2	8	60	Upper	Soft	Orange limestone	5	20	Thick	11.7	356	0.92	0	10YR 8/3	Light yellow	19.2	15	4.2	17.5	5.2	1	18.9	14.6	4.3	0.3	1.5873	0.4	2.73973	-0.1
September 9th	Cold	Cloudy	14	2	8	60	Upper	Hard	Quartzite	3	29	Thick	14.1	400	0.94	1	10YR 7/2	Greyish yellow brown	18.3	15	3.3	17.2	4.3	1	17.4	13.8	3.6	0.9	5.17241	1.2	8.69565	-0.3
September 9th	Cold	Cloudy	14	2	8	60	Upper	Soft	White limestone	6	16	Thick	12.3	460	0.94	1	2.5Y 8/1	Light grey	18.4	14.8	3.6	17	4.4	0.8	19.1	14.1	5	-0.7	-3.66492	0.7	4.96454	-1.4
September 9th	Cold	Cloudy	14	2	8	60	Upper	Hard	Grey siltstone	2	9	Thick	12.6	624	0.92	0	2.5GY 7/1	Light olive grey	20.7	16.2	4.5	18.4	6.7	2.2	18.8	14	4.8	1.9	10.1064	2.2	15.7143	-0.3
September 9th	Cold	Cloudy	14	2	8	60	Upper	Hard	Quartzite	3	30	Thick	14.3	376	0.96	0	10YR 8/1	Light grey	17.2	14.4	2.8	16	3.2	0.4	15.9	13.5	2.4	1.3	8.1761	0.9	6.66667	0.4
September 9th	Cold	Cloudy	14	2	8	60	Upper	Hard	Purple siltstone	1	4	Thin	6.4	608	0.94	0	10R 6/1	Reddish grey	19.5	16.6	2.9	18	5.5	2.6	17.9	14.4	3.5	1.6	8.93855	2.2	15.2778	-0.6
September 9th	Cold	Cloudy	14	2	8	60	Upper	Soft	Fossiliferous sandstone	4	36	Thin	7.5	732	0.86	0	2.5Y 7/4	Light yellow	18.5	14.7	3.8	16.8	4.5	0.7	18.4	14.1	4.3	0.1	0.543478	0.6	4.25532	-0.5
September 9th	Cold	Cloudy	14	2	8	60	Upper	Soft	Fossiliferous sandstone	4	31	Thin	6.9	588	0.94	0	2.5Y 7/6	Yellowish brown	18.9	14.5	4.4	17.1	4.9	0.5	17.2	14.1	3.1	1.7	9.88372	0.4	2.83688	1.3
September 9th	Cold	Cloudy	14	2	8	60	Upper	Soft	White limestone	6	15	Thin	5.9	612	0.82	1	2.5Y 8/1	Light grey	18.5	14.1	4.4	17.1	4.5	0.1	17.7	14.5	3.2	0.8	4.51977	-0.4	-2.75862	1.2
September 9th	Cold	Cloudy	14	2	8	60	Upper	Soft	Orange limestone	5	22	Intermediate	7.6	632	0.94	0	2.5Y 7/4	Light yellow	18.9	14.8	4.1	17.1	4.9	0.8	17.6	13.9	3.7	1.3	7.38636	0.9	6.47482	0.4
September 9th	Cold	Cloudy	14	2	8	60	Upper	Hard	Grey siltstone	2	7	Thick	12.3	436	0.94	0	N 7/0	Greyish white	19.4	15.3	4.1	18.3	5.4	1.3	17.4	13.3	4.1	2	11.4943	2	15.0376	0
September 9th	Cold	Cloudy	14	2	8	60	Upper	Soft	Orange limestone	5	23	Thin	6.1	808	0.91	0	5Y 8/3	Pale yellow	17.8	14.1	3.7	16.6	3.8	0.1	17.1	12.9	4.2	0.7	4.09357	1.2	9.30233	-0.5
September 9th	Cold	Cloudy	14	2	8	60	Upper	Hard	Purple siltstone	1	2	Thick	14.3	484	0.97	0	7.5YR 5/1	Brownish grey	19.9	15.8	4.1	18.2	5.9	1.8	17.9	13.6	4.3	2	11.1732	2.2	16.1765	-0.2
September 9th	Cold	Cloudy	14	2	8	60	Upper	Soft	White limestone	6	13	Intermediate	9.4	592	0.91	2	2.5Y 8/1	Light grey	17.6	13.8	3.8	16.5	3.6	-0.2	17.7	14	3.7	-0.1	-0.564972	-0.2	-1.42857	0.1
September 9th	Cold	Cloudy	14	2	8	60	Upper	Hard	Grey siltstone	2	11	Thin	7.3	688	0.94	0	N 7/0	Greyish white	19	15.9	3.1	18.1	5	1.9	17.2	14.3	2.9	1.8	10.4651	1.6	11.1888	0.2
September 9th	Cold	Cloudy	14	2	8	60	Upper	Hard	Purple siltstone	1	1	Intermediate	11.2	384	0.92	0	2.5YR 5/1	Reddish grey	20	17	3	19.1	6	3	17.3	13.5	3.8	2.7	15.6069	3.5	25.9259	-0.8
September 9th	Cold	Cloudy	14	2	8	60	Upper	Hard	Grey siltstone	2	10	Intermediate	8.4	552	0.94	0	2.5GY 7/1	Light olive grey	19.3	16	3.3	17.9	5.3	2	17.3	13.9	3.4	2	11.5607	2.1	15.1079	-0.1
September 9th	Cold	Cloudy	14	2	8	60	Upper	Soft	Orange limestone	5	19	Intermediate	6.8	604	0.94	0	2.5Y 6/4	Dull yellow	18.3	14.4	3.9	16.4	4.3	0.4	16.8	13.7	3.1	1.5	8.92857	0.7	5.10949	0.8
September 9th	Cold	Cloudy	14	2	8	60	Upper	Soft	White limestone	6	14	Thin	6.5	830	0.97	4	2.5Y 8/1	Light grey	17.9	13.5	4.4	15.8	3.9	-0.5	17.2	13.2	4	0.7	4.06977	0.3	2.27273	0.4
September 9th	Cold	Cloudy	14	2	8	60	Upper	Soft	Fossiliferous sandstone	4	35	Thick	15	704	0.91	0	2.5Y 5/6	Yellowish brown	18.3	14.3	4	16.1	4.3	0.3	17.2	13.3	3.9	1.1	6.39535	1	7.5188	0.1
September 9th	Cold	Cloudy	14	2	8	60	Upper	Hard	Purple siltstone	1	5	Thin	6.5	508	0.92	0	10R 6/1	Reddish grey	19.1	15.5	3.6	18	5.1	1.5	16.6	14.3	2.3	2.5	15.0602	1.2	8.39161	1.3
September 9th	Cold	Cloudy	14	2	8	60	Upper	Hard	Quartzite	3	28	Intermediate	12.6	328	0.95	0	10YR 8/1	Light grey	16.8	13.9	2.9	15	2.8	-0.1	15.7	13.4	2.3	1.1	7.00637	0.5	3.73134	0.6
September 9th	Cold	Cloudy	14	2	8	60	Upper	Soft	Orange limestone	5	24	Thin	6	620	0.94	0	2.5Y 7/4	Light yellow	17.9	14.1	3.8	15.4	3.9	0.1	17.1	13.4	3.7	0.8	4.67836	0.7	5.22388	0.1
September 9th	Cold	Cloudy	14	2	8	60	Upper	Hard	Quartzite	3	27	Intermediate	11.1	444	0.94	0	10YR 8/1	Light grey	16.2	14.4	1.8	15.2	2.2	0.4	14.9	13.2	1.7	1.3	8.72483	1.2	9.09091	0.1
September 9th	Cold	Cloudy	14	2	8	60	Upper	Soft	White limestone	6	18	Thick	12	544	0.85	1	2.5Y 8/1	Light grey	17.3	14	3.3	15.8	3.3	0	16.9	13.4	3.5	0.4	2.36686	0.6	4.47761	-0.2
September 9th	Cold	Cloudy	14	2	8	60	Upper	Soft	Fossiliferous sandstone	4	34	Thick	13.9	436	0.76	0	2.5Y 7/4	Light yellow	17.5	13.7	3.8	16.7	3.5	-0.3	16.8	13.3	3.5	0.7	4.16667	0.4	3.00752	0.3
September 9th	Cold	Cloudy	14	2	8	60	Upper	Hard	Purple siltstone	1	6	Thick	13.5	596	0.94	0	7.5R 5/1	Reddish grey	19.7	15.8	3.9	18.3	5.7	1.8	16.9	13.7	3.2	2.8	16.568	2.1	15.3285	0.7
September 9th	Cold	Cloudy	14	2	8	60	Upper	Hard	Quartzite	3	26	Thin	7.9	500	0.97	0	10YR 7/2	Greyish yellow brown	17.3	14.8	2.5	16	3.3	0.8	16.3	14.4	1.9	1	6.13497	0.4	2.77778	0.6
September 9th	Cold	Cloudy	14	2	8	60	Upper	Soft	White limestone	6	17	Intermediate	9.5	444	0.95	0	2.5Y 8/1	Light grey	17.8	13.6	4.2	15.7	3.8	-0.4	16.7	13.4	3.3	1.1	6.58683	0.2	1.49254	0.9
September 9th	Cold	Cloudy	14	2	8	60	Upper	Hard	Grey siltstone	2	8	Intermediate	8.1	592	0.97	0	2.5GY 6/1	Olive grey	19.1	15	4.1	17.8	5.1	1	17.3	13.4	3.9	1.8	10.4046	1.6	11.9403	0.2
September 9th	Cold	Cloudy	14	2	8	60	Upper	Soft	Fossiliferous sandstone	4	32	Intermediate	7.9	524	0.92	0	2.5Y 7/4	Light yellow	17.9	14.2	3.7	16.4	3.9	0.2	16.5	13.5	3	1.4	8.48485	0.7	5.18519	0.7
September 9th	Cold	Cloudy	14	2	8	60	Lower	Hard	Purple siltstone	1	3	Intermediate	11.6	354	0.91	0	10R 5/1	Reddish grey	18	14.9	3.1	16.7	4	0.9	16.1	12.7	3.4	1.9	11.8012	2.2	17.3228	-0.3
September 9th	Cold	Cloudy	14	2	8	60	Lower	Soft	Orange limestone	5	21	Thick	12.4	608	0.91	0	2.5Y 8/4	Pale yellow	15.8	13	2.8	14	1.8	-1	14.9	12.2	2.7	0.9	6.04027	0.8	6.55738	0.1
September 9th	Cold	Cloudy	14	2	8	60	Lower	Hard	Quartzite	3	25	Thin	9.6	584	0.92	0	10YR 6/2	Greyish yellow brown	18.5	15.1	3.4	16.4	4.5	1.1	17.5	13.8	3.7	1	5.71429	1.3	9.42029	-0.3
September 9th	Cold	Cloudy	14	2	8	60	Lower	Soft	Fossiliferous sandstone	4	33	Intermediate	8.6	680	0.91	0	2.5Y 6/4	Dull yellow	18.8	15.7	3.1	17.6	4.8	1.7	16.8	14.2	2.6	2	11.9048	1.5	10.5634	0.5
September 9th	Cold	Cloudy	14	2	8	60	Lower	Hard	Grey siltstone	2	12	Thin	7.5	576	0.94	0	N 6/0	Grey	20.8	18	2.8	18.4	6.8	4	18.7	15.7	3	2.1	11.2299	2.3	14.6497	-0.2
September 9th	Cold	Cloudy	14	2	8	60	Lower	Soft	Orange limestone	5	20	Thick	11.7	420	0.97	0	10YR 8/3	Light yellow	17.3	14.7	2.6	15.4	3.3	0.7	16.1	13.6	2.5	1.2	7.45342	1.1	8.08824	0.1
September 9th	Cold	Cloudy	14	2	8	60	Lower	Hard	Quartzite	3	29	Thick	14.1	368	0.94	0	10YR 7/2	Greyish yellow brown	17.9	15.9	2	16.8	3.9	1.9	16.1	14.2	1.9	1.8	11.1801	1.7	11.9718	0.1
September 9th	Cold	Cloudy	14	2	8	60	Lower	Soft	White limestone	6	16	Thick	12.3	412	0.94	0	2.5Y 8/1	Light grey	18.6	15.7	2.9	16.3	4.6	1.7	16.5	14.2	2.3	2.1	12.7273	1.5	10.5634	0.6
September 9th	Cold	Cloudy	14	2	8	60	Lower	Hard	Grey siltstone	2	9	Thick	12.6	532	0.97	0	2.5GY 7/1	Light olive grey	19.8	16.9	2.9	17.8	5.8	2.9	16.1	14.2	1.9	3.7	22.9814	2.7	19.0141	1
September 9th	Cold	Cloudy	14	2	8	60	Lower	Hard	Quartzite	3	30	Thick	14.3	588	0.9	0	10YR 8/1	Light grey	18.8	15.4	3.4	16.8	4.8	1.4	16.4	13.8	2.6	2.4	14.6341	1.6	11.5942	0.8
September 9th	Cold	Cloudy	14	2	8	60	Lower	Hard	Purple siltstone	1	4	Thin	6.4	608	0.95	0	10R 6/1	Reddish grey	20.9	18.1	2.8	19	6.9	4.1	18.5	15.3	3.2	2.4	12.973	2.8	18.3007	-0.4
September 9th	Cold	Cloudy	14	2	8	60	Lower	Soft	Fossiliferous sandstone	4	36	Thin	7.5	742	0.88	1	2.5Y 7/4	Light yellow	19.8	16.1	3.7	17.7	5.8	2.1	17.9	15.1	2.8	1.9	10.6145	1	6.62252	0.9
September 9th	Cold	Cloudy	14	2	8	60	Lower	Soft	Fossiliferous sandstone	4	31	Thin	6.9	580	0.94	0	2.5Y 7/6	Yellowish brown	18.5	15.8	2.7	16.7	4.5	1.8	16.6	14.5	2.1	1.9	11.4458	1.3	8.96552	0.6
September 9th	Cold	Cloudy	14	2	8	60	Lower	Soft	White limestone	6	15	Thin	5.9	564	0.92	2	2.5Y 8/1	Light grey	19	16.3	2.7	17	5	2.3	18.6	15.1	3.5	0.4	2.15054	1.2	7.94702	-0.8
September 9th	Cold	Cloudy	14	2	8	60	Lower	Soft	Orange limestone	5	22	Intermediate	7.6	584	0.94	0	2.5Y 7/4	Light yellow	18.9	16.1	2.8	16.9	4.9	2.1	16.9	14.6	2.3	2	11.8343	1.5	10.274	0.5
September 9th	Cold	Cloudy	14	2	8	60	Lower	Hard	Grey siltstone	2	7	Thick	12.3	544	0.95	0	N 7/0	Greyish white	19.4	17.3	2.1	18	5.4	3.3	16.6	14.8	1.8	2.8	16.8675	2.5	16.8919	0.3
September 9th	Cold	Cloudy	14	2	8	60	Lower	Soft	Orange limestone	5	23	Thin	6.1	792	0.94	0	5Y 8/3	Pale yellow	18.5	16	2.5	16.7	4.5	2	17.3	14.7	2.6	1.2	6.93642	1.3	8.84354	-0.1
September 9th	Cold	Cloudy	14	2	8	60	Lower	Hard	Purple siltstone	1	2	Thick	14.3	456	0.94	0	7.5YR 5/1	Brownish grey	19.5	16.6	2.9	17.7	5.5	2.6	16.8	14.8	2	2.7	16.0714	1.8	12.1622	0.9
September 9th	Cold	Cloudy	14	2	8	60	Lower	Soft	White limestone	6	13	Intermediate	9.4	492	0.91	2	2.5Y 8/1	Light grey	18.6	15.3	3.3	16.9	4.6	1.3	18.4	14.9	3.5	0.2	1.08696	0.4	2.68456	-0.2
September 9th	Cold	Cloudy	14	2	8	60	Lower	Hard	Grey siltstone	2	11	Thin	7.3	696	0.92	0	N 7/0	Greyish white	20	17.2	2.8	17.8	6	3.2	18.7	15.4	3.3	1.3	6.95187	1.8	11.6883	-0.5
September 9th	Cold	Cloudy	14	2	8	60	Lower	Hard	Purple siltstone	1	1	Intermediate	11.2	408	0.94	0	2.5YR 5/1	Reddish grey	21.3	17.7	3.6	18.6	7.3	3.7	18.9	15.5	3.4	2.4	12.6984	2.2	14.1935	0.2
September 9th	Cold	Cloudy	14	2	8	60	Lower	Hard	Grey siltstone	2	10	Intermediate	8.4	556	0.94	0	2.5GY 7/1	Light olive grey	20.2	17.8	2.4	18.6	6.2	3.8	18.3	15.9	2.4	1.9	10.3825	1.9	11.9497	0
September 9th	Cold	Cloudy	14	2	8	60	Lower	Soft	Orange limestone	5	19	Intermediate	6.8	528	0.92	0	2.5Y 6/4	Dull yellow	19.4	16.2	3.2	17	5.4	2.2	17.5	14.7	2.8	1.9	10.8571	1.5	10.2041	0.4
September 9th	Cold	Cloudy	14	2	8	60	Lower	Soft	White limestone	6	14	Thin	6.5	816	0.95	2	2.5Y 8/1	Light grey	18.8	15.9	2.9	16.5	4.8	1.9	18.1	14.6	3.5	0.7	3.8674	1.3	8.90411	-0.6
September 9th	Cold	Cloudy	14	2	8	60	Lower	Soft	Fossiliferous sandstone	4	35	Thick	15	664	0.91	1	2.5Y 5/6	Yellowish brown	18.8	15.3	3.5	16.8	4.8	1.3	16.3	14.3	2	2.5	15.3374	1	6.99301	1.5
September 9th	Cold	Cloudy	14	2	8	60	Lower	Hard	Purple siltstone	1	5	Thin	6.5	496	0.97	0	10R 6/1	Reddish grey	20.5	18.1	2.4	18.6	6.5	4.1	18	15.8	2.2	2.5	13.8889	2.3	14.557	0.2
September 9th	Cold	Cloudy	14	2	8	60	Lower	Hard	Quartzite	3	28	Intermediate	12.6	464	0.92	0	10YR 8/1	Light grey	18.8	16.4	2.4	17.2	4.8	2.4	16.9	14.7	2.2	1.9	11.2426	1.7	11.5646	0.2
September 9th	Cold	Cloudy	14	2	8	60	Lower	Soft	Orange limestone	5	24	Thin	6	588	0.94	1	2.5Y 7/4	Light yellow	18.8	15.7	3.1	17	4.8	1.7	18.1	14.8	3.3	0.7	3.8674	0.9	6.08108	-0.2
September 9th	Cold	Cloudy	14	2	8	60	Lower	Hard	Quartzite	3	27	Intermediate	11.1	448	0.94	0	10YR 8/1	Light grey	17.9	15.8	2.1	16.9	3.9	1.8	16.5	14.3	2.2	1.4	8.48485	1.5	10.4895	-0.1
September 9th	Cold	Cloudy	14	2	8	60	Lower	Soft	White limestone	6	18	Thick	12	504	0.81	0	2.5Y 8/1	Light grey	18.5	15.3	3.2	16.3	4.5	1.3	16.8	14.4	2.4	1.7	10.119	0.9	6.25	0.8
September 9th	Cold	Cloudy	14	2	8	60	Lower	Soft	Fossiliferous sandstone	4	34	Thick	13.9	520	0.95	0	2.5Y 7/4	Light yellow	18.3	15.7	2.6	16.7	4.3	1.7	16.7	14.5	2.2	1.6	9.58084	1.2	8.27586	0.4
September 9th	Cold	Cloudy	14	2	8	60	Lower	Hard	Purple siltstone	1	6	Thick	13.5	516	1	0	7.5R 5/1	Reddish grey	20.1	17.4	2.7	18.7	6.1	3.4	17.3	14.8	2.5	2.8	16.185	2.6	17.5676	0.2
September 9th	Cold	Cloudy	14	2	8	60	Lower	Hard	Quartzite	3	26	Thin	7.9	496	0.94	0	10YR 7/2	Greyish yellow brown	19.1	17.3	1.8	18.8	5.1	3.3	17.4	15.7	1.7	1.7	9.77011	1.6	10.1911	0.1
September 9th	Cold	Cloudy	14	2	8	60	Lower	Soft	White limestone	6	17	Intermediate	9.5	448	0.92	1	2.5Y 8/1	Light grey	18.2	15.9	2.3	17	4.2	1.9	16.7	15.1	1.6	1.5	8.98204	0.8	5.29801	0.7
September 9th	Cold	Cloudy	14	2	8	60	Lower	Hard	Grey siltstone	2	8	Intermediate	8.1	584	0.97	0	2.5GY 6/1	Olive grey	20.3	17.9	2.4	18.8	6.3	3.9	19.1	16.4	2.7	1.2	6.28272	1.5	9.14634	-0.3
September 9th	Cold	Cloudy	14	2	8	60	Lower	Soft	Fossiliferous sandstone	4	32	Intermediate	7.9	536	0.91	0	2.5Y 7/4	Light yellow	18.5	16.6	1.9	17.7	4.5	2.6	18.3	14.9	3.4	0.2	1.0929	1.7	11.4094	-1.5
September 9th	Cold	Cloudy	14	2	8	120	Upper	Hard	Purple siltstone	1	3	Intermediate	11.6	424	0.91	0	10R 5/1	Reddish grey	22.8	19.4	3.4	22.2	8.8	5.4	22	18.5	3.5	0.8	3.63636	0.9	4.86486	-0.1
September 9th	Cold	Cloudy	14	2	8	120	Upper	Soft	Orange limestone	5	21	Thick	12.4	676	0.88	1	2.5Y 8/4	Pale yellow	19.8	16.5	3.3	18.1	5.8	2.5	19.6	16	3.6	0.2	1.02041	0.5	3.125	-0.3
September 9th	Cold	Cloudy	14	2	8	120	Upper	Hard	Quartzite	3	25	Thin	9.6	636	0.87	0	10YR 6/2	Greyish yellow brown	20.8	17.9	2.9	19.3	6.8	3.9	20	17	3	0.8	4	0.9	5.29412	-0.1
September 9th	Cold	Cloudy	14	2	8	120	Upper	Soft	Fossiliferous sandstone	4	33	Intermediate	8.6	672	0.85	0	2.5Y 6/4	Dull yellow	19.8	17.2	2.6	19.4	5.8	3.2	19.9	16.4	3.5	-0.1	-0.502513	0.8	4.87805	-0.9
September 9th	Cold	Cloudy	14	2	8	120	Upper	Hard	Grey siltstone	2	12	Thin	7.5	580	0.95	0	N 6/0	Grey	22.4	19.3	3.1	21.3	8.4	5.3	21.6	18.9	2.7	0.8	3.7037	0.4	2.1164	0.4
September 9th	Cold	Cloudy	14	2	8	120	Upper	Soft	Orange limestone	5	20	Thick	11.7	356	0.92	0	10YR 8/3	Light yellow	19.4	16.1	3.3	18.2	5.4	2.1	19.2	15	4.2	0.2	1.04167	1.1	7.33333	-0.9
September 9th	Cold	Cloudy	14	2	8	120	Upper	Hard	Quartzite	3	29	Thick	14.1	400	0.94	1	10YR 7/2	Greyish yellow brown	19.2	16.3	2.9	18.3	5.2	2.3	18.3	15	3.3	0.9	4.91803	1.3	8.66667	-0.4
September 9th	Cold	Cloudy	14	2	8	120	Upper	Soft	White limestone	6	16	Thick	12.3	460	0.94	1	2.5Y 8/1	Light grey	18.7	15.7	3	17.9	4.7	1.7	18.4	14.8	3.6	0.3	1.63043	0.9	6.08108	-0.6
September 9th	Cold	Cloudy	14	2	8	120	Upper	Hard	Grey siltstone	2	9	Thick	12.6	624	0.92	0	2.5GY 7/1	Light olive grey	21.6	18.3	3.3	20	7.6	4.3	20.7	16.2	4.5	0.9	4.34783	2.1	12.963	-1.2
September 9th	Cold	Cloudy	14	2	8	120	Upper	Hard	Quartzite	3	30	Thick	14.3	376	0.96	0	10YR 8/1	Light grey	17.5	15.3	2.2	16.8	3.5	1.3	17.2	14.4	2.8	0.3	1.74419	0.9	6.25	-0.6
September 9th	Cold	Cloudy	14	2	8	120	Upper	Hard	Purple siltstone	1	4	Thin	6.4	608	0.94	0	10R 6/1	Reddish grey	20.1	17.5	2.6	18.6	6.1	3.5	19.5	16.6	2.9	0.6	3.07692	0.9	5.42169	-0.3
September 9th	Cold	Cloudy	14	2	8	120	Upper	Soft	Fossiliferous sandstone	4	36	Thin	7.5	732	0.86	0	2.5Y 7/4	Light yellow	19.3	15.2	4.1	17.4	5.3	1.2	18.5	14.7	3.8	0.8	4.32432	0.5	3.40136	0.3
September 9th	Cold	Cloudy	14	2	8	120	Upper	Soft	Fossiliferous sandstone	4	31	Thin	6.9	588	0.94	0	2.5Y 7/6	Yellowish brown	19.3	15.6	3.7	18	5.3	1.6	18.9	14.5	4.4	0.4	2.1164	1.1	7.58621	-0.7
September 9th	Cold	Cloudy	14	2	8	120	Upper	Soft	White limestone	6	15	Thin	5.9	612	0.82	1	2.5Y 8/1	Light grey	18.4	14.6	3.8	16.8	4.4	0.6	18.5	14.1	4.4	-0.1	-0.540541	0.5	3.5461	-0.6
September 9th	Cold	Cloudy	14	2	8	120	Upper	Soft	Orange limestone	5	22	Intermediate	7.6	632	0.94	0	2.5Y 7/4	Light yellow	19.2	15.2	4	18.3	5.2	1.2	18.9	14.8	4.1	0.3	1.5873	0.4	2.7027	-0.1
September 9th	Cold	Cloudy	14	2	8	120	Upper	Hard	Grey siltstone	2	7	Thick	12.3	436	0.94	0	N 7/0	Greyish white	19.6	17	2.6	18.9	5.6	3	19.4	15.3	4.1	0.2	1.03093	1.7	11.1111	-1.5
September 9th	Cold	Cloudy	14	2	8	120	Upper	Soft	Orange limestone	5	23	Thin	6.1	808	0.91	0	5Y 8/3	Pale yellow	17.9	14.5	3.4	16.8	3.9	0.5	17.8	14.1	3.7	0.1	0.561798	0.4	2.83688	-0.3
September 9th	Cold	Cloudy	14	2	8	120	Upper	Hard	Purple siltstone	1	2	Thick	14.3	484	0.97	0	7.5YR 5/1	Brownish grey	20.3	17.1	3.2	19.4	6.3	3.1	19.9	15.8	4.1	0.4	2.01005	1.3	8.22785	-0.9
September 9th	Cold	Cloudy	14	2	8	120	Upper	Soft	White limestone	6	13	Intermediate	9.4	592	0.91	2	2.5Y 8/1	Light grey	17.3	15.2	2.1	16.4	3.3	1.2	17.6	13.8	3.8	-0.3	-1.70455	1.4	10.1449	-1.7
September 9th	Cold	Cloudy	14	2	8	120	Upper	Hard	Grey siltstone	2	11	Thin	7.3	688	0.94	0	N 7/0	Greyish white	20	17.5	2.5	18.9	6	3.5	19	15.9	3.1	1	5.26316	1.6	10.0629	-0.6
September 9th	Cold	Cloudy	14	2	8	120	Upper	Hard	Purple siltstone	1	1	Intermediate	11.2	384	0.92	0	2.5YR 5/1	Reddish grey	20.7	17.6	3.1	19.9	6.7	3.6	20	17	3	0.7	3.5	0.6	3.52941	0.1
September 9th	Cold	Cloudy	14	2	8	120	Upper	Hard	Grey siltstone	2	10	Intermediate	8.4	552	0.94	0	2.5GY 7/1	Light olive grey	19.5	17.1	2.4	19	5.5	3.1	19.3	16	3.3	0.2	1.03627	1.1	6.875	-0.9
September 9th	Cold	Cloudy	14	2	8	120	Upper	Soft	Orange limestone	5	19	Intermediate	6.8	604	0.94	0	2.5Y 6/4	Dull yellow	18.6	14.9	3.7	17.5	4.6	0.9	18.3	14.4	3.9	0.3	1.63934	0.5	3.47222	-0.2
September 9th	Cold	Cloudy	14	2	8	120	Upper	Soft	White limestone	6	14	Thin	6.5	830	0.97	4	2.5Y 8/1	Light grey	17.9	14.7	3.2	17	3.9	0.7	17.9	13.5	4.4	0	0	1.2	8.88889	-1.2
September 9th	Cold	Cloudy	14	2	8	120	Upper	Soft	Fossiliferous sandstone	4	35	Thick	15	704	0.91	0	2.5Y 5/6	Yellowish brown	19.7	16.3	3.4	17.9	5.7	2.3	18.3	14.3	4	1.4	7.65027	2	13.986	-0.6
September 9th	Cold	Cloudy	14	2	8	120	Upper	Hard	Purple siltstone	1	5	Thin	6.5	508	0.92	0	10R 6/1	Reddish grey	19.8	17	2.8	19.3	5.8	3	19.1	15.5	3.6	0.7	3.66492	1.5	9.67742	-0.8
September 9th	Cold	Cloudy	14	2	8	120	Upper	Hard	Quartzite	3	28	Intermediate	12.6	328	0.95	0	10YR 8/1	Light grey	16.8	14.6	2.2	15.7	2.8	0.6	16.8	13.9	2.9	0	0	0.7	5.03597	-0.7
September 9th	Cold	Cloudy	14	2	8	120	Upper	Soft	Orange limestone	5	24	Thin	6	620	0.94	0	2.5Y 7/4	Light yellow	18.4	15.4	3	17	4.4	1.4	17.9	14.1	3.8	0.5	2.7933	1.3	9.21986	-0.8
September 9th	Cold	Cloudy	14	2	8	120	Upper	Hard	Quartzite	3	27	Intermediate	11.1	444	0.94	0	10YR 8/1	Light grey	17.3	15.3	2	16.1	3.3	1.3	16.2	14.4	1.8	1.1	6.79012	0.9	6.25	0.2
September 9th	Cold	Cloudy	14	2	8	120	Upper	Soft	White limestone	6	18	Thick	12	544	0.85	1	2.5Y 8/1	Light grey	17.8	15.8	2	16.6	3.8	1.8	17.3	14	3.3	0.5	2.89017	1.8	12.8571	-1.3
September 9th	Cold	Cloudy	14	2	8	120	Upper	Soft	Fossiliferous sandstone	4	34	Thick	13.9	436	0.76	0	2.5Y 7/4	Light yellow	18.9	15.8	3.1	18	4.9	1.8	17.5	13.7	3.8	1.4	8	2.1	15.3285	-0.7
September 9th	Cold	Cloudy	14	2	8	120	Upper	Hard	Purple siltstone	1	6	Thick	13.5	596	0.94	0	7.5R 5/1	Reddish grey	21.7	18.1	3.6	20.8	7.7	4.1	19.7	15.8	3.9	2	10.1523	2.3	14.557	-0.3
September 9th	Cold	Cloudy	14	2	8	120	Upper	Hard	Quartzite	3	26	Thin	7.9	500	0.97	0	10YR 7/2	Greyish yellow brown	18.8	16.2	2.6	17.6	4.8	2.2	17.3	14.8	2.5	1.5	8.67052	1.4	9.45946	0.1
September 9th	Cold	Cloudy	14	2	8	120	Upper	Soft	White limestone	6	17	Intermediate	9.5	444	0.95	0	2.5Y 8/1	Light grey	17.9	15.1	2.8	16.4	3.9	1.1	17.8	13.6	4.2	0.1	0.561798	1.5	11.0294	-1.4
September 9th	Cold	Cloudy	14	2	8	120	Upper	Hard	Grey siltstone	2	8	Intermediate	8.1	592	0.97	0	2.5GY 6/1	Olive grey	20.8	17.3	3.5	19.7	6.8	3.3	19.1	15	4.1	1.7	8.90052	2.3	15.3333	-0.6
September 9th	Cold	Cloudy	14	2	8	120	Upper	Soft	Fossiliferous sandstone	4	32	Intermediate	7.9	524	0.92	0	2.5Y 7/4	Light yellow	19	16	3	17.9	5	2	17.9	14.2	3.7	1.1	6.14525	1.8	12.6761	-0.7
September 9th	Cold	Cloudy	14	2	8	120	Lower	Hard	Purple siltstone	1	3	Intermediate	11.6	354	0.91	0	10R 5/1	Reddish grey	19.3	16.7	2.6	18	5.3	2.7	18	14.9	3.1	1.3	7.22222	1.8	12.0805	-0.5
September 9th	Cold	Cloudy	14	2	8	120	Lower	Soft	Orange limestone	5	21	Thick	12.4	608	0.91	0	2.5Y 8/4	Pale yellow	16.9	13.9	3	14.7	2.9	-0.1	15.8	13	2.8	1.1	6.96203	0.9	6.92308	0.2
September 9th	Cold	Cloudy	14	2	8	120	Lower	Hard	Quartzite	3	25	Thin	9.6	584	0.92	0	10YR 6/2	Greyish yellow brown	18.9	15.7	3.2	16.8	4.9	1.7	18.5	15.1	3.4	0.4	2.16216	0.6	3.97351	-0.2
September 9th	Cold	Cloudy	14	2	8	120	Lower	Soft	Fossiliferous sandstone	4	33	Intermediate	8.6	680	0.91	0	2.5Y 6/4	Dull yellow	17.8	15.3	2.5	16.8	3.8	1.3	18.8	15.7	3.1	-1	-5.31915	-0.4	-2.54777	-0.6
September 9th	Cold	Cloudy	14	2	8	120	Lower	Hard	Grey siltstone	2	12	Thin	7.5	576	0.94	0	N 6/0	Grey	21	18	3	19	7	4	20.8	18	2.8	0.2	0.961538	0	0	0.2
September 9th	Cold	Cloudy	14	2	8	120	Lower	Soft	Orange limestone	5	20	Thick	11.7	420	0.97	0	10YR 8/3	Light yellow	17.4	14.8	2.6	15.9	3.4	0.8	17.3	14.7	2.6	0.1	0.578035	0.1	0.680272	-3.55271e-15
September 9th	Cold	Cloudy	14	2	8	120	Lower	Hard	Quartzite	3	29	Thick	14.1	368	0.94	0	10YR 7/2	Greyish yellow brown	18.4	16.4	2	17	4.4	2.4	17.9	15.9	2	0.5	2.7933	0.5	3.14465	0
September 9th	Cold	Cloudy	14	2	8	120	Lower	Soft	White limestone	6	16	Thick	12.3	412	0.94	0	2.5Y 8/1	Light grey	17.8	15.4	2.4	16.2	3.8	1.4	18.6	15.7	2.9	-0.8	-4.30108	-0.3	-1.91083	-0.5
September 9th	Cold	Cloudy	14	2	8	120	Lower	Hard	Grey siltstone	2	9	Thick	12.6	532	0.97	0	2.5GY 7/1	Light olive grey	20.1	17.7	2.4	17.9	6.1	3.7	19.8	16.9	2.9	0.3	1.51515	0.8	4.73373	-0.5
September 9th	Cold	Cloudy	14	2	8	120	Lower	Hard	Quartzite	3	30	Thick	14.3	588	0.9	0	10YR 8/1	Light grey	18.8	16	2.8	17.2	4.8	2	18.8	15.4	3.4	0	0	0.6	3.8961	-0.6
September 9th	Cold	Cloudy	14	2	8	120	Lower	Hard	Purple siltstone	1	4	Thin	6.4	608	0.95	0	10R 6/1	Reddish grey	20.8	17.7	3.1	19.1	6.8	3.7	20.9	18.1	2.8	-0.1	-0.478469	-0.4	-2.20994	0.3
September 9th	Cold	Cloudy	14	2	8	120	Lower	Soft	Fossiliferous sandstone	4	36	Thin	7.5	742	0.88	1	2.5Y 7/4	Light yellow	19.2	15.3	3.9	17.3	5.2	1.3	19.8	16.1	3.7	-0.6	-3.0303	-0.8	-4.96894	0.2
September 9th	Cold	Cloudy	14	2	8	120	Lower	Soft	Fossiliferous sandstone	4	31	Thin	6.9	580	0.94	0	2.5Y 7/6	Yellowish brown	18.8	16	2.8	16.8	4.8	2	18.5	15.8	2.7	0.3	1.62162	0.2	1.26582	0.1
September 9th	Cold	Cloudy	14	2	8	120	Lower	Soft	White limestone	6	15	Thin	5.9	564	0.92	2	2.5Y 8/1	Light grey	18.5	15.5	3	16.8	4.5	1.5	19	16.3	2.7	-0.5	-2.63158	-0.8	-4.90798	0.3
September 9th	Cold	Cloudy	14	2	8	120	Lower	Soft	Orange limestone	5	22	Intermediate	7.6	584	0.94	0	2.5Y 7/4	Light yellow	19.1	15.9	3.2	17.5	5.1	1.9	18.9	16.1	2.8	0.2	1.0582	-0.2	-1.24224	0.4
September 9th	Cold	Cloudy	14	2	8	120	Lower	Hard	Grey siltstone	2	7	Thick	12.3	544	0.95	0	N 7/0	Greyish white	20	17.4	2.6	18.3	6	3.4	19.4	17.3	2.1	0.6	3.09278	0.1	0.578035	0.5
September 9th	Cold	Cloudy	14	2	8	120	Lower	Soft	Orange limestone	5	23	Thin	6.1	792	0.94	0	5Y 8/3	Pale yellow	19.1	16.5	2.6	17.2	5.1	2.5	18.5	16	2.5	0.6	3.24324	0.5	3.125	0.1
September 9th	Cold	Cloudy	14	2	8	120	Lower	Hard	Purple siltstone	1	2	Thick	14.3	456	0.94	0	7.5YR 5/1	Brownish grey	20	18	2	18.9	6	4	19.5	16.6	2.9	0.5	2.5641	1.4	8.43373	-0.9
September 9th	Cold	Cloudy	14	2	8	120	Lower	Soft	White limestone	6	13	Intermediate	9.4	492	0.91	2	2.5Y 8/1	Light grey	18.8	15.7	3.1	17.9	4.8	1.7	18.6	15.3	3.3	0.2	1.07527	0.4	2.61438	-0.2
September 9th	Cold	Cloudy	14	2	8	120	Lower	Hard	Grey siltstone	2	11	Thin	7.3	696	0.92	0	N 7/0	Greyish white	20.6	18	2.6	18.9	6.6	4	20	17.2	2.8	0.6	3	0.8	4.65116	-0.2
September 9th	Cold	Cloudy	14	2	8	120	Lower	Hard	Purple siltstone	1	1	Intermediate	11.2	408	0.94	0	2.5YR 5/1	Reddish grey	22	19.2	2.8	19.9	8	5.2	21.3	17.7	3.6	0.7	3.28638	1.5	8.47458	-0.8
September 9th	Cold	Cloudy	14	2	8	120	Lower	Hard	Grey siltstone	2	10	Intermediate	8.4	556	0.94	0	2.5GY 7/1	Light olive grey	20.8	18.4	2.4	19.3	6.8	4.4	20.2	17.8	2.4	0.6	2.9703	0.6	3.37079	3.55271e-15
September 9th	Cold	Cloudy	14	2	8	120	Lower	Soft	Orange limestone	5	19	Intermediate	6.8	528	0.92	0	2.5Y 6/4	Dull yellow	19.2	17.2	2	17.8	5.2	3.2	19.4	16.2	3.2	-0.2	-1.03093	1	6.17284	-1.2
September 9th	Cold	Cloudy	14	2	8	120	Lower	Soft	White limestone	6	14	Thin	6.5	816	0.95	2	2.5Y 8/1	Light grey	19.4	16	3.4	16.9	5.4	2	18.8	15.9	2.9	0.6	3.19149	0.1	0.628931	0.5
September 9th	Cold	Cloudy	14	2	8	120	Lower	Soft	Fossiliferous sandstone	4	35	Thick	15	664	0.91	1	2.5Y 5/6	Yellowish brown	19.5	16.1	3.4	16.9	5.5	2.1	18.8	15.3	3.5	0.7	3.7234	0.8	5.22876	-0.1
September 9th	Cold	Cloudy	14	2	8	120	Lower	Hard	Purple siltstone	1	5	Thin	6.5	496	0.97	0	10R 6/1	Reddish grey	20.8	17.9	2.9	19.2	6.8	3.9	20.5	18.1	2.4	0.3	1.46341	-0.2	-1.10497	0.5
September 9th	Cold	Cloudy	14	2	8	120	Lower	Hard	Quartzite	3	28	Intermediate	12.6	464	0.92	0	10YR 8/1	Light grey	18.7	16.5	2.2	17.5	4.7	2.5	18.8	16.4	2.4	-0.1	-0.531915	0.1	0.609756	-0.2
September 9th	Cold	Cloudy	14	2	8	120	Lower	Soft	Orange limestone	5	24	Thin	6	588	0.94	1	2.5Y 7/4	Light yellow	19.4	16.7	2.7	17.9	5.4	2.7	18.8	15.7	3.1	0.6	3.19149	1	6.36943	-0.4
September 9th	Cold	Cloudy	14	2	8	120	Lower	Hard	Quartzite	3	27	Intermediate	11.1	448	0.94	0	10YR 8/1	Light grey	18.8	16.5	2.3	18	4.8	2.5	17.9	15.8	2.1	0.9	5.02793	0.7	4.43038	0.2
September 9th	Cold	Cloudy	14	2	8	120	Lower	Soft	White limestone	6	18	Thick	12	504	0.81	0	2.5Y 8/1	Light grey	18.7	15.3	3.4	16.2	4.7	1.3	18.5	15.3	3.2	0.2	1.08108	0	0	0.2
September 9th	Cold	Cloudy	14	2	8	120	Lower	Soft	Fossiliferous sandstone	4	34	Thick	13.9	520	0.95	0	2.5Y 7/4	Light yellow	18.6	16	2.6	17.3	4.6	2	18.3	15.7	2.6	0.3	1.63934	0.3	1.91083	0
September 9th	Cold	Cloudy	14	2	8	120	Lower	Hard	Purple siltstone	1	6	Thick	13.5	516	1	0	7.5R 5/1	Reddish grey	20.4	17.8	2.6	18.8	6.4	3.8	20.1	17.4	2.7	0.3	1.49254	0.4	2.29885	-0.1
September 9th	Cold	Cloudy	14	2	8	120	Lower	Hard	Quartzite	3	26	Thin	7.9	496	0.94	0	10YR 7/2	Greyish yellow brown	19.6	17	2.6	19	5.6	3	19.1	17.3	1.8	0.5	2.6178	-0.3	-1.7341	0.8
September 9th	Cold	Cloudy	14	2	8	120	Lower	Soft	White limestone	6	17	Intermediate	9.5	448	0.92	1	2.5Y 8/1	Light grey	17.5	15.5	2	16.6	3.5	1.5	18.2	15.9	2.3	-0.7	-3.84615	-0.4	-2.51572	-0.3
September 9th	Cold	Cloudy	14	2	8	120	Lower	Hard	Grey siltstone	2	8	Intermediate	8.1	584	0.97	0	2.5GY 6/1	Olive grey	20.7	18.3	2.4	19.2	6.7	4.3	20.3	17.9	2.4	0.4	1.97044	0.4	2.23464	-3.55271e-15
September 9th	Cold	Cloudy	14	2	8	120	Lower	Soft	Fossiliferous sandstone	4	32	Intermediate	7.9	536	0.91	0	2.5Y 7/4	Light yellow	19	16.8	2.2	18.1	5	2.8	18.5	16.6	1.9	0.5	2.7027	0.2	1.20482	0.3
September 9th	Cold	Cloudy	14	2	8	180	Upper	Hard	Purple siltstone	1	3	Intermediate	11.6	424	0.91	0	10R 5/1	Reddish grey	24.5	21.1	3.4	23.4	10.5	7.1	22.8	19.4	3.4	1.7	7.45614	1.7	8.76289	-3.55271e-15
September 9th	Cold	Cloudy	14	2	8	180	Upper	Soft	Orange limestone	5	21	Thick	12.4	676	0.88	1	2.5Y 8/4	Pale yellow	20.7	17.4	3.3	19.3	6.7	3.4	19.8	16.5	3.3	0.9	4.54545	0.9	5.45455	0
September 9th	Cold	Cloudy	14	2	8	180	Upper	Hard	Quartzite	3	25	Thin	9.6	636	0.87	0	10YR 6/2	Greyish yellow brown	21.6	18.8	2.8	20.3	7.6	4.8	20.8	17.9	2.9	0.8	3.84615	0.9	5.02793	-0.1
September 9th	Cold	Cloudy	14	2	8	180	Upper	Soft	Fossiliferous sandstone	4	33	Intermediate	8.6	672	0.85	0	2.5Y 6/4	Dull yellow	20.6	17.3	3.3	19.9	6.6	3.3	19.8	17.2	2.6	0.8	4.0404	0.1	0.581395	0.7
September 9th	Cold	Cloudy	14	2	8	180	Upper	Hard	Grey siltstone	2	12	Thin	7.5	580	0.95	0	N 6/0	Grey	23.7	20.8	2.9	22.5	9.7	6.8	22.4	19.3	3.1	1.3	5.80357	1.5	7.77202	-0.2
September 9th	Cold	Cloudy	14	2	8	180	Upper	Soft	Orange limestone	5	20	Thick	11.7	356	0.92	0	10YR 8/3	Light yellow	19.8	17.3	2.5	18.9	5.8	3.3	19.4	16.1	3.3	0.4	2.06186	1.2	7.45342	-0.8
September 9th	Cold	Cloudy	14	2	8	180	Upper	Hard	Quartzite	3	29	Thick	14.1	400	0.94	1	10YR 7/2	Greyish yellow brown	19.9	17.5	2.4	19.3	5.9	3.5	19.2	16.3	2.9	0.7	3.64583	1.2	7.36196	-0.5
September 9th	Cold	Cloudy	14	2	8	180	Upper	Soft	White limestone	6	16	Thick	12.3	460	0.94	1	2.5Y 8/1	Light grey	19.2	16.8	2.4	18.4	5.2	2.8	18.7	15.7	3	0.5	2.6738	1.1	7.00637	-0.6
September 9th	Cold	Cloudy	14	2	8	180	Upper	Hard	Grey siltstone	2	9	Thick	12.6	624	0.92	0	2.5GY 7/1	Light olive grey	22.7	18.7	4	21.5	8.7	4.7	21.6	18.3	3.3	1.1	5.09259	0.4	2.18579	0.7
September 9th	Cold	Cloudy	14	2	8	180	Upper	Hard	Quartzite	3	30	Thick	14.3	376	0.96	0	10YR 8/1	Light grey	18.6	16	2.6	17.6	4.6	2	17.5	15.3	2.2	1.1	6.28571	0.7	4.57516	0.4
September 9th	Cold	Cloudy	14	2	8	180	Upper	Hard	Purple siltstone	1	4	Thin	6.4	608	0.94	0	10R 6/1	Reddish grey	21.4	18.9	2.5	20.2	7.4	4.9	20.1	17.5	2.6	1.3	6.46766	1.4	8	-0.1
September 9th	Cold	Cloudy	14	2	8	180	Upper	Soft	Fossiliferous sandstone	4	36	Thin	7.5	732	0.86	0	2.5Y 7/4	Light yellow	20.3	16.2	4.1	18.6	6.3	2.2	19.3	15.2	4.1	1	5.18135	1	6.57895	0
September 9th	Cold	Cloudy	14	2	8	180	Upper	Soft	Fossiliferous sandstone	4	31	Thin	6.9	588	0.94	0	2.5Y 7/6	Yellowish brown	19.7	15.8	3.9	18.7	5.7	1.8	19.3	15.6	3.7	0.4	2.07254	0.2	1.28205	0.2
September 9th	Cold	Cloudy	14	2	8	180	Upper	Soft	White limestone	6	15	Thin	5.9	612	0.82	1	2.5Y 8/1	Light grey	19.2	15	4.2	17.6	5.2	1	18.4	14.6	3.8	0.8	4.34783	0.4	2.73973	0.4
September 9th	Cold	Cloudy	14	2	8	180	Upper	Soft	Orange limestone	5	22	Intermediate	7.6	632	0.94	0	2.5Y 7/4	Light yellow	20.2	16.7	3.5	19.2	6.2	2.7	19.2	15.2	4	1	5.20833	1.5	9.86842	-0.5
September 9th	Cold	Cloudy	14	2	8	180	Upper	Hard	Grey siltstone	2	7	Thick	12.3	436	0.94	0	N 7/0	Greyish white	21.1	17.3	3.8	20.3	7.1	3.3	19.6	17	2.6	1.5	7.65306	0.3	1.76471	1.2
September 9th	Cold	Cloudy	14	2	8	180	Upper	Soft	Orange limestone	5	23	Thin	6.1	808	0.91	0	5Y 8/3	Pale yellow	19.1	16.4	2.7	18.4	5.1	2.4	17.9	14.5	3.4	1.2	6.70391	1.9	13.1034	-0.7
September 9th	Cold	Cloudy	14	2	8	180	Upper	Hard	Purple siltstone	1	2	Thick	14.3	484	0.97	0	7.5YR 5/1	Brownish grey	22.2	18.9	3.3	21.2	8.2	4.9	20.3	17.1	3.2	1.9	9.35961	1.8	10.5263	0.1
September 9th	Cold	Cloudy	14	2	8	180	Upper	Soft	White limestone	6	13	Intermediate	9.4	592	0.91	2	2.5Y 8/1	Light grey	18.2	15.8	2.4	17.4	4.2	1.8	17.3	15.2	2.1	0.9	5.20231	0.6	3.94737	0.3
September 9th	Cold	Cloudy	14	2	8	180	Upper	Hard	Grey siltstone	2	11	Thin	7.3	688	0.94	0	N 7/0	Greyish white	21.3	18.8	2.5	20.8	7.3	4.8	20	17.5	2.5	1.3	6.5	1.3	7.42857	0
September 9th	Cold	Cloudy	14	2	8	180	Upper	Hard	Purple siltstone	1	1	Intermediate	11.2	384	0.92	0	2.5YR 5/1	Reddish grey	21.7	19.3	2.4	21.3	7.7	5.3	20.7	17.6	3.1	1	4.83092	1.7	9.65909	-0.7
September 9th	Cold	Cloudy	14	2	8	180	Upper	Hard	Grey siltstone	2	10	Intermediate	8.4	552	0.94	0	2.5GY 7/1	Light olive grey	20.8	18.6	2.2	19.8	6.8	4.6	19.5	17.1	2.4	1.3	6.66667	1.5	8.77193	-0.2
September 9th	Cold	Cloudy	14	2	8	180	Upper	Soft	Orange limestone	5	19	Intermediate	6.8	604	0.94	0	2.5Y 6/4	Dull yellow	19.5	16.7	2.8	18.2	5.5	2.7	18.6	14.9	3.7	0.9	4.83871	1.8	12.0805	-0.9
September 9th	Cold	Cloudy	14	2	8	180	Upper	Soft	White limestone	6	14	Thin	6.5	830	0.97	4	2.5Y 8/1	Light grey	18.5	15.2	3.3	17.3	4.5	1.2	17.9	14.7	3.2	0.6	3.35196	0.5	3.40136	0.1
September 9th	Cold	Cloudy	14	2	8	180	Upper	Soft	Fossiliferous sandstone	4	35	Thick	15	704	0.91	0	2.5Y 5/6	Yellowish brown	20.5	17.1	3.4	19.2	6.5	3.1	19.7	16.3	3.4	0.8	4.06091	0.8	4.90798	0
September 9th	Cold	Cloudy	14	2	8	180	Upper	Hard	Purple siltstone	1	5	Thin	6.5	508	0.92	0	10R 6/1	Reddish grey	21.2	18.2	3	20.7	7.2	4.2	19.8	17	2.8	1.4	7.07071	1.2	7.05882	0.2
September 9th	Cold	Cloudy	14	2	8	180	Upper	Hard	Quartzite	3	28	Intermediate	12.6	328	0.95	0	10YR 8/1	Light grey	17.8	15.3	2.5	16.6	3.8	1.3	16.8	14.6	2.2	1	5.95238	0.7	4.79452	0.3
September 9th	Cold	Cloudy	14	2	8	180	Upper	Soft	Orange limestone	5	24	Thin	6	620	0.94	0	2.5Y 7/4	Light yellow	19.3	16.3	3	17.8	5.3	2.3	18.4	15.4	3	0.9	4.8913	0.9	5.84416	0
September 9th	Cold	Cloudy	14	2	8	180	Upper	Hard	Quartzite	3	27	Intermediate	11.1	444	0.94	0	10YR 8/1	Light grey	17.8	15.9	1.9	16.8	3.8	1.9	17.3	15.3	2	0.5	2.89017	0.6	3.92157	-0.1
September 9th	Cold	Cloudy	14	2	8	180	Upper	Soft	White limestone	6	18	Thick	12	544	0.85	1	2.5Y 8/1	Light grey	18.3	15.8	2.5	16.5	4.3	1.8	17.8	15.8	2	0.5	2.80899	0	0	0.5
September 9th	Cold	Cloudy	14	2	8	180	Upper	Soft	Fossiliferous sandstone	4	34	Thick	13.9	436	0.76	0	2.5Y 7/4	Light yellow	19.3	15.3	4	18.2	5.3	1.3	18.9	15.8	3.1	0.4	2.1164	-0.5	-3.16456	0.9
September 9th	Cold	Cloudy	14	2	8	180	Upper	Hard	Purple siltstone	1	6	Thick	13.5	596	0.94	0	7.5R 5/1	Reddish grey	22	18.4	3.6	21.4	8	4.4	21.7	18.1	3.6	0.3	1.38249	0.3	1.65746	3.55271e-15
September 9th	Cold	Cloudy	14	2	8	180	Upper	Hard	Quartzite	3	26	Thin	7.9	500	0.97	0	10YR 7/2	Greyish yellow brown	19.6	16.8	2.8	17.9	5.6	2.8	18.8	16.2	2.6	0.8	4.25532	0.6	3.7037	0.2
September 9th	Cold	Cloudy	14	2	8	180	Upper	Soft	White limestone	6	17	Intermediate	9.5	444	0.95	0	2.5Y 8/1	Light grey	18.4	15.2	3.2	17	4.4	1.2	17.9	15.1	2.8	0.5	2.7933	0.1	0.662252	0.4
September 9th	Cold	Cloudy	14	2	8	180	Upper	Hard	Grey siltstone	2	8	Intermediate	8.1	592	0.97	0	2.5GY 6/1	Olive grey	21.2	17.4	3.8	20.2	7.2	3.4	20.8	17.3	3.5	0.4	1.92308	0.1	0.578035	0.3
September 9th	Cold	Cloudy	14	2	8	180	Upper	Soft	Fossiliferous sandstone	4	32	Intermediate	7.9	524	0.92	0	2.5Y 7/4	Light yellow	19.7	16.8	2.9	18.5	5.7	2.8	19	16	3	0.7	3.68421	0.8	5	-0.1
September 9th	Cold	Cloudy	14	2	8	180	Lower	Hard	Purple siltstone	1	3	Intermediate	11.6	354	0.91	0	10R 5/1	Reddish grey	20.5	17.5	3	19.4	6.5	3.5	19.3	16.7	2.6	1.2	6.21762	0.8	4.79042	0.4
September 9th	Cold	Cloudy	14	2	8	180	Lower	Soft	Orange limestone	5	21	Thick	12.4	608	0.91	0	2.5Y 8/4	Pale yellow	17.5	14.2	3.3	15.1	3.5	0.2	16.9	13.9	3	0.6	3.5503	0.3	2.15827	0.3
September 9th	Cold	Cloudy	14	2	8	180	Lower	Hard	Quartzite	3	25	Thin	9.6	584	0.92	0	10YR 6/2	Greyish yellow brown	20	16.4	3.6	17.5	6	2.4	18.9	15.7	3.2	1.1	5.82011	0.7	4.4586	0.4
September 9th	Cold	Cloudy	14	2	8	180	Lower	Soft	Fossiliferous sandstone	4	33	Intermediate	8.6	680	0.91	0	2.5Y 6/4	Dull yellow	19.2	16.6	2.6	18.1	5.2	2.6	17.8	15.3	2.5	1.4	7.86517	1.3	8.49673	0.1
September 9th	Cold	Cloudy	14	2	8	180	Lower	Hard	Grey siltstone	2	12	Thin	7.5	576	0.94	0	N 6/0	Grey	22.1	19.1	3	19.8	8.1	5.1	21	18	3	1.1	5.2381	1.1	6.11111	0
September 9th	Cold	Cloudy	14	2	8	180	Lower	Soft	Orange limestone	5	20	Thick	11.7	420	0.97	0	10YR 8/3	Light yellow	17.9	15.5	2.4	16.1	3.9	1.5	17.4	14.8	2.6	0.5	2.87356	0.7	4.72973	-0.2
September 9th	Cold	Cloudy	14	2	8	180	Lower	Hard	Quartzite	3	29	Thick	14.1	368	0.94	0	10YR 7/2	Greyish yellow brown	18.7	17	1.7	17.6	4.7	3	18.4	16.4	2	0.3	1.63043	0.6	3.65854	-0.3
September 9th	Cold	Cloudy	14	2	8	180	Lower	Soft	White limestone	6	16	Thick	12.3	412	0.94	0	2.5Y 8/1	Light grey	17.9	15.7	2.2	16.4	3.9	1.7	17.8	15.4	2.4	0.1	0.561798	0.3	1.94805	-0.2
September 9th	Cold	Cloudy	14	2	8	180	Lower	Hard	Grey siltstone	2	9	Thick	12.6	532	0.97	0	2.5GY 7/1	Light olive grey	21.6	19.3	2.3	19.8	7.6	5.3	20.1	17.7	2.4	1.5	7.46269	1.6	9.03955	-0.1
September 9th	Cold	Cloudy	14	2	8	180	Lower	Hard	Quartzite	3	30	Thick	14.3	588	0.9	0	10YR 8/1	Light grey	19.5	17.1	2.4	18.3	5.5	3.1	18.8	16	2.8	0.7	3.7234	1.1	6.875	-0.4
September 9th	Cold	Cloudy	14	2	8	180	Lower	Hard	Purple siltstone	1	4	Thin	6.4	608	0.95	0	10R 6/1	Reddish grey	22.5	19.6	2.9	20.6	8.5	5.6	20.8	17.7	3.1	1.7	8.17308	1.9	10.7345	-0.2
September 9th	Cold	Cloudy	14	2	8	180	Lower	Soft	Fossiliferous sandstone	4	36	Thin	7.5	742	0.88	1	2.5Y 7/4	Light yellow	21.3	17.3	4	18.8	7.3	3.3	19.2	15.3	3.9	2.1	10.9375	2	13.0719	0.1
September 9th	Cold	Cloudy	14	2	8	180	Lower	Soft	Fossiliferous sandstone	4	31	Thin	6.9	580	0.94	0	2.5Y 7/6	Yellowish brown	20.3	17.3	3	18.8	6.3	3.3	18.8	16	2.8	1.5	7.97872	1.3	8.125	0.2
September 9th	Cold	Cloudy	14	2	8	180	Lower	Soft	White limestone	6	15	Thin	5.9	564	0.92	2	2.5Y 8/1	Light grey	19.9	16.7	3.2	17.6	5.9	2.7	18.5	15.5	3	1.4	7.56757	1.2	7.74194	0.2
September 9th	Cold	Cloudy	14	2	8	180	Lower	Soft	Orange limestone	5	22	Intermediate	7.6	584	0.94	0	2.5Y 7/4	Light yellow	20.2	17.1	3.1	18	6.2	3.1	19.1	15.9	3.2	1.1	5.75916	1.2	7.54717	-0.1
September 9th	Cold	Cloudy	14	2	8	180	Lower	Hard	Grey siltstone	2	7	Thick	12.3	544	0.95	0	N 7/0	Greyish white	20.8	18.1	2.7	19.2	6.8	4.1	20	17.4	2.6	0.8	4	0.7	4.02299	0.1
September 9th	Cold	Cloudy	14	2	8	180	Lower	Soft	Orange limestone	5	23	Thin	6.1	792	0.94	0	5Y 8/3	Pale yellow	20.4	16.9	3.5	18.5	6.4	2.9	19.1	16.5	2.6	1.3	6.80628	0.4	2.42424	0.9
September 9th	Cold	Cloudy	14	2	8	180	Lower	Hard	Purple siltstone	1	2	Thick	14.3	456	0.94	0	7.5YR 5/1	Brownish grey	21.6	18.6	3	19.9	7.6	4.6	20	18	2	1.6	8	0.6	3.33333	1
September 9th	Cold	Cloudy	14	2	8	180	Lower	Soft	White limestone	6	13	Intermediate	9.4	492	0.91	2	2.5Y 8/1	Light grey	19.1	15.4	3.7	17.6	5.1	1.4	18.8	15.7	3.1	0.3	1.59574	-0.3	-1.91083	0.6
September 9th	Cold	Cloudy	14	2	8	180	Lower	Hard	Grey siltstone	2	11	Thin	7.3	696	0.92	0	N 7/0	Greyish white	21.9	18.8	3.1	19.5	7.9	4.8	20.6	18	2.6	1.3	6.31068	0.8	4.44444	0.5
September 9th	Cold	Cloudy	14	2	8	180	Lower	Hard	Purple siltstone	1	1	Intermediate	11.2	408	0.94	0	2.5YR 5/1	Reddish grey	22.9	20.4	2.5	21.1	8.9	6.4	22	19.2	2.8	0.9	4.09091	1.2	6.25	-0.3
September 9th	Cold	Cloudy	14	2	8	180	Lower	Hard	Grey siltstone	2	10	Intermediate	8.4	556	0.94	0	2.5GY 7/1	Light olive grey	21.9	19.4	2.5	20.1	7.9	5.4	20.8	18.4	2.4	1.1	5.28846	1	5.43478	0.1
September 9th	Cold	Cloudy	14	2	8	180	Lower	Soft	Orange limestone	5	19	Intermediate	6.8	528	0.92	0	2.5Y 6/4	Dull yellow	20.3	17.6	2.7	18.3	6.3	3.6	19.2	17.2	2	1.1	5.72917	0.4	2.32558	0.7
September 9th	Cold	Cloudy	14	2	8	180	Lower	Soft	White limestone	6	14	Thin	6.5	816	0.95	2	2.5Y 8/1	Light grey	19.5	16.9	2.6	17.8	5.5	2.9	19.4	16	3.4	0.1	0.515464	0.9	5.625	-0.8
September 9th	Cold	Cloudy	14	2	8	180	Lower	Soft	Fossiliferous sandstone	4	35	Thick	15	664	0.91	1	2.5Y 5/6	Yellowish brown	20.7	17.1	3.6	18.8	6.7	3.1	19.5	16.1	3.4	1.2	6.15385	1	6.21118	0.2
September 9th	Cold	Cloudy	14	2	8	180	Lower	Hard	Purple siltstone	1	5	Thin	6.5	496	0.97	0	10R 6/1	Reddish grey	22.4	20	2.4	20.6	8.4	6	20.8	17.9	2.9	1.6	7.69231	2.1	11.7318	-0.5
September 9th	Cold	Cloudy	14	2	8	180	Lower	Hard	Quartzite	3	28	Intermediate	12.6	464	0.92	0	10YR 8/1	Light grey	20.1	17.5	2.6	18.4	6.1	3.5	18.7	16.5	2.2	1.4	7.48663	1	6.06061	0.4
September 9th	Cold	Cloudy	14	2	8	180	Lower	Soft	Orange limestone	5	24	Thin	6	588	0.94	1	2.5Y 7/4	Light yellow	19.4	17.4	2	18.7	5.4	3.4	19.4	16.7	2.7	0	0	0.7	4.19162	-0.7
September 9th	Cold	Cloudy	14	2	8	180	Lower	Hard	Quartzite	3	27	Intermediate	11.1	448	0.94	0	10YR 8/1	Light grey	19.8	17.3	2.5	18.6	5.8	3.3	18.8	16.5	2.3	1	5.31915	0.8	4.84848	0.2
September 9th	Cold	Cloudy	14	2	8	180	Lower	Soft	White limestone	6	18	Thick	12	504	0.81	0	2.5Y 8/1	Light grey	18.9	16.6	2.3	17.1	4.9	2.6	18.7	15.3	3.4	0.2	1.06952	1.3	8.49673	-1.1
September 9th	Cold	Cloudy	14	2	8	180	Lower	Soft	Fossiliferous sandstone	4	34	Thick	13.9	520	0.95	0	2.5Y 7/4	Light yellow	19.3	16.6	2.7	18.1	5.3	2.6	18.6	16	2.6	0.7	3.76344	0.6	3.75	0.1
September 9th	Cold	Cloudy	14	2	8	180	Lower	Hard	Purple siltstone	1	6	Thick	13.5	516	1	0	7.5R 5/1	Reddish grey	22.4	19.9	2.5	20.4	8.4	5.9	20.4	17.8	2.6	2	9.80392	2.1	11.7978	-0.1
September 9th	Cold	Cloudy	14	2	8	180	Lower	Hard	Quartzite	3	26	Thin	7.9	496	0.94	0	10YR 7/2	Greyish yellow brown	21	18.9	2.1	20.2	7	4.9	19.6	17	2.6	1.4	7.14286	1.9	11.1765	-0.5
September 9th	Cold	Cloudy	14	2	8	180	Lower	Soft	White limestone	6	17	Intermediate	9.5	448	0.92	1	2.5Y 8/1	Light grey	18.7	16.8	1.9	18.1	4.7	2.8	17.5	15.5	2	1.2	6.85714	1.3	8.3871	-0.1
September 9th	Cold	Cloudy	14	2	8	180	Lower	Hard	Grey siltstone	2	8	Intermediate	8.1	584	0.97	0	2.5GY 6/1	Olive grey	21.9	19.2	2.7	20.4	7.9	5.2	20.7	18.3	2.4	1.2	5.7971	0.9	4.91803	0.3
September 9th	Cold	Cloudy	14	2	8	180	Lower	Soft	Fossiliferous sandstone	4	32	Intermediate	7.9	536	0.91	0	2.5Y 7/4	Light yellow	20.1	18	2.1	19	6.1	4	19	16.8	2.2	1.1	5.78947	1.2	7.14286	-0.1
September 9th	Cold	Cloudy	15	2	8	240	Upper	Hard	Purple siltstone	1	3	Intermediate	11.6	424	0.91	0	10R 5/1	Reddish grey	23.8	20.8	3	22.7	8.8	5.8	24.5	21.1	3.4	-0.7	-2.85714	-0.3	-1.4218	-0.4
September 9th	Cold	Cloudy	15	2	8	240	Upper	Soft	Orange limestone	5	21	Thick	12.4	676	0.88	1	2.5Y 8/4	Pale yellow	19.8	17	2.8	18.9	4.8	2	20.7	17.4	3.3	-0.9	-4.34783	-0.4	-2.29885	-0.5
September 9th	Cold	Cloudy	15	2	8	240	Upper	Hard	Quartzite	3	25	Thin	9.6	636	0.87	0	10YR 6/2	Greyish yellow brown	20.9	17.1	3.8	19	5.9	2.1	21.6	18.8	2.8	-0.7	-3.24074	-1.7	-9.04255	1
September 9th	Cold	Cloudy	15	2	8	240	Upper	Soft	Fossiliferous sandstone	4	33	Intermediate	8.6	672	0.85	0	2.5Y 6/4	Dull yellow	20.8	17.1	3.7	19.8	5.8	2.1	20.6	17.3	3.3	0.2	0.970874	-0.2	-1.15607	0.4
September 9th	Cold	Cloudy	15	2	8	240	Upper	Hard	Grey siltstone	2	12	Thin	7.5	580	0.95	0	N 6/0	Grey	22.5	19.9	2.6	21.6	7.5	4.9	23.7	20.8	2.9	-1.2	-5.06329	-0.9	-4.32692	-0.3
September 9th	Cold	Cloudy	15	2	8	240	Upper	Soft	Orange limestone	5	20	Thick	11.7	356	0.92	0	10YR 8/3	Light yellow	20.2	16.8	3.4	18.9	5.2	1.8	19.8	17.3	2.5	0.4	2.0202	-0.5	-2.89017	0.9
September 9th	Cold	Cloudy	15	2	8	240	Upper	Hard	Quartzite	3	29	Thick	14.1	400	0.94	1	10YR 7/2	Greyish yellow brown	19.4	16.9	2.5	18.3	4.4	1.9	19.9	17.5	2.4	-0.5	-2.51256	-0.6	-3.42857	0.1
September 9th	Cold	Cloudy	15	2	8	240	Upper	Soft	White limestone	6	16	Thick	12.3	460	0.94	1	2.5Y 8/1	Light grey	19.6	16.7	2.9	18.5	4.6	1.7	19.2	16.8	2.4	0.4	2.08333	-0.1	-0.595238	0.5
September 9th	Cold	Cloudy	15	2	8	240	Upper	Hard	Grey siltstone	2	9	Thick	12.6	624	0.92	0	2.5GY 7/1	Light olive grey	23	19.7	3.3	21.5	8	4.7	22.7	18.7	4	0.3	1.32159	1	5.34759	-0.7
September 9th	Cold	Cloudy	15	2	8	240	Upper	Hard	Quartzite	3	30	Thick	14.3	376	0.96	0	10YR 8/1	Light grey	18.5	15.5	3	17.1	3.5	0.5	18.6	16	2.6	-0.1	-0.537634	-0.5	-3.125	0.4
September 9th	Cold	Cloudy	15	2	8	240	Upper	Hard	Purple siltstone	1	4	Thin	6.4	608	0.94	0	10R 6/1	Reddish grey	21.5	18.6	2.9	19.5	6.5	3.6	21.4	18.9	2.5	0.1	0.46729	-0.3	-1.5873	0.4
September 9th	Cold	Cloudy	15	2	8	240	Upper	Soft	Fossiliferous sandstone	4	36	Thin	7.5	732	0.86	0	2.5Y 7/4	Light yellow	20.5	17.1	3.4	18.8	5.5	2.1	20.3	16.2	4.1	0.2	0.985222	0.9	5.55556	-0.7
September 9th	Cold	Cloudy	15	2	8	240	Upper	Soft	Fossiliferous sandstone	4	31	Thin	6.9	588	0.94	0	2.5Y 7/6	Yellowish brown	20.3	17.2	3.1	19.6	5.3	2.2	19.7	15.8	3.9	0.6	3.04569	1.4	8.86076	-0.8
September 9th	Cold	Cloudy	15	2	8	240	Upper	Soft	White limestone	6	15	Thin	5.9	612	0.82	1	2.5Y 8/1	Light grey	19.6	15.6	4	18	4.6	0.6	19.2	15	4.2	0.4	2.08333	0.6	4	-0.2
September 9th	Cold	Cloudy	15	2	8	240	Upper	Soft	Orange limestone	5	22	Intermediate	7.6	632	0.94	0	2.5Y 7/4	Light yellow	21	17	4	19.9	6	2	20.2	16.7	3.5	0.8	3.9604	0.3	1.79641	0.5
September 9th	Cold	Cloudy	15	2	8	240	Upper	Hard	Grey siltstone	2	7	Thick	12.3	436	0.94	0	N 7/0	Greyish white	21.4	17.2	4.2	20.5	6.4	2.2	21.1	17.3	3.8	0.3	1.4218	-0.1	-0.578035	0.4
September 9th	Cold	Cloudy	15	2	8	240	Upper	Soft	Orange limestone	5	23	Thin	6.1	808	0.91	0	5Y 8/3	Pale yellow	19.7	16.8	2.9	18.5	4.7	1.8	19.1	16.4	2.7	0.6	3.14136	0.4	2.43902	0.2
September 9th	Cold	Cloudy	15	2	8	240	Upper	Hard	Purple siltstone	1	2	Thick	14.3	484	0.97	0	7.5YR 5/1	Brownish grey	22.3	19.5	2.8	20.8	7.3	4.5	22.2	18.9	3.3	0.1	0.45045	0.6	3.1746	-0.5
September 9th	Cold	Cloudy	15	2	8	240	Upper	Soft	White limestone	6	13	Intermediate	9.4	592	0.91	2	2.5Y 8/1	Light grey	18.6	15.8	2.8	17.7	3.6	0.8	18.2	15.8	2.4	0.4	2.1978	0	0	0.4
September 9th	Cold	Cloudy	15	2	8	240	Upper	Hard	Grey siltstone	2	11	Thin	7.3	688	0.94	0	N 7/0	Greyish white	21.9	19.1	2.8	20.9	6.9	4.1	21.3	18.8	2.5	0.6	2.8169	0.3	1.59574	0.3
September 9th	Cold	Cloudy	15	2	8	240	Upper	Hard	Purple siltstone	1	1	Intermediate	11.2	384	0.92	0	2.5YR 5/1	Reddish grey	22.5	19.3	3.2	21.8	7.5	4.3	21.7	19.3	2.4	0.8	3.68664	0	0	0.8
September 9th	Cold	Cloudy	15	2	8	240	Upper	Hard	Grey siltstone	2	10	Intermediate	8.4	552	0.94	0	2.5GY 7/1	Light olive grey	21.6	18.7	2.9	20.3	6.6	3.7	20.8	18.6	2.2	0.8	3.84615	0.1	0.537634	0.7
September 9th	Cold	Cloudy	15	2	8	240	Upper	Soft	Orange limestone	5	19	Intermediate	6.8	604	0.94	0	2.5Y 6/4	Dull yellow	20.5	17.1	3.4	19.4	5.5	2.1	19.5	16.7	2.8	1	5.12821	0.4	2.39521	0.6
September 9th	Cold	Cloudy	15	2	8	240	Upper	Soft	White limestone	6	14	Thin	6.5	830	0.97	4	2.5Y 8/1	Light grey	19.4	16.1	3.3	18.3	4.4	1.1	18.5	15.2	3.3	0.9	4.86486	0.9	5.92105	-3.55271e-15
September 9th	Cold	Cloudy	15	2	8	240	Upper	Soft	Fossiliferous sandstone	4	35	Thick	15	704	0.91	0	2.5Y 5/6	Yellowish brown	21.8	18.5	3.3	20.3	6.8	3.5	20.5	17.1	3.4	1.3	6.34146	1.4	8.18713	-0.1
September 9th	Cold	Cloudy	15	2	8	240	Upper	Hard	Purple siltstone	1	5	Thin	6.5	508	0.92	0	10R 6/1	Reddish grey	21.7	18.1	3.6	21.1	6.7	3.1	21.2	18.2	3	0.5	2.35849	-0.1	-0.549451	0.6
September 9th	Cold	Cloudy	15	2	8	240	Upper	Hard	Quartzite	3	28	Intermediate	12.6	328	0.95	0	10YR 8/1	Light grey	18.9	16.4	2.5	17.3	3.9	1.4	17.8	15.3	2.5	1.1	6.17978	1.1	7.18954	0
September 9th	Cold	Cloudy	15	2	8	240	Upper	Soft	Orange limestone	5	24	Thin	6	620	0.94	0	2.5Y 7/4	Light yellow	20.3	17.2	3.1	18.6	5.3	2.2	19.3	16.3	3	1	5.18135	0.9	5.52147	0.1
September 9th	Cold	Cloudy	15	2	8	240	Upper	Hard	Quartzite	3	27	Intermediate	11.1	444	0.94	0	10YR 8/1	Light grey	18.2	15.8	2.4	17.3	3.2	0.8	17.8	15.9	1.9	0.4	2.24719	-0.1	-0.628931	0.5
September 9th	Cold	Cloudy	15	2	8	240	Upper	Soft	White limestone	6	18	Thick	12	544	0.85	1	2.5Y 8/1	Light grey	19.1	16	3.1	17.6	4.1	1	18.3	15.8	2.5	0.8	4.37158	0.2	1.26582	0.6
September 9th	Cold	Cloudy	15	2	8	240	Upper	Soft	Fossiliferous sandstone	4	34	Thick	13.9	436	0.76	0	2.5Y 7/4	Light yellow	20.9	16.6	4.3	19.4	5.9	1.6	19.3	15.3	4	1.6	8.29016	1.3	8.49673	0.3
September 9th	Cold	Cloudy	15	2	8	240	Upper	Hard	Purple siltstone	1	6	Thick	13.5	596	0.94	0	7.5R 5/1	Reddish grey	23	18.8	4.2	22	8	3.8	22	18.4	3.6	1	4.54545	0.4	2.17391	0.6
September 9th	Cold	Cloudy	15	2	8	240	Upper	Hard	Quartzite	3	26	Thin	7.9	500	0.97	0	10YR 7/2	Greyish yellow brown	19.9	16.6	3.3	17.8	4.9	1.6	19.6	16.8	2.8	0.3	1.53061	-0.2	-1.19048	0.5
September 9th	Cold	Cloudy	15	2	8	240	Upper	Soft	White limestone	6	17	Intermediate	9.5	444	0.95	0	2.5Y 8/1	Light grey	19.2	16.1	3.1	17.4	4.2	1.1	18.4	15.2	3.2	0.8	4.34783	0.9	5.92105	-0.1
September 9th	Cold	Cloudy	15	2	8	240	Upper	Hard	Grey siltstone	2	8	Intermediate	8.1	592	0.97	0	2.5GY 6/1	Olive grey	21.7	18.3	3.4	20.6	6.7	3.3	21.2	17.4	3.8	0.5	2.35849	0.9	5.17241	-0.4
September 9th	Cold	Cloudy	15	2	8	240	Upper	Soft	Fossiliferous sandstone	4	32	Intermediate	7.9	524	0.92	0	2.5Y 7/4	Light yellow	20.2	17.8	2.4	18.9	5.2	2.8	19.7	16.8	2.9	0.5	2.53807	1	5.95238	-0.5
September 9th	Cold	Cloudy	15	2	8	240	Lower	Hard	Purple siltstone	1	3	Intermediate	11.6	354	0.91	0	10R 5/1	Reddish grey	21.2	18	3.2	19.4	6.2	3	20.5	17.5	3	0.7	3.41463	0.5	2.85714	0.2
September 9th	Cold	Cloudy	15	2	8	240	Lower	Soft	Orange limestone	5	21	Thick	12.4	608	0.91	0	2.5Y 8/4	Pale yellow	17.1	14.4	2.7	15.5	2.1	-0.6	17.5	14.2	3.3	-0.4	-2.28571	0.2	1.40845	-0.6
September 9th	Cold	Cloudy	15	2	8	240	Lower	Hard	Quartzite	3	25	Thin	9.6	584	0.92	0	10YR 6/2	Greyish yellow brown	20.7	16.7	4	17.9	5.7	1.7	20	16.4	3.6	0.7	3.5	0.3	1.82927	0.4
September 9th	Cold	Cloudy	15	2	8	240	Lower	Soft	Fossiliferous sandstone	4	33	Intermediate	8.6	680	0.91	0	2.5Y 6/4	Dull yellow	19.4	16.5	2.9	18.4	4.4	1.5	19.2	16.6	2.6	0.2	1.04167	-0.1	-0.60241	0.3
September 9th	Cold	Cloudy	15	2	8	240	Lower	Hard	Grey siltstone	2	12	Thin	7.5	576	0.94	0	N 6/0	Grey	23.3	19.5	3.8	20.2	8.3	4.5	22.1	19.1	3	1.2	5.42986	0.4	2.09424	0.8
September 9th	Cold	Cloudy	15	2	8	240	Lower	Soft	Orange limestone	5	20	Thick	11.7	420	0.97	0	10YR 8/3	Light yellow	19	16.3	2.7	17.2	4	1.3	17.9	15.5	2.4	1.1	6.14525	0.8	5.16129	0.3
September 9th	Cold	Cloudy	15	2	8	240	Lower	Hard	Quartzite	3	29	Thick	14.1	368	0.94	0	10YR 7/2	Greyish yellow brown	19.3	17.6	1.7	18	4.3	2.6	18.7	17	1.7	0.6	3.20856	0.6	3.52941	0
September 9th	Cold	Cloudy	15	2	8	240	Lower	Soft	White limestone	6	16	Thick	12.3	412	0.94	0	2.5Y 8/1	Light grey	18.6	16.2	2.4	16.9	3.6	1.2	17.9	15.7	2.2	0.7	3.91061	0.5	3.18471	0.2
September 9th	Cold	Cloudy	15	2	8	240	Lower	Hard	Grey siltstone	2	9	Thick	12.6	532	0.97	0	2.5GY 7/1	Light olive grey	22.4	19.6	2.8	19.5	7.4	4.6	21.6	19.3	2.3	0.8	3.7037	0.3	1.5544	0.5
September 9th	Cold	Cloudy	15	2	8	240	Lower	Hard	Quartzite	3	30	Thick	14.3	588	0.9	0	10YR 8/1	Light grey	19.3	16.6	2.7	18.2	4.3	1.6	19.5	17.1	2.4	-0.2	-1.02564	-0.5	-2.92398	0.3
September 9th	Cold	Cloudy	15	2	8	240	Lower	Hard	Purple siltstone	1	4	Thin	6.4	608	0.95	0	10R 6/1	Reddish grey	23	19.7	3.3	20.9	8	4.7	22.5	19.6	2.9	0.5	2.22222	0.1	0.510204	0.4
September 9th	Cold	Cloudy	15	2	8	240	Lower	Soft	Fossiliferous sandstone	4	36	Thin	7.5	742	0.88	1	2.5Y 7/4	Light yellow	21.3	17.7	3.6	19.6	6.3	2.7	21.3	17.3	4	0	0	0.4	2.31214	-0.4
September 9th	Cold	Cloudy	15	2	8	240	Lower	Soft	Fossiliferous sandstone	4	31	Thin	6.9	580	0.94	0	2.5Y 7/6	Yellowish brown	20.7	17.8	2.9	18.4	5.7	2.8	20.3	17.3	3	0.4	1.97044	0.5	2.89017	-0.1
September 9th	Cold	Cloudy	15	2	8	240	Lower	Soft	White limestone	6	15	Thin	5.9	564	0.92	2	2.5Y 8/1	Light grey	20.7	17	3.7	17.8	5.7	2	19.9	16.7	3.2	0.8	4.0201	0.3	1.79641	0.5
September 9th	Cold	Cloudy	15	2	8	240	Lower	Soft	Orange limestone	5	22	Intermediate	7.6	584	0.94	0	2.5Y 7/4	Light yellow	21.4	17.3	4.1	18.7	6.4	2.3	20.2	17.1	3.1	1.2	5.94059	0.2	1.16959	1
September 9th	Cold	Cloudy	15	2	8	240	Lower	Hard	Grey siltstone	2	7	Thick	12.3	544	0.95	0	N 7/0	Greyish white	21.2	18.7	2.5	19.3	6.2	3.7	20.8	18.1	2.7	0.4	1.92308	0.6	3.31492	-0.2
September 9th	Cold	Cloudy	15	2	8	240	Lower	Soft	Orange limestone	5	23	Thin	6.1	792	0.94	0	5Y 8/3	Pale yellow	20.9	18	2.9	18.8	5.9	3	20.4	16.9	3.5	0.5	2.45098	1.1	6.50888	-0.6
September 9th	Cold	Cloudy	15	2	8	240	Lower	Hard	Purple siltstone	1	2	Thick	14.3	456	0.94	0	7.5YR 5/1	Brownish grey	21.4	19.3	2.1	20.2	6.4	4.3	21.6	18.6	3	-0.2	-0.925926	0.7	3.76344	-0.9
September 9th	Cold	Cloudy	15	2	8	240	Lower	Soft	White limestone	6	13	Intermediate	9.4	492	0.91	2	2.5Y 8/1	Light grey	20.3	16.4	3.9	18.6	5.3	1.4	19.1	15.4	3.7	1.2	6.28272	1	6.49351	0.2
September 9th	Cold	Cloudy	15	2	8	240	Lower	Hard	Grey siltstone	2	11	Thin	7.3	696	0.92	0	N 7/0	Greyish white	22.2	19.3	2.9	19.9	7.2	4.3	21.9	18.8	3.1	0.3	1.36986	0.5	2.65957	-0.2
September 9th	Cold	Cloudy	15	2	8	240	Lower	Hard	Purple siltstone	1	1	Intermediate	11.2	408	0.94	0	2.5YR 5/1	Reddish grey	23.4	19.8	3.6	20.8	8.4	4.8	22.9	20.4	2.5	0.5	2.18341	-0.6	-2.94118	1.1
September 9th	Cold	Cloudy	15	2	8	240	Lower	Hard	Grey siltstone	2	10	Intermediate	8.4	556	0.94	0	2.5GY 7/1	Light olive grey	21.9	19.2	2.7	20.1	6.9	4.2	21.9	19.4	2.5	0	0	-0.2	-1.03093	0.2
September 9th	Cold	Cloudy	15	2	8	240	Lower	Soft	Orange limestone	5	19	Intermediate	6.8	528	0.92	0	2.5Y 6/4	Dull yellow	21	17.6	3.4	18.6	6	2.6	20.3	17.6	2.7	0.7	3.44828	0	0	0.7
September 9th	Cold	Cloudy	15	2	8	240	Lower	Soft	White limestone	6	14	Thin	6.5	816	0.95	2	2.5Y 8/1	Light grey	19.9	16.9	3	17.4	4.9	1.9	19.5	16.9	2.6	0.4	2.05128	0	0	0.4
September 9th	Cold	Cloudy	15	2	8	240	Lower	Soft	Fossiliferous sandstone	4	35	Thick	15	664	0.91	1	2.5Y 5/6	Yellowish brown	20.1	16.6	3.5	17.7	5.1	1.6	20.7	17.1	3.6	-0.6	-2.89855	-0.5	-2.92398	-0.1
September 9th	Cold	Cloudy	15	2	8	240	Lower	Hard	Purple siltstone	1	5	Thin	6.5	496	0.97	0	10R 6/1	Reddish grey	21.5	18.7	2.8	20.4	6.5	3.7	22.4	20	2.4	-0.9	-4.01786	-1.3	-6.5	0.4
September 9th	Cold	Cloudy	15	2	8	240	Lower	Hard	Quartzite	3	28	Intermediate	12.6	464	0.92	0	10YR 8/1	Light grey	19.1	17.4	1.7	18.4	4.1	2.4	20.1	17.5	2.6	-1	-4.97512	-0.1	-0.571429	-0.9
September 9th	Cold	Cloudy	15	2	8	240	Lower	Soft	Orange limestone	5	24	Thin	6	588	0.94	1	2.5Y 7/4	Light yellow	20	16.9	3.1	18.4	5	1.9	19.4	17.4	2	0.6	3.09278	-0.5	-2.87356	1.1
September 9th	Cold	Cloudy	15	2	8	240	Lower	Hard	Quartzite	3	27	Intermediate	11.1	448	0.94	0	10YR 8/1	Light grey	19.2	16.7	2.5	18.4	4.2	1.7	19.8	17.3	2.5	-0.6	-3.0303	-0.6	-3.46821	0
September 9th	Cold	Cloudy	15	2	8	240	Lower	Soft	White limestone	6	18	Thick	12	504	0.81	0	2.5Y 8/1	Light grey	19	15.8	3.2	17.1	4	0.8	18.9	16.6	2.3	0.1	0.529101	-0.8	-4.81928	0.9
September 9th	Cold	Cloudy	15	2	8	240	Lower	Soft	Fossiliferous sandstone	4	34	Thick	13.9	520	0.95	0	2.5Y 7/4	Light yellow	19.1	16.7	2.4	17.8	4.1	1.7	19.3	16.6	2.7	-0.2	-1.03627	0.1	0.60241	-0.3
September 9th	Cold	Cloudy	15	2	8	240	Lower	Hard	Purple siltstone	1	6	Thick	13.5	516	1	0	7.5R 5/1	Reddish grey	20.8	18.7	2.1	20.1	5.8	3.7	22.4	19.9	2.5	-1.6	-7.14286	-1.2	-6.03015	-0.4
September 9th	Cold	Cloudy	15	2	8	240	Lower	Hard	Quartzite	3	26	Thin	7.9	496	0.94	0	10YR 7/2	Greyish yellow brown	20.2	17.2	3	19.7	5.2	2.2	21	18.9	2.1	-0.8	-3.80952	-1.7	-8.99471	0.9
September 9th	Cold	Cloudy	15	2	8	240	Lower	Soft	White limestone	6	17	Intermediate	9.5	448	0.92	1	2.5Y 8/1	Light grey	18.6	16.3	2.3	17.8	3.6	1.3	18.7	16.8	1.9	-0.1	-0.534759	-0.5	-2.97619	0.4
September 9th	Cold	Cloudy	15	2	8	240	Lower	Hard	Grey siltstone	2	8	Intermediate	8.1	584	0.97	0	2.5GY 6/1	Olive grey	21	18.9	2.1	20.3	6	3.9	21.9	19.2	2.7	-0.9	-4.10959	-0.3	-1.5625	-0.6
September 9th	Cold	Cloudy	15	2	8	240	Lower	Soft	Fossiliferous sandstone	4	32	Intermediate	7.9	536	0.91	0	2.5Y 7/4	Light yellow	19.6	17.5	2.1	18.8	4.6	2.5	20.1	18	2.1	-0.5	-2.48756	-0.5	-2.77778	0
September 9th	Cold	Cloudy	15	2	8	300	Upper	Hard	Purple siltstone	1	3	Intermediate	11.6	424	0.91	0	10R 5/1	Reddish grey	24.9	22	2.9	23.7	9.9	7	23.8	20.8	3	1.1	4.62185	1.2	5.76923	-0.1
September 9th	Cold	Cloudy	15	2	8	300	Upper	Soft	Orange limestone	5	21	Thick	12.4	676	0.88	1	2.5Y 8/4	Pale yellow	20.8	17.4	3.4	19.4	5.8	2.4	19.8	17	2.8	1	5.05051	0.4	2.35294	0.6
September 9th	Cold	Cloudy	15	2	8	300	Upper	Hard	Quartzite	3	25	Thin	9.6	636	0.87	0	10YR 6/2	Greyish yellow brown	21.7	18.9	2.8	20.4	6.7	3.9	20.9	17.1	3.8	0.8	3.82775	1.8	10.5263	-1
September 9th	Cold	Cloudy	15	2	8	300	Upper	Soft	Fossiliferous sandstone	4	33	Intermediate	8.6	672	0.85	0	2.5Y 6/4	Dull yellow	20.7	17.8	2.9	19.9	5.7	2.8	20.8	17.1	3.7	-0.1	-0.480769	0.7	4.09357	-0.8
September 9th	Cold	Cloudy	15	2	8	300	Upper	Hard	Grey siltstone	2	12	Thin	7.5	580	0.95	0	N 6/0	Grey	23.4	21.4	2	22.5	8.4	6.4	22.5	19.9	2.6	0.9	4	1.5	7.53769	-0.6
September 9th	Cold	Cloudy	15	2	8	300	Upper	Soft	Orange limestone	5	20	Thick	11.7	356	0.92	0	10YR 8/3	Light yellow	19.8	16.9	2.9	18.9	4.8	1.9	20.2	16.8	3.4	-0.4	-1.9802	0.1	0.595238	-0.5
September 9th	Cold	Cloudy	15	2	8	300	Upper	Hard	Quartzite	3	29	Thick	14.1	400	0.94	1	10YR 7/2	Greyish yellow brown	20.2	17.4	2.8	19.1	5.2	2.4	19.4	16.9	2.5	0.8	4.12371	0.5	2.95858	0.3
September 9th	Cold	Cloudy	15	2	8	300	Upper	Soft	White limestone	6	16	Thick	12.3	460	0.94	1	2.5Y 8/1	Light grey	19	16.6	2.4	18.4	4	1.6	19.6	16.7	2.9	-0.6	-3.06122	-0.1	-0.598802	-0.5
September 9th	Cold	Cloudy	15	2	8	300	Upper	Hard	Grey siltstone	2	9	Thick	12.6	624	0.92	0	2.5GY 7/1	Light olive grey	22.9	19.9	3	21.6	7.9	4.9	23	19.7	3.3	-0.1	-0.434783	0.2	1.01523	-0.3
September 9th	Cold	Cloudy	15	2	8	300	Upper	Hard	Quartzite	3	30	Thick	14.3	376	0.96	0	10YR 8/1	Light grey	18.4	16.2	2.2	18.1	3.4	1.2	18.5	15.5	3	-0.1	-0.540541	0.7	4.51613	-0.8
September 9th	Cold	Cloudy	15	2	8	300	Upper	Hard	Purple siltstone	1	4	Thin	6.4	608	0.94	0	10R 6/1	Reddish grey	20.4	18.8	1.6	20.2	5.4	3.8	21.5	18.6	2.9	-1.1	-5.11628	0.2	1.07527	-1.3
September 9th	Cold	Cloudy	15	2	8	300	Upper	Soft	Fossiliferous sandstone	4	36	Thin	7.5	732	0.86	0	2.5Y 7/4	Light yellow	20.3	17.7	2.6	18.8	5.3	2.7	20.5	17.1	3.4	-0.2	-0.97561	0.6	3.50877	-0.8
September 9th	Cold	Cloudy	15	2	8	300	Upper	Soft	Fossiliferous sandstone	4	31	Thin	6.9	588	0.94	0	2.5Y 7/6	Yellowish brown	20.4	17.2	3.2	19.6	5.4	2.2	20.3	17.2	3.1	0.1	0.492611	0	0	0.1
September 9th	Cold	Cloudy	15	2	8	300	Upper	Soft	White limestone	6	15	Thin	5.9	612	0.82	1	2.5Y 8/1	Light grey	19.3	15.4	3.9	17.7	4.3	0.4	19.6	15.6	4	-0.3	-1.53061	-0.2	-1.28205	-0.1
September 9th	Cold	Cloudy	15	2	8	300	Upper	Soft	Orange limestone	5	22	Intermediate	7.6	632	0.94	0	2.5Y 7/4	Light yellow	20	16.8	3.2	19	5	1.8	21	17	4	-1	-4.7619	-0.2	-1.17647	-0.8
September 9th	Cold	Cloudy	15	2	8	300	Upper	Hard	Grey siltstone	2	7	Thick	12.3	436	0.94	0	N 7/0	Greyish white	20.9	18.1	2.8	20.2	5.9	3.1	21.4	17.2	4.2	-0.5	-2.33645	0.9	5.23256	-1.4
September 9th	Cold	Cloudy	15	2	8	300	Upper	Soft	Orange limestone	5	23	Thin	6.1	808	0.91	0	5Y 8/3	Pale yellow	18.5	15.8	2.7	18	3.5	0.8	19.7	16.8	2.9	-1.2	-6.09137	-1	-5.95238	-0.2
September 9th	Cold	Cloudy	15	2	8	300	Upper	Hard	Purple siltstone	1	2	Thick	14.3	484	0.97	0	7.5YR 5/1	Brownish grey	21.7	17.6	4.1	20.6	6.7	2.6	22.3	19.5	2.8	-0.6	-2.69058	-1.9	-9.74359	1.3
September 9th	Cold	Cloudy	15	2	8	300	Upper	Soft	White limestone	6	13	Intermediate	9.4	592	0.91	2	2.5Y 8/1	Light grey	17.3	14.8	2.5	16.4	2.3	-0.2	18.6	15.8	2.8	-1.3	-6.98925	-1	-6.32911	-0.3
September 9th	Cold	Cloudy	15	2	8	300	Upper	Hard	Grey siltstone	2	11	Thin	7.3	688	0.94	0	N 7/0	Greyish white	20.9	18	2.9	19.9	5.9	3	21.9	19.1	2.8	-1	-4.56621	-1.1	-5.75916	0.1
September 9th	Cold	Cloudy	15	2	8	300	Upper	Hard	Purple siltstone	1	1	Intermediate	11.2	384	0.92	0	2.5YR 5/1	Reddish grey	21.9	18.7	3.2	21	6.9	3.7	22.5	19.3	3.2	-0.6	-2.66667	-0.6	-3.10881	0
September 9th	Cold	Cloudy	15	2	8	300	Upper	Hard	Grey siltstone	2	10	Intermediate	8.4	552	0.94	0	2.5GY 7/1	Light olive grey	20.7	17.8	2.9	19.8	5.7	2.8	21.6	18.7	2.9	-0.9	-4.16667	-0.9	-4.81283	-3.55271e-15
September 9th	Cold	Cloudy	15	2	8	300	Upper	Soft	Orange limestone	5	19	Intermediate	6.8	604	0.94	0	2.5Y 6/4	Dull yellow	19.6	15.7	3.9	18	4.6	0.7	20.5	17.1	3.4	-0.9	-4.39024	-1.4	-8.18713	0.5
September 9th	Cold	Cloudy	15	2	8	300	Upper	Soft	White limestone	6	14	Thin	6.5	830	0.97	4	2.5Y 8/1	Light grey	18.2	14.5	3.7	17.1	3.2	-0.5	19.4	16.1	3.3	-1.2	-6.18557	-1.6	-9.93789	0.4
September 9th	Cold	Cloudy	15	2	8	300	Upper	Soft	Fossiliferous sandstone	4	35	Thick	15	704	0.91	0	2.5Y 5/6	Yellowish brown	20.1	17.3	2.8	18.8	5.1	2.3	21.8	18.5	3.3	-1.7	-7.79817	-1.2	-6.48649	-0.5
September 9th	Cold	Cloudy	15	2	8	300	Upper	Hard	Purple siltstone	1	5	Thin	6.5	508	0.92	0	10R 6/1	Reddish grey	20.8	17.8	3	20	5.8	2.8	21.7	18.1	3.6	-0.9	-4.14747	-0.3	-1.65746	-0.6
September 9th	Cold	Cloudy	15	2	8	300	Upper	Hard	Quartzite	3	28	Intermediate	12.6	328	0.95	0	10YR 8/1	Light grey	16.9	14.3	2.6	16	1.9	-0.7	18.9	16.4	2.5	-2	-10.582	-2.1	-12.8049	0.1
September 9th	Cold	Cloudy	15	2	8	300	Upper	Soft	Orange limestone	5	24	Thin	6	620	0.94	0	2.5Y 7/4	Light yellow	18.8	15.9	2.9	17.4	3.8	0.9	20.3	17.2	3.1	-1.5	-7.38916	-1.3	-7.55814	-0.2
September 9th	Cold	Cloudy	15	2	8	300	Upper	Hard	Quartzite	3	27	Intermediate	11.1	444	0.94	0	10YR 8/1	Light grey	17.6	15.4	2.2	16.5	2.6	0.4	18.2	15.8	2.4	-0.6	-3.2967	-0.4	-2.53165	-0.2
September 9th	Cold	Cloudy	15	2	8	300	Upper	Soft	White limestone	6	18	Thick	12	544	0.85	1	2.5Y 8/1	Light grey	18.1	15.2	2.9	16.2	3.1	0.2	19.1	16	3.1	-1	-5.2356	-0.8	-5	-0.2
September 9th	Cold	Cloudy	15	2	8	300	Upper	Soft	Fossiliferous sandstone	4	34	Thick	13.9	436	0.76	0	2.5Y 7/4	Light yellow	19.2	15.3	3.9	18.6	4.2	0.3	20.9	16.6	4.3	-1.7	-8.13397	-1.3	-7.83133	-0.4
September 9th	Cold	Cloudy	15	2	8	300	Upper	Hard	Purple siltstone	1	6	Thick	13.5	596	0.94	0	7.5R 5/1	Reddish grey	21.8	18.3	3.5	21.1	6.8	3.3	23	18.8	4.2	-1.2	-5.21739	-0.5	-2.65957	-0.7
September 9th	Cold	Cloudy	15	2	8	300	Upper	Hard	Quartzite	3	26	Thin	7.9	500	0.97	0	10YR 7/2	Greyish yellow brown	18.9	16.6	2.3	17.6	3.9	1.6	19.9	16.6	3.3	-1	-5.02513	0	0	-1
September 9th	Cold	Cloudy	15	2	8	300	Upper	Soft	White limestone	6	17	Intermediate	9.5	444	0.95	0	2.5Y 8/1	Light grey	18.1	15	3.1	16.5	3.1	0	19.2	16.1	3.1	-1.1	-5.72917	-1.1	-6.8323	3.55271e-15
September 9th	Cold	Cloudy	15	2	8	300	Upper	Hard	Grey siltstone	2	8	Intermediate	8.1	592	0.97	0	2.5GY 6/1	Olive grey	20.8	17.5	3.3	19.9	5.8	2.5	21.7	18.3	3.4	-0.9	-4.14747	-0.8	-4.37158	-0.1
September 9th	Cold	Cloudy	15	2	8	300	Upper	Soft	Fossiliferous sandstone	4	32	Intermediate	7.9	524	0.92	0	2.5Y 7/4	Light yellow	19.7	16	3.7	18.4	4.7	1	20.2	17.8	2.4	-0.5	-2.47525	-1.8	-10.1124	1.3
September 9th	Cold	Cloudy	15	2	8	300	Lower	Hard	Purple siltstone	1	3	Intermediate	11.6	354	0.91	0	10R 5/1	Reddish grey	20.6	16.8	3.8	18.6	5.6	1.8	21.2	18	3.2	-0.6	-2.83019	-1.2	-6.66667	0.6
September 9th	Cold	Cloudy	15	2	8	300	Lower	Soft	Orange limestone	5	21	Thick	12.4	608	0.91	0	2.5Y 8/4	Pale yellow	17.2	14.2	3	15.3	2.2	-0.8	17.1	14.4	2.7	0.1	0.584795	-0.2	-1.38889	0.3
September 9th	Cold	Cloudy	15	2	8	300	Lower	Hard	Quartzite	3	25	Thin	9.6	584	0.92	0	10YR 6/2	Greyish yellow brown	19.9	16.2	3.7	17.9	4.9	1.2	20.7	16.7	4	-0.8	-3.86473	-0.5	-2.99401	-0.3
September 9th	Cold	Cloudy	15	2	8	300	Lower	Soft	Fossiliferous sandstone	4	33	Intermediate	8.6	680	0.91	0	2.5Y 6/4	Dull yellow	18.8	16.3	2.5	17.1	3.8	1.3	19.4	16.5	2.9	-0.6	-3.09278	-0.2	-1.21212	-0.4
September 9th	Cold	Cloudy	15	2	8	300	Lower	Hard	Grey siltstone	2	12	Thin	7.5	576	0.94	0	N 6/0	Grey	21.9	19.1	2.8	19.8	6.9	4.1	23.3	19.5	3.8	-1.4	-6.00858	-0.4	-2.05128	-1
September 9th	Cold	Cloudy	15	2	8	300	Lower	Soft	Orange limestone	5	20	Thick	11.7	420	0.97	0	10YR 8/3	Light yellow	17.8	15.8	2	16.5	2.8	0.8	19	16.3	2.7	-1.2	-6.31579	-0.5	-3.06748	-0.7
September 9th	Cold	Cloudy	15	2	8	300	Lower	Hard	Quartzite	3	29	Thick	14.1	368	0.94	0	10YR 7/2	Greyish yellow brown	19.4	17.6	1.8	18.1	4.4	2.6	19.3	17.6	1.7	0.1	0.518135	0	0	0.1
September 9th	Cold	Cloudy	15	2	8	300	Lower	Soft	White limestone	6	16	Thick	12.3	412	0.94	0	2.5Y 8/1	Light grey	18.7	16.3	2.4	17	3.7	1.3	18.6	16.2	2.4	0.1	0.537634	0.1	0.617284	-3.55271e-15
September 9th	Cold	Cloudy	15	2	8	300	Lower	Hard	Grey siltstone	2	9	Thick	12.6	532	0.97	0	2.5GY 7/1	Light olive grey	21.8	19.1	2.7	20.3	6.8	4.1	22.4	19.6	2.8	-0.6	-2.67857	-0.5	-2.55102	-0.1
September 9th	Cold	Cloudy	15	2	8	300	Lower	Hard	Quartzite	3	30	Thick	14.3	588	0.9	0	10YR 8/1	Light grey	20.2	17	3.2	18.2	5.2	2	19.3	16.6	2.7	0.9	4.66321	0.4	2.40964	0.5
September 9th	Cold	Cloudy	15	2	8	300	Lower	Hard	Purple siltstone	1	4	Thin	6.4	608	0.95	0	10R 6/1	Reddish grey	22.1	18.9	3.2	19.8	7.1	3.9	23	19.7	3.3	-0.9	-3.91304	-0.8	-4.06091	-0.1
September 9th	Cold	Cloudy	15	2	8	300	Lower	Soft	Fossiliferous sandstone	4	36	Thin	7.5	742	0.88	1	2.5Y 7/4	Light yellow	21	17.2	3.8	18.7	6	2.2	21.3	17.7	3.6	-0.3	-1.40845	-0.5	-2.82486	0.2
September 9th	Cold	Cloudy	15	2	8	300	Lower	Soft	Fossiliferous sandstone	4	31	Thin	6.9	580	0.94	0	2.5Y 7/6	Yellowish brown	20.6	17.3	3.3	18.5	5.6	2.3	20.7	17.8	2.9	-0.1	-0.483092	-0.5	-2.80899	0.4
September 9th	Cold	Cloudy	15	2	8	300	Lower	Soft	White limestone	6	15	Thin	5.9	564	0.92	2	2.5Y 8/1	Light grey	19.7	16.8	2.9	17.9	4.7	1.8	20.7	17	3.7	-1	-4.83092	-0.2	-1.17647	-0.8
September 9th	Cold	Cloudy	15	2	8	300	Lower	Soft	Orange limestone	5	22	Intermediate	7.6	584	0.94	0	2.5Y 7/4	Light yellow	20	17.4	2.6	18.1	5	2.4	21.4	17.3	4.1	-1.4	-6.54206	0.1	0.578035	-1.5
September 9th	Cold	Cloudy	15	2	8	300	Lower	Hard	Grey siltstone	2	7	Thick	12.3	544	0.95	0	N 7/0	Greyish white	21.3	18.9	2.4	19.6	6.3	3.9	21.2	18.7	2.5	0.1	0.471698	0.2	1.06952	-0.1
September 9th	Cold	Cloudy	15	2	8	300	Lower	Soft	Orange limestone	5	23	Thin	6.1	792	0.94	0	5Y 8/3	Pale yellow	19.7	17.3	2.4	17.9	4.7	2.3	20.9	18	2.9	-1.2	-5.74163	-0.7	-3.88889	-0.5
September 9th	Cold	Cloudy	15	2	8	300	Lower	Hard	Purple siltstone	1	2	Thick	14.3	456	0.94	0	7.5YR 5/1	Brownish grey	21.7	19.4	2.3	19.9	6.7	4.4	21.4	19.3	2.1	0.3	1.40187	0.1	0.518135	0.2
September 9th	Cold	Cloudy	15	2	8	300	Lower	Soft	White limestone	6	13	Intermediate	9.4	492	0.91	2	2.5Y 8/1	Light grey	19.4	16.2	3.2	18.2	4.4	1.2	20.3	16.4	3.9	-0.9	-4.4335	-0.2	-1.21951	-0.7
September 9th	Cold	Cloudy	15	2	8	300	Lower	Hard	Grey siltstone	2	11	Thin	7.3	696	0.92	0	N 7/0	Greyish white	22.5	19.5	3	19.9	7.5	4.5	22.2	19.3	2.9	0.3	1.35135	0.2	1.03627	0.1
September 9th	Cold	Cloudy	15	2	8	300	Lower	Hard	Purple siltstone	1	1	Intermediate	11.2	408	0.94	0	2.5YR 5/1	Reddish grey	22.9	20.3	2.6	21.1	7.9	5.3	23.4	19.8	3.6	-0.5	-2.13675	0.5	2.52525	-1
September 9th	Cold	Cloudy	15	2	8	300	Lower	Hard	Grey siltstone	2	10	Intermediate	8.4	556	0.94	0	2.5GY 7/1	Light olive grey	22.2	19.9	2.3	20.5	7.2	4.9	21.9	19.2	2.7	0.3	1.36986	0.7	3.64583	-0.4
September 9th	Cold	Cloudy	15	2	8	300	Lower	Soft	Orange limestone	5	19	Intermediate	6.8	528	0.92	0	2.5Y 6/4	Dull yellow	20.9	17.7	3.2	18.4	5.9	2.7	21	17.6	3.4	-0.1	-0.47619	0.1	0.568182	-0.2
September 9th	Cold	Cloudy	15	2	8	300	Lower	Soft	White limestone	6	14	Thin	6.5	816	0.95	2	2.5Y 8/1	Light grey	19.5	17.1	2.4	18	4.5	2.1	19.9	16.9	3	-0.4	-2.01005	0.2	1.18343	-0.6
September 9th	Cold	Cloudy	15	2	8	300	Lower	Soft	Fossiliferous sandstone	4	35	Thick	15	664	0.91	1	2.5Y 5/6	Yellowish brown	20.5	17.3	3.2	18.7	5.5	2.3	20.1	16.6	3.5	0.4	1.99005	0.7	4.21687	-0.3
September 9th	Cold	Cloudy	15	2	8	300	Lower	Hard	Purple siltstone	1	5	Thin	6.5	496	0.97	0	10R 6/1	Reddish grey	22.1	20.2	1.9	21	7.1	5.2	21.5	18.7	2.8	0.6	2.7907	1.5	8.02139	-0.9
September 9th	Cold	Cloudy	15	2	8	300	Lower	Hard	Quartzite	3	28	Intermediate	12.6	464	0.92	0	10YR 8/1	Light grey	19.3	16.9	2.4	18	4.3	1.9	19.1	17.4	1.7	0.2	1.04712	-0.5	-2.87356	0.7
September 9th	Cold	Cloudy	15	2	8	300	Lower	Soft	Orange limestone	5	24	Thin	6	588	0.94	1	2.5Y 7/4	Light yellow	19.9	17.1	2.8	18.5	4.9	2.1	20	16.9	3.1	-0.1	-0.5	0.2	1.18343	-0.3
September 9th	Cold	Cloudy	15	2	8	300	Lower	Hard	Quartzite	3	27	Intermediate	11.1	448	0.94	0	10YR 8/1	Light grey	19.5	17.2	2.3	18.5	4.5	2.2	19.2	16.7	2.5	0.3	1.5625	0.5	2.99401	-0.2
September 9th	Cold	Cloudy	15	2	8	300	Lower	Soft	White limestone	6	18	Thick	12	504	0.81	0	2.5Y 8/1	Light grey	18.7	15.6	3.1	17	3.7	0.6	19	15.8	3.2	-0.3	-1.57895	-0.2	-1.26582	-0.1
September 9th	Cold	Cloudy	15	2	8	300	Lower	Soft	Fossiliferous sandstone	4	34	Thick	13.9	520	0.95	0	2.5Y 7/4	Light yellow	20.2	16.6	3.6	18.4	5.2	1.6	19.1	16.7	2.4	1.1	5.75916	-0.1	-0.598802	1.2
September 9th	Cold	Cloudy	15	2	8	300	Lower	Hard	Purple siltstone	1	6	Thick	13.5	516	1	0	7.5R 5/1	Reddish grey	21.5	19.2	2.3	20	6.5	4.2	20.8	18.7	2.1	0.7	3.36538	0.5	2.6738	0.2
September 9th	Cold	Cloudy	15	2	8	300	Lower	Hard	Quartzite	3	26	Thin	7.9	496	0.94	0	10YR 7/2	Greyish yellow brown	20.4	17.9	2.5	19.4	5.4	2.9	20.2	17.2	3	0.2	0.990099	0.7	4.06977	-0.5
September 9th	Cold	Cloudy	15	2	8	300	Lower	Soft	White limestone	6	17	Intermediate	9.5	448	0.92	1	2.5Y 8/1	Light grey	18.8	16.6	2.2	17.8	3.8	1.6	18.6	16.3	2.3	0.2	1.07527	0.3	1.84049	-0.1
September 9th	Cold	Cloudy	15	2	8	300	Lower	Hard	Grey siltstone	2	8	Intermediate	8.1	584	0.97	0	2.5GY 6/1	Olive grey	21.3	19.3	2	20.5	6.3	4.3	21	18.9	2.1	0.3	1.42857	0.4	2.1164	-0.1
September 9th	Cold	Cloudy	15	2	8	300	Lower	Soft	Fossiliferous sandstone	4	32	Intermediate	7.9	536	0.91	0	2.5Y 7/4	Light yellow	19.8	17.6	2.2	19.2	4.8	2.6	19.6	17.5	2.1	0.2	1.02041	0.1	0.571429	0.1
September 10th	Cold	Mild	11	3	2	0	Upper	Hard	Purple siltstone	1	3	Intermediate	11.6	424	0.91	0	10R 5/1	Reddish grey	14.6	10.7	3.9	11.8	3.6	-0.3
September 10th	Cold	Mild	11	3	2	0	Upper	Soft	Orange limestone	5	21	Thick	12.4	676	0.88	1	2.5Y 8/4	Pale yellow	15.1	9.9	5.2	11.6	4.1	-1.1
September 10th	Cold	Mild	11	3	2	0	Upper	Hard	Quartzite	3	25	Thin	9.6	636	0.87	0	10YR 6/2	Greyish yellow brown	12.8	8.2	4.6	11.4	1.8	-2.8
September 10th	Cold	Mild	11	3	2	0	Upper	Soft	Fossiliferous sandstone	4	33	Intermediate	8.6	672	0.85	0	2.5Y 6/4	Dull yellow	13.7	9.2	4.5	10.4	2.7	-1.8
September 10th	Cold	Mild	11	3	2	0	Upper	Hard	Grey siltstone	2	12	Thin	7.5	580	0.95	0	N 6/0	Grey	14.6	11	3.6	11.9	3.6	0
September 10th	Cold	Mild	11	3	2	0	Upper	Soft	Orange limestone	5	20	Thick	11.7	356	0.92	0	10YR 8/3	Light yellow	14.9	9.5	5.4	11.8	3.9	-1.5
September 10th	Cold	Mild	11	3	2	0	Upper	Hard	Quartzite	3	29	Thick	14.1	400	0.94	1	10YR 7/2	Greyish yellow brown	13.6	8.7	4.9	10.1	2.6	-2.3
September 10th	Cold	Mild	11	3	2	0	Upper	Soft	White limestone	6	16	Thick	12.3	460	0.94	1	2.5Y 8/1	Light grey	15.5	8.4	7.1	11	4.5	-2.6
September 10th	Cold	Mild	11	3	2	0	Upper	Hard	Grey siltstone	2	9	Thick	12.6	624	0.92	0	2.5GY 7/1	Light olive grey	14.7	9.2	5.5	11.3	3.7	-1.8
September 10th	Cold	Mild	11	3	2	0	Upper	Hard	Quartzite	3	30	Thick	14.3	376	0.96	0	10YR 8/1	Light grey	12.7	8.3	4.4	9.9	1.7	-2.7
September 10th	Cold	Mild	11	3	2	0	Upper	Hard	Purple siltstone	1	4	Thin	6.4	608	0.94	0	10R 6/1	Reddish grey	13.6	9	4.6	10.3	2.6	-2
September 10th	Cold	Mild	11	3	2	0	Upper	Soft	Fossiliferous sandstone	4	36	Thin	7.5	732	0.86	0	2.5Y 7/4	Light yellow	14	7.7	6.3	10.8	3	-3.3
September 10th	Cold	Mild	11	3	2	0	Upper	Soft	Fossiliferous sandstone	4	31	Thin	6.9	588	0.94	0	2.5Y 7/6	Yellowish brown	14.2	9.5	4.7	11.4	3.2	-1.5
September 10th	Cold	Mild	11	3	2	0	Upper	Soft	White limestone	6	15	Thin	5.9	612	0.82	1	2.5Y 8/1	Light grey	13.1	8.8	4.3	12.3	2.1	-2.2
September 10th	Cold	Mild	11	3	2	0	Upper	Soft	Orange limestone	5	22	Intermediate	7.6	632	0.94	0	2.5Y 7/4	Light yellow	14.5	9	5.5	11.6	3.5	-2
September 10th	Cold	Mild	11	3	2	0	Upper	Hard	Grey siltstone	2	7	Thick	12.3	436	0.94	0	N 7/0	Greyish white	14.2	8.7	5.5	12.2	3.2	-2.3
September 10th	Cold	Mild	11	3	2	0	Upper	Soft	Orange limestone	5	23	Thin	6.1	808	0.91	0	5Y 8/3	Pale yellow	14.5	9.4	5.1	11.6	3.5	-1.6
September 10th	Cold	Mild	11	3	2	0	Upper	Hard	Purple siltstone	1	2	Thick	14.3	484	0.97	0	7.5YR 5/1	Brownish grey	14.5	8	6.5	10.9	3.5	-3
September 10th	Cold	Mild	11	3	2	0	Upper	Soft	White limestone	6	13	Intermediate	9.4	592	0.91	2	2.5Y 8/1	Light grey	13.3	7.4	5.9	10.4	2.3	-3.6
September 10th	Cold	Mild	11	3	2	0	Upper	Hard	Grey siltstone	2	11	Thin	7.3	688	0.94	0	N 7/0	Greyish white	13.6	9.2	4.4	11	2.6	-1.8
September 10th	Cold	Mild	11	3	2	0	Upper	Hard	Purple siltstone	1	1	Intermediate	11.2	384	0.92	0	2.5YR 5/1	Reddish grey	12.9	8.6	4.3	11.1	1.9	-2.4
September 10th	Cold	Mild	11	3	2	0	Upper	Hard	Grey siltstone	2	10	Intermediate	8.4	552	0.94	0	2.5GY 7/1	Light olive grey	13.1	8.9	4.2	10.9	2.1	-2.1
September 10th	Cold	Mild	11	3	2	0	Upper	Soft	Orange limestone	5	19	Intermediate	6.8	604	0.94	0	2.5Y 6/4	Dull yellow	13.7	8.2	5.5	10	2.7	-2.8
September 10th	Cold	Mild	11	3	2	0	Upper	Soft	White limestone	6	14	Thin	6.5	830	0.97	4	2.5Y 8/1	Light grey	13.5	7.4	6.1	10	2.5	-3.6
September 10th	Cold	Mild	11	3	2	0	Upper	Soft	Fossiliferous sandstone	4	35	Thick	15	704	0.91	0	2.5Y 5/6	Yellowish brown	14.1	8.4	5.7	10.2	3.1	-2.6
September 10th	Cold	Mild	11	3	2	0	Upper	Hard	Purple siltstone	1	5	Thin	6.5	508	0.92	0	10R 6/1	Reddish grey	13.2	8.2	5	11	2.2	-2.8
September 10th	Cold	Mild	11	3	2	0	Upper	Hard	Quartzite	3	28	Intermediate	12.6	328	0.95	0	10YR 8/1	Light grey	11.4	7.9	3.5	9.7	0.4	-3.1
September 10th	Cold	Mild	11	3	2	0	Upper	Soft	Orange limestone	5	24	Thin	6	620	0.94	0	2.5Y 7/4	Light yellow	13.4	8.6	4.8	9.4	2.4	-2.4
September 10th	Cold	Mild	11	3	2	0	Upper	Hard	Quartzite	3	27	Intermediate	11.1	444	0.94	0	10YR 8/1	Light grey	10.7	7.3	3.4	9.4	-0.3	-3.7
September 10th	Cold	Mild	11	3	2	0	Upper	Soft	White limestone	6	18	Thick	12	544	0.85	1	2.5Y 8/1	Light grey	13	7.3	5.7	9.6	2	-3.7
September 10th	Cold	Mild	11	3	2	0	Upper	Soft	Fossiliferous sandstone	4	34	Thick	13.9	436	0.76	0	2.5Y 7/4	Light yellow	12.8	7	5.8	9.2	1.8	-4
September 10th	Cold	Mild	11	3	2	0	Upper	Hard	Purple siltstone	1	6	Thick	13.5	596	0.94	0	7.5R 5/1	Reddish grey	13.2	8.5	4.7	9.6	2.2	-2.5
September 10th	Cold	Mild	11	3	2	0	Upper	Hard	Quartzite	3	26	Thin	7.9	500	0.97	0	10YR 7/2	Greyish yellow brown	12.6	8.4	4.2	11	1.6	-2.6
September 10th	Cold	Mild	11	3	2	0	Upper	Soft	White limestone	6	17	Intermediate	9.5	444	0.95	0	2.5Y 8/1	Light grey	12.5	7.1	5.4	10.3	1.5	-3.9
September 10th	Cold	Mild	11	3	2	0	Upper	Hard	Grey siltstone	2	8	Intermediate	8.1	592	0.97	0	2.5GY 6/1	Olive grey	14.2	8.8	5.4	11.4	3.2	-2.2
September 10th	Cold	Mild	11	3	2	0	Upper	Soft	Fossiliferous sandstone	4	32	Intermediate	7.9	524	0.92	0	2.5Y 7/4	Light yellow	13.2	8.7	4.5	10.8	2.2	-2.3
September 10th	Cold	Mild	11	3	2	0	Lower	Hard	Purple siltstone	1	3	Intermediate	11.6	354	0.91	0	10R 5/1	Reddish grey	13.5	9.7	3.8	10.7	2.5	-1.3
September 10th	Cold	Mild	11	3	2	0	Lower	Soft	Orange limestone	5	21	Thick	12.4	608	0.91	0	2.5Y 8/4	Pale yellow	13.3	9.6	3.7	11.3	2.3	-1.4
September 10th	Cold	Mild	11	3	2	0	Lower	Hard	Quartzite	3	25	Thin	9.6	584	0.92	0	10YR 6/2	Greyish yellow brown	15.2	8	7.2	10.9	4.2	-3
September 10th	Cold	Mild	11	3	2	0	Lower	Soft	Fossiliferous sandstone	4	33	Intermediate	8.6	680	0.91	0	2.5Y 6/4	Dull yellow	14.7	10.1	4.6	12	3.7	-0.9
September 10th	Cold	Mild	11	3	2	0	Lower	Hard	Grey siltstone	2	12	Thin	7.5	576	0.94	0	N 6/0	Grey	15.6	11.3	4.3	12.1	4.6	0.3
September 10th	Cold	Mild	11	3	2	0	Lower	Soft	Orange limestone	5	20	Thick	11.7	420	0.97	0	10YR 8/3	Light yellow	14.5	10.6	3.9	11.8	3.5	-0.4
September 10th	Cold	Mild	11	3	2	0	Lower	Hard	Quartzite	3	29	Thick	14.1	368	0.94	0	10YR 7/2	Greyish yellow brown	13.8	9.2	4.6	12	2.8	-1.8
September 10th	Cold	Mild	11	3	2	0	Lower	Soft	White limestone	6	16	Thick	12.3	412	0.94	0	2.5Y 8/1	Light grey	15	9.7	5.3	11.8	4	-1.3
September 10th	Cold	Mild	11	3	2	0	Lower	Hard	Grey siltstone	2	9	Thick	12.6	532	0.97	0	2.5GY 7/1	Light olive grey	14.3	11	3.3	11.5	3.3	0
September 10th	Cold	Mild	11	3	2	0	Lower	Hard	Quartzite	3	30	Thick	14.3	588	0.9	0	10YR 8/1	Light grey	14.9	10.1	4.8	11.1	3.9	-0.9
September 10th	Cold	Mild	11	3	2	0	Lower	Hard	Purple siltstone	1	4	Thin	6.4	608	0.95	0	10R 6/1	Reddish grey	15.1	11.1	4	12.8	4.1	0.1
September 10th	Cold	Mild	11	3	2	0	Lower	Soft	Fossiliferous sandstone	4	36	Thin	7.5	742	0.88	1	2.5Y 7/4	Light yellow	15.3	11.1	4.2	13.1	4.3	0.1
September 10th	Cold	Mild	11	3	2	0	Lower	Soft	Fossiliferous sandstone	4	31	Thin	6.9	580	0.94	0	2.5Y 7/6	Yellowish brown	14.8	10.8	4	11.8	3.8	-0.2
September 10th	Cold	Mild	11	3	2	0	Lower	Soft	White limestone	6	15	Thin	5.9	564	0.92	2	2.5Y 8/1	Light grey	15.7	11.1	4.6	13	4.7	0.1
September 10th	Cold	Mild	11	3	2	0	Lower	Soft	Orange limestone	5	22	Intermediate	7.6	584	0.94	0	2.5Y 7/4	Light yellow	15.3	11	4.3	12.2	4.3	0
September 10th	Cold	Mild	11	3	2	0	Lower	Hard	Grey siltstone	2	7	Thick	12.3	544	0.95	0	N 7/0	Greyish white	14.3	10.5	3.8	12.3	3.3	-0.5
September 10th	Cold	Mild	11	3	2	0	Lower	Soft	Orange limestone	5	23	Thin	6.1	792	0.94	0	5Y 8/3	Pale yellow	16.6	10.9	5.7	12.9	5.6	-0.1
September 10th	Cold	Mild	11	3	2	0	Lower	Hard	Purple siltstone	1	2	Thick	14.3	456	0.94	0	7.5YR 5/1	Brownish grey	15.3	10.7	4.6	11.6	4.3	-0.3
September 10th	Cold	Mild	11	3	2	0	Lower	Soft	White limestone	6	13	Intermediate	9.4	492	0.91	2	2.5Y 8/1	Light grey	15.8	10.3	5.5	12.2	4.8	-0.7
September 10th	Cold	Mild	11	3	2	0	Lower	Hard	Grey siltstone	2	11	Thin	7.3	696	0.92	0	N 7/0	Greyish white	17	10.6	6.4	12.8	6	-0.4
September 10th	Cold	Mild	11	3	2	0	Lower	Hard	Purple siltstone	1	1	Intermediate	11.2	408	0.94	0	2.5YR 5/1	Reddish grey	17.8	10.7	7.1	12.5	6.8	-0.3
September 10th	Cold	Mild	11	3	2	0	Lower	Hard	Grey siltstone	2	10	Intermediate	8.4	556	0.94	0	2.5GY 7/1	Light olive grey	17.6	11.1	6.5	13.5	6.6	0.1
September 10th	Cold	Mild	11	3	2	0	Lower	Soft	Orange limestone	5	19	Intermediate	6.8	528	0.92	0	2.5Y 6/4	Dull yellow	17.6	11.3	6.3	12.4	6.6	0.3
September 10th	Cold	Mild	11	3	2	0	Lower	Soft	White limestone	6	14	Thin	6.5	816	0.95	2	2.5Y 8/1	Light grey	16.4	9.4	7	12.1	5.4	-1.6
September 10th	Cold	Mild	11	3	2	0	Lower	Soft	Fossiliferous sandstone	4	35	Thick	15	664	0.91	1	2.5Y 5/6	Yellowish brown	13.6	10.8	2.8	11.4	2.6	-0.2
September 10th	Cold	Mild	11	3	2	0	Lower	Hard	Purple siltstone	1	5	Thin	6.5	496	0.97	0	10R 6/1	Reddish grey	17.6	11.5	6.1	13.7	6.6	0.5
September 10th	Cold	Mild	11	3	2	0	Lower	Hard	Quartzite	3	28	Intermediate	12.6	464	0.92	0	10YR 8/1	Light grey	15.1	9.2	5.9	10.9	4.1	-1.8
September 10th	Cold	Mild	11	3	2	0	Lower	Soft	Orange limestone	5	24	Thin	6	588	0.94	1	2.5Y 7/4	Light yellow	14	10.5	3.5	12.1	3	-0.5
September 10th	Cold	Mild	11	3	2	0	Lower	Hard	Quartzite	3	27	Intermediate	11.1	448	0.94	0	10YR 8/1	Light grey	14.8	9.8	5	11.6	3.8	-1.2
September 10th	Cold	Mild	11	3	2	0	Lower	Soft	White limestone	6	18	Thick	12	504	0.81	0	2.5Y 8/1	Light grey	12.9	8.5	4.4	11.1	1.9	-2.5
September 10th	Cold	Mild	11	3	2	0	Lower	Soft	Fossiliferous sandstone	4	34	Thick	13.9	520	0.95	0	2.5Y 7/4	Light yellow	14.9	10.3	4.6	12.3	3.9	-0.7
September 10th	Cold	Mild	11	3	2	0	Lower	Hard	Purple siltstone	1	6	Thick	13.5	516	1	0	7.5R 5/1	Reddish grey	15.9	9.4	6.5	10.8	4.9	-1.6
September 10th	Cold	Mild	11	3	2	0	Lower	Hard	Quartzite	3	26	Thin	7.9	496	0.94	0	10YR 7/2	Greyish yellow brown	17.2	11.9	5.3	15.2	6.2	0.9
September 10th	Cold	Mild	11	3	2	0	Lower	Soft	White limestone	6	17	Intermediate	9.5	448	0.92	1	2.5Y 8/1	Light grey	14.9	10.6	4.3	12.4	3.9	-0.4
September 10th	Cold	Mild	11	3	2	0	Lower	Hard	Grey siltstone	2	8	Intermediate	8.1	584	0.97	0	2.5GY 6/1	Olive grey	16.6	11.5	5.1	13	5.6	0.5
September 10th	Cold	Mild	11	3	2	0	Lower	Soft	Fossiliferous sandstone	4	32	Intermediate	7.9	536	0.91	0	2.5Y 7/4	Light yellow	15.3	11.5	3.8	12.9	4.3	0.5
September 10th	Cold	Mild	12	3	1	60	Upper	Hard	Purple siltstone	1	3	Intermediate	11.6	424	0.91	0	10R 5/1	Reddish grey	23	12.6	10.4	17.5	11	0.6	14.6	10.7	3.9	8.4	57.5342	1.9	17.757	6.5
September 10th	Cold	Mild	12	3	1	60	Upper	Soft	Orange limestone	5	21	Thick	12.4	676	0.88	1	2.5Y 8/4	Pale yellow	20.8	12	8.8	14.2	8.8	0	15.1	9.9	5.2	5.7	37.7483	2.1	21.2121	3.6
September 10th	Cold	Mild	12	3	1	60	Upper	Hard	Quartzite	3	25	Thin	9.6	636	0.87	0	10YR 6/2	Greyish yellow brown	19.3	8.9	10.4	13.9	7.3	-3.1	12.8	8.2	4.6	6.5	50.7812	0.7	8.53659	5.8
September 10th	Cold	Mild	12	3	1	60	Upper	Soft	Fossiliferous sandstone	4	33	Intermediate	8.6	672	0.85	0	2.5Y 6/4	Dull yellow	24	11.4	12.6	14.8	12	-0.6	13.7	9.2	4.5	10.3	75.1825	2.2	23.913	8.1
September 10th	Cold	Mild	12	3	1	60	Upper	Hard	Grey siltstone	2	12	Thin	7.5	580	0.95	0	N 6/0	Grey	23.4	14.5	8.9	16.9	11.4	2.5	14.6	11	3.6	8.8	60.274	3.5	31.8182	5.3
September 10th	Cold	Mild	12	3	1	60	Upper	Soft	Orange limestone	5	20	Thick	11.7	356	0.92	0	10YR 8/3	Light yellow	20.3	12	8.3	16.2	8.3	0	14.9	9.5	5.4	5.4	36.2416	2.5	26.3158	2.9
September 10th	Cold	Mild	12	3	1	60	Upper	Hard	Quartzite	3	29	Thick	14.1	400	0.94	1	10YR 7/2	Greyish yellow brown	17.3	8.1	9.2	10.7	5.3	-3.9	13.6	8.7	4.9	3.7	27.2059	-0.6	-6.89655	4.3
September 10th	Cold	Mild	12	3	1	60	Upper	Soft	White limestone	6	16	Thick	12.3	460	0.94	1	2.5Y 8/1	Light grey	19.1	11.3	7.8	14.1	7.1	-0.7	15.5	8.4	7.1	3.6	23.2258	2.9	34.5238	0.7
September 10th	Cold	Mild	12	3	1	60	Upper	Hard	Grey siltstone	2	9	Thick	12.6	624	0.92	0	2.5GY 7/1	Light olive grey	22.6	11.2	11.4	16.4	10.6	-0.8	14.7	9.2	5.5	7.9	53.7415	2	21.7391	5.9
September 10th	Cold	Mild	12	3	1	60	Upper	Hard	Quartzite	3	30	Thick	14.3	376	0.96	0	10YR 8/1	Light grey	15.5	7.2	8.3	10.3	3.5	-4.8	12.7	8.3	4.4	2.8	22.0472	-1.1	-13.253	3.9
September 10th	Cold	Mild	12	3	1	60	Upper	Hard	Purple siltstone	1	4	Thin	6.4	608	0.94	0	10R 6/1	Reddish grey	19	11.3	7.7	14.7	7	-0.7	13.6	9	4.6	5.4	39.7059	2.3	25.5556	3.1
September 10th	Cold	Mild	12	3	1	60	Upper	Soft	Fossiliferous sandstone	4	36	Thin	7.5	732	0.86	0	2.5Y 7/4	Light yellow	21.4	9.5	11.9	15.6	9.4	-2.5	14	7.7	6.3	7.4	52.8571	1.8	23.3766	5.6
September 10th	Cold	Mild	12	3	1	60	Upper	Soft	Fossiliferous sandstone	4	31	Thin	6.9	588	0.94	0	2.5Y 7/6	Yellowish brown	21.3	10.5	10.8	15.1	9.3	-1.5	14.2	9.5	4.7	7.1	50	1	10.5263	6.1
September 10th	Cold	Mild	12	3	1	60	Upper	Soft	White limestone	6	15	Thin	5.9	612	0.82	1	2.5Y 8/1	Light grey	18.2	10.6	7.6	14.1	6.2	-1.4	13.1	8.8	4.3	5.1	38.9313	1.8	20.4545	3.3
September 10th	Cold	Mild	12	3	1	60	Upper	Soft	Orange limestone	5	22	Intermediate	7.6	632	0.94	0	2.5Y 7/4	Light yellow	21.3	11.3	10	16.1	9.3	-0.7	14.5	9	5.5	6.8	46.8966	2.3	25.5556	4.5
September 10th	Cold	Mild	12	3	1	60	Upper	Hard	Grey siltstone	2	7	Thick	12.3	436	0.94	0	N 7/0	Greyish white	21.3	9.5	11.8	15.7	9.3	-2.5	14.2	8.7	5.5	7.1	50	0.8	9.1954	6.3
September 10th	Cold	Mild	12	3	1	60	Upper	Soft	Orange limestone	5	23	Thin	6.1	808	0.91	0	5Y 8/3	Pale yellow	18.9	11.4	7.5	16	6.9	-0.6	14.5	9.4	5.1	4.4	30.3448	2	21.2766	2.4
September 10th	Cold	Mild	12	3	1	60	Upper	Hard	Purple siltstone	1	2	Thick	14.3	484	0.97	0	7.5YR 5/1	Brownish grey	23.7	12.4	11.3	16.6	11.7	0.4	14.5	8	6.5	9.2	63.4483	4.4	55	4.8
September 10th	Cold	Mild	12	3	1	60	Upper	Soft	White limestone	6	13	Intermediate	9.4	592	0.91	2	2.5Y 8/1	Light grey	18.5	8.4	10.1	13.2	6.5	-3.6	13.3	7.4	5.9	5.2	39.0977	1	13.5135	4.2
September 10th	Cold	Mild	12	3	1	60	Upper	Hard	Grey siltstone	2	11	Thin	7.3	688	0.94	0	N 7/0	Greyish white	22.6	13	9.6	18.6	10.6	1	13.6	9.2	4.4	9	66.1765	3.8	41.3043	5.2
September 10th	Cold	Mild	12	3	1	60	Upper	Hard	Purple siltstone	1	1	Intermediate	11.2	384	0.92	0	2.5YR 5/1	Reddish grey	22.7	13.2	9.5	18.1	10.7	1.2	12.9	8.6	4.3	9.8	75.969	4.6	53.4884	5.2
September 10th	Cold	Mild	12	3	1	60	Upper	Hard	Grey siltstone	2	10	Intermediate	8.4	552	0.94	0	2.5GY 7/1	Light olive grey	21.3	12.3	9	16.3	9.3	0.3	13.1	8.9	4.2	8.2	62.5954	3.4	38.2022	4.8
September 10th	Cold	Mild	12	3	1	60	Upper	Soft	Orange limestone	5	19	Intermediate	6.8	604	0.94	0	2.5Y 6/4	Dull yellow	21.3	11.3	10	14.8	9.3	-0.7	13.7	8.2	5.5	7.6	55.4745	3.1	37.8049	4.5
September 10th	Cold	Mild	12	3	1	60	Upper	Soft	White limestone	6	14	Thin	6.5	830	0.97	4	2.5Y 8/1	Light grey	19.6	10.2	9.4	13.4	7.6	-1.8	13.5	7.4	6.1	6.1	45.1852	2.8	37.8378	3.3
September 10th	Cold	Mild	12	3	1	60	Upper	Soft	Fossiliferous sandstone	4	35	Thick	15	704	0.91	0	2.5Y 5/6	Yellowish brown	23.7	13	10.7	17.4	11.7	1	14.1	8.4	5.7	9.6	68.0851	4.6	54.7619	5
September 10th	Cold	Mild	12	3	1	60	Upper	Hard	Purple siltstone	1	5	Thin	6.5	508	0.92	0	10R 6/1	Reddish grey	23.3	11.3	12	16.7	11.3	-0.7	13.2	8.2	5	10.1	76.5152	3.1	37.8049	7
September 10th	Cold	Mild	12	3	1	60	Upper	Hard	Quartzite	3	28	Intermediate	12.6	328	0.95	0	10YR 8/1	Light grey	16	8.4	7.6	12.1	4	-3.6	11.4	7.9	3.5	4.6	40.3509	0.5	6.32911	4.1
September 10th	Cold	Mild	12	3	1	60	Upper	Soft	Orange limestone	5	24	Thin	6	620	0.94	0	2.5Y 7/4	Light yellow	19.8	11.3	8.5	13.5	7.8	-0.7	13.4	8.6	4.8	6.4	47.7612	2.7	31.3953	3.7
September 10th	Cold	Mild	12	3	1	60	Upper	Hard	Quartzite	3	27	Intermediate	11.1	444	0.94	0	10YR 8/1	Light grey	13.8	7.6	6.2	10.7	1.8	-4.4	10.7	7.3	3.4	3.1	28.972	0.3	4.10959	2.8
September 10th	Cold	Mild	12	3	1	60	Upper	Soft	White limestone	6	18	Thick	12	544	0.85	1	2.5Y 8/1	Light grey	18.7	8.9	9.8	12.5	6.7	-3.1	13	7.3	5.7	5.7	43.8462	1.6	21.9178	4.1
September 10th	Cold	Mild	12	3	1	60	Upper	Soft	Fossiliferous sandstone	4	34	Thick	13.9	436	0.76	0	2.5Y 7/4	Light yellow	19.4	9.6	9.8	14.8	7.4	-2.4	12.8	7	5.8	6.6	51.5625	2.6	37.1429	4
September 10th	Cold	Mild	12	3	1	60	Upper	Hard	Purple siltstone	1	6	Thick	13.5	596	0.94	0	7.5R 5/1	Reddish grey	21.7	12	9.7	17.2	9.7	0	13.2	8.5	4.7	8.5	64.3939	3.5	41.1765	5
September 10th	Cold	Mild	12	3	1	60	Upper	Hard	Quartzite	3	26	Thin	7.9	500	0.97	0	10YR 7/2	Greyish yellow brown	17	9.7	7.3	13.8	5	-2.3	12.6	8.4	4.2	4.4	34.9206	1.3	15.4762	3.1
September 10th	Cold	Mild	12	3	1	60	Upper	Soft	White limestone	6	17	Intermediate	9.5	444	0.95	0	2.5Y 8/1	Light grey	17	9.1	7.9	13.2	5	-2.9	12.5	7.1	5.4	4.5	36	2	28.169	2.5
September 10th	Cold	Mild	12	3	1	60	Upper	Hard	Grey siltstone	2	8	Intermediate	8.1	592	0.97	0	2.5GY 6/1	Olive grey	21.2	11.1	10.1	15.6	9.2	-0.9	14.2	8.8	5.4	7	49.2958	2.3	26.1364	4.7
September 10th	Cold	Mild	12	3	1	60	Upper	Soft	Fossiliferous sandstone	4	32	Intermediate	7.9	524	0.92	0	2.5Y 7/4	Light yellow	19.9	11	8.9	14.5	7.9	-1	13.2	8.7	4.5	6.7	50.7576	2.3	26.4368	4.4
September 10th	Cold	Mild	12	3	1	60	Lower	Hard	Purple siltstone	1	3	Intermediate	11.6	354	0.91	0	10R 5/1	Reddish grey	17.5	9.8	7.7	12.8	5.5	-2.2	13.5	9.7	3.8	4	29.6296	0.1	1.03093	3.9
September 10th	Cold	Mild	12	3	1	60	Lower	Soft	Orange limestone	5	21	Thick	12.4	608	0.91	0	2.5Y 8/4	Pale yellow	14.7	10.2	4.5	12.2	2.7	-1.8	13.3	9.6	3.7	1.4	10.5263	0.6	6.25	0.8
September 10th	Cold	Mild	12	3	1	60	Lower	Hard	Quartzite	3	25	Thin	9.6	584	0.92	0	10YR 6/2	Greyish yellow brown	18.5	7.7	10.8	11.4	6.5	-4.3	15.2	8	7.2	3.3	21.7105	-0.3	-3.75	3.6
September 10th	Cold	Mild	12	3	1	60	Lower	Soft	Fossiliferous sandstone	4	33	Intermediate	8.6	680	0.91	0	2.5Y 6/4	Dull yellow	19.1	12.3	6.8	14.5	7.1	0.3	14.7	10.1	4.6	4.4	29.932	2.2	21.7822	2.2
September 10th	Cold	Mild	12	3	1	60	Lower	Hard	Grey siltstone	2	12	Thin	7.5	576	0.94	0	N 6/0	Grey	23.6	13.8	9.8	15.7	11.6	1.8	15.6	11.3	4.3	8	51.2821	2.5	22.1239	5.5
September 10th	Cold	Mild	12	3	1	60	Lower	Soft	Orange limestone	5	20	Thick	11.7	420	0.97	0	10YR 8/3	Light yellow	19.8	11.6	8.2	14.2	7.8	-0.4	14.5	10.6	3.9	5.3	36.5517	1	9.43396	4.3
September 10th	Cold	Mild	12	3	1	60	Lower	Hard	Quartzite	3	29	Thick	14.1	368	0.94	0	10YR 7/2	Greyish yellow brown	16.6	7.2	9.4	14	4.6	-4.8	13.8	9.2	4.6	2.8	20.2899	-2	-21.7391	4.8
September 10th	Cold	Mild	12	3	1	60	Lower	Soft	White limestone	6	16	Thick	12.3	412	0.94	0	2.5Y 8/1	Light grey	17.2	9.9	7.3	13.5	5.2	-2.1	15	9.7	5.3	2.2	14.6667	0.2	2.06186	2
September 10th	Cold	Mild	12	3	1	60	Lower	Hard	Grey siltstone	2	9	Thick	12.6	532	0.97	0	2.5GY 7/1	Light olive grey	17.8	11.6	6.2	14.7	5.8	-0.4	14.3	11	3.3	3.5	24.4755	0.6	5.45455	2.9
September 10th	Cold	Mild	12	3	1	60	Lower	Hard	Quartzite	3	30	Thick	14.3	588	0.9	0	10YR 8/1	Light grey	15.3	10.5	4.8	13.2	3.3	-1.5	14.9	10.1	4.8	0.4	2.68456	0.4	3.9604	0
September 10th	Cold	Mild	12	3	1	60	Lower	Hard	Purple siltstone	1	4	Thin	6.4	608	0.95	0	10R 6/1	Reddish grey	20	14.1	5.9	15.7	8	2.1	15.1	11.1	4	4.9	32.4503	3	27.027	1.9
September 10th	Cold	Mild	12	3	1	60	Lower	Soft	Fossiliferous sandstone	4	36	Thin	7.5	742	0.88	1	2.5Y 7/4	Light yellow	22.2	12.3	9.9	16.4	10.2	0.3	15.3	11.1	4.2	6.9	45.098	1.2	10.8108	5.7
September 10th	Cold	Mild	12	3	1	60	Lower	Soft	Fossiliferous sandstone	4	31	Thin	6.9	580	0.94	0	2.5Y 7/6	Yellowish brown	22.2	12.8	9.4	15.4	10.2	0.8	14.8	10.8	4	7.4	50	2	18.5185	5.4
September 10th	Cold	Mild	12	3	1	60	Lower	Soft	White limestone	6	15	Thin	5.9	564	0.92	2	2.5Y 8/1	Light grey	20.7	13.1	7.6	15.3	8.7	1.1	15.7	11.1	4.6	5	31.8471	2	18.018	3
September 10th	Cold	Mild	12	3	1	60	Lower	Soft	Orange limestone	5	22	Intermediate	7.6	584	0.94	0	2.5Y 7/4	Light yellow	19.9	14	5.9	15.4	7.9	2	15.3	11	4.3	4.6	30.0654	3	27.2727	1.6
September 10th	Cold	Mild	12	3	1	60	Lower	Hard	Grey siltstone	2	7	Thick	12.3	544	0.95	0	N 7/0	Greyish white	18.3	12.9	5.4	15.7	6.3	0.9	14.3	10.5	3.8	4	27.972	2.4	22.8571	1.6
September 10th	Cold	Mild	12	3	1	60	Lower	Soft	Orange limestone	5	23	Thin	6.1	792	0.94	0	5Y 8/3	Pale yellow	21.3	13.2	8.1	15.6	9.3	1.2	16.6	10.9	5.7	4.7	28.3133	2.3	21.1009	2.4
September 10th	Cold	Mild	12	3	1	60	Lower	Hard	Purple siltstone	1	2	Thick	14.3	456	0.94	0	7.5YR 5/1	Brownish grey	21.4	13.6	7.8	16.7	9.4	1.6	15.3	10.7	4.6	6.1	39.8693	2.9	27.1028	3.2
September 10th	Cold	Mild	12	3	1	60	Lower	Soft	White limestone	6	13	Intermediate	9.4	492	0.91	2	2.5Y 8/1	Light grey	21.1	11.6	9.5	15.7	9.1	-0.4	15.8	10.3	5.5	5.3	33.5443	1.3	12.6214	4
September 10th	Cold	Mild	12	3	1	60	Lower	Hard	Grey siltstone	2	11	Thin	7.3	696	0.92	0	N 7/0	Greyish white	24.4	14.6	9.8	16.9	12.4	2.6	17	10.6	6.4	7.4	43.5294	4	37.7358	3.4
September 10th	Cold	Mild	12	3	1	60	Lower	Hard	Purple siltstone	1	1	Intermediate	11.2	408	0.94	0	2.5YR 5/1	Reddish grey	25.2	15.6	9.6	18	13.2	3.6	17.8	10.7	7.1	7.4	41.573	4.9	45.7944	2.5
September 10th	Cold	Mild	12	3	1	60	Lower	Hard	Grey siltstone	2	10	Intermediate	8.4	556	0.94	0	2.5GY 7/1	Light olive grey	23.5	14.8	8.7	17.3	11.5	2.8	17.6	11.1	6.5	5.9	33.5227	3.7	33.3333	2.2
September 10th	Cold	Mild	12	3	1	60	Lower	Soft	Orange limestone	5	19	Intermediate	6.8	528	0.92	0	2.5Y 6/4	Dull yellow	19.4	14.8	4.6	16.3	7.4	2.8	17.6	11.3	6.3	1.8	10.2273	3.5	30.9735	-1.7
September 10th	Cold	Mild	12	3	1	60	Lower	Soft	White limestone	6	14	Thin	6.5	816	0.95	2	2.5Y 8/1	Light grey	22.8	10.4	12.4	14.6	10.8	-1.6	16.4	9.4	7	6.4	39.0244	1	10.6383	5.4
September 10th	Cold	Mild	12	3	1	60	Lower	Soft	Fossiliferous sandstone	4	35	Thick	15	664	0.91	1	2.5Y 5/6	Yellowish brown	19.2	12.5	6.7	13.9	7.2	0.5	13.6	10.8	2.8	5.6	41.1765	1.7	15.7407	3.9
September 10th	Cold	Mild	12	3	1	60	Lower	Hard	Purple siltstone	1	5	Thin	6.5	496	0.97	0	10R 6/1	Reddish grey	23	16.1	6.9	18.4	11	4.1	17.6	11.5	6.1	5.4	30.6818	4.6	40	0.8
September 10th	Cold	Mild	12	3	1	60	Lower	Hard	Quartzite	3	28	Intermediate	12.6	464	0.92	0	10YR 8/1	Light grey	17.7	12.1	5.6	14.9	5.7	0.1	15.1	9.2	5.9	2.6	17.2185	2.9	31.5217	-0.3
September 10th	Cold	Mild	12	3	1	60	Lower	Soft	Orange limestone	5	24	Thin	6	588	0.94	1	2.5Y 7/4	Light yellow	18.7	13.8	4.9	14.9	6.7	1.8	14	10.5	3.5	4.7	33.5714	3.3	31.4286	1.4
September 10th	Cold	Mild	12	3	1	60	Lower	Hard	Quartzite	3	27	Intermediate	11.1	448	0.94	0	10YR 8/1	Light grey	17.8	11.8	6	15.5	5.8	-0.2	14.8	9.8	5	3	20.2703	2	20.4082	1
September 10th	Cold	Mild	12	3	1	60	Lower	Soft	White limestone	6	18	Thick	12	504	0.81	0	2.5Y 8/1	Light grey	17.9	12.5	5.4	14.3	5.9	0.5	12.9	8.5	4.4	5	38.7597	4	47.0588	1
September 10th	Cold	Mild	12	3	1	60	Lower	Soft	Fossiliferous sandstone	4	34	Thick	13.9	520	0.95	0	2.5Y 7/4	Light yellow	19.3	12.5	6.8	14.7	7.3	0.5	14.9	10.3	4.6	4.4	29.5302	2.2	21.3592	2.2
September 10th	Cold	Mild	12	3	1	60	Lower	Hard	Purple siltstone	1	6	Thick	13.5	516	1	0	7.5R 5/1	Reddish grey	20.3	13.2	7.1	16.5	8.3	1.2	15.9	9.4	6.5	4.4	27.673	3.8	40.4255	0.6
September 10th	Cold	Mild	12	3	1	60	Lower	Hard	Quartzite	3	26	Thin	7.9	496	0.94	0	10YR 7/2	Greyish yellow brown	21.7	13.7	8	17	9.7	1.7	17.2	11.9	5.3	4.5	26.1628	1.8	15.1261	2.7
September 10th	Cold	Mild	12	3	1	60	Lower	Soft	White limestone	6	17	Intermediate	9.5	448	0.92	1	2.5Y 8/1	Light grey	17.1	13	4.1	14.4	5.1	1	14.9	10.6	4.3	2.2	14.7651	2.4	22.6415	-0.2
September 10th	Cold	Mild	12	3	1	60	Lower	Hard	Grey siltstone	2	8	Intermediate	8.1	584	0.97	0	2.5GY 6/1	Olive grey	20.4	14.2	6.2	16.9	8.4	2.2	16.6	11.5	5.1	3.8	22.8916	2.7	23.4783	1.1
September 10th	Cold	Mild	12	3	1	60	Lower	Soft	Fossiliferous sandstone	4	32	Intermediate	7.9	536	0.91	0	2.5Y 7/4	Light yellow	19.3	14.4	4.9	16.8	7.3	2.4	15.3	11.5	3.8	4	26.1438	2.9	25.2174	1.1
September 10th	Cold	Mild	13	3	0	120	Upper	Hard	Purple siltstone	1	3	Intermediate	11.6	424	0.91	0	10R 5/1	Reddish grey	28.9	16.7	12.2	23.9	15.9	3.7	23	12.6	10.4	5.9	25.6522	4.1	32.5397	1.8
September 10th	Cold	Mild	13	3	0	120	Upper	Soft	Orange limestone	5	21	Thick	12.4	676	0.88	1	2.5Y 8/4	Pale yellow	24.5	14.5	10	18.5	11.5	1.5	20.8	12	8.8	3.7	17.7885	2.5	20.8333	1.2
September 10th	Cold	Mild	13	3	0	120	Upper	Hard	Quartzite	3	25	Thin	9.6	636	0.87	0	10YR 6/2	Greyish yellow brown	23.2	13.5	9.7	18.6	10.2	0.5	19.3	8.9	10.4	3.9	20.2073	4.6	51.6854	-0.7
September 10th	Cold	Mild	13	3	0	120	Upper	Soft	Fossiliferous sandstone	4	33	Intermediate	8.6	672	0.85	0	2.5Y 6/4	Dull yellow	25.7	14.4	11.3	19.4	12.7	1.4	24	11.4	12.6	1.7	7.08333	3	26.3158	-1.3
September 10th	Cold	Mild	13	3	0	120	Upper	Hard	Grey siltstone	2	12	Thin	7.5	580	0.95	0	N 6/0	Grey	29.8	20.7	9.1	22.9	16.8	7.7	23.4	14.5	8.9	6.4	27.3504	6.2	42.7586	0.2
September 10th	Cold	Mild	13	3	0	120	Upper	Soft	Orange limestone	5	20	Thick	11.7	356	0.92	0	10YR 8/3	Light yellow	25.4	15.2	10.2	20.8	12.4	2.2	20.3	12	8.3	5.1	25.1232	3.2	26.6667	1.9
September 10th	Cold	Mild	13	3	0	120	Upper	Hard	Quartzite	3	29	Thick	14.1	400	0.94	1	10YR 7/2	Greyish yellow brown	21.1	12.3	8.8	15.8	8.1	-0.7	17.3	8.1	9.2	3.8	21.9653	4.2	51.8519	-0.4
September 10th	Cold	Mild	13	3	0	120	Upper	Soft	White limestone	6	16	Thick	12.3	460	0.94	1	2.5Y 8/1	Light grey	23.5	14	9.5	17.2	10.5	1	19.1	11.3	7.8	4.4	23.0366	2.7	23.8938	1.7
September 10th	Cold	Mild	13	3	0	120	Upper	Hard	Grey siltstone	2	9	Thick	12.6	624	0.92	0	2.5GY 7/1	Light olive grey	28.2	15.8	12.4	20.5	15.2	2.8	22.6	11.2	11.4	5.6	24.7788	4.6	41.0714	1
September 10th	Cold	Mild	13	3	0	120	Upper	Hard	Quartzite	3	30	Thick	14.3	376	0.96	0	10YR 8/1	Light grey	20.2	11.3	8.9	15.1	7.2	-1.7	15.5	7.2	8.3	4.7	30.3226	4.1	56.9444	0.6
September 10th	Cold	Mild	13	3	0	120	Upper	Hard	Purple siltstone	1	4	Thin	6.4	608	0.94	0	10R 6/1	Reddish grey	25.4	16	9.4	19.4	12.4	3	19	11.3	7.7	6.4	33.6842	4.7	41.5929	1.7
September 10th	Cold	Mild	13	3	0	120	Upper	Soft	Fossiliferous sandstone	4	36	Thin	7.5	732	0.86	0	2.5Y 7/4	Light yellow	27.1	14.1	13	21.3	14.1	1.1	21.4	9.5	11.9	5.7	26.6355	4.6	48.4211	1.1
September 10th	Cold	Mild	13	3	0	120	Upper	Soft	Fossiliferous sandstone	4	31	Thin	6.9	588	0.94	0	2.5Y 7/6	Yellowish brown	26.7	14.7	12	21.8	13.7	1.7	21.3	10.5	10.8	5.4	25.3521	4.2	40	1.2
September 10th	Cold	Mild	13	3	0	120	Upper	Soft	White limestone	6	15	Thin	5.9	612	0.82	1	2.5Y 8/1	Light grey	23.3	13.8	9.5	19.8	10.3	0.8	18.2	10.6	7.6	5.1	28.022	3.2	30.1887	1.9
September 10th	Cold	Mild	13	3	0	120	Upper	Soft	Orange limestone	5	22	Intermediate	7.6	632	0.94	0	2.5Y 7/4	Light yellow	27.7	16	11.7	21.9	14.7	3	21.3	11.3	10	6.4	30.0469	4.7	41.5929	1.7
September 10th	Cold	Mild	13	3	0	120	Upper	Hard	Grey siltstone	2	7	Thick	12.3	436	0.94	0	N 7/0	Greyish white	27	14.6	12.4	21.7	14	1.6	21.3	9.5	11.8	5.7	26.7606	5.1	53.6842	0.6
September 10th	Cold	Mild	13	3	0	120	Upper	Soft	Orange limestone	5	23	Thin	6.1	808	0.91	0	5Y 8/3	Pale yellow	24.8	15.5	9.3	20.4	11.8	2.5	18.9	11.4	7.5	5.9	31.2169	4.1	35.9649	1.8
September 10th	Cold	Mild	13	3	0	120	Upper	Hard	Purple siltstone	1	2	Thick	14.3	484	0.97	0	7.5YR 5/1	Brownish grey	30.2	17.5	12.7	23.8	17.2	4.5	23.7	12.4	11.3	6.5	27.4262	5.1	41.129	1.4
September 10th	Cold	Mild	13	3	0	120	Upper	Soft	White limestone	6	13	Intermediate	9.4	592	0.91	2	2.5Y 8/1	Light grey	23.3	11.8	11.5	17.8	10.3	-1.2	18.5	8.4	10.1	4.8	25.9459	3.4	40.4762	1.4
September 10th	Cold	Mild	13	3	0	120	Upper	Hard	Grey siltstone	2	11	Thin	7.3	688	0.94	0	N 7/0	Greyish white	28.9	18.3	10.6	24.9	15.9	5.3	22.6	13	9.6	6.3	27.8761	5.3	40.7692	1
September 10th	Cold	Mild	13	3	0	120	Upper	Hard	Purple siltstone	1	1	Intermediate	11.2	384	0.92	0	2.5YR 5/1	Reddish grey	28.7	18.3	10.4	24.2	15.7	5.3	22.7	13.2	9.5	6	26.4317	5.1	38.6364	0.9
September 10th	Cold	Mild	13	3	0	120	Upper	Hard	Grey siltstone	2	10	Intermediate	8.4	552	0.94	0	2.5GY 7/1	Light olive grey	27.6	17.8	9.8	22.8	14.6	4.8	21.3	12.3	9	6.3	29.5775	5.5	44.7154	0.8
September 10th	Cold	Mild	13	3	0	120	Upper	Soft	Orange limestone	5	19	Intermediate	6.8	604	0.94	0	2.5Y 6/4	Dull yellow	26.9	15.3	11.6	19.9	13.9	2.3	21.3	11.3	10	5.6	26.2911	4	35.3982	1.6
September 10th	Cold	Mild	13	3	0	120	Upper	Soft	White limestone	6	14	Thin	6.5	830	0.97	4	2.5Y 8/1	Light grey	24.6	13.9	10.7	18.3	11.6	0.9	19.6	10.2	9.4	5	25.5102	3.7	36.2745	1.3
September 10th	Cold	Mild	13	3	0	120	Upper	Soft	Fossiliferous sandstone	4	35	Thick	15	704	0.91	0	2.5Y 5/6	Yellowish brown	29	18.3	10.7	25	16	5.3	23.7	13	10.7	5.3	22.3629	5.3	40.7692	0
September 10th	Cold	Mild	13	3	0	120	Upper	Hard	Purple siltstone	1	5	Thin	6.5	508	0.92	0	10R 6/1	Reddish grey	28.6	17.1	11.5	23.5	15.6	4.1	23.3	11.3	12	5.3	22.7468	5.8	51.3274	-0.5
September 10th	Cold	Mild	13	3	0	120	Upper	Hard	Quartzite	3	28	Intermediate	12.6	328	0.95	0	10YR 8/1	Light grey	19.3	13	6.3	16.6	6.3	0	16	8.4	7.6	3.3	20.625	4.6	54.7619	-1.3
September 10th	Cold	Mild	13	3	0	120	Upper	Soft	Orange limestone	5	24	Thin	6	620	0.94	0	2.5Y 7/4	Light yellow	25.8	16.1	9.7	18.6	12.8	3.1	19.8	11.3	8.5	6	30.303	4.8	42.4779	1.2
September 10th	Cold	Mild	13	3	0	120	Upper	Hard	Quartzite	3	27	Intermediate	11.1	444	0.94	0	10YR 8/1	Light grey	18.1	12	6.1	16	5.1	-1	13.8	7.6	6.2	4.3	31.1594	4.4	57.8947	-0.1
September 10th	Cold	Mild	13	3	0	120	Upper	Soft	White limestone	6	18	Thick	12	544	0.85	1	2.5Y 8/1	Light grey	24.9	14.6	10.3	18.3	11.9	1.6	18.7	8.9	9.8	6.2	33.1551	5.7	64.0449	0.5
September 10th	Cold	Mild	13	3	0	120	Upper	Soft	Fossiliferous sandstone	4	34	Thick	13.9	436	0.76	0	2.5Y 7/4	Light yellow	26	13.5	12.5	20.4	13	0.5	19.4	9.6	9.8	6.6	34.0206	3.9	40.625	2.7
September 10th	Cold	Mild	13	3	0	120	Upper	Hard	Purple siltstone	1	6	Thick	13.5	596	0.94	0	7.5R 5/1	Reddish grey	27.8	17	10.8	24.2	14.8	4	21.7	12	9.7	6.1	28.1106	5	41.6667	1.1
September 10th	Cold	Mild	13	3	0	120	Upper	Hard	Quartzite	3	26	Thin	7.9	500	0.97	0	10YR 7/2	Greyish yellow brown	24	14.5	9.5	18.9	11	1.5	17	9.7	7.3	7	41.1765	4.8	49.4845	2.2
September 10th	Cold	Mild	13	3	0	120	Upper	Soft	White limestone	6	17	Intermediate	9.5	444	0.95	0	2.5Y 8/1	Light grey	21.2	11.4	9.8	17.2	8.2	-1.6	17	9.1	7.9	4.2	24.7059	2.3	25.2747	1.9
September 10th	Cold	Mild	13	3	0	120	Upper	Hard	Grey siltstone	2	8	Intermediate	8.1	592	0.97	0	2.5GY 6/1	Olive grey	26.1	16.5	9.6	22.2	13.1	3.5	21.2	11.1	10.1	4.9	23.1132	5.4	48.6486	-0.5
September 10th	Cold	Mild	13	3	0	120	Upper	Soft	Fossiliferous sandstone	4	32	Intermediate	7.9	524	0.92	0	2.5Y 7/4	Light yellow	24.7	15.9	8.8	20	11.7	2.9	19.9	11	8.9	4.8	24.1206	4.9	44.5455	-0.1
September 10th	Cold	Mild	13	3	0	120	Lower	Hard	Purple siltstone	1	3	Intermediate	11.6	354	0.91	0	10R 5/1	Reddish grey	22.8	15.4	7.4	19.2	9.8	2.4	17.5	9.8	7.7	5.3	30.2857	5.6	57.1429	-0.3
September 10th	Cold	Mild	13	3	0	120	Lower	Soft	Orange limestone	5	21	Thick	12.4	608	0.91	0	2.5Y 8/4	Pale yellow	19.9	12.8	7.1	15.2	6.9	-0.2	14.7	10.2	4.5	5.2	35.3741	2.6	25.4902	2.6
September 10th	Cold	Mild	13	3	0	120	Lower	Hard	Quartzite	3	25	Thin	9.6	584	0.92	0	10YR 6/2	Greyish yellow brown	25.3	12.9	12.4	16.4	12.3	-0.1	18.5	7.7	10.8	6.8	36.7568	5.2	67.5325	1.6
September 10th	Cold	Mild	13	3	0	120	Lower	Soft	Fossiliferous sandstone	4	33	Intermediate	8.6	680	0.91	0	2.5Y 6/4	Dull yellow	26.4	14.3	12.1	18.4	13.4	1.3	19.1	12.3	6.8	7.3	38.2199	2	16.2602	5.3
September 10th	Cold	Mild	13	3	0	120	Lower	Hard	Grey siltstone	2	12	Thin	7.5	576	0.94	0	N 6/0	Grey	29.8	18.8	11	20.1	16.8	5.8	23.6	13.8	9.8	6.2	26.2712	5	36.2319	1.2
September 10th	Cold	Mild	13	3	0	120	Lower	Soft	Orange limestone	5	20	Thick	11.7	420	0.97	0	10YR 8/3	Light yellow	18.8	12.3	6.5	15.4	5.8	-0.7	19.8	11.6	8.2	-1	-5.05051	0.7	6.03448	-1.7
September 10th	Cold	Mild	13	3	0	120	Lower	Hard	Quartzite	3	29	Thick	14.1	368	0.94	0	10YR 7/2	Greyish yellow brown	20.6	9.9	10.7	16.1	7.6	-3.1	16.6	7.2	9.4	4	24.0964	2.7	37.5	1.3
September 10th	Cold	Mild	13	3	0	120	Lower	Soft	White limestone	6	16	Thick	12.3	412	0.94	0	2.5Y 8/1	Light grey	20.2	12.2	8	15.3	7.2	-0.8	17.2	9.9	7.3	3	17.4419	2.3	23.2323	0.7
September 10th	Cold	Mild	13	3	0	120	Lower	Hard	Grey siltstone	2	9	Thick	12.6	532	0.97	0	2.5GY 7/1	Light olive grey	22.1	15.1	7	17.8	9.1	2.1	17.8	11.6	6.2	4.3	24.1573	3.5	30.1724	0.8
September 10th	Cold	Mild	13	3	0	120	Lower	Hard	Quartzite	3	30	Thick	14.3	588	0.9	0	10YR 8/1	Light grey	22.2	12.2	10	16.7	9.2	-0.8	15.3	10.5	4.8	6.9	45.098	1.7	16.1905	5.2
September 10th	Cold	Mild	13	3	0	120	Lower	Hard	Purple siltstone	1	4	Thin	6.4	608	0.95	0	10R 6/1	Reddish grey	26.8	17.6	9.2	18.9	13.8	4.6	20	14.1	5.9	6.8	34	3.5	24.8227	3.3
September 10th	Cold	Mild	13	3	0	120	Lower	Soft	Fossiliferous sandstone	4	36	Thin	7.5	742	0.88	1	2.5Y 7/4	Light yellow	29.1	17	12.1	20.2	16.1	4	22.2	12.3	9.9	6.9	31.0811	4.7	38.2114	2.2
September 10th	Cold	Mild	13	3	0	120	Lower	Soft	Fossiliferous sandstone	4	31	Thin	6.9	580	0.94	0	2.5Y 7/6	Yellowish brown	28.8	15	13.8	18.2	15.8	2	22.2	12.8	9.4	6.6	29.7297	2.2	17.1875	4.4
September 10th	Cold	Mild	13	3	0	120	Lower	Soft	White limestone	6	15	Thin	5.9	564	0.92	2	2.5Y 8/1	Light grey	25.5	15.6	9.9	17.6	12.5	2.6	20.7	13.1	7.6	4.8	23.1884	2.5	19.084	2.3
September 10th	Cold	Mild	13	3	0	120	Lower	Soft	Orange limestone	5	22	Intermediate	7.6	584	0.94	0	2.5Y 7/4	Light yellow	27.8	16.2	11.6	18.6	14.8	3.2	19.9	14	5.9	7.9	39.6985	2.2	15.7143	5.7
September 10th	Cold	Mild	13	3	0	120	Lower	Hard	Grey siltstone	2	7	Thick	12.3	544	0.95	0	N 7/0	Greyish white	22	16.4	5.6	18.8	9	3.4	18.3	12.9	5.4	3.7	20.2186	3.5	27.1318	0.2
September 10th	Cold	Mild	13	3	0	120	Lower	Soft	Orange limestone	5	23	Thin	6.1	792	0.94	0	5Y 8/3	Pale yellow	25.1	15.7	9.4	17.8	12.1	2.7	21.3	13.2	8.1	3.8	17.8404	2.5	18.9394	1.3
September 10th	Cold	Mild	13	3	0	120	Lower	Hard	Purple siltstone	1	2	Thick	14.3	456	0.94	0	7.5YR 5/1	Brownish grey	26.8	16.4	10.4	20.6	13.8	3.4	21.4	13.6	7.8	5.4	25.2336	2.8	20.5882	2.6
September 10th	Cold	Mild	13	3	0	120	Lower	Soft	White limestone	6	13	Intermediate	9.4	492	0.91	2	2.5Y 8/1	Light grey	28.6	14	14.6	18	15.6	1	21.1	11.6	9.5	7.5	35.545	2.4	20.6897	5.1
September 10th	Cold	Mild	13	3	0	120	Lower	Hard	Grey siltstone	2	11	Thin	7.3	696	0.92	0	N 7/0	Greyish white	30.7	18.5	12.2	20.8	17.7	5.5	24.4	14.6	9.8	6.3	25.8197	3.9	26.7123	2.4
September 10th	Cold	Mild	13	3	0	120	Lower	Hard	Purple siltstone	1	1	Intermediate	11.2	408	0.94	0	2.5YR 5/1	Reddish grey	29.9	18.6	11.3	20.9	16.9	5.6	25.2	15.6	9.6	4.7	18.6508	3	19.2308	1.7
September 10th	Cold	Mild	13	3	0	120	Lower	Hard	Grey siltstone	2	10	Intermediate	8.4	556	0.94	0	2.5GY 7/1	Light olive grey	28.9	19.6	9.3	21.9	15.9	6.6	23.5	14.8	8.7	5.4	22.9787	4.8	32.4324	0.6
September 10th	Cold	Mild	13	3	0	120	Lower	Soft	Orange limestone	5	19	Intermediate	6.8	528	0.92	0	2.5Y 6/4	Dull yellow	28	17.5	10.5	18.9	15	4.5	19.4	14.8	4.6	8.6	44.3299	2.7	18.2432	5.9
September 10th	Cold	Mild	13	3	0	120	Lower	Soft	White limestone	6	14	Thin	6.5	816	0.95	2	2.5Y 8/1	Light grey	27.6	13.3	14.3	16.1	14.6	0.3	22.8	10.4	12.4	4.8	21.0526	2.9	27.8846	1.9
September 10th	Cold	Mild	13	3	0	120	Lower	Soft	Fossiliferous sandstone	4	35	Thick	15	664	0.91	1	2.5Y 5/6	Yellowish brown	26	15.3	10.7	18	13	2.3	19.2	12.5	6.7	6.8	35.4167	2.8	22.4	4
September 10th	Cold	Mild	13	3	0	120	Lower	Hard	Purple siltstone	1	5	Thin	6.5	496	0.97	0	10R 6/1	Reddish grey	28.5	20.4	8.1	22.3	15.5	7.4	23	16.1	6.9	5.5	23.913	4.3	26.7081	1.2
September 10th	Cold	Mild	13	3	0	120	Lower	Hard	Quartzite	3	28	Intermediate	12.6	464	0.92	0	10YR 8/1	Light grey	20.2	15.1	5.1	17.3	7.2	2.1	17.7	12.1	5.6	2.5	14.1243	3	24.7934	-0.5
September 10th	Cold	Mild	13	3	0	120	Lower	Soft	Orange limestone	5	24	Thin	6	588	0.94	1	2.5Y 7/4	Light yellow	22.4	16.9	5.5	18.7	9.4	3.9	18.7	13.8	4.9	3.7	19.7861	3.1	22.4638	0.6
September 10th	Cold	Mild	13	3	0	120	Lower	Hard	Quartzite	3	27	Intermediate	11.1	448	0.94	0	10YR 8/1	Light grey	19.8	13.7	6.1	17	6.8	0.7	17.8	11.8	6	2	11.236	1.9	16.1017	0.1
September 10th	Cold	Mild	13	3	0	120	Lower	Soft	White limestone	6	18	Thick	12	504	0.81	0	2.5Y 8/1	Light grey	20	12.9	7.1	16.3	7	-0.1	17.9	12.5	5.4	2.1	11.7318	0.4	3.2	1.7
September 10th	Cold	Mild	13	3	0	120	Lower	Soft	Fossiliferous sandstone	4	34	Thick	13.9	520	0.95	0	2.5Y 7/4	Light yellow	23.4	16.2	7.2	18.2	10.4	3.2	19.3	12.5	6.8	4.1	21.2435	3.7	29.6	0.4
September 10th	Cold	Mild	13	3	0	120	Lower	Hard	Purple siltstone	1	6	Thick	13.5	516	1	0	7.5R 5/1	Reddish grey	25	17	8	20.5	12	4	20.3	13.2	7.1	4.7	23.1527	3.8	28.7879	0.9
September 10th	Cold	Mild	13	3	0	120	Lower	Hard	Quartzite	3	26	Thin	7.9	496	0.94	0	10YR 7/2	Greyish yellow brown	28	17.3	10.7	21.3	15	4.3	21.7	13.7	8	6.3	29.0323	3.6	26.2774	2.7
September 10th	Cold	Mild	13	3	0	120	Lower	Soft	White limestone	6	17	Intermediate	9.5	448	0.92	1	2.5Y 8/1	Light grey	20.2	14.8	5.4	17.2	7.2	1.8	17.1	13	4.1	3.1	18.1287	1.8	13.8462	1.3
September 10th	Cold	Mild	13	3	0	120	Lower	Hard	Grey siltstone	2	8	Intermediate	8.1	584	0.97	0	2.5GY 6/1	Olive grey	25.7	18.3	7.4	20.8	12.7	5.3	20.4	14.2	6.2	5.3	25.9804	4.1	28.8732	1.2
September 10th	Cold	Mild	13	3	0	120	Lower	Soft	Fossiliferous sandstone	4	32	Intermediate	7.9	536	0.91	0	2.5Y 7/4	Light yellow	22.8	16.9	5.9	19.2	9.8	3.9	19.3	14.4	4.9	3.5	18.1347	2.5	17.3611	1
September 10th	Cold	Mild	14	3	0	180	Upper	Hard	Purple siltstone	1	3	Intermediate	11.6	424	0.91	0	10R 5/1	Reddish grey	35.6	22.2	13.4	28.4	21.6	8.2	28.9	16.7	12.2	6.7	23.1834	5.5	32.9341	1.2
September 10th	Cold	Mild	14	3	0	180	Upper	Soft	Orange limestone	5	21	Thick	12.4	676	0.88	1	2.5Y 8/4	Pale yellow	30.5	17.9	12.6	22.1	16.5	3.9	24.5	14.5	10	6	24.4898	3.4	23.4483	2.6
September 10th	Cold	Mild	14	3	0	180	Upper	Hard	Quartzite	3	25	Thin	9.6	636	0.87	0	10YR 6/2	Greyish yellow brown	29.2	18.5	10.7	22.8	15.2	4.5	23.2	13.5	9.7	6	25.8621	5	37.037	1
September 10th	Cold	Mild	14	3	0	180	Upper	Soft	Fossiliferous sandstone	4	33	Intermediate	8.6	672	0.85	0	2.5Y 6/4	Dull yellow	32.5	17.7	14.8	24.2	18.5	3.7	25.7	14.4	11.3	6.8	26.4591	3.3	22.9167	3.5
September 10th	Cold	Mild	14	3	0	180	Upper	Hard	Grey siltstone	2	12	Thin	7.5	580	0.95	0	N 6/0	Grey	36.1	25.1	11	29.2	22.1	11.1	29.8	20.7	9.1	6.3	21.1409	4.4	21.256	1.9
September 10th	Cold	Mild	14	3	0	180	Upper	Soft	Orange limestone	5	20	Thick	11.7	356	0.92	0	10YR 8/3	Light yellow	31.7	17.4	14.3	24.8	17.7	3.4	25.4	15.2	10.2	6.3	24.8031	2.2	14.4737	4.1
September 10th	Cold	Mild	14	3	0	180	Upper	Hard	Quartzite	3	29	Thick	14.1	400	0.94	1	10YR 7/2	Greyish yellow brown	26.1	16.2	9.9	22	12.1	2.2	21.1	12.3	8.8	5	23.6967	3.9	31.7073	1.1
September 10th	Cold	Mild	14	3	0	180	Upper	Soft	White limestone	6	16	Thick	12.3	460	0.94	1	2.5Y 8/1	Light grey	27.5	16.5	11	23.2	13.5	2.5	23.5	14	9.5	4	17.0213	2.5	17.8571	1.5
September 10th	Cold	Mild	14	3	0	180	Upper	Hard	Grey siltstone	2	9	Thick	12.6	624	0.92	0	2.5GY 7/1	Light olive grey	33.5	20.3	13.2	26.3	19.5	6.3	28.2	15.8	12.4	5.3	18.7943	4.5	28.481	0.8
September 10th	Cold	Mild	14	3	0	180	Upper	Hard	Quartzite	3	30	Thick	14.3	376	0.96	0	10YR 8/1	Light grey	26.1	14.5	11.6	19.3	12.1	0.5	20.2	11.3	8.9	5.9	29.2079	3.2	28.3186	2.7
September 10th	Cold	Mild	14	3	0	180	Upper	Hard	Purple siltstone	1	4	Thin	6.4	608	0.94	0	10R 6/1	Reddish grey	31.4	20.1	11.3	25.1	17.4	6.1	25.4	16	9.4	6	23.622	4.1	25.625	1.9
September 10th	Cold	Mild	14	3	0	180	Upper	Soft	Fossiliferous sandstone	4	36	Thin	7.5	732	0.86	0	2.5Y 7/4	Light yellow	32.7	19	13.7	26.4	18.7	5	27.1	14.1	13	5.6	20.6642	4.9	34.7518	0.7
September 10th	Cold	Mild	14	3	0	180	Upper	Soft	Fossiliferous sandstone	4	31	Thin	6.9	588	0.94	0	2.5Y 7/6	Yellowish brown	33.2	18.5	14.7	26.7	19.2	4.5	26.7	14.7	12	6.5	24.3446	3.8	25.8503	2.7
September 10th	Cold	Mild	14	3	0	180	Upper	Soft	White limestone	6	15	Thin	5.9	612	0.82	1	2.5Y 8/1	Light grey	29.8	17.5	12.3	23.9	15.8	3.5	23.3	13.8	9.5	6.5	27.897	3.7	26.8116	2.8
September 10th	Cold	Mild	14	3	0	180	Upper	Soft	Orange limestone	5	22	Intermediate	7.6	632	0.94	0	2.5Y 7/4	Light yellow	33.9	20.6	13.3	27.1	19.9	6.6	27.7	16	11.7	6.2	22.3827	4.6	28.75	1.6
September 10th	Cold	Mild	14	3	0	180	Upper	Hard	Grey siltstone	2	7	Thick	12.3	436	0.94	0	N 7/0	Greyish white	33.8	19.2	14.6	27.5	19.8	5.2	27	14.6	12.4	6.8	25.1852	4.6	31.5068	2.2
September 10th	Cold	Mild	14	3	0	180	Upper	Soft	Orange limestone	5	23	Thin	6.1	808	0.91	0	5Y 8/3	Pale yellow	30.4	19.7	10.7	26.4	16.4	5.7	24.8	15.5	9.3	5.6	22.5806	4.2	27.0968	1.4
September 10th	Cold	Mild	14	3	0	180	Upper	Hard	Purple siltstone	1	2	Thick	14.3	484	0.97	0	7.5YR 5/1	Brownish grey	35.6	23.4	12.2	29	21.6	9.4	30.2	17.5	12.7	5.4	17.8808	5.9	33.7143	-0.5
September 10th	Cold	Mild	14	3	0	180	Upper	Soft	White limestone	6	13	Intermediate	9.4	592	0.91	2	2.5Y 8/1	Light grey	28.5	14.7	13.8	21.4	14.5	0.7	23.3	11.8	11.5	5.2	22.3176	2.9	24.5763	2.3
September 10th	Cold	Mild	14	3	0	180	Upper	Hard	Grey siltstone	2	11	Thin	7.3	688	0.94	0	N 7/0	Greyish white	34.9	21.8	13.1	30.1	20.9	7.8	28.9	18.3	10.6	6	20.7612	3.5	19.1257	2.5
September 10th	Cold	Mild	14	3	0	180	Upper	Hard	Purple siltstone	1	1	Intermediate	11.2	384	0.92	0	2.5YR 5/1	Reddish grey	34.9	22.4	12.5	28.8	20.9	8.4	28.7	18.3	10.4	6.2	21.6028	4.1	22.4044	2.1
September 10th	Cold	Mild	14	3	0	180	Upper	Hard	Grey siltstone	2	10	Intermediate	8.4	552	0.94	0	2.5GY 7/1	Light olive grey	33.5	22.3	11.2	27.3	19.5	8.3	27.6	17.8	9.8	5.9	21.3768	4.5	25.2809	1.4
September 10th	Cold	Mild	14	3	0	180	Upper	Soft	Orange limestone	5	19	Intermediate	6.8	604	0.94	0	2.5Y 6/4	Dull yellow	32.4	19.8	12.6	25.2	18.4	5.8	26.9	15.3	11.6	5.5	20.4461	4.5	29.4118	1
September 10th	Cold	Mild	14	3	0	180	Upper	Soft	White limestone	6	14	Thin	6.5	830	0.97	4	2.5Y 8/1	Light grey	29.9	17.8	12.1	21.9	15.9	3.8	24.6	13.9	10.7	5.3	21.5447	3.9	28.0576	1.4
September 10th	Cold	Mild	14	3	0	180	Upper	Soft	Fossiliferous sandstone	4	35	Thick	15	704	0.91	0	2.5Y 5/6	Yellowish brown	34.7	24.3	10.4	30.1	20.7	10.3	29	18.3	10.7	5.7	19.6552	6	32.7869	-0.3
September 10th	Cold	Mild	14	3	0	180	Upper	Hard	Purple siltstone	1	5	Thin	6.5	508	0.92	0	10R 6/1	Reddish grey	34.9	21.2	13.7	29.3	20.9	7.2	28.6	17.1	11.5	6.3	22.028	4.1	23.9766	2.2
September 10th	Cold	Mild	14	3	0	180	Upper	Hard	Quartzite	3	28	Intermediate	12.6	328	0.95	0	10YR 8/1	Light grey	23.8	15.1	8.7	18.1	9.8	1.1	19.3	13	6.3	4.5	23.3161	2.1	16.1538	2.4
September 10th	Cold	Mild	14	3	0	180	Upper	Soft	Orange limestone	5	24	Thin	6	620	0.94	0	2.5Y 7/4	Light yellow	31.2	18.7	12.5	23.5	17.2	4.7	25.8	16.1	9.7	5.4	20.9302	2.6	16.1491	2.8
September 10th	Cold	Mild	14	3	0	180	Upper	Hard	Quartzite	3	27	Intermediate	11.1	444	0.94	0	10YR 8/1	Light grey	22.2	15.9	6.3	19.7	8.2	1.9	18.1	12	6.1	4.1	22.6519	3.9	32.5	0.2
September 10th	Cold	Mild	14	3	0	180	Upper	Soft	White limestone	6	18	Thick	12	544	0.85	1	2.5Y 8/1	Light grey	29.3	20.3	9	21	15.3	6.3	24.9	14.6	10.3	4.4	17.6707	5.7	39.0411	-1.3
September 10th	Cold	Mild	14	3	0	180	Upper	Soft	Fossiliferous sandstone	4	34	Thick	13.9	436	0.76	0	2.5Y 7/4	Light yellow	31.6	16.9	14.7	26	17.6	2.9	26	13.5	12.5	5.6	21.5385	3.4	25.1852	2.2
September 10th	Cold	Mild	14	3	0	180	Upper	Hard	Purple siltstone	1	6	Thick	13.5	596	0.94	0	7.5R 5/1	Reddish grey	33.6	21.8	11.8	28.8	19.6	7.8	27.8	17	10.8	5.8	20.8633	4.8	28.2353	1
September 10th	Cold	Mild	14	3	0	180	Upper	Hard	Quartzite	3	26	Thin	7.9	500	0.97	0	10YR 7/2	Greyish yellow brown	27.6	18.3	9.3	21	13.6	4.3	24	14.5	9.5	3.6	15	3.8	26.2069	-0.2
September 10th	Cold	Mild	14	3	0	180	Upper	Soft	White limestone	6	17	Intermediate	9.5	444	0.95	0	2.5Y 8/1	Light grey	26.3	13.3	13	21.6	12.3	-0.7	21.2	11.4	9.8	5.1	24.0566	1.9	16.6667	3.2
September 10th	Cold	Mild	14	3	0	180	Upper	Hard	Grey siltstone	2	8	Intermediate	8.1	592	0.97	0	2.5GY 6/1	Olive grey	31.4	19.8	11.6	26.7	17.4	5.8	26.1	16.5	9.6	5.3	20.3065	3.3	20	2
September 10th	Cold	Mild	14	3	0	180	Upper	Soft	Fossiliferous sandstone	4	32	Intermediate	7.9	524	0.92	0	2.5Y 7/4	Light yellow	29.8	18.9	10.9	24.7	15.8	4.9	24.7	15.9	8.8	5.1	20.6478	3	18.8679	2.1
September 10th	Cold	Mild	14	3	0	180	Lower	Hard	Purple siltstone	1	3	Intermediate	11.6	354	0.91	0	10R 5/1	Reddish grey	30	18.9	11.1	22.6	16	4.9	22.8	15.4	7.4	7.2	31.5789	3.5	22.7273	3.7
September 10th	Cold	Mild	14	3	0	180	Lower	Soft	Orange limestone	5	21	Thick	12.4	608	0.91	0	2.5Y 8/4	Pale yellow	23.7	15.6	8.1	18.8	9.7	1.6	19.9	12.8	7.1	3.8	19.0955	2.8	21.875	1
September 10th	Cold	Mild	14	3	0	180	Lower	Hard	Quartzite	3	25	Thin	9.6	584	0.92	0	10YR 6/2	Greyish yellow brown	29.3	16.6	12.7	22.1	15.3	2.6	25.3	12.9	12.4	4	15.8103	3.7	28.6822	0.3
September 10th	Cold	Mild	14	3	0	180	Lower	Soft	Fossiliferous sandstone	4	33	Intermediate	8.6	680	0.91	0	2.5Y 6/4	Dull yellow	30.9	16.7	14.2	22.5	16.9	2.7	26.4	14.3	12.1	4.5	17.0455	2.4	16.7832	2.1
September 10th	Cold	Mild	14	3	0	180	Lower	Hard	Grey siltstone	2	12	Thin	7.5	576	0.94	0	N 6/0	Grey	35.5	23.3	12.2	24.3	21.5	9.3	29.8	18.8	11	5.7	19.1275	4.5	23.9362	1.2
September 10th	Cold	Mild	14	3	0	180	Lower	Soft	Orange limestone	5	20	Thick	11.7	420	0.97	0	10YR 8/3	Light yellow	21.8	14.4	7.4	17.4	7.8	0.4	18.8	12.3	6.5	3	15.9574	2.1	17.0732	0.9
September 10th	Cold	Mild	14	3	0	180	Lower	Hard	Quartzite	3	29	Thick	14.1	368	0.94	0	10YR 7/2	Greyish yellow brown	22.6	13.3	9.3	16	8.6	-0.7	20.6	9.9	10.7	2	9.70874	3.4	34.3434	-1.4
September 10th	Cold	Mild	14	3	0	180	Lower	Soft	White limestone	6	16	Thick	12.3	412	0.94	0	2.5Y 8/1	Light grey	22.6	14.4	8.2	17.7	8.6	0.4	20.2	12.2	8	2.4	11.8812	2.2	18.0328	0.2
September 10th	Cold	Mild	14	3	0	180	Lower	Hard	Grey siltstone	2	9	Thick	12.6	532	0.97	0	2.5GY 7/1	Light olive grey	25.3	17.5	7.8	20.6	11.3	3.5	22.1	15.1	7	3.2	14.4796	2.4	15.894	0.8
September 10th	Cold	Mild	14	3	0	180	Lower	Hard	Quartzite	3	30	Thick	14.3	588	0.9	0	10YR 8/1	Light grey	25.4	14.3	11.1	19	11.4	0.3	22.2	12.2	10	3.2	14.4144	2.1	17.2131	1.1
September 10th	Cold	Mild	14	3	0	180	Lower	Hard	Purple siltstone	1	4	Thin	6.4	608	0.95	0	10R 6/1	Reddish grey	32.2	20	12.2	22.8	18.2	6	26.8	17.6	9.2	5.4	20.1493	2.4	13.6364	3
September 10th	Cold	Mild	14	3	0	180	Lower	Soft	Fossiliferous sandstone	4	36	Thin	7.5	742	0.88	1	2.5Y 7/4	Light yellow	32.6	18.5	14.1	22.9	18.6	4.5	29.1	17	12.1	3.5	12.0275	1.5	8.82353	2
September 10th	Cold	Mild	14	3	0	180	Lower	Soft	Fossiliferous sandstone	4	31	Thin	6.9	580	0.94	0	2.5Y 7/6	Yellowish brown	33.3	17.5	15.8	22.9	19.3	3.5	28.8	15	13.8	4.5	15.625	2.5	16.6667	2
September 10th	Cold	Mild	14	3	0	180	Lower	Soft	White limestone	6	15	Thin	5.9	564	0.92	2	2.5Y 8/1	Light grey	31.2	17.3	13.9	19.6	17.2	3.3	25.5	15.6	9.9	5.7	22.3529	1.7	10.8974	4
September 10th	Cold	Mild	14	3	0	180	Lower	Soft	Orange limestone	5	22	Intermediate	7.6	584	0.94	0	2.5Y 7/4	Light yellow	31.7	18.7	13	20.9	17.7	4.7	27.8	16.2	11.6	3.9	14.0288	2.5	15.4321	1.4
September 10th	Cold	Mild	14	3	0	180	Lower	Hard	Grey siltstone	2	7	Thick	12.3	544	0.95	0	N 7/0	Greyish white	25	19.4	5.6	22.6	11	5.4	22	16.4	5.6	3	13.6364	3	18.2927	0
September 10th	Cold	Mild	14	3	0	180	Lower	Soft	Orange limestone	5	23	Thin	6.1	792	0.94	0	5Y 8/3	Pale yellow	30.2	18.9	11.3	20.5	16.2	4.9	25.1	15.7	9.4	5.1	20.3187	3.2	20.3822	1.9
September 10th	Cold	Mild	14	3	0	180	Lower	Hard	Purple siltstone	1	2	Thick	14.3	456	0.94	0	7.5YR 5/1	Brownish grey	30.5	20.2	10.3	23.8	16.5	6.2	26.8	16.4	10.4	3.7	13.806	3.8	23.1707	-0.1
September 10th	Cold	Mild	14	3	0	180	Lower	Soft	White limestone	6	13	Intermediate	9.4	492	0.91	2	2.5Y 8/1	Light grey	25.9	16.2	9.7	21	11.9	2.2	28.6	14	14.6	-2.7	-9.44056	2.2	15.7143	-4.9
September 10th	Cold	Mild	14	3	0	180	Lower	Hard	Grey siltstone	2	11	Thin	7.3	696	0.92	0	N 7/0	Greyish white	35.3	21.6	13.7	23.6	21.3	7.6	30.7	18.5	12.2	4.6	14.9837	3.1	16.7568	1.5
September 10th	Cold	Mild	14	3	0	180	Lower	Hard	Purple siltstone	1	1	Intermediate	11.2	408	0.94	0	2.5YR 5/1	Reddish grey	35	22.7	12.3	25.5	21	8.7	29.9	18.6	11.3	5.1	17.0569	4.1	22.043	1
September 10th	Cold	Mild	14	3	0	180	Lower	Hard	Grey siltstone	2	10	Intermediate	8.4	556	0.94	0	2.5GY 7/1	Light olive grey	33.1	23.4	9.7	24.8	19.1	9.4	28.9	19.6	9.3	4.2	14.5329	3.8	19.3878	0.4
September 10th	Cold	Mild	14	3	0	180	Lower	Soft	Orange limestone	5	19	Intermediate	6.8	528	0.92	0	2.5Y 6/4	Dull yellow	26.1	20.1	6	21.4	12.1	6.1	28	17.5	10.5	-1.9	-6.78571	2.6	14.8571	-4.5
September 10th	Cold	Mild	14	3	0	180	Lower	Soft	White limestone	6	14	Thin	6.5	816	0.95	2	2.5Y 8/1	Light grey	31.7	16.2	15.5	20.4	17.7	2.2	27.6	13.3	14.3	4.1	14.8551	2.9	21.8045	1.2
September 10th	Cold	Mild	14	3	0	180	Lower	Soft	Fossiliferous sandstone	4	35	Thick	15	664	0.91	1	2.5Y 5/6	Yellowish brown	31.8	17.7	14.1	19	17.8	3.7	26	15.3	10.7	5.8	22.3077	2.4	15.6863	3.4
September 10th	Cold	Mild	14	3	0	180	Lower	Hard	Purple siltstone	1	5	Thin	6.5	496	0.97	0	10R 6/1	Reddish grey	32.9	23.3	9.6	25.9	18.9	9.3	28.5	20.4	8.1	4.4	15.4386	2.9	14.2157	1.5
September 10th	Cold	Mild	14	3	0	180	Lower	Hard	Quartzite	3	28	Intermediate	12.6	464	0.92	0	10YR 8/1	Light grey	24.2	17.3	6.9	20.9	10.2	3.3	20.2	15.1	5.1	4	19.802	2.2	14.5695	1.8
September 10th	Cold	Mild	14	3	0	180	Lower	Soft	Orange limestone	5	24	Thin	6	588	0.94	1	2.5Y 7/4	Light yellow	30.9	18.8	12.1	22	16.9	4.8	22.4	16.9	5.5	8.5	37.9464	1.9	11.2426	6.6
September 10th	Cold	Mild	14	3	0	180	Lower	Hard	Quartzite	3	27	Intermediate	11.1	448	0.94	0	10YR 8/1	Light grey	23	16.6	6.4	19.7	9	2.6	19.8	13.7	6.1	3.2	16.1616	2.9	21.1679	0.3
September 10th	Cold	Mild	14	3	0	180	Lower	Soft	White limestone	6	18	Thick	12	504	0.81	0	2.5Y 8/1	Light grey	23	16.4	6.6	17.8	9	2.4	20	12.9	7.1	3	15	3.5	27.1318	-0.5
September 10th	Cold	Mild	14	3	0	180	Lower	Soft	Fossiliferous sandstone	4	34	Thick	13.9	520	0.95	0	2.5Y 7/4	Light yellow	25.6	17.1	8.5	20.4	11.6	3.1	23.4	16.2	7.2	2.2	9.40171	0.9	5.55556	1.3
September 10th	Cold	Mild	14	3	0	180	Lower	Hard	Purple siltstone	1	6	Thick	13.5	516	1	0	7.5R 5/1	Reddish grey	27	19.3	7.7	22.7	13	5.3	25	17	8	2	8	2.3	13.5294	-0.3
September 10th	Cold	Mild	14	3	0	180	Lower	Hard	Quartzite	3	26	Thin	7.9	496	0.94	0	10YR 7/2	Greyish yellow brown	28.1	19.1	9	23.3	14.1	5.1	28	17.3	10.7	0.1	0.357143	1.8	10.4046	-1.7
September 10th	Cold	Mild	14	3	0	180	Lower	Soft	White limestone	6	17	Intermediate	9.5	448	0.92	1	2.5Y 8/1	Light grey	23.8	16.1	7.7	17.6	9.8	2.1	20.2	14.8	5.4	3.6	17.8218	1.3	8.78378	2.3
September 10th	Cold	Mild	14	3	0	180	Lower	Hard	Grey siltstone	2	8	Intermediate	8.1	584	0.97	0	2.5GY 6/1	Olive grey	30	20.2	9.8	24.4	16	6.2	25.7	18.3	7.4	4.3	16.7315	1.9	10.3825	2.4
September 10th	Cold	Mild	14	3	0	180	Lower	Soft	Fossiliferous sandstone	4	32	Intermediate	7.9	536	0.91	0	2.5Y 7/4	Light yellow	28.7	19.5	9.2	22.5	14.7	5.5	22.8	16.9	5.9	5.9	25.8772	2.6	15.3846	3.3
September 10th	Cold	Mild	15	3	0	240	Upper	Hard	Purple siltstone	1	3	Intermediate	11.6	424	0.91	0	10R 5/1	Reddish grey	35.8	23.6	12.2	30.8	20.8	8.6	35.6	22.2	13.4	0.2	0.561798	1.4	6.30631	-1.2
September 10th	Cold	Mild	15	3	0	240	Upper	Soft	Orange limestone	5	21	Thick	12.4	676	0.88	1	2.5Y 8/4	Pale yellow	30.7	18.3	12.4	23.5	15.7	3.3	30.5	17.9	12.6	0.2	0.655738	0.4	2.23464	-0.2
September 10th	Cold	Mild	15	3	0	240	Upper	Hard	Quartzite	3	25	Thin	9.6	636	0.87	0	10YR 6/2	Greyish yellow brown	30.6	19.3	11.3	25	15.6	4.3	29.2	18.5	10.7	1.4	4.79452	0.8	4.32432	0.6
September 10th	Cold	Mild	15	3	0	240	Upper	Soft	Fossiliferous sandstone	4	33	Intermediate	8.6	672	0.85	0	2.5Y 6/4	Dull yellow	32.6	19.3	13.3	28	17.6	4.3	32.5	17.7	14.8	0.1	0.307692	1.6	9.03955	-1.5
September 10th	Cold	Mild	15	3	0	240	Upper	Hard	Grey siltstone	2	12	Thin	7.5	580	0.95	0	N 6/0	Grey	37.8	25.9	11.9	31.6	22.8	10.9	36.1	25.1	11	1.7	4.70914	0.8	3.18725	0.9
September 10th	Cold	Mild	15	3	0	240	Upper	Soft	Orange limestone	5	20	Thick	11.7	356	0.92	0	10YR 8/3	Light yellow	33.5	19	14.5	27.4	18.5	4	31.7	17.4	14.3	1.8	5.67823	1.6	9.1954	0.2
September 10th	Cold	Mild	15	3	0	240	Upper	Hard	Quartzite	3	29	Thick	14.1	400	0.94	1	10YR 7/2	Greyish yellow brown	27.4	18.4	9	24.6	12.4	3.4	26.1	16.2	9.9	1.3	4.98084	2.2	13.5802	-0.9
September 10th	Cold	Mild	15	3	0	240	Upper	Soft	White limestone	6	16	Thick	12.3	460	0.94	1	2.5Y 8/1	Light grey	27.8	19.5	8.3	24.5	12.8	4.5	27.5	16.5	11	0.3	1.09091	3	18.1818	-2.7
September 10th	Cold	Mild	15	3	0	240	Upper	Hard	Grey siltstone	2	9	Thick	12.6	624	0.92	0	2.5GY 7/1	Light olive grey	34.4	21.3	13.1	29.5	19.4	6.3	33.5	20.3	13.2	0.9	2.68657	1	4.92611	-0.1
September 10th	Cold	Mild	15	3	0	240	Upper	Hard	Quartzite	3	30	Thick	14.3	376	0.96	0	10YR 8/1	Light grey	25.9	15.8	10.1	20.5	10.9	0.8	26.1	14.5	11.6	-0.2	-0.766284	1.3	8.96552	-1.5
September 10th	Cold	Mild	15	3	0	240	Upper	Hard	Purple siltstone	1	4	Thin	6.4	608	0.94	0	10R 6/1	Reddish grey	33.3	21.4	11.9	27.5	18.3	6.4	31.4	20.1	11.3	1.9	6.05096	1.3	6.46766	0.6
September 10th	Cold	Mild	15	3	0	240	Upper	Soft	Fossiliferous sandstone	4	36	Thin	7.5	732	0.86	0	2.5Y 7/4	Light yellow	34.3	21.8	12.5	27.9	19.3	6.8	32.7	19	13.7	1.6	4.89297	2.8	14.7368	-1.2
September 10th	Cold	Mild	15	3	0	240	Upper	Soft	Fossiliferous sandstone	4	31	Thin	6.9	588	0.94	0	2.5Y 7/6	Yellowish brown	36	20.9	15.1	30.3	21	5.9	33.2	18.5	14.7	2.8	8.43373	2.4	12.973	0.4
September 10th	Cold	Mild	15	3	0	240	Upper	Soft	White limestone	6	15	Thin	5.9	612	0.82	1	2.5Y 8/1	Light grey	30.5	18.8	11.7	24.8	15.5	3.8	29.8	17.5	12.3	0.7	2.34899	1.3	7.42857	-0.6
September 10th	Cold	Mild	15	3	0	240	Upper	Soft	Orange limestone	5	22	Intermediate	7.6	632	0.94	0	2.5Y 7/4	Light yellow	34.5	22.1	12.4	28.1	19.5	7.1	33.9	20.6	13.3	0.6	1.76991	1.5	7.28155	-0.9
September 10th	Cold	Mild	15	3	0	240	Upper	Hard	Grey siltstone	2	7	Thick	12.3	436	0.94	0	N 7/0	Greyish white	36.9	20.6	16.3	30.3	21.9	5.6	33.8	19.2	14.6	3.1	9.1716	1.4	7.29167	1.7
September 10th	Cold	Mild	15	3	0	240	Upper	Soft	Orange limestone	5	23	Thin	6.1	808	0.91	0	5Y 8/3	Pale yellow	30.2	21	9.2	27.7	15.2	6	30.4	19.7	10.7	-0.2	-0.657895	1.3	6.59898	-1.5
September 10th	Cold	Mild	15	3	0	240	Upper	Hard	Purple siltstone	1	2	Thick	14.3	484	0.97	0	7.5YR 5/1	Brownish grey	36.5	23.4	13.1	30.2	21.5	8.4	35.6	23.4	12.2	0.9	2.52809	0	0	0.9
September 10th	Cold	Mild	15	3	0	240	Upper	Soft	White limestone	6	13	Intermediate	9.4	592	0.91	2	2.5Y 8/1	Light grey	28.4	16.1	12.3	20.9	13.4	1.1	28.5	14.7	13.8	-0.1	-0.350877	1.4	9.52381	-1.5
September 10th	Cold	Mild	15	3	0	240	Upper	Hard	Grey siltstone	2	11	Thin	7.3	688	0.94	0	N 7/0	Greyish white	34.9	22.1	12.8	31.4	19.9	7.1	34.9	21.8	13.1	0	0	0.3	1.37615	-0.3
September 10th	Cold	Mild	15	3	0	240	Upper	Hard	Purple siltstone	1	1	Intermediate	11.2	384	0.92	0	2.5YR 5/1	Reddish grey	36	24.1	11.9	30	21	9.1	34.9	22.4	12.5	1.1	3.15186	1.7	7.58929	-0.6
September 10th	Cold	Mild	15	3	0	240	Upper	Hard	Grey siltstone	2	10	Intermediate	8.4	552	0.94	0	2.5GY 7/1	Light olive grey	34	22.5	11.5	28.9	19	7.5	33.5	22.3	11.2	0.5	1.49254	0.2	0.896861	0.3
September 10th	Cold	Mild	15	3	0	240	Upper	Soft	Orange limestone	5	19	Intermediate	6.8	604	0.94	0	2.5Y 6/4	Dull yellow	32.8	22.5	10.3	27.3	17.8	7.5	32.4	19.8	12.6	0.4	1.23457	2.7	13.6364	-2.3
September 10th	Cold	Mild	15	3	0	240	Upper	Soft	White limestone	6	14	Thin	6.5	830	0.97	4	2.5Y 8/1	Light grey	30.5	20.1	10.4	24.7	15.5	5.1	29.9	17.8	12.1	0.6	2.00669	2.3	12.9213	-1.7
September 10th	Cold	Mild	15	3	0	240	Upper	Soft	Fossiliferous sandstone	4	35	Thick	15	704	0.91	0	2.5Y 5/6	Yellowish brown	36.3	24.9	11.4	32.8	21.3	9.9	34.7	24.3	10.4	1.6	4.61095	0.6	2.46914	1
September 10th	Cold	Mild	15	3	0	240	Upper	Hard	Purple siltstone	1	5	Thin	6.5	508	0.92	0	10R 6/1	Reddish grey	36.8	23.4	13.4	31.4	21.8	8.4	34.9	21.2	13.7	1.9	5.44413	2.2	10.3774	-0.3
September 10th	Cold	Mild	15	3	0	240	Upper	Hard	Quartzite	3	28	Intermediate	12.6	328	0.95	0	10YR 8/1	Light grey	23.8	16.4	7.4	20	8.8	1.4	23.8	15.1	8.7	0	0	1.3	8.60927	-1.3
September 10th	Cold	Mild	15	3	0	240	Upper	Soft	Orange limestone	5	24	Thin	6	620	0.94	0	2.5Y 7/4	Light yellow	32.4	21.3	11.1	25.8	17.4	6.3	31.2	18.7	12.5	1.2	3.84615	2.6	13.9037	-1.4
September 10th	Cold	Mild	15	3	0	240	Upper	Hard	Quartzite	3	27	Intermediate	11.1	444	0.94	0	10YR 8/1	Light grey	25.4	18.1	7.3	21.8	10.4	3.1	22.2	15.9	6.3	3.2	14.4144	2.2	13.8365	1
September 10th	Cold	Mild	15	3	0	240	Upper	Soft	White limestone	6	18	Thick	12	544	0.85	1	2.5Y 8/1	Light grey	31.3	17.5	13.8	24.5	16.3	2.5	29.3	20.3	9	2	6.82594	-2.8	-13.7931	4.8
September 10th	Cold	Mild	15	3	0	240	Upper	Soft	Fossiliferous sandstone	4	34	Thick	13.9	436	0.76	0	2.5Y 7/4	Light yellow	33.8	17.6	16.2	29.5	18.8	2.6	31.6	16.9	14.7	2.2	6.96203	0.7	4.14201	1.5
September 10th	Cold	Mild	15	3	0	240	Upper	Hard	Purple siltstone	1	6	Thick	13.5	596	0.94	0	7.5R 5/1	Reddish grey	37.2	24.3	12.9	32.4	22.2	9.3	33.6	21.8	11.8	3.6	10.7143	2.5	11.4679	1.1
September 10th	Cold	Mild	15	3	0	240	Upper	Hard	Quartzite	3	26	Thin	7.9	500	0.97	0	10YR 7/2	Greyish yellow brown	30.8	19.4	11.4	23.6	15.8	4.4	27.6	18.3	9.3	3.2	11.5942	1.1	6.01093	2.1
September 10th	Cold	Mild	15	3	0	240	Upper	Soft	White limestone	6	17	Intermediate	9.5	444	0.95	0	2.5Y 8/1	Light grey	30.8	17.8	13	23	15.8	2.8	26.3	13.3	13	4.5	17.1103	4.5	33.8346	0
September 10th	Cold	Mild	15	3	0	240	Upper	Hard	Grey siltstone	2	8	Intermediate	8.1	592	0.97	0	2.5GY 6/1	Olive grey	34.3	23.5	10.8	29.7	19.3	8.5	31.4	19.8	11.6	2.9	9.23567	3.7	18.6869	-0.8
September 10th	Cold	Mild	15	3	0	240	Upper	Soft	Fossiliferous sandstone	4	32	Intermediate	7.9	524	0.92	0	2.5Y 7/4	Light yellow	32	22.7	9.3	27.2	17	7.7	29.8	18.9	10.9	2.2	7.38255	3.8	20.1058	-1.6
September 10th	Cold	Mild	15	3	0	240	Lower	Hard	Purple siltstone	1	3	Intermediate	11.6	354	0.91	0	10R 5/1	Reddish grey	28.8	18.8	10	24	13.8	3.8	30	18.9	11.1	-1.2	-4	-0.1	-0.529101	-1.1
September 10th	Cold	Mild	15	3	0	240	Lower	Soft	Orange limestone	5	21	Thick	12.4	608	0.91	0	2.5Y 8/4	Pale yellow	22.3	14.7	7.6	17.9	7.3	-0.3	23.7	15.6	8.1	-1.4	-5.90717	-0.9	-5.76923	-0.5
September 10th	Cold	Mild	15	3	0	240	Lower	Hard	Quartzite	3	25	Thin	9.6	584	0.92	0	10YR 6/2	Greyish yellow brown	30	15.4	14.6	21.3	15	0.4	29.3	16.6	12.7	0.7	2.38908	-1.2	-7.22892	1.9
September 10th	Cold	Mild	15	3	0	240	Lower	Soft	Fossiliferous sandstone	4	33	Intermediate	8.6	680	0.91	0	2.5Y 6/4	Dull yellow	29.9	15.9	14	23.4	14.9	0.9	30.9	16.7	14.2	-1	-3.23625	-0.8	-4.79042	-0.2
September 10th	Cold	Mild	15	3	0	240	Lower	Hard	Grey siltstone	2	12	Thin	7.5	576	0.94	0	N 6/0	Grey	35.7	22.6	13.1	24.4	20.7	7.6	35.5	23.3	12.2	0.2	0.56338	-0.7	-3.00429	0.9
September 10th	Cold	Mild	15	3	0	240	Lower	Soft	Orange limestone	5	20	Thick	11.7	420	0.97	0	10YR 8/3	Light yellow	22.9	15.2	7.7	18	7.9	0.2	21.8	14.4	7.4	1.1	5.04587	0.8	5.55556	0.3
September 10th	Cold	Mild	15	3	0	240	Lower	Hard	Quartzite	3	29	Thick	14.1	368	0.94	0	10YR 7/2	Greyish yellow brown	23.7	15.2	8.5	19.5	8.7	0.2	22.6	13.3	9.3	1.1	4.86726	1.9	14.2857	-0.8
September 10th	Cold	Mild	15	3	0	240	Lower	Soft	White limestone	6	16	Thick	12.3	412	0.94	0	2.5Y 8/1	Light grey	23.9	15.2	8.7	17.7	8.9	0.2	22.6	14.4	8.2	1.3	5.75221	0.8	5.55556	0.5
September 10th	Cold	Mild	15	3	0	240	Lower	Hard	Grey siltstone	2	9	Thick	12.6	532	0.97	0	2.5GY 7/1	Light olive grey	30.8	19.9	10.9	22.7	15.8	4.9	25.3	17.5	7.8	5.5	21.7391	2.4	13.7143	3.1
September 10th	Cold	Mild	15	3	0	240	Lower	Hard	Quartzite	3	30	Thick	14.3	588	0.9	0	10YR 8/1	Light grey	25.3	15.9	9.4	20.1	10.3	0.9	25.4	14.3	11.1	-0.1	-0.393701	1.6	11.1888	-1.7
September 10th	Cold	Mild	15	3	0	240	Lower	Hard	Purple siltstone	1	4	Thin	6.4	608	0.95	0	10R 6/1	Reddish grey	31.9	21.2	10.7	24.8	16.9	6.2	32.2	20	12.2	-0.3	-0.931677	1.2	6	-1.5
September 10th	Cold	Mild	15	3	0	240	Lower	Soft	Fossiliferous sandstone	4	36	Thin	7.5	742	0.88	1	2.5Y 7/4	Light yellow	32.1	20.3	11.8	23.2	17.1	5.3	32.6	18.5	14.1	-0.5	-1.53374	1.8	9.72973	-2.3
September 10th	Cold	Mild	15	3	0	240	Lower	Soft	Fossiliferous sandstone	4	31	Thin	6.9	580	0.94	0	2.5Y 7/6	Yellowish brown	33.9	18.5	15.4	23	18.9	3.5	33.3	17.5	15.8	0.6	1.8018	1	5.71429	-0.4
September 10th	Cold	Mild	15	3	0	240	Lower	Soft	White limestone	6	15	Thin	5.9	564	0.92	2	2.5Y 8/1	Light grey	31.5	18.3	13.2	20.6	16.5	3.3	31.2	17.3	13.9	0.3	0.961538	1	5.78035	-0.7
September 10th	Cold	Mild	15	3	0	240	Lower	Soft	Orange limestone	5	22	Intermediate	7.6	584	0.94	0	2.5Y 7/4	Light yellow	33.5	20.3	13.2	22.3	18.5	5.3	31.7	18.7	13	1.8	5.67823	1.6	8.55615	0.2
September 10th	Cold	Mild	15	3	0	240	Lower	Hard	Grey siltstone	2	7	Thick	12.3	544	0.95	0	N 7/0	Greyish white	28.4	20.5	7.9	24.8	13.4	5.5	25	19.4	5.6	3.4	13.6	1.1	5.6701	2.3
September 10th	Cold	Mild	15	3	0	240	Lower	Soft	Orange limestone	5	23	Thin	6.1	792	0.94	0	5Y 8/3	Pale yellow	30.9	20.7	10.2	22.5	15.9	5.7	30.2	18.9	11.3	0.7	2.31788	1.8	9.52381	-1.1
September 10th	Cold	Mild	15	3	0	240	Lower	Hard	Purple siltstone	1	2	Thick	14.3	456	0.94	0	7.5YR 5/1	Brownish grey	31.3	20.6	10.7	25	16.3	5.6	30.5	20.2	10.3	0.8	2.62295	0.4	1.9802	0.4
September 10th	Cold	Mild	15	3	0	240	Lower	Soft	White limestone	6	13	Intermediate	9.4	492	0.91	2	2.5Y 8/1	Light grey	29.3	15.9	13.4	20.9	14.3	0.9	25.9	16.2	9.7	3.4	13.1274	-0.3	-1.85185	3.7
September 10th	Cold	Mild	15	3	0	240	Lower	Hard	Grey siltstone	2	11	Thin	7.3	696	0.92	0	N 7/0	Greyish white	34.9	21.6	13.3	23.8	19.9	6.6	35.3	21.6	13.7	-0.4	-1.13314	0	0	-0.4
September 10th	Cold	Mild	15	3	0	240	Lower	Hard	Purple siltstone	1	1	Intermediate	11.2	408	0.94	0	2.5YR 5/1	Reddish grey	35.1	23.4	11.7	25.4	20.1	8.4	35	22.7	12.3	0.1	0.285714	0.7	3.0837	-0.6
September 10th	Cold	Mild	15	3	0	240	Lower	Hard	Grey siltstone	2	10	Intermediate	8.4	556	0.94	0	2.5GY 7/1	Light olive grey	33.3	22.8	10.5	24.9	18.3	7.8	33.1	23.4	9.7	0.2	0.60423	-0.6	-2.5641	0.8
September 10th	Cold	Mild	15	3	0	240	Lower	Soft	Orange limestone	5	19	Intermediate	6.8	528	0.92	0	2.5Y 6/4	Dull yellow	31.7	20	11.7	22.3	16.7	5	26.1	20.1	6	5.6	21.4559	-0.1	-0.497512	5.7
September 10th	Cold	Mild	15	3	0	240	Lower	Soft	White limestone	6	14	Thin	6.5	816	0.95	2	2.5Y 8/1	Light grey	31.3	17.1	14.2	19.3	16.3	2.1	31.7	16.2	15.5	-0.4	-1.26183	0.9	5.55556	-1.3
September 10th	Cold	Mild	15	3	0	240	Lower	Soft	Fossiliferous sandstone	4	35	Thick	15	664	0.91	1	2.5Y 5/6	Yellowish brown	33.9	18.4	15.5	21	18.9	3.4	31.8	17.7	14.1	2.1	6.60377	0.7	3.9548	1.4
September 10th	Cold	Mild	15	3	0	240	Lower	Hard	Purple siltstone	1	5	Thin	6.5	496	0.97	0	10R 6/1	Reddish grey	33.8	25.3	8.5	27.5	18.8	10.3	32.9	23.3	9.6	0.9	2.73556	2	8.58369	-1.1
September 10th	Cold	Mild	15	3	0	240	Lower	Hard	Quartzite	3	28	Intermediate	12.6	464	0.92	0	10YR 8/1	Light grey	23	15.7	7.3	20.6	8	0.7	24.2	17.3	6.9	-1.2	-4.95868	-1.6	-9.24855	0.4
September 10th	Cold	Mild	15	3	0	240	Lower	Soft	Orange limestone	5	24	Thin	6	588	0.94	1	2.5Y 7/4	Light yellow	31.8	19.7	12.1	22.8	16.8	4.7	30.9	18.8	12.1	0.9	2.91262	0.9	4.78723	0
September 10th	Cold	Mild	15	3	0	240	Lower	Hard	Quartzite	3	27	Intermediate	11.1	448	0.94	0	10YR 8/1	Light grey	24.6	17.3	7.3	19.8	9.6	2.3	23	16.6	6.4	1.6	6.95652	0.7	4.21687	0.9
September 10th	Cold	Mild	15	3	0	240	Lower	Soft	White limestone	6	18	Thick	12	504	0.81	0	2.5Y 8/1	Light grey	25.9	17.4	8.5	19.7	10.9	2.4	23	16.4	6.6	2.9	12.6087	1	6.09756	1.9
September 10th	Cold	Mild	15	3	0	240	Lower	Soft	Fossiliferous sandstone	4	34	Thick	13.9	520	0.95	0	2.5Y 7/4	Light yellow	27.6	17.4	10.2	21.6	12.6	2.4	25.6	17.1	8.5	2	7.8125	0.3	1.75439	1.7
September 10th	Cold	Mild	15	3	0	240	Lower	Hard	Purple siltstone	1	6	Thick	13.5	516	1	0	7.5R 5/1	Reddish grey	29	20	9	23.2	14	5	27	19.3	7.7	2	7.40741	0.7	3.62694	1.3
September 10th	Cold	Mild	15	3	0	240	Lower	Hard	Quartzite	3	26	Thin	7.9	496	0.94	0	10YR 7/2	Greyish yellow brown	28	19.8	8.2	25.3	13	4.8	28.1	19.1	9	-0.1	-0.355872	0.7	3.66492	-0.8
September 10th	Cold	Mild	15	3	0	240	Lower	Soft	White limestone	6	17	Intermediate	9.5	448	0.92	1	2.5Y 8/1	Light grey	25	16.6	8.4	20.2	10	1.6	23.8	16.1	7.7	1.2	5.04202	0.5	3.10559	0.7
September 10th	Cold	Mild	15	3	0	240	Lower	Hard	Grey siltstone	2	8	Intermediate	8.1	584	0.97	0	2.5GY 6/1	Olive grey	32.6	21.9	10.7	24.9	17.6	6.9	30	20.2	9.8	2.6	8.66667	1.7	8.41584	0.9
September 10th	Cold	Mild	15	3	0	240	Lower	Soft	Fossiliferous sandstone	4	32	Intermediate	7.9	536	0.91	0	2.5Y 7/4	Light yellow	27.2	20	7.2	23.5	12.2	5	28.7	19.5	9.2	-1.5	-5.22648	0.5	2.5641	-2
September 10th	Cold	Mild	16	3	0	300	Upper	Hard	Purple siltstone	1	3	Intermediate	11.6	424	0.91	0	10R 5/1	Reddish grey	37.3	26.2	11.1	34.2	21.3	10.2	35.8	23.6	12.2	1.5	4.18994	2.6	11.0169	-1.1
September 10th	Cold	Mild	16	3	0	300	Upper	Soft	Orange limestone	5	21	Thick	12.4	676	0.88	1	2.5Y 8/4	Pale yellow	31.2	18.6	12.6	25.8	15.2	2.6	30.7	18.3	12.4	0.5	1.62866	0.3	1.63934	0.2
September 10th	Cold	Mild	16	3	0	300	Upper	Hard	Quartzite	3	25	Thin	9.6	636	0.87	0	10YR 6/2	Greyish yellow brown	31	19.6	11.4	25.3	15	3.6	30.6	19.3	11.3	0.4	1.30719	0.3	1.5544	0.1
September 10th	Cold	Mild	16	3	0	300	Upper	Soft	Fossiliferous sandstone	4	33	Intermediate	8.6	672	0.85	0	2.5Y 6/4	Dull yellow	32.3	18.3	14	29.7	16.3	2.3	32.6	19.3	13.3	-0.3	-0.920245	-1	-5.18135	0.7
September 10th	Cold	Mild	16	3	0	300	Upper	Hard	Grey siltstone	2	12	Thin	7.5	580	0.95	0	N 6/0	Grey	36.9	25.6	11.3	31	20.9	9.6	37.8	25.9	11.9	-0.9	-2.38095	-0.3	-1.1583	-0.6
September 10th	Cold	Mild	16	3	0	300	Upper	Soft	Orange limestone	5	20	Thick	11.7	356	0.92	0	10YR 8/3	Light yellow	30.9	18.6	12.3	26.6	14.9	2.6	33.5	19	14.5	-2.6	-7.76119	-0.4	-2.10526	-2.2
September 10th	Cold	Mild	16	3	0	300	Upper	Hard	Quartzite	3	29	Thick	14.1	400	0.94	1	10YR 7/2	Greyish yellow brown	29.5	18.3	11.2	24.3	13.5	2.3	27.4	18.4	9	2.1	7.66423	-0.1	-0.543478	2.2
September 10th	Cold	Mild	16	3	0	300	Upper	Soft	White limestone	6	16	Thick	12.3	460	0.94	1	2.5Y 8/1	Light grey	26.9	17.6	9.3	23.6	10.9	1.6	27.8	19.5	8.3	-0.9	-3.23741	-1.9	-9.74359	1
September 10th	Cold	Mild	16	3	0	300	Upper	Hard	Grey siltstone	2	9	Thick	12.6	624	0.92	0	2.5GY 7/1	Light olive grey	33.3	22.5	10.8	27.8	17.3	6.5	34.4	21.3	13.1	-1.1	-3.19767	1.2	5.6338	-2.3
September 10th	Cold	Mild	16	3	0	300	Upper	Hard	Quartzite	3	30	Thick	14.3	376	0.96	0	10YR 8/1	Light grey	24.7	15.5	9.2	21	8.7	-0.5	25.9	15.8	10.1	-1.2	-4.6332	-0.3	-1.89873	-0.9
September 10th	Cold	Mild	16	3	0	300	Upper	Hard	Purple siltstone	1	4	Thin	6.4	608	0.94	0	10R 6/1	Reddish grey	31.2	20.9	10.3	25.9	15.2	4.9	33.3	21.4	11.9	-2.1	-6.30631	-0.5	-2.33645	-1.6
September 10th	Cold	Mild	16	3	0	300	Upper	Soft	Fossiliferous sandstone	4	36	Thin	7.5	732	0.86	0	2.5Y 7/4	Light yellow	30.4	21.2	9.2	26	14.4	5.2	34.3	21.8	12.5	-3.9	-11.3703	-0.6	-2.75229	-3.3
September 10th	Cold	Mild	16	3	0	300	Upper	Soft	Fossiliferous sandstone	4	31	Thin	6.9	588	0.94	0	2.5Y 7/6	Yellowish brown	33.8	20.2	13.6	28.8	17.8	4.2	36	20.9	15.1	-2.2	-6.11111	-0.7	-3.34928	-1.5
September 10th	Cold	Mild	16	3	0	300	Upper	Soft	White limestone	6	15	Thin	5.9	612	0.82	1	2.5Y 8/1	Light grey	29.3	18.1	11.2	24.3	13.3	2.1	30.5	18.8	11.7	-1.2	-3.93443	-0.7	-3.7234	-0.5
September 10th	Cold	Mild	16	3	0	300	Upper	Soft	Orange limestone	5	22	Intermediate	7.6	632	0.94	0	2.5Y 7/4	Light yellow	33.4	20.4	13	28.6	17.4	4.4	34.5	22.1	12.4	-1.1	-3.18841	-1.7	-7.69231	0.6
September 10th	Cold	Mild	16	3	0	300	Upper	Hard	Grey siltstone	2	7	Thick	12.3	436	0.94	0	N 7/0	Greyish white	34.9	21.5	13.4	28.5	18.9	5.5	36.9	20.6	16.3	-2	-5.42005	0.9	4.36893	-2.9
September 10th	Cold	Mild	16	3	0	300	Upper	Soft	Orange limestone	5	23	Thin	6.1	808	0.91	0	5Y 8/3	Pale yellow	29.5	21.4	8.1	26.8	13.5	5.4	30.2	21	9.2	-0.7	-2.31788	0.4	1.90476	-1.1
September 10th	Cold	Mild	16	3	0	300	Upper	Hard	Purple siltstone	1	2	Thick	14.3	484	0.97	0	7.5YR 5/1	Brownish grey	36.3	22.7	13.6	30.3	20.3	6.7	36.5	23.4	13.1	-0.2	-0.547945	-0.7	-2.99145	0.5
September 10th	Cold	Mild	16	3	0	300	Upper	Soft	White limestone	6	13	Intermediate	9.4	592	0.91	2	2.5Y 8/1	Light grey	26.2	16	10.2	20.6	10.2	0	28.4	16.1	12.3	-2.2	-7.74648	-0.1	-0.621118	-2.1
September 10th	Cold	Mild	16	3	0	300	Upper	Hard	Grey siltstone	2	11	Thin	7.3	688	0.94	0	N 7/0	Greyish white	32.7	20.9	11.8	29.6	16.7	4.9	34.9	22.1	12.8	-2.2	-6.30372	-1.2	-5.42986	-1
September 10th	Cold	Mild	16	3	0	300	Upper	Hard	Purple siltstone	1	1	Intermediate	11.2	384	0.92	0	2.5YR 5/1	Reddish grey	34.3	22.9	11.4	29.9	18.3	6.9	36	24.1	11.9	-1.7	-4.72222	-1.2	-4.97925	-0.5
September 10th	Cold	Mild	16	3	0	300	Upper	Hard	Grey siltstone	2	10	Intermediate	8.4	552	0.94	0	2.5GY 7/1	Light olive grey	31.9	20.9	11	28.4	15.9	4.9	34	22.5	11.5	-2.1	-6.17647	-1.6	-7.11111	-0.5
September 10th	Cold	Mild	16	3	0	300	Upper	Soft	Orange limestone	5	19	Intermediate	6.8	604	0.94	0	2.5Y 6/4	Dull yellow	31.7	21.2	10.5	28.2	15.7	5.2	32.8	22.5	10.3	-1.1	-3.35366	-1.3	-5.77778	0.2
September 10th	Cold	Mild	16	3	0	300	Upper	Soft	White limestone	6	14	Thin	6.5	830	0.97	4	2.5Y 8/1	Light grey	27.9	19.9	8	23.8	11.9	3.9	30.5	20.1	10.4	-2.6	-8.52459	-0.2	-0.995025	-2.4
September 10th	Cold	Mild	16	3	0	300	Upper	Soft	Fossiliferous sandstone	4	35	Thick	15	704	0.91	0	2.5Y 5/6	Yellowish brown	34.6	23.7	10.9	32.2	18.6	7.7	36.3	24.9	11.4	-1.7	-4.6832	-1.2	-4.81928	-0.5
September 10th	Cold	Mild	16	3	0	300	Upper	Hard	Purple siltstone	1	5	Thin	6.5	508	0.92	0	10R 6/1	Reddish grey	34.7	23.3	11.4	30.5	18.7	7.3	36.8	23.4	13.4	-2.1	-5.70652	-0.1	-0.42735	-2
September 10th	Cold	Mild	16	3	0	300	Upper	Hard	Quartzite	3	28	Intermediate	12.6	328	0.95	0	10YR 8/1	Light grey	22	15.2	6.8	19.7	6	-0.8	23.8	16.4	7.4	-1.8	-7.56303	-1.2	-7.31707	-0.6
September 10th	Cold	Mild	16	3	0	300	Upper	Soft	Orange limestone	5	24	Thin	6	620	0.94	0	2.5Y 7/4	Light yellow	32.6	21	11.6	25.9	16.6	5	32.4	21.3	11.1	0.2	0.617284	-0.3	-1.40845	0.5
September 10th	Cold	Mild	16	3	0	300	Upper	Hard	Quartzite	3	27	Intermediate	11.1	444	0.94	0	10YR 8/1	Light grey	25.3	17.5	7.8	21.8	9.3	1.5	25.4	18.1	7.3	-0.1	-0.393701	-0.6	-3.31492	0.5
September 10th	Cold	Mild	16	3	0	300	Upper	Soft	White limestone	6	18	Thick	12	544	0.85	1	2.5Y 8/1	Light grey	30.3	17.6	12.7	23.9	14.3	1.6	31.3	17.5	13.8	-1	-3.19489	0.1	0.571429	-1.1
September 10th	Cold	Mild	16	3	0	300	Upper	Soft	Fossiliferous sandstone	4	34	Thick	13.9	436	0.76	0	2.5Y 7/4	Light yellow	32.9	21.1	11.8	27.8	16.9	5.1	33.8	17.6	16.2	-0.9	-2.66272	3.5	19.8864	-4.4
September 10th	Cold	Mild	16	3	0	300	Upper	Hard	Purple siltstone	1	6	Thick	13.5	596	0.94	0	7.5R 5/1	Reddish grey	36.6	24.6	12	30.6	20.6	8.6	37.2	24.3	12.9	-0.6	-1.6129	0.3	1.23457	-0.9
September 10th	Cold	Mild	16	3	0	300	Upper	Hard	Quartzite	3	26	Thin	7.9	500	0.97	0	10YR 7/2	Greyish yellow brown	29.7	18.4	11.3	22	13.7	2.4	30.8	19.4	11.4	-1.1	-3.57143	-1	-5.15464	-0.1
September 10th	Cold	Mild	16	3	0	300	Upper	Soft	White limestone	6	17	Intermediate	9.5	444	0.95	0	2.5Y 8/1	Light grey	28.3	17.7	10.6	23.6	12.3	1.7	30.8	17.8	13	-2.5	-8.11688	-0.1	-0.561798	-2.4
September 10th	Cold	Mild	16	3	0	300	Upper	Hard	Grey siltstone	2	8	Intermediate	8.1	592	0.97	0	2.5GY 6/1	Olive grey	32.6	24.3	8.3	28.9	16.6	8.3	34.3	23.5	10.8	-1.7	-4.95627	0.8	3.40426	-2.5
September 10th	Cold	Mild	16	3	0	300	Upper	Soft	Fossiliferous sandstone	4	32	Intermediate	7.9	524	0.92	0	2.5Y 7/4	Light yellow	30.8	22.1	8.7	26.3	14.8	6.1	32	22.7	9.3	-1.2	-3.75	-0.6	-2.64317	-0.6
September 10th	Cold	Mild	16	3	0	300	Lower	Hard	Purple siltstone	1	3	Intermediate	11.6	354	0.91	0	10R 5/1	Reddish grey	29.9	21.7	8.2	26.3	13.9	5.7	28.8	18.8	10	1.1	3.81944	2.9	15.4255	-1.8
September 10th	Cold	Mild	16	3	0	300	Lower	Soft	Orange limestone	5	21	Thick	12.4	608	0.91	0	2.5Y 8/4	Pale yellow	24.2	16.1	8.1	19.3	8.2	0.1	22.3	14.7	7.6	1.9	8.52018	1.4	9.52381	0.5
September 10th	Cold	Mild	16	3	0	300	Lower	Hard	Quartzite	3	25	Thin	9.6	584	0.92	0	10YR 6/2	Greyish yellow brown	30.3	16.5	13.8	23.2	14.3	0.5	30	15.4	14.6	0.3	1	1.1	7.14286	-0.8
September 10th	Cold	Mild	16	3	0	300	Lower	Soft	Fossiliferous sandstone	4	33	Intermediate	8.6	680	0.91	0	2.5Y 6/4	Dull yellow	30.3	17.5	12.8	22.8	14.3	1.5	29.9	15.9	14	0.4	1.33779	1.6	10.0629	-1.2
September 10th	Cold	Mild	16	3	0	300	Lower	Hard	Grey siltstone	2	12	Thin	7.5	576	0.94	0	N 6/0	Grey	35.3	24.3	11	25.3	19.3	8.3	35.7	22.6	13.1	-0.4	-1.12045	1.7	7.52212	-2.1
September 10th	Cold	Mild	16	3	0	300	Lower	Soft	Orange limestone	5	20	Thick	11.7	420	0.97	0	10YR 8/3	Light yellow	23	16.3	6.7	18.9	7	0.3	22.9	15.2	7.7	0.1	0.436681	1.1	7.23684	-1
September 10th	Cold	Mild	16	3	0	300	Lower	Hard	Quartzite	3	29	Thick	14.1	368	0.94	0	10YR 7/2	Greyish yellow brown	25.3	16.3	9	20.3	9.3	0.3	23.7	15.2	8.5	1.6	6.75105	1.1	7.23684	0.5
September 10th	Cold	Mild	16	3	0	300	Lower	Soft	White limestone	6	16	Thick	12.3	412	0.94	0	2.5Y 8/1	Light grey	24.8	15.5	9.3	20.1	8.8	-0.5	23.9	15.2	8.7	0.9	3.76569	0.3	1.97368	0.6
September 10th	Cold	Mild	16	3	0	300	Lower	Hard	Grey siltstone	2	9	Thick	12.6	532	0.97	0	2.5GY 7/1	Light olive grey	31.4	20.7	10.7	24.5	15.4	4.7	30.8	19.9	10.9	0.6	1.94805	0.8	4.0201	-0.2
September 10th	Cold	Mild	16	3	0	300	Lower	Hard	Quartzite	3	30	Thick	14.3	588	0.9	0	10YR 8/1	Light grey	25.2	17	8.2	21.1	9.2	1	25.3	15.9	9.4	-0.1	-0.395257	1.1	6.91824	-1.2
September 10th	Cold	Mild	16	3	0	300	Lower	Hard	Purple siltstone	1	4	Thin	6.4	608	0.95	0	10R 6/1	Reddish grey	31.8	21.3	10.5	24.7	15.8	5.3	31.9	21.2	10.7	-0.1	-0.31348	0.1	0.471698	-0.2
September 10th	Cold	Mild	16	3	0	300	Lower	Soft	Fossiliferous sandstone	4	36	Thin	7.5	742	0.88	1	2.5Y 7/4	Light yellow	30.3	21.3	9	24.4	14.3	5.3	32.1	20.3	11.8	-1.8	-5.60748	1	4.92611	-2.8
September 10th	Cold	Mild	16	3	0	300	Lower	Soft	Fossiliferous sandstone	4	31	Thin	6.9	580	0.94	0	2.5Y 7/6	Yellowish brown	32.7	19.3	13.4	24.5	16.7	3.3	33.9	18.5	15.4	-1.2	-3.53982	0.8	4.32432	-2
September 10th	Cold	Mild	16	3	0	300	Lower	Soft	White limestone	6	15	Thin	5.9	564	0.92	2	2.5Y 8/1	Light grey	30.8	18.8	12	20.8	14.8	2.8	31.5	18.3	13.2	-0.7	-2.22222	0.5	2.73224	-1.2
September 10th	Cold	Mild	16	3	0	300	Lower	Soft	Orange limestone	5	22	Intermediate	7.6	584	0.94	0	2.5Y 7/4	Light yellow	32.9	20.7	12.2	24	16.9	4.7	33.5	20.3	13.2	-0.6	-1.79104	0.4	1.97044	-1
September 10th	Cold	Mild	16	3	0	300	Lower	Hard	Grey siltstone	2	7	Thick	12.3	544	0.95	0	N 7/0	Greyish white	29.9	20.7	9.2	24.5	13.9	4.7	28.4	20.5	7.9	1.5	5.28169	0.2	0.97561	1.3
September 10th	Cold	Mild	16	3	0	300	Lower	Soft	Orange limestone	5	23	Thin	6.1	792	0.94	0	5Y 8/3	Pale yellow	30.4	21.2	9.2	22.8	14.4	5.2	30.9	20.7	10.2	-0.5	-1.61812	0.5	2.41546	-1
September 10th	Cold	Mild	16	3	0	300	Lower	Hard	Purple siltstone	1	2	Thick	14.3	456	0.94	0	7.5YR 5/1	Brownish grey	31.4	22.3	9.1	25	15.4	6.3	31.3	20.6	10.7	0.1	0.319489	1.7	8.25243	-1.6
September 10th	Cold	Mild	16	3	0	300	Lower	Soft	White limestone	6	13	Intermediate	9.4	492	0.91	2	2.5Y 8/1	Light grey	27.7	15.6	12.1	21.3	11.7	-0.4	29.3	15.9	13.4	-1.6	-5.46075	-0.3	-1.88679	-1.3
September 10th	Cold	Mild	16	3	0	300	Lower	Hard	Grey siltstone	2	11	Thin	7.3	696	0.92	0	N 7/0	Greyish white	32.8	21.9	10.9	23.9	16.8	5.9	34.9	21.6	13.3	-2.1	-6.01719	0.3	1.38889	-2.4
September 10th	Cold	Mild	16	3	0	300	Lower	Hard	Purple siltstone	1	1	Intermediate	11.2	408	0.94	0	2.5YR 5/1	Reddish grey	33.8	24	9.8	26.1	17.8	8	35.1	23.4	11.7	-1.3	-3.7037	0.6	2.5641	-1.9
September 10th	Cold	Mild	16	3	0	300	Lower	Hard	Grey siltstone	2	10	Intermediate	8.4	556	0.94	0	2.5GY 7/1	Light olive grey	31.8	22.5	9.3	25.8	15.8	6.5	33.3	22.8	10.5	-1.5	-4.5045	-0.3	-1.31579	-1.2
September 10th	Cold	Mild	16	3	0	300	Lower	Soft	Orange limestone	5	19	Intermediate	6.8	528	0.92	0	2.5Y 6/4	Dull yellow	26.8	20.3	6.5	23.1	10.8	4.3	31.7	20	11.7	-4.9	-15.4574	0.3	1.5	-5.2
September 10th	Cold	Mild	16	3	0	300	Lower	Soft	White limestone	6	14	Thin	6.5	816	0.95	2	2.5Y 8/1	Light grey	29	16.7	12.3	19.3	13	0.7	31.3	17.1	14.2	-2.3	-7.34824	-0.4	-2.33918	-1.9
September 10th	Cold	Mild	16	3	0	300	Lower	Soft	Fossiliferous sandstone	4	35	Thick	15	664	0.91	1	2.5Y 5/6	Yellowish brown	32.8	19.8	13	22.3	16.8	3.8	33.9	18.4	15.5	-1.1	-3.24484	1.4	7.6087	-2.5
September 10th	Cold	Mild	16	3	0	300	Lower	Hard	Purple siltstone	1	5	Thin	6.5	496	0.97	0	10R 6/1	Reddish grey	32.9	24.3	8.6	27.7	16.9	8.3	33.8	25.3	8.5	-0.9	-2.66272	-1	-3.95257	0.1
September 10th	Cold	Mild	16	3	0	300	Lower	Hard	Quartzite	3	28	Intermediate	12.6	464	0.92	0	10YR 8/1	Light grey	25.8	16.4	9.4	20.3	9.8	0.4	23	15.7	7.3	2.8	12.1739	0.7	4.4586	2.1
September 10th	Cold	Mild	16	3	0	300	Lower	Soft	Orange limestone	5	24	Thin	6	588	0.94	1	2.5Y 7/4	Light yellow	31.9	20.6	11.3	24.5	15.9	4.6	31.8	19.7	12.1	0.1	0.314465	0.9	4.56853	-0.8
September 10th	Cold	Mild	16	3	0	300	Lower	Hard	Quartzite	3	27	Intermediate	11.1	448	0.94	0	10YR 8/1	Light grey	25.7	17.6	8.1	22.4	9.7	1.6	24.6	17.3	7.3	1.1	4.47154	0.3	1.7341	0.8
September 10th	Cold	Mild	16	3	0	300	Lower	Soft	White limestone	6	18	Thick	12	504	0.81	0	2.5Y 8/1	Light grey	25.9	16.9	9	20	9.9	0.9	25.9	17.4	8.5	0	0	-0.5	-2.87356	0.5
September 10th	Cold	Mild	16	3	0	300	Lower	Soft	Fossiliferous sandstone	4	34	Thick	13.9	520	0.95	0	2.5Y 7/4	Light yellow	27.9	18.3	9.6	21.8	11.9	2.3	27.6	17.4	10.2	0.3	1.08696	0.9	5.17241	-0.6
September 10th	Cold	Mild	16	3	0	300	Lower	Hard	Purple siltstone	1	6	Thick	13.5	516	1	0	7.5R 5/1	Reddish grey	29.6	21.5	8.1	25.1	13.6	5.5	29	20	9	0.6	2.06897	1.5	7.5	-0.9
September 10th	Cold	Mild	16	3	0	300	Lower	Hard	Quartzite	3	26	Thin	7.9	496	0.94	0	10YR 7/2	Greyish yellow brown	27.4	18.6	8.8	24.5	11.4	2.6	28	19.8	8.2	-0.6	-2.14286	-1.2	-6.06061	0.6
September 10th	Cold	Mild	16	3	0	300	Lower	Soft	White limestone	6	17	Intermediate	9.5	448	0.92	1	2.5Y 8/1	Light grey	27.6	17.2	10.4	22.6	11.6	1.2	25	16.6	8.4	2.6	10.4	0.6	3.61446	2
September 10th	Cold	Mild	16	3	0	300	Lower	Hard	Grey siltstone	2	8	Intermediate	8.1	584	0.97	0	2.5GY 6/1	Olive grey	32.9	23.2	9.7	26.5	16.9	7.2	32.6	21.9	10.7	0.3	0.920245	1.3	5.93607	-1
September 10th	Cold	Mild	16	3	0	300	Lower	Soft	Fossiliferous sandstone	4	32	Intermediate	7.9	536	0.91	0	2.5Y 7/4	Light yellow	31.3	20.7	10.6	24.7	15.3	4.7	27.2	20	7.2	4.1	15.0735	0.7	3.5	3.4
September 18th	Cold	Cloudy	14	4	8	0	Upper	Hard	Purple siltstone	1	3	Intermediate	11.6	424	0.91	0	10R 5/1	Reddish grey	15.3	13.2	2.1	14.8	1.3	-0.8
September 18th	Cold	Cloudy	14	4	8	0	Upper	Soft	Orange limestone	5	21	Thick	12.4	676	0.88	1	2.5Y 8/4	Pale yellow	14.8	12.8	2	14.1	0.8	-1.2
September 18th	Cold	Cloudy	14	4	8	0	Upper	Hard	Quartzite	3	25	Thin	9.6	636	0.87	0	10YR 6/2	Greyish yellow brown	14.6	12.4	2.2	13.7	0.6	-1.6
September 18th	Cold	Cloudy	14	4	8	0	Upper	Soft	Fossiliferous sandstone	4	33	Intermediate	8.6	672	0.85	0	2.5Y 6/4	Dull yellow	14.5	12.3	2.2	13.5	0.5	-1.7
September 18th	Cold	Cloudy	14	4	8	0	Upper	Hard	Grey siltstone	2	12	Thin	7.5	580	0.95	0	N 6/0	Grey	14.8	12.8	2	13.7	0.8	-1.2
September 18th	Cold	Cloudy	14	4	8	0	Upper	Soft	Orange limestone	5	20	Thick	11.7	356	0.92	0	10YR 8/3	Light yellow	14.2	12.1	2.1	13.1	0.2	-1.9
September 18th	Cold	Cloudy	14	4	8	0	Upper	Hard	Quartzite	3	29	Thick	14.1	400	0.94	1	10YR 7/2	Greyish yellow brown	13.3	11.7	1.6	12.8	-0.7	-2.3
September 18th	Cold	Cloudy	14	4	8	0	Upper	Soft	White limestone	6	16	Thick	12.3	460	0.94	1	2.5Y 8/1	Light grey	13.2	11.4	1.8	12.9	-0.8	-2.6
September 18th	Cold	Cloudy	14	4	8	0	Upper	Hard	Grey siltstone	2	9	Thick	12.6	624	0.92	0	2.5GY 7/1	Light olive grey	13.3	11.7	1.6	12.5	-0.7	-2.3
September 18th	Cold	Cloudy	14	4	8	0	Upper	Hard	Quartzite	3	30	Thick	14.3	376	0.96	0	10YR 8/1	Light grey	12.8	11.3	1.5	12.4	-1.2	-2.7
September 18th	Cold	Cloudy	14	4	8	0	Upper	Hard	Purple siltstone	1	4	Thin	6.4	608	0.94	0	10R 6/1	Reddish grey	13.7	12	1.7	12.9	-0.3	-2
September 18th	Cold	Cloudy	14	4	8	0	Upper	Soft	Fossiliferous sandstone	4	36	Thin	7.5	732	0.86	0	2.5Y 7/4	Light yellow	13.7	11.8	1.9	11.9	-0.3	-2.2
September 18th	Cold	Cloudy	14	4	8	0	Upper	Soft	Fossiliferous sandstone	4	31	Thin	6.9	588	0.94	0	2.5Y 7/6	Yellowish brown	13.3	11.8	1.5	12.3	-0.7	-2.2
September 18th	Cold	Cloudy	14	4	8	0	Upper	Soft	White limestone	6	15	Thin	5.9	612	0.82	1	2.5Y 8/1	Light grey	13.3	11.5	1.8	12.2	-0.7	-2.5
September 18th	Cold	Cloudy	14	4	8	0	Upper	Soft	Orange limestone	5	22	Intermediate	7.6	632	0.94	0	2.5Y 7/4	Light yellow	13.1	11.8	1.3	12.3	-0.9	-2.2
September 18th	Cold	Cloudy	14	4	8	0	Upper	Hard	Grey siltstone	2	7	Thick	12.3	436	0.94	0	N 7/0	Greyish white	13.1	11.1	2	12.1	-0.9	-2.9
September 18th	Cold	Cloudy	14	4	8	0	Upper	Soft	Orange limestone	5	23	Thin	6.1	808	0.91	0	5Y 8/3	Pale yellow	12.8	11.3	1.5	12.1	-1.2	-2.7
September 18th	Cold	Cloudy	14	4	8	0	Upper	Hard	Purple siltstone	1	2	Thick	14.3	484	0.97	0	7.5YR 5/1	Brownish grey	13.3	11.3	2	12.2	-0.7	-2.7
September 18th	Cold	Cloudy	14	4	8	0	Upper	Soft	White limestone	6	13	Intermediate	9.4	592	0.91	2	2.5Y 8/1	Light grey	13.3	11.4	1.9	12.1	-0.7	-2.6
September 18th	Cold	Cloudy	14	4	8	0	Upper	Hard	Grey siltstone	2	11	Thin	7.3	688	0.94	0	N 7/0	Greyish white	12.8	11.2	1.6	12.1	-1.2	-2.8
September 18th	Cold	Cloudy	14	4	8	0	Upper	Hard	Purple siltstone	1	1	Intermediate	11.2	384	0.92	0	2.5YR 5/1	Reddish grey	13.1	11.3	1.8	12.1	-0.9	-2.7
September 18th	Cold	Cloudy	14	4	8	0	Upper	Hard	Grey siltstone	2	10	Intermediate	8.4	552	0.94	0	2.5GY 7/1	Light olive grey	12.8	11.1	1.7	12.1	-1.2	-2.9
September 18th	Cold	Cloudy	14	4	8	0	Upper	Soft	Orange limestone	5	19	Intermediate	6.8	604	0.94	0	2.5Y 6/4	Dull yellow	12.8	11.2	1.6	12	-1.2	-2.8
September 18th	Cold	Cloudy	14	4	8	0	Upper	Soft	White limestone	6	14	Thin	6.5	830	0.97	4	2.5Y 8/1	Light grey	12.7	11.1	1.6	12.1	-1.3	-2.9
September 18th	Cold	Cloudy	14	4	8	0	Upper	Soft	Fossiliferous sandstone	4	35	Thick	15	704	0.91	0	2.5Y 5/6	Yellowish brown	12.6	10.5	2.1	11.7	-1.4	-3.5
September 18th	Cold	Cloudy	14	4	8	0	Upper	Hard	Purple siltstone	1	5	Thin	6.5	508	0.92	0	10R 6/1	Reddish grey	12.7	11.3	1.4	12	-1.3	-2.7
September 18th	Cold	Cloudy	14	4	8	0	Upper	Hard	Quartzite	3	28	Intermediate	12.6	328	0.95	0	10YR 8/1	Light grey	12	10.1	1.9	10.8	-2	-3.9
September 18th	Cold	Cloudy	14	4	8	0	Upper	Soft	Orange limestone	5	24	Thin	6	620	0.94	0	2.5Y 7/4	Light yellow	12.7	11.1	1.6	11.5	-1.3	-2.9
September 18th	Cold	Cloudy	14	4	8	0	Upper	Hard	Quartzite	3	27	Intermediate	11.1	444	0.94	0	10YR 8/1	Light grey	12.1	10.1	2	11.1	-1.9	-3.9
September 18th	Cold	Cloudy	14	4	8	0	Upper	Soft	White limestone	6	18	Thick	12	544	0.85	1	2.5Y 8/1	Light grey	12.4	10.6	1.8	11.3	-1.6	-3.4
September 18th	Cold	Cloudy	14	4	8	0	Upper	Soft	Fossiliferous sandstone	4	34	Thick	13.9	436	0.76	0	2.5Y 7/4	Light yellow	12.7	10.8	1.9	12.2	-1.3	-3.2
September 18th	Cold	Cloudy	14	4	8	0	Upper	Hard	Purple siltstone	1	6	Thick	13.5	596	0.94	0	7.5R 5/1	Reddish grey	12.8	11.1	1.7	12.2	-1.2	-2.9
September 18th	Cold	Cloudy	14	4	8	0	Upper	Hard	Quartzite	3	26	Thin	7.9	500	0.97	0	10YR 7/2	Greyish yellow brown	12.8	10.8	2	12.1	-1.2	-3.2
September 18th	Cold	Cloudy	14	4	8	0	Upper	Soft	White limestone	6	17	Intermediate	9.5	444	0.95	0	2.5Y 8/1	Light grey	12.3	10.8	1.5	11.4	-1.7	-3.2
September 18th	Cold	Cloudy	14	4	8	0	Upper	Hard	Grey siltstone	2	8	Intermediate	8.1	592	0.97	0	2.5GY 6/1	Olive grey	13	11.6	1.4	12.2	-1	-2.4
September 18th	Cold	Cloudy	14	4	8	0	Upper	Soft	Fossiliferous sandstone	4	32	Intermediate	7.9	524	0.92	0	2.5Y 7/4	Light yellow	12.9	10.9	2	12	-1.1	-3.1
September 18th	Cold	Cloudy	14	4	8	0	Lower	Hard	Purple siltstone	1	3	Intermediate	11.6	354	0.91	0	10R 5/1	Reddish grey	12.9	11.6	1.3	12.4	-1.1	-2.4
September 18th	Cold	Cloudy	14	4	8	0	Lower	Soft	Orange limestone	5	21	Thick	12.4	608	0.91	0	2.5Y 8/4	Pale yellow	13.1	11.4	1.7	12	-0.9	-2.6
September 18th	Cold	Cloudy	14	4	8	0	Lower	Hard	Quartzite	3	25	Thin	9.6	584	0.92	0	10YR 6/2	Greyish yellow brown	13.5	12.1	1.4	13.1	-0.5	-1.9
September 18th	Cold	Cloudy	14	4	8	0	Lower	Soft	Fossiliferous sandstone	4	33	Intermediate	8.6	680	0.91	0	2.5Y 6/4	Dull yellow	14.3	12.6	1.7	13.1	0.3	-1.4
September 18th	Cold	Cloudy	14	4	8	0	Lower	Hard	Grey siltstone	2	12	Thin	7.5	576	0.94	0	N 6/0	Grey	15.2	13.1	2.1	13.5	1.2	-0.9
September 18th	Cold	Cloudy	14	4	8	0	Lower	Soft	Orange limestone	5	20	Thick	11.7	420	0.97	0	10YR 8/3	Light yellow	14.2	12.6	1.6	13.2	0.2	-1.4
September 18th	Cold	Cloudy	14	4	8	0	Lower	Hard	Quartzite	3	29	Thick	14.1	368	0.94	0	10YR 7/2	Greyish yellow brown	14.3	12.7	1.6	13.5	0.3	-1.3
September 18th	Cold	Cloudy	14	4	8	0	Lower	Soft	White limestone	6	16	Thick	12.3	412	0.94	0	2.5Y 8/1	Light grey	14.5	12.7	1.8	13.3	0.5	-1.3
September 18th	Cold	Cloudy	14	4	8	0	Lower	Hard	Grey siltstone	2	9	Thick	12.6	532	0.97	0	2.5GY 7/1	Light olive grey	14.8	12.7	2.1	13.5	0.8	-1.3
September 18th	Cold	Cloudy	14	4	8	0	Lower	Hard	Quartzite	3	30	Thick	14.3	588	0.9	0	10YR 8/1	Light grey	14.3	12.5	1.8	13.2	0.3	-1.5
September 18th	Cold	Cloudy	14	4	8	0	Lower	Hard	Purple siltstone	1	4	Thin	6.4	608	0.95	0	10R 6/1	Reddish grey	15	13.3	1.7	13.9	1	-0.7
September 18th	Cold	Cloudy	14	4	8	0	Lower	Soft	Fossiliferous sandstone	4	36	Thin	7.5	742	0.88	1	2.5Y 7/4	Light yellow	14.6	12.8	1.8	13.6	0.6	-1.2
September 18th	Cold	Cloudy	14	4	8	0	Lower	Soft	Fossiliferous sandstone	4	31	Thin	6.9	580	0.94	0	2.5Y 7/6	Yellowish brown	14.3	12.7	1.6	13.3	0.3	-1.3
September 18th	Cold	Cloudy	14	4	8	0	Lower	Soft	White limestone	6	15	Thin	5.9	564	0.92	2	2.5Y 8/1	Light grey	14.4	12.9	1.5	13.6	0.4	-1.1
September 18th	Cold	Cloudy	14	4	8	0	Lower	Soft	Orange limestone	5	22	Intermediate	7.6	584	0.94	0	2.5Y 7/4	Light yellow	14.9	12.6	2.3	13.3	0.9	-1.4
September 18th	Cold	Cloudy	14	4	8	0	Lower	Hard	Grey siltstone	2	7	Thick	12.3	544	0.95	0	N 7/0	Greyish white	14.5	12.6	1.9	13.3	0.5	-1.4
September 18th	Cold	Cloudy	14	4	8	0	Lower	Soft	Orange limestone	5	23	Thin	6.1	792	0.94	0	5Y 8/3	Pale yellow	14	12.7	1.3	13.4	0	-1.3
September 18th	Cold	Cloudy	14	4	8	0	Lower	Hard	Purple siltstone	1	2	Thick	14.3	456	0.94	0	7.5YR 5/1	Brownish grey	14.5	12.6	1.9	13.6	0.5	-1.4
September 18th	Cold	Cloudy	14	4	8	0	Lower	Soft	White limestone	6	13	Intermediate	9.4	492	0.91	2	2.5Y 8/1	Light grey	14.1	12.5	1.6	13.2	0.1	-1.5
September 18th	Cold	Cloudy	14	4	8	0	Lower	Hard	Grey siltstone	2	11	Thin	7.3	696	0.92	0	N 7/0	Greyish white	14.8	12.9	1.9	13.6	0.8	-1.1
September 18th	Cold	Cloudy	14	4	8	0	Lower	Hard	Purple siltstone	1	1	Intermediate	11.2	408	0.94	0	2.5YR 5/1	Reddish grey	14.6	13	1.6	13.9	0.6	-1
September 18th	Cold	Cloudy	14	4	8	0	Lower	Hard	Grey siltstone	2	10	Intermediate	8.4	556	0.94	0	2.5GY 7/1	Light olive grey	14.9	13	1.9	13.5	0.9	-1
September 18th	Cold	Cloudy	14	4	8	0	Lower	Soft	Orange limestone	5	19	Intermediate	6.8	528	0.92	0	2.5Y 6/4	Dull yellow	14.8	12.8	2	13.8	0.8	-1.2
September 18th	Cold	Cloudy	14	4	8	0	Lower	Soft	White limestone	6	14	Thin	6.5	816	0.95	2	2.5Y 8/1	Light grey	14.8	13	1.8	13.8	0.8	-1
September 18th	Cold	Cloudy	14	4	8	0	Lower	Soft	Fossiliferous sandstone	4	35	Thick	15	664	0.91	1	2.5Y 5/6	Yellowish brown	14.5	12.8	1.7	13.5	0.5	-1.2
September 18th	Cold	Cloudy	14	4	8	0	Lower	Hard	Purple siltstone	1	5	Thin	6.5	496	0.97	0	10R 6/1	Reddish grey	15.8	13.7	2.1	14.5	1.8	-0.3
September 18th	Cold	Cloudy	14	4	8	0	Lower	Hard	Quartzite	3	28	Intermediate	12.6	464	0.92	0	10YR 8/1	Light grey	14.9	12.5	2.4	13.3	0.9	-1.5
September 18th	Cold	Cloudy	14	4	8	0	Lower	Soft	Orange limestone	5	24	Thin	6	588	0.94	1	2.5Y 7/4	Light yellow	14.5	13	1.5	13.6	0.5	-1
September 18th	Cold	Cloudy	14	4	8	0	Lower	Hard	Quartzite	3	27	Intermediate	11.1	448	0.94	0	10YR 8/1	Light grey	14.1	12.7	1.4	13.4	0.1	-1.3
September 18th	Cold	Cloudy	14	4	8	0	Lower	Soft	White limestone	6	18	Thick	12	504	0.81	0	2.5Y 8/1	Light grey	13.8	12.4	1.4	12.8	-0.2	-1.6
September 18th	Cold	Cloudy	14	4	8	0	Lower	Soft	Fossiliferous sandstone	4	34	Thick	13.9	520	0.95	0	2.5Y 7/4	Light yellow	14.7	12.7	2	13.3	0.7	-1.3
September 18th	Cold	Cloudy	14	4	8	0	Lower	Hard	Purple siltstone	1	6	Thick	13.5	516	1	0	7.5R 5/1	Reddish grey	15	13.3	1.7	13.9	1	-0.7
September 18th	Cold	Cloudy	14	4	8	0	Lower	Hard	Quartzite	3	26	Thin	7.9	496	0.94	0	10YR 7/2	Greyish yellow brown	15	13.5	1.5	14.1	1	-0.5
September 18th	Cold	Cloudy	14	4	8	0	Lower	Soft	White limestone	6	17	Intermediate	9.5	448	0.92	1	2.5Y 8/1	Light grey	14.7	12.8	1.9	13.4	0.7	-1.2
September 18th	Cold	Cloudy	14	4	8	0	Lower	Hard	Grey siltstone	2	8	Intermediate	8.1	584	0.97	0	2.5GY 6/1	Olive grey	15.2	13.7	1.5	14.4	1.2	-0.3
September 18th	Cold	Cloudy	14	4	8	0	Lower	Soft	Fossiliferous sandstone	4	32	Intermediate	7.9	536	0.91	0	2.5Y 7/4	Light yellow	14.4	12.9	1.5	13.7	0.4	-1.1
September 18th	Cold	Cloudy	15	4	8	60	Upper	Hard	Purple siltstone	1	3	Intermediate	11.6	424	0.91	0	10R 5/1	Reddish grey	17.8	15.7	2.1	17	2.8	0.7	15.3	13.2	2.1	2.5	16.3399	2.5	18.9394	0
September 18th	Cold	Cloudy	15	4	8	60	Upper	Soft	Orange limestone	5	21	Thick	12.4	676	0.88	1	2.5Y 8/4	Pale yellow	15.5	13.8	1.7	15.1	0.5	-1.2	14.8	12.8	2	0.7	4.72973	1	7.8125	-0.3
September 18th	Cold	Cloudy	15	4	8	60	Upper	Hard	Quartzite	3	25	Thin	9.6	636	0.87	0	10YR 6/2	Greyish yellow brown	16	13.9	2.1	14.6	1	-1.1	14.6	12.4	2.2	1.4	9.58904	1.5	12.0968	-0.1
September 18th	Cold	Cloudy	15	4	8	60	Upper	Soft	Fossiliferous sandstone	4	33	Intermediate	8.6	672	0.85	0	2.5Y 6/4	Dull yellow	15.9	13.7	2.2	15.2	0.9	-1.3	14.5	12.3	2.2	1.4	9.65517	1.4	11.3821	0
September 18th	Cold	Cloudy	15	4	8	60	Upper	Hard	Grey siltstone	2	12	Thin	7.5	580	0.95	0	N 6/0	Grey	17.2	15.4	1.8	16.2	2.2	0.4	14.8	12.8	2	2.4	16.2162	2.6	20.3125	-0.2
September 18th	Cold	Cloudy	15	4	8	60	Upper	Soft	Orange limestone	5	20	Thick	11.7	356	0.92	0	10YR 8/3	Light yellow	15.5	12.9	2.6	14.5	0.5	-2.1	14.2	12.1	2.1	1.3	9.15493	0.8	6.61157	0.5
September 18th	Cold	Cloudy	15	4	8	60	Upper	Hard	Quartzite	3	29	Thick	14.1	400	0.94	1	10YR 7/2	Greyish yellow brown	14.4	12.6	1.8	13.3	-0.6	-2.4	13.3	11.7	1.6	1.1	8.27068	0.9	7.69231	0.2
September 18th	Cold	Cloudy	15	4	8	60	Upper	Soft	White limestone	6	16	Thick	12.3	460	0.94	1	2.5Y 8/1	Light grey	14.2	12.4	1.8	13.5	-0.8	-2.6	13.2	11.4	1.8	1	7.57576	1	8.77193	0
September 18th	Cold	Cloudy	15	4	8	60	Upper	Hard	Grey siltstone	2	9	Thick	12.6	624	0.92	0	2.5GY 7/1	Light olive grey	15.8	14	1.8	14.9	0.8	-1	13.3	11.7	1.6	2.5	18.797	2.3	19.6581	0.2
September 18th	Cold	Cloudy	15	4	8	60	Upper	Hard	Quartzite	3	30	Thick	14.3	376	0.96	0	10YR 8/1	Light grey	13.9	11.6	2.3	12.6	-1.1	-3.4	12.8	11.3	1.5	1.1	8.59375	0.3	2.65487	0.8
September 18th	Cold	Cloudy	15	4	8	60	Upper	Hard	Purple siltstone	1	4	Thin	6.4	608	0.94	0	10R 6/1	Reddish grey	15.7	13.9	1.8	14.7	0.7	-1.1	13.7	12	1.7	2	14.5985	1.9	15.8333	0.1
September 18th	Cold	Cloudy	15	4	8	60	Upper	Soft	Fossiliferous sandstone	4	36	Thin	7.5	732	0.86	0	2.5Y 7/4	Light yellow	15.7	13.4	2.3	13.9	0.7	-1.6	13.7	11.8	1.9	2	14.5985	1.6	13.5593	0.4
September 18th	Cold	Cloudy	15	4	8	60	Upper	Soft	Fossiliferous sandstone	4	31	Thin	6.9	588	0.94	0	2.5Y 7/6	Yellowish brown	15.3	13.6	1.7	14.4	0.3	-1.4	13.3	11.8	1.5	2	15.0376	1.8	15.2542	0.2
September 18th	Cold	Cloudy	15	4	8	60	Upper	Soft	White limestone	6	15	Thin	5.9	612	0.82	1	2.5Y 8/1	Light grey	14.4	12.8	1.6	13.8	-0.6	-2.2	13.3	11.5	1.8	1.1	8.27068	1.3	11.3043	-0.2
September 18th	Cold	Cloudy	15	4	8	60	Upper	Soft	Orange limestone	5	22	Intermediate	7.6	632	0.94	0	2.5Y 7/4	Light yellow	15.3	13.9	1.4	14.3	0.3	-1.1	13.1	11.8	1.3	2.2	16.7939	2.1	17.7966	0.1
September 18th	Cold	Cloudy	15	4	8	60	Upper	Hard	Grey siltstone	2	7	Thick	12.3	436	0.94	0	N 7/0	Greyish white	15.8	13.6	2.2	14.7	0.8	-1.4	13.1	11.1	2	2.7	20.6107	2.5	22.5225	0.2
September 18th	Cold	Cloudy	15	4	8	60	Upper	Soft	Orange limestone	5	23	Thin	6.1	808	0.91	0	5Y 8/3	Pale yellow	14.6	13	1.6	13.8	-0.4	-2	12.8	11.3	1.5	1.8	14.0625	1.7	15.0442	0.1
September 18th	Cold	Cloudy	15	4	8	60	Upper	Hard	Purple siltstone	1	2	Thick	14.3	484	0.97	0	7.5YR 5/1	Brownish grey	16.1	14.5	1.6	14.9	1.1	-0.5	13.3	11.3	2	2.8	21.0526	3.2	28.3186	-0.4
September 18th	Cold	Cloudy	15	4	8	60	Upper	Soft	White limestone	6	13	Intermediate	9.4	592	0.91	2	2.5Y 8/1	Light grey	14.4	12	2.4	13.3	-0.6	-3	13.3	11.4	1.9	1.1	8.27068	0.6	5.26316	0.5
September 18th	Cold	Cloudy	15	4	8	60	Upper	Hard	Grey siltstone	2	11	Thin	7.3	688	0.94	0	N 7/0	Greyish white	16.3	14.1	2.2	15.3	1.3	-0.9	12.8	11.2	1.6	3.5	27.3438	2.9	25.8929	0.6
September 18th	Cold	Cloudy	15	4	8	60	Upper	Hard	Purple siltstone	1	1	Intermediate	11.2	384	0.92	0	2.5YR 5/1	Reddish grey	16.5	13.9	2.6	15.7	1.5	-1.1	13.1	11.3	1.8	3.4	25.9542	2.6	23.0088	0.8
September 18th	Cold	Cloudy	15	4	8	60	Upper	Hard	Grey siltstone	2	10	Intermediate	8.4	552	0.94	0	2.5GY 7/1	Light olive grey	15.7	13.2	2.5	15	0.7	-1.8	12.8	11.1	1.7	2.9	22.6562	2.1	18.9189	0.8
September 18th	Cold	Cloudy	15	4	8	60	Upper	Soft	Orange limestone	5	19	Intermediate	6.8	604	0.94	0	2.5Y 6/4	Dull yellow	15.1	13.1	2	14.4	0.1	-1.9	12.8	11.2	1.6	2.3	17.9687	1.9	16.9643	0.4
September 18th	Cold	Cloudy	15	4	8	60	Upper	Soft	White limestone	6	14	Thin	6.5	830	0.97	4	2.5Y 8/1	Light grey	14.8	12.5	2.3	13.8	-0.2	-2.5	12.7	11.1	1.6	2.1	16.5354	1.4	12.6126	0.7
September 18th	Cold	Cloudy	15	4	8	60	Upper	Soft	Fossiliferous sandstone	4	35	Thick	15	704	0.91	0	2.5Y 5/6	Yellowish brown	15.3	13.2	2.1	14.1	0.3	-1.8	12.6	10.5	2.1	2.7	21.4286	2.7	25.7143	0
September 18th	Cold	Cloudy	15	4	8	60	Upper	Hard	Purple siltstone	1	5	Thin	6.5	508	0.92	0	10R 6/1	Reddish grey	16.1	13.6	2.5	15.5	1.1	-1.4	12.7	11.3	1.4	3.4	26.7717	2.3	20.354	1.1
September 18th	Cold	Cloudy	15	4	8	60	Upper	Hard	Quartzite	3	28	Intermediate	12.6	328	0.95	0	10YR 8/1	Light grey	13.8	11.3	2.5	12	-1.2	-3.7	12	10.1	1.9	1.8	15	1.2	11.8812	0.6
September 18th	Cold	Cloudy	15	4	8	60	Upper	Soft	Orange limestone	5	24	Thin	6	620	0.94	0	2.5Y 7/4	Light yellow	14.5	12.7	1.8	13.2	-0.5	-2.3	12.7	11.1	1.6	1.8	14.1732	1.6	14.4144	0.2
September 18th	Cold	Cloudy	15	4	8	60	Upper	Hard	Quartzite	3	27	Intermediate	11.1	444	0.94	0	10YR 8/1	Light grey	13.3	10.9	2.4	12.4	-1.7	-4.1	12.1	10.1	2	1.2	9.91736	0.8	7.92079	0.4
September 18th	Cold	Cloudy	15	4	8	60	Upper	Soft	White limestone	6	18	Thick	12	544	0.85	1	2.5Y 8/1	Light grey	14.4	12.4	2	13.4	-0.6	-2.6	12.4	10.6	1.8	2	16.129	1.8	16.9811	0.2
September 18th	Cold	Cloudy	15	4	8	60	Upper	Soft	Fossiliferous sandstone	4	34	Thick	13.9	436	0.76	0	2.5Y 7/4	Light yellow	15.5	13.2	2.3	14.9	0.5	-1.8	12.7	10.8	1.9	2.8	22.0472	2.4	22.2222	0.4
September 18th	Cold	Cloudy	15	4	8	60	Upper	Hard	Purple siltstone	1	6	Thick	13.5	596	0.94	0	7.5R 5/1	Reddish grey	16.8	14.4	2.4	16.3	1.8	-0.6	12.8	11.1	1.7	4	31.25	3.3	29.7297	0.7
September 18th	Cold	Cloudy	15	4	8	60	Upper	Hard	Quartzite	3	26	Thin	7.9	500	0.97	0	10YR 7/2	Greyish yellow brown	14.2	12.3	1.9	12.9	-0.8	-2.7	12.8	10.8	2	1.4	10.9375	1.5	13.8889	-0.1
September 18th	Cold	Cloudy	15	4	8	60	Upper	Soft	White limestone	6	17	Intermediate	9.5	444	0.95	0	2.5Y 8/1	Light grey	13.5	11.9	1.6	12.8	-1.5	-3.1	12.3	10.8	1.5	1.2	9.7561	1.1	10.1852	0.1
September 18th	Cold	Cloudy	15	4	8	60	Upper	Hard	Grey siltstone	2	8	Intermediate	8.1	592	0.97	0	2.5GY 6/1	Olive grey	15.7	13.5	2.2	15	0.7	-1.5	13	11.6	1.4	2.7	20.7692	1.9	16.3793	0.8
September 18th	Cold	Cloudy	15	4	8	60	Upper	Soft	Fossiliferous sandstone	4	32	Intermediate	7.9	524	0.92	0	2.5Y 7/4	Light yellow	15	13	2	13.8	0	-2	12.9	10.9	2	2.1	16.2791	2.1	19.2661	0
September 18th	Cold	Cloudy	15	4	8	60	Lower	Hard	Purple siltstone	1	3	Intermediate	11.6	354	0.91	0	10R 5/1	Reddish grey	15.7	13.4	2.3	14.1	0.7	-1.6	12.9	11.6	1.3	2.8	21.7054	1.8	15.5172	1
September 18th	Cold	Cloudy	15	4	8	60	Lower	Soft	Orange limestone	5	21	Thick	12.4	608	0.91	0	2.5Y 8/4	Pale yellow	14.5	12.1	2.4	12.8	-0.5	-2.9	13.1	11.4	1.7	1.4	10.687	0.7	6.14035	0.7
September 18th	Cold	Cloudy	15	4	8	60	Lower	Hard	Quartzite	3	25	Thin	9.6	584	0.92	0	10YR 6/2	Greyish yellow brown	16.1	13.3	2.8	14.7	1.1	-1.7	13.5	12.1	1.4	2.6	19.2593	1.2	9.91736	1.4
September 18th	Cold	Cloudy	15	4	8	60	Lower	Soft	Fossiliferous sandstone	4	33	Intermediate	8.6	680	0.91	0	2.5Y 6/4	Dull yellow	15.8	13.6	2.2	14.3	0.8	-1.4	14.3	12.6	1.7	1.5	10.4895	1	7.93651	0.5
September 18th	Cold	Cloudy	15	4	8	60	Lower	Hard	Grey siltstone	2	12	Thin	7.5	576	0.94	0	N 6/0	Grey	18.4	14.9	3.5	15.3	3.4	-0.1	15.2	13.1	2.1	3.2	21.0526	1.8	13.7405	1.4
September 18th	Cold	Cloudy	15	4	8	60	Lower	Soft	Orange limestone	5	20	Thick	11.7	420	0.97	0	10YR 8/3	Light yellow	14.5	12.4	2.1	13.2	-0.5	-2.6	14.2	12.6	1.6	0.3	2.11268	-0.2	-1.5873	0.5
September 18th	Cold	Cloudy	15	4	8	60	Lower	Hard	Quartzite	3	29	Thick	14.1	368	0.94	0	10YR 7/2	Greyish yellow brown	15.1	13.1	2	14	0.1	-1.9	14.3	12.7	1.6	0.8	5.59441	0.4	3.14961	0.4
September 18th	Cold	Cloudy	15	4	8	60	Lower	Soft	White limestone	6	16	Thick	12.3	412	0.94	0	2.5Y 8/1	Light grey	15	12.9	2.1	13.6	0	-2.1	14.5	12.7	1.8	0.5	3.44828	0.2	1.5748	0.3
September 18th	Cold	Cloudy	15	4	8	60	Lower	Hard	Grey siltstone	2	9	Thick	12.6	532	0.97	0	2.5GY 7/1	Light olive grey	16.6	14	2.6	14.9	1.6	-1	14.8	12.7	2.1	1.8	12.1622	1.3	10.2362	0.5
September 18th	Cold	Cloudy	15	4	8	60	Lower	Hard	Quartzite	3	30	Thick	14.3	588	0.9	0	10YR 8/1	Light grey	15.2	13.1	2.1	14	0.2	-1.9	14.3	12.5	1.8	0.9	6.29371	0.6	4.8	0.3
September 18th	Cold	Cloudy	15	4	8	60	Lower	Hard	Purple siltstone	1	4	Thin	6.4	608	0.95	0	10R 6/1	Reddish grey	17.4	15.2	2.2	15.8	2.4	0.2	15	13.3	1.7	2.4	16	1.9	14.2857	0.5
September 18th	Cold	Cloudy	15	4	8	60	Lower	Soft	Fossiliferous sandstone	4	36	Thin	7.5	742	0.88	1	2.5Y 7/4	Light yellow	16.8	14.4	2.4	15.2	1.8	-0.6	14.6	12.8	1.8	2.2	15.0685	1.6	12.5	0.6
September 18th	Cold	Cloudy	15	4	8	60	Lower	Soft	Fossiliferous sandstone	4	31	Thin	6.9	580	0.94	0	2.5Y 7/6	Yellowish brown	15.7	13.9	1.8	14.6	0.7	-1.1	14.3	12.7	1.6	1.4	9.79021	1.2	9.44882	0.2
September 18th	Cold	Cloudy	15	4	8	60	Lower	Soft	White limestone	6	15	Thin	5.9	564	0.92	2	2.5Y 8/1	Light grey	16	14.3	1.7	15.2	1	-0.7	14.4	12.9	1.5	1.6	11.1111	1.4	10.8527	0.2
September 18th	Cold	Cloudy	15	4	8	60	Lower	Soft	Orange limestone	5	22	Intermediate	7.6	584	0.94	0	2.5Y 7/4	Light yellow	16.6	13.7	2.9	14.8	1.6	-1.3	14.9	12.6	2.3	1.7	11.4094	1.1	8.73016	0.6
September 18th	Cold	Cloudy	15	4	8	60	Lower	Hard	Grey siltstone	2	7	Thick	12.3	544	0.95	0	N 7/0	Greyish white	16.1	14.5	1.6	15.2	1.1	-0.5	14.5	12.6	1.9	1.6	11.0345	1.9	15.0794	-0.3
September 18th	Cold	Cloudy	15	4	8	60	Lower	Soft	Orange limestone	5	23	Thin	6.1	792	0.94	0	5Y 8/3	Pale yellow	16.1	13.8	2.3	14.3	1.1	-1.2	14	12.7	1.3	2.1	15	1.1	8.66142	1
September 18th	Cold	Cloudy	15	4	8	60	Lower	Hard	Purple siltstone	1	2	Thick	14.3	456	0.94	0	7.5YR 5/1	Brownish grey	16.2	14.1	2.1	15.3	1.2	-0.9	14.5	12.6	1.9	1.7	11.7241	1.5	11.9048	0.2
September 18th	Cold	Cloudy	15	4	8	60	Lower	Soft	White limestone	6	13	Intermediate	9.4	492	0.91	2	2.5Y 8/1	Light grey	15.3	13.1	2.2	14.6	0.3	-1.9	14.1	12.5	1.6	1.2	8.51064	0.6	4.8	0.6
September 18th	Cold	Cloudy	15	4	8	60	Lower	Hard	Grey siltstone	2	11	Thin	7.3	696	0.92	0	N 7/0	Greyish white	17.5	14.8	2.7	15.4	2.5	-0.2	14.8	12.9	1.9	2.7	18.2432	1.9	14.7287	0.8
September 18th	Cold	Cloudy	15	4	8	60	Lower	Hard	Purple siltstone	1	1	Intermediate	11.2	408	0.94	0	2.5YR 5/1	Reddish grey	17.8	15.5	2.3	16.1	2.8	0.5	14.6	13	1.6	3.2	21.9178	2.5	19.2308	0.7
September 18th	Cold	Cloudy	15	4	8	60	Lower	Hard	Grey siltstone	2	10	Intermediate	8.4	556	0.94	0	2.5GY 7/1	Light olive grey	17.3	15.3	2	15.8	2.3	0.3	14.9	13	1.9	2.4	16.1074	2.3	17.6923	0.1
September 18th	Cold	Cloudy	15	4	8	60	Lower	Soft	Orange limestone	5	19	Intermediate	6.8	528	0.92	0	2.5Y 6/4	Dull yellow	16.4	14.3	2.1	14.7	1.4	-0.7	14.8	12.8	2	1.6	10.8108	1.5	11.7188	0.1
September 18th	Cold	Cloudy	15	4	8	60	Lower	Soft	White limestone	6	14	Thin	6.5	816	0.95	2	2.5Y 8/1	Light grey	15.8	13.6	2.2	14	0.8	-1.4	14.8	13	1.8	1	6.75676	0.6	4.61538	0.4
September 18th	Cold	Cloudy	15	4	8	60	Lower	Soft	Fossiliferous sandstone	4	35	Thick	15	664	0.91	1	2.5Y 5/6	Yellowish brown	15.8	13.7	2.1	14.3	0.8	-1.3	14.5	12.8	1.7	1.3	8.96552	0.9	7.03125	0.4
September 18th	Cold	Cloudy	15	4	8	60	Lower	Hard	Purple siltstone	1	5	Thin	6.5	496	0.97	0	10R 6/1	Reddish grey	18.4	16.3	2.1	16.8	3.4	1.3	15.8	13.7	2.1	2.6	16.4557	2.6	18.9781	-3.55271e-15
September 18th	Cold	Cloudy	15	4	8	60	Lower	Hard	Quartzite	3	28	Intermediate	12.6	464	0.92	0	10YR 8/1	Light grey	16.2	14.1	2.1	14.7	1.2	-0.9	14.9	12.5	2.4	1.3	8.72483	1.6	12.8	-0.3
September 18th	Cold	Cloudy	15	4	8	60	Lower	Soft	Orange limestone	5	24	Thin	6	588	0.94	1	2.5Y 7/4	Light yellow	16.2	14.1	2.1	14.7	1.2	-0.9	14.5	13	1.5	1.7	11.7241	1.1	8.46154	0.6
September 18th	Cold	Cloudy	15	4	8	60	Lower	Hard	Quartzite	3	27	Intermediate	11.1	448	0.94	0	10YR 8/1	Light grey	15.8	13.9	1.9	14.8	0.8	-1.1	14.1	12.7	1.4	1.7	12.0567	1.2	9.44882	0.5
September 18th	Cold	Cloudy	15	4	8	60	Lower	Soft	White limestone	6	18	Thick	12	504	0.81	0	2.5Y 8/1	Light grey	14.8	13	1.8	13.6	-0.2	-2	13.8	12.4	1.4	1	7.24638	0.6	4.83871	0.4
September 18th	Cold	Cloudy	15	4	8	60	Lower	Soft	Fossiliferous sandstone	4	34	Thick	13.9	520	0.95	0	2.5Y 7/4	Light yellow	16	13.8	2.2	14.6	1	-1.2	14.7	12.7	2	1.3	8.84354	1.1	8.66142	0.2
September 18th	Cold	Cloudy	15	4	8	60	Lower	Hard	Purple siltstone	1	6	Thick	13.5	516	1	0	7.5R 5/1	Reddish grey	17.3	14.9	2.4	16	2.3	-0.1	15	13.3	1.7	2.3	15.3333	1.6	12.0301	0.7
September 18th	Cold	Cloudy	15	4	8	60	Lower	Hard	Quartzite	3	26	Thin	7.9	496	0.94	0	10YR 7/2	Greyish yellow brown	17	15.5	1.5	16.5	2	0.5	15	13.5	1.5	2	13.3333	2	14.8148	0
September 18th	Cold	Cloudy	15	4	8	60	Lower	Soft	White limestone	6	17	Intermediate	9.5	448	0.92	1	2.5Y 8/1	Light grey	15.8	13.7	2.1	14.8	0.8	-1.3	14.7	12.8	1.9	1.1	7.48299	0.9	7.03125	0.2
September 18th	Cold	Cloudy	15	4	8	60	Lower	Hard	Grey siltstone	2	8	Intermediate	8.1	584	0.97	0	2.5GY 6/1	Olive grey	17.9	15.8	2.1	16.9	2.9	0.8	15.2	13.7	1.5	2.7	17.7632	2.1	15.3285	0.6
September 18th	Cold	Cloudy	15	4	8	60	Lower	Soft	Fossiliferous sandstone	4	32	Intermediate	7.9	536	0.91	0	2.5Y 7/4	Light yellow	16.3	14.6	1.7	15.8	1.3	-0.4	14.4	12.9	1.5	1.9	13.1944	1.7	13.1783	0.2
September 18th	Cold	Cloudy	17	4	8	120	Upper	Hard	Purple siltstone	1	3	Intermediate	11.6	424	0.91	0	10R 5/1	Reddish grey	21.1	18.5	2.6	20.4	4.1	1.5	17.8	15.7	2.1	3.3	18.5393	2.8	17.8344	0.5
September 18th	Cold	Cloudy	17	4	8	120	Upper	Soft	Orange limestone	5	21	Thick	12.4	676	0.88	1	2.5Y 8/4	Pale yellow	18.1	15.1	3	16.8	1.1	-1.9	15.5	13.8	1.7	2.6	16.7742	1.3	9.42029	1.3
September 18th	Cold	Cloudy	17	4	8	120	Upper	Hard	Quartzite	3	25	Thin	9.6	636	0.87	0	10YR 6/2	Greyish yellow brown	18.7	16.3	2.4	17.2	1.7	-0.7	16	13.9	2.1	2.7	16.875	2.4	17.2662	0.3
September 18th	Cold	Cloudy	17	4	8	120	Upper	Soft	Fossiliferous sandstone	4	33	Intermediate	8.6	672	0.85	0	2.5Y 6/4	Dull yellow	18.1	15.6	2.5	17.8	1.1	-1.4	15.9	13.7	2.2	2.2	13.8365	1.9	13.8686	0.3
September 18th	Cold	Cloudy	17	4	8	120	Upper	Hard	Grey siltstone	2	12	Thin	7.5	580	0.95	0	N 6/0	Grey	21.1	18.2	2.9	19.8	4.1	1.2	17.2	15.4	1.8	3.9	22.6744	2.8	18.1818	1.1
September 18th	Cold	Cloudy	17	4	8	120	Upper	Soft	Orange limestone	5	20	Thick	11.7	356	0.92	0	10YR 8/3	Light yellow	17.8	15.3	2.5	16.5	0.8	-1.7	15.5	12.9	2.6	2.3	14.8387	2.4	18.6047	-0.1
September 18th	Cold	Cloudy	17	4	8	120	Upper	Hard	Quartzite	3	29	Thick	14.1	400	0.94	1	10YR 7/2	Greyish yellow brown	16.5	14.4	2.1	16.3	-0.5	-2.6	14.4	12.6	1.8	2.1	14.5833	1.8	14.2857	0.3
September 18th	Cold	Cloudy	17	4	8	120	Upper	Soft	White limestone	6	16	Thick	12.3	460	0.94	1	2.5Y 8/1	Light grey	16	13.7	2.3	15	-1	-3.3	14.2	12.4	1.8	1.8	12.6761	1.3	10.4839	0.5
September 18th	Cold	Cloudy	17	4	8	120	Upper	Hard	Grey siltstone	2	9	Thick	12.6	624	0.92	0	2.5GY 7/1	Light olive grey	19.1	16.6	2.5	18	2.1	-0.4	15.8	14	1.8	3.3	20.8861	2.6	18.5714	0.7
September 18th	Cold	Cloudy	17	4	8	120	Upper	Hard	Quartzite	3	30	Thick	14.3	376	0.96	0	10YR 8/1	Light grey	16	13.1	2.9	14.7	-1	-3.9	13.9	11.6	2.3	2.1	15.1079	1.5	12.931	0.6
September 18th	Cold	Cloudy	17	4	8	120	Upper	Hard	Purple siltstone	1	4	Thin	6.4	608	0.94	0	10R 6/1	Reddish grey	18.3	16.5	1.8	17.3	1.3	-0.5	15.7	13.9	1.8	2.6	16.5605	2.6	18.705	1.77636e-15
September 18th	Cold	Cloudy	17	4	8	120	Upper	Soft	Fossiliferous sandstone	4	36	Thin	7.5	732	0.86	0	2.5Y 7/4	Light yellow	18	15	3	15.8	1	-2	15.7	13.4	2.3	2.3	14.6497	1.6	11.9403	0.7
September 18th	Cold	Cloudy	17	4	8	120	Upper	Soft	Fossiliferous sandstone	4	31	Thin	6.9	588	0.94	0	2.5Y 7/6	Yellowish brown	17.7	15.5	2.2	16.9	0.7	-1.5	15.3	13.6	1.7	2.4	15.6863	1.9	13.9706	0.5
September 18th	Cold	Cloudy	17	4	8	120	Upper	Soft	White limestone	6	15	Thin	5.9	612	0.82	1	2.5Y 8/1	Light grey	16.8	13.8	3	15.3	-0.2	-3.2	14.4	12.8	1.6	2.4	16.6667	1	7.8125	1.4
September 18th	Cold	Cloudy	17	4	8	120	Upper	Soft	Orange limestone	5	22	Intermediate	7.6	632	0.94	0	2.5Y 7/4	Light yellow	17.6	15.7	1.9	16.9	0.6	-1.3	15.3	13.9	1.4	2.3	15.0327	1.8	12.9496	0.5
September 18th	Cold	Cloudy	17	4	8	120	Upper	Hard	Grey siltstone	2	7	Thick	12.3	436	0.94	0	N 7/0	Greyish white	18.7	16.2	2.5	17.6	1.7	-0.8	15.8	13.6	2.2	2.9	18.3544	2.6	19.1176	0.3
September 18th	Cold	Cloudy	17	4	8	120	Upper	Soft	Orange limestone	5	23	Thin	6.1	808	0.91	0	5Y 8/3	Pale yellow	16.6	14.8	1.8	15.8	-0.4	-2.2	14.6	13	1.6	2	13.6986	1.8	13.8462	0.2
September 18th	Cold	Cloudy	17	4	8	120	Upper	Hard	Purple siltstone	1	2	Thick	14.3	484	0.97	0	7.5YR 5/1	Brownish grey	19.4	17.4	2	18.1	2.4	0.4	16.1	14.5	1.6	3.3	20.4969	2.9	20	0.4
September 18th	Cold	Cloudy	17	4	8	120	Upper	Soft	White limestone	6	13	Intermediate	9.4	592	0.91	2	2.5Y 8/1	Light grey	16.1	13.8	2.3	14.8	-0.9	-3.2	14.4	12	2.4	1.7	11.8056	1.8	15	-0.1
September 18th	Cold	Cloudy	17	4	8	120	Upper	Hard	Grey siltstone	2	11	Thin	7.3	688	0.94	0	N 7/0	Greyish white	19.5	16.6	2.9	18.7	2.5	-0.4	16.3	14.1	2.2	3.2	19.6319	2.5	17.7305	0.7
September 18th	Cold	Cloudy	17	4	8	120	Upper	Hard	Purple siltstone	1	1	Intermediate	11.2	384	0.92	0	2.5YR 5/1	Reddish grey	19.9	16.6	3.3	18.9	2.9	-0.4	16.5	13.9	2.6	3.4	20.6061	2.7	19.4245	0.7
September 18th	Cold	Cloudy	17	4	8	120	Upper	Hard	Grey siltstone	2	10	Intermediate	8.4	552	0.94	0	2.5GY 7/1	Light olive grey	18	15.3	2.7	17.1	1	-1.7	15.7	13.2	2.5	2.3	14.6497	2.1	15.9091	0.2
September 18th	Cold	Cloudy	17	4	8	120	Upper	Soft	Orange limestone	5	19	Intermediate	6.8	604	0.94	0	2.5Y 6/4	Dull yellow	17.2	15.4	1.8	16.4	0.2	-1.6	15.1	13.1	2	2.1	13.9073	2.3	17.5573	-0.2
September 18th	Cold	Cloudy	17	4	8	120	Upper	Soft	White limestone	6	14	Thin	6.5	830	0.97	4	2.5Y 8/1	Light grey	17.1	13.8	3.3	16.3	0.1	-3.2	14.8	12.5	2.3	2.3	15.5405	1.3	10.4	1
September 18th	Cold	Cloudy	17	4	8	120	Upper	Soft	Fossiliferous sandstone	4	35	Thick	15	704	0.91	0	2.5Y 5/6	Yellowish brown	18.1	15.4	2.7	16.3	1.1	-1.6	15.3	13.2	2.1	2.8	18.3007	2.2	16.6667	0.6
September 18th	Cold	Cloudy	17	4	8	120	Upper	Hard	Purple siltstone	1	5	Thin	6.5	508	0.92	0	10R 6/1	Reddish grey	19.4	16.1	3.3	18.8	2.4	-0.9	16.1	13.6	2.5	3.3	20.4969	2.5	18.3824	0.8
September 18th	Cold	Cloudy	17	4	8	120	Upper	Hard	Quartzite	3	28	Intermediate	12.6	328	0.95	0	10YR 8/1	Light grey	15.1	12.9	2.2	13.5	-1.9	-4.1	13.8	11.3	2.5	1.3	9.42029	1.6	14.1593	-0.3
September 18th	Cold	Cloudy	17	4	8	120	Upper	Soft	Orange limestone	5	24	Thin	6	620	0.94	0	2.5Y 7/4	Light yellow	16.7	14.8	1.9	15.4	-0.3	-2.2	14.5	12.7	1.8	2.2	15.1724	2.1	16.5354	0.1
September 18th	Cold	Cloudy	17	4	8	120	Upper	Hard	Quartzite	3	27	Intermediate	11.1	444	0.94	0	10YR 8/1	Light grey	15	12.8	2.2	13.9	-2	-4.2	13.3	10.9	2.4	1.7	12.782	1.9	17.4312	-0.2
September 18th	Cold	Cloudy	17	4	8	120	Upper	Soft	White limestone	6	18	Thick	12	544	0.85	1	2.5Y 8/1	Light grey	15.8	13.2	2.6	14.4	-1.2	-3.8	14.4	12.4	2	1.4	9.72222	0.8	6.45161	0.6
September 18th	Cold	Cloudy	17	4	8	120	Upper	Soft	Fossiliferous sandstone	4	34	Thick	13.9	436	0.76	0	2.5Y 7/4	Light yellow	17.8	14.6	3.2	17.1	0.8	-2.4	15.5	13.2	2.3	2.3	14.8387	1.4	10.6061	0.9
September 18th	Cold	Cloudy	17	4	8	120	Upper	Hard	Purple siltstone	1	6	Thick	13.5	596	0.94	0	7.5R 5/1	Reddish grey	19.8	16.8	3	18.9	2.8	-0.2	16.8	14.4	2.4	3	17.8571	2.4	16.6667	0.6
September 18th	Cold	Cloudy	17	4	8	120	Upper	Hard	Quartzite	3	26	Thin	7.9	500	0.97	0	10YR 7/2	Greyish yellow brown	16.8	14.3	2.5	15.2	-0.2	-2.7	14.2	12.3	1.9	2.6	18.3099	2	16.2602	0.6
September 18th	Cold	Cloudy	17	4	8	120	Upper	Soft	White limestone	6	17	Intermediate	9.5	444	0.95	0	2.5Y 8/1	Light grey	15.2	13.4	1.8	14.2	-1.8	-3.6	13.5	11.9	1.6	1.7	12.5926	1.5	12.605	0.2
September 18th	Cold	Cloudy	17	4	8	120	Upper	Hard	Grey siltstone	2	8	Intermediate	8.1	592	0.97	0	2.5GY 6/1	Olive grey	18.5	15.7	2.8	17.6	1.5	-1.3	15.7	13.5	2.2	2.8	17.8344	2.2	16.2963	0.6
September 18th	Cold	Cloudy	17	4	8	120	Upper	Soft	Fossiliferous sandstone	4	32	Intermediate	7.9	524	0.92	0	2.5Y 7/4	Light yellow	17	14.3	2.7	15.9	0	-2.7	15	13	2	2	13.3333	1.3	10	0.7
September 18th	Cold	Cloudy	17	4	8	120	Lower	Hard	Purple siltstone	1	3	Intermediate	11.6	354	0.91	0	10R 5/1	Reddish grey	17.8	14.7	3.1	15.8	0.8	-2.3	15.7	13.4	2.3	2.1	13.3758	1.3	9.70149	0.8
September 18th	Cold	Cloudy	17	4	8	120	Lower	Soft	Orange limestone	5	21	Thick	12.4	608	0.91	0	2.5Y 8/4	Pale yellow	15.5	13.3	2.2	14.2	-1.5	-3.7	14.5	12.1	2.4	1	6.89655	1.2	9.91736	-0.2
September 18th	Cold	Cloudy	17	4	8	120	Lower	Hard	Quartzite	3	25	Thin	9.6	584	0.92	0	10YR 6/2	Greyish yellow brown	18.8	15.3	3.5	16.6	1.8	-1.7	16.1	13.3	2.8	2.7	16.7702	2	15.0376	0.7
September 18th	Cold	Cloudy	17	4	8	120	Lower	Soft	Fossiliferous sandstone	4	33	Intermediate	8.6	680	0.91	0	2.5Y 6/4	Dull yellow	18.3	15.6	2.7	16.3	1.3	-1.4	15.8	13.6	2.2	2.5	15.8228	2	14.7059	0.5
September 18th	Cold	Cloudy	17	4	8	120	Lower	Hard	Grey siltstone	2	12	Thin	7.5	576	0.94	0	N 6/0	Grey	21.9	17.4	4.5	18.3	4.9	0.4	18.4	14.9	3.5	3.5	19.0217	2.5	16.7785	1
September 18th	Cold	Cloudy	17	4	8	120	Lower	Soft	Orange limestone	5	20	Thick	11.7	420	0.97	0	10YR 8/3	Light yellow	16.2	13.8	2.4	14.9	-0.8	-3.2	14.5	12.4	2.1	1.7	11.7241	1.4	11.2903	0.3
September 18th	Cold	Cloudy	17	4	8	120	Lower	Hard	Quartzite	3	29	Thick	14.1	368	0.94	0	10YR 7/2	Greyish yellow brown	17.3	15.3	2	15.7	0.3	-1.7	15.1	13.1	2	2.2	14.5695	2.2	16.7939	0
September 18th	Cold	Cloudy	17	4	8	120	Lower	Soft	White limestone	6	16	Thick	12.3	412	0.94	0	2.5Y 8/1	Light grey	16.2	13.9	2.3	14.6	-0.8	-3.1	15	12.9	2.1	1.2	8	1	7.75194	0.2
September 18th	Cold	Cloudy	17	4	8	120	Lower	Hard	Grey siltstone	2	9	Thick	12.6	532	0.97	0	2.5GY 7/1	Light olive grey	18.5	16.2	2.3	16.8	1.5	-0.8	16.6	14	2.6	1.9	11.4458	2.2	15.7143	-0.3
September 18th	Cold	Cloudy	17	4	8	120	Lower	Hard	Quartzite	3	30	Thick	14.3	588	0.9	0	10YR 8/1	Light grey	17.7	14.7	3	16	0.7	-2.3	15.2	13.1	2.1	2.5	16.4474	1.6	12.2137	0.9
September 18th	Cold	Cloudy	17	4	8	120	Lower	Hard	Purple siltstone	1	4	Thin	6.4	608	0.95	0	10R 6/1	Reddish grey	20.5	17.8	2.7	18.5	3.5	0.8	17.4	15.2	2.2	3.1	17.8161	2.6	17.1053	0.5
September 18th	Cold	Cloudy	17	4	8	120	Lower	Soft	Fossiliferous sandstone	4	36	Thin	7.5	742	0.88	1	2.5Y 7/4	Light yellow	19.9	16.5	3.4	17.3	2.9	-0.5	16.8	14.4	2.4	3.1	18.4524	2.1	14.5833	1
September 18th	Cold	Cloudy	17	4	8	120	Lower	Soft	Fossiliferous sandstone	4	31	Thin	6.9	580	0.94	0	2.5Y 7/6	Yellowish brown	19.3	16	3.3	17	2.3	-1	15.7	13.9	1.8	3.6	22.9299	2.1	15.1079	1.5
September 18th	Cold	Cloudy	17	4	8	120	Lower	Soft	White limestone	6	15	Thin	5.9	564	0.92	2	2.5Y 8/1	Light grey	17.5	15.3	2.2	16.3	0.5	-1.7	16	14.3	1.7	1.5	9.375	1	6.99301	0.5
September 18th	Cold	Cloudy	17	4	8	120	Lower	Soft	Orange limestone	5	22	Intermediate	7.6	584	0.94	0	2.5Y 7/4	Light yellow	18.7	15.6	3.1	16.2	1.7	-1.4	16.6	13.7	2.9	2.1	12.6506	1.9	13.8686	0.2
September 18th	Cold	Cloudy	17	4	8	120	Lower	Hard	Grey siltstone	2	7	Thick	12.3	544	0.95	0	N 7/0	Greyish white	19.4	16.8	2.6	17.6	2.4	-0.2	16.1	14.5	1.6	3.3	20.4969	2.3	15.8621	1
September 18th	Cold	Cloudy	17	4	8	120	Lower	Soft	Orange limestone	5	23	Thin	6.1	792	0.94	0	5Y 8/3	Pale yellow	18.9	15.3	3.6	16.3	1.9	-1.7	16.1	13.8	2.3	2.8	17.3913	1.5	10.8696	1.3
September 18th	Cold	Cloudy	17	4	8	120	Lower	Hard	Purple siltstone	1	2	Thick	14.3	456	0.94	0	7.5YR 5/1	Brownish grey	19.4	16.7	2.7	17.8	2.4	-0.3	16.2	14.1	2.1	3.2	19.7531	2.6	18.4397	0.6
September 18th	Cold	Cloudy	17	4	8	120	Lower	Soft	White limestone	6	13	Intermediate	9.4	492	0.91	2	2.5Y 8/1	Light grey	17.7	14.8	2.9	16.1	0.7	-2.2	15.3	13.1	2.2	2.4	15.6863	1.7	12.9771	0.7
September 18th	Cold	Cloudy	17	4	8	120	Lower	Hard	Grey siltstone	2	11	Thin	7.3	696	0.92	0	N 7/0	Greyish white	21.5	17.5	4	18	4.5	0.5	17.5	14.8	2.7	4	22.8571	2.7	18.2432	1.3
September 18th	Cold	Cloudy	17	4	8	120	Lower	Hard	Purple siltstone	1	1	Intermediate	11.2	408	0.94	0	2.5YR 5/1	Reddish grey	21.5	18.2	3.3	19.1	4.5	1.2	17.8	15.5	2.3	3.7	20.7865	2.7	17.4194	1
September 18th	Cold	Cloudy	17	4	8	120	Lower	Hard	Grey siltstone	2	10	Intermediate	8.4	556	0.94	0	2.5GY 7/1	Light olive grey	20.4	17.5	2.9	18.2	3.4	0.5	17.3	15.3	2	3.1	17.9191	2.2	14.3791	0.9
September 18th	Cold	Cloudy	17	4	8	120	Lower	Soft	Orange limestone	5	19	Intermediate	6.8	528	0.92	0	2.5Y 6/4	Dull yellow	19.2	16.5	2.7	17.3	2.2	-0.5	16.4	14.3	2.1	2.8	17.0732	2.2	15.3846	0.6
September 18th	Cold	Cloudy	17	4	8	120	Lower	Soft	White limestone	6	14	Thin	6.5	816	0.95	2	2.5Y 8/1	Light grey	18.8	15.2	3.6	16.5	1.8	-1.8	15.8	13.6	2.2	3	18.9873	1.6	11.7647	1.4
September 18th	Cold	Cloudy	17	4	8	120	Lower	Soft	Fossiliferous sandstone	4	35	Thick	15	664	0.91	1	2.5Y 5/6	Yellowish brown	17.8	14.9	2.9	16.2	0.8	-2.1	15.8	13.7	2.1	2	12.6582	1.2	8.75912	0.8
September 18th	Cold	Cloudy	17	4	8	120	Lower	Hard	Purple siltstone	1	5	Thin	6.5	496	0.97	0	10R 6/1	Reddish grey	22	18.8	3.2	19.4	5	1.8	18.4	16.3	2.1	3.6	19.5652	2.5	15.3374	1.1
September 18th	Cold	Cloudy	17	4	8	120	Lower	Hard	Quartzite	3	28	Intermediate	12.6	464	0.92	0	10YR 8/1	Light grey	17.8	15.4	2.4	16.4	0.8	-1.6	16.2	14.1	2.1	1.6	9.87654	1.3	9.21986	0.3
September 18th	Cold	Cloudy	17	4	8	120	Lower	Soft	Orange limestone	5	24	Thin	6	588	0.94	1	2.5Y 7/4	Light yellow	18.3	15.8	2.5	16.5	1.3	-1.2	16.2	14.1	2.1	2.1	12.963	1.7	12.0567	0.4
September 18th	Cold	Cloudy	17	4	8	120	Lower	Hard	Quartzite	3	27	Intermediate	11.1	448	0.94	0	10YR 8/1	Light grey	17.5	15	2.5	16.1	0.5	-2	15.8	13.9	1.9	1.7	10.7595	1.1	7.91367	0.6
September 18th	Cold	Cloudy	17	4	8	120	Lower	Soft	White limestone	6	18	Thick	12	504	0.81	0	2.5Y 8/1	Light grey	17	14.1	2.9	14.8	0	-2.9	14.8	13	1.8	2.2	14.8649	1.1	8.46154	1.1
September 18th	Cold	Cloudy	17	4	8	120	Lower	Soft	Fossiliferous sandstone	4	34	Thick	13.9	520	0.95	0	2.5Y 7/4	Light yellow	18.8	15.1	3.7	16.6	1.8	-1.9	16	13.8	2.2	2.8	17.5	1.3	9.42029	1.5
September 18th	Cold	Cloudy	17	4	8	120	Lower	Hard	Purple siltstone	1	6	Thick	13.5	516	1	0	7.5R 5/1	Reddish grey	20.3	17.3	3	18.2	3.3	0.3	17.3	14.9	2.4	3	17.341	2.4	16.1074	0.6
September 18th	Cold	Cloudy	17	4	8	120	Lower	Hard	Quartzite	3	26	Thin	7.9	496	0.94	0	10YR 7/2	Greyish yellow brown	19.3	16.9	2.4	18.6	2.3	-0.1	17	15.5	1.5	2.3	13.5294	1.4	9.03226	0.9
September 18th	Cold	Cloudy	17	4	8	120	Lower	Soft	White limestone	6	17	Intermediate	9.5	448	0.92	1	2.5Y 8/1	Light grey	17.3	14.8	2.5	15.6	0.3	-2.2	15.8	13.7	2.1	1.5	9.49367	1.1	8.0292	0.4
September 18th	Cold	Cloudy	17	4	8	120	Lower	Hard	Grey siltstone	2	8	Intermediate	8.1	584	0.97	0	2.5GY 6/1	Olive grey	20.5	17.9	2.6	18.3	3.5	0.9	17.9	15.8	2.1	2.6	14.5251	2.1	13.2911	0.5
September 18th	Cold	Cloudy	17	4	8	120	Lower	Soft	Fossiliferous sandstone	4	32	Intermediate	7.9	536	0.91	0	2.5Y 7/4	Light yellow	18.8	16	2.8	17.3	1.8	-1	16.3	14.6	1.7	2.5	15.3374	1.4	9.58904	1.1
September 18th	Cold	Cloudy	17	4	8	180	Upper	Hard	Purple siltstone	1	3	Intermediate	11.6	424	0.91	0	10R 5/1	Reddish grey	23.6	19.9	3.7	22.3	6.6	2.9	21.1	18.5	2.6	2.5	11.8483	1.4	7.56757	1.1
September 18th	Cold	Cloudy	17	4	8	180	Upper	Soft	Orange limestone	5	21	Thick	12.4	676	0.88	1	2.5Y 8/4	Pale yellow	19.6	16.4	3.2	18.4	2.6	-0.6	18.1	15.1	3	1.5	8.28729	1.3	8.60927	0.2
September 18th	Cold	Cloudy	17	4	8	180	Upper	Hard	Quartzite	3	25	Thin	9.6	636	0.87	0	10YR 6/2	Greyish yellow brown	20.9	18.3	2.6	19.3	3.9	1.3	18.7	16.3	2.4	2.2	11.7647	2	12.2699	0.2
September 18th	Cold	Cloudy	17	4	8	180	Upper	Soft	Fossiliferous sandstone	4	33	Intermediate	8.6	672	0.85	0	2.5Y 6/4	Dull yellow	20.3	17.1	3.2	19.8	3.3	0.1	18.1	15.6	2.5	2.2	12.1547	1.5	9.61538	0.7
September 18th	Cold	Cloudy	17	4	8	180	Upper	Hard	Grey siltstone	2	12	Thin	7.5	580	0.95	0	N 6/0	Grey	23.3	19.6	3.7	22.6	6.3	2.6	21.1	18.2	2.9	2.2	10.4265	1.4	7.69231	0.8
September 18th	Cold	Cloudy	17	4	8	180	Upper	Soft	Orange limestone	5	20	Thick	11.7	356	0.92	0	10YR 8/3	Light yellow	19.7	16.8	2.9	18.8	2.7	-0.2	17.8	15.3	2.5	1.9	10.6742	1.5	9.80392	0.4
September 18th	Cold	Cloudy	17	4	8	180	Upper	Hard	Quartzite	3	29	Thick	14.1	400	0.94	1	10YR 7/2	Greyish yellow brown	18.8	17	1.8	18.7	1.8	0	16.5	14.4	2.1	2.3	13.9394	2.6	18.0556	-0.3
September 18th	Cold	Cloudy	17	4	8	180	Upper	Soft	White limestone	6	16	Thick	12.3	460	0.94	1	2.5Y 8/1	Light grey	18.3	15.7	2.6	17.1	1.3	-1.3	16	13.7	2.3	2.3	14.375	2	14.5985	0.3
September 18th	Cold	Cloudy	17	4	8	180	Upper	Hard	Grey siltstone	2	9	Thick	12.6	624	0.92	0	2.5GY 7/1	Light olive grey	22.7	19.4	3.3	20.8	5.7	2.4	19.1	16.6	2.5	3.6	18.8482	2.8	16.8675	0.8
September 18th	Cold	Cloudy	17	4	8	180	Upper	Hard	Quartzite	3	30	Thick	14.3	376	0.96	0	10YR 8/1	Light grey	17.7	15	2.7	16.5	0.7	-2	16	13.1	2.9	1.7	10.625	1.9	14.5038	-0.2
September 18th	Cold	Cloudy	17	4	8	180	Upper	Hard	Purple siltstone	1	4	Thin	6.4	608	0.94	0	10R 6/1	Reddish grey	21.5	18.4	3.1	20.3	4.5	1.4	18.3	16.5	1.8	3.2	17.4863	1.9	11.5152	1.3
September 18th	Cold	Cloudy	17	4	8	180	Upper	Soft	Fossiliferous sandstone	4	36	Thin	7.5	732	0.86	0	2.5Y 7/4	Light yellow	20.8	17.4	3.4	18.5	3.8	0.4	18	15	3	2.8	15.5556	2.4	16	0.4
September 18th	Cold	Cloudy	17	4	8	180	Upper	Soft	Fossiliferous sandstone	4	31	Thin	6.9	588	0.94	0	2.5Y 7/6	Yellowish brown	20.2	16.9	3.3	19.2	3.2	-0.1	17.7	15.5	2.2	2.5	14.1243	1.4	9.03226	1.1
September 18th	Cold	Cloudy	17	4	8	180	Upper	Soft	White limestone	6	15	Thin	5.9	612	0.82	1	2.5Y 8/1	Light grey	18.5	15.4	3.1	16.7	1.5	-1.6	16.8	13.8	3	1.7	10.119	1.6	11.5942	0.1
September 18th	Cold	Cloudy	17	4	8	180	Upper	Soft	Orange limestone	5	22	Intermediate	7.6	632	0.94	0	2.5Y 7/4	Light yellow	19.9	16.7	3.2	18.9	2.9	-0.3	17.6	15.7	1.9	2.3	13.0682	1	6.36943	1.3
September 18th	Cold	Cloudy	17	4	8	180	Upper	Hard	Grey siltstone	2	7	Thick	12.3	436	0.94	0	N 7/0	Greyish white	21.6	17.7	3.9	20.6	4.6	0.7	18.7	16.2	2.5	2.9	15.508	1.5	9.25926	1.4
September 18th	Cold	Cloudy	17	4	8	180	Upper	Soft	Orange limestone	5	23	Thin	6.1	808	0.91	0	5Y 8/3	Pale yellow	18.6	16.8	1.8	17.9	1.6	-0.2	16.6	14.8	1.8	2	12.0482	2	13.5135	0
September 18th	Cold	Cloudy	17	4	8	180	Upper	Hard	Purple siltstone	1	2	Thick	14.3	484	0.97	0	7.5YR 5/1	Brownish grey	22.3	19.3	3	21.4	5.3	2.3	19.4	17.4	2	2.9	14.9485	1.9	10.9195	1
September 18th	Cold	Cloudy	17	4	8	180	Upper	Soft	White limestone	6	13	Intermediate	9.4	592	0.91	2	2.5Y 8/1	Light grey	17.8	15.6	2.2	16.5	0.8	-1.4	16.1	13.8	2.3	1.7	10.559	1.8	13.0435	-0.1
September 18th	Cold	Cloudy	17	4	8	180	Upper	Hard	Grey siltstone	2	11	Thin	7.3	688	0.94	0	N 7/0	Greyish white	22.6	19.1	3.5	21.8	5.6	2.1	19.5	16.6	2.9	3.1	15.8974	2.5	15.0602	0.6
September 18th	Cold	Cloudy	17	4	8	180	Upper	Hard	Purple siltstone	1	1	Intermediate	11.2	384	0.92	0	2.5YR 5/1	Reddish grey	22.9	19.3	3.6	21.7	5.9	2.3	19.9	16.6	3.3	3	15.0754	2.7	16.2651	0.3
September 18th	Cold	Cloudy	17	4	8	180	Upper	Hard	Grey siltstone	2	10	Intermediate	8.4	552	0.94	0	2.5GY 7/1	Light olive grey	21.1	17.3	3.8	19.9	4.1	0.3	18	15.3	2.7	3.1	17.2222	2	13.0719	1.1
September 18th	Cold	Cloudy	17	4	8	180	Upper	Soft	Orange limestone	5	19	Intermediate	6.8	604	0.94	0	2.5Y 6/4	Dull yellow	19.7	16.8	2.9	19.2	2.7	-0.2	17.2	15.4	1.8	2.5	14.5349	1.4	9.09091	1.1
September 18th	Cold	Cloudy	17	4	8	180	Upper	Soft	White limestone	6	14	Thin	6.5	830	0.97	4	2.5Y 8/1	Light grey	19.1	15.3	3.8	18.3	2.1	-1.7	17.1	13.8	3.3	2	11.6959	1.5	10.8696	0.5
September 18th	Cold	Cloudy	17	4	8	180	Upper	Soft	Fossiliferous sandstone	4	35	Thick	15	704	0.91	0	2.5Y 5/6	Yellowish brown	21.2	18.2	3	19.1	4.2	1.2	18.1	15.4	2.7	3.1	17.1271	2.8	18.1818	0.3
September 18th	Cold	Cloudy	17	4	8	180	Upper	Hard	Purple siltstone	1	5	Thin	6.5	508	0.92	0	10R 6/1	Reddish grey	22.7	18.7	4	21.9	5.7	1.7	19.4	16.1	3.3	3.3	17.0103	2.6	16.1491	0.7
September 18th	Cold	Cloudy	17	4	8	180	Upper	Hard	Quartzite	3	28	Intermediate	12.6	328	0.95	0	10YR 8/1	Light grey	17.1	14.5	2.6	15.9	0.1	-2.5	15.1	12.9	2.2	2	13.245	1.6	12.4031	0.4
September 18th	Cold	Cloudy	17	4	8	180	Upper	Soft	Orange limestone	5	24	Thin	6	620	0.94	0	2.5Y 7/4	Light yellow	19.2	16.3	2.9	17.8	2.2	-0.7	16.7	14.8	1.9	2.5	14.9701	1.5	10.1351	1
September 18th	Cold	Cloudy	17	4	8	180	Upper	Hard	Quartzite	3	27	Intermediate	11.1	444	0.94	0	10YR 8/1	Light grey	16.9	14.6	2.3	15.7	-0.1	-2.4	15	12.8	2.2	1.9	12.6667	1.8	14.0625	0.1
September 18th	Cold	Cloudy	17	4	8	180	Upper	Soft	White limestone	6	18	Thick	12	544	0.85	1	2.5Y 8/1	Light grey	17.5	14.9	2.6	16.3	0.5	-2.1	15.8	13.2	2.6	1.7	10.7595	1.7	12.8788	0
September 18th	Cold	Cloudy	17	4	8	180	Upper	Soft	Fossiliferous sandstone	4	34	Thick	13.9	436	0.76	0	2.5Y 7/4	Light yellow	20.4	16.3	4.1	20.1	3.4	-0.7	17.8	14.6	3.2	2.6	14.6067	1.7	11.6438	0.9
September 18th	Cold	Cloudy	17	4	8	180	Upper	Hard	Purple siltstone	1	6	Thick	13.5	596	0.94	0	7.5R 5/1	Reddish grey	22.6	19	3.6	21.8	5.6	2	19.8	16.8	3	2.8	14.1414	2.2	13.0952	0.6
September 18th	Cold	Cloudy	17	4	8	180	Upper	Hard	Quartzite	3	26	Thin	7.9	500	0.97	0	10YR 7/2	Greyish yellow brown	19.6	16.1	3.5	17.3	2.6	-0.9	16.8	14.3	2.5	2.8	16.6667	1.8	12.5874	1
September 18th	Cold	Cloudy	17	4	8	180	Upper	Soft	White limestone	6	17	Intermediate	9.5	444	0.95	0	2.5Y 8/1	Light grey	17.2	14.5	2.7	16.2	0.2	-2.5	15.2	13.4	1.8	2	13.1579	1.1	8.20896	0.9
September 18th	Cold	Cloudy	17	4	8	180	Upper	Hard	Grey siltstone	2	8	Intermediate	8.1	592	0.97	0	2.5GY 6/1	Olive grey	21	17.4	3.6	20.1	4	0.4	18.5	15.7	2.8	2.5	13.5135	1.7	10.828	0.8
September 18th	Cold	Cloudy	17	4	8	180	Upper	Soft	Fossiliferous sandstone	4	32	Intermediate	7.9	524	0.92	0	2.5Y 7/4	Light yellow	19.3	16.9	2.4	18.5	2.3	-0.1	17	14.3	2.7	2.3	13.5294	2.6	18.1818	-0.3
September 18th	Cold	Cloudy	17	4	8	180	Lower	Hard	Purple siltstone	1	3	Intermediate	11.6	354	0.91	0	10R 5/1	Reddish grey	21.2	17.8	3.4	18.6	4.2	0.8	17.8	14.7	3.1	3.4	19.1011	3.1	21.0884	0.3
September 18th	Cold	Cloudy	17	4	8	180	Lower	Soft	Orange limestone	5	21	Thick	12.4	608	0.91	0	2.5Y 8/4	Pale yellow	17.5	14.6	2.9	15.7	0.5	-2.4	15.5	13.3	2.2	2	12.9032	1.3	9.77444	0.7
September 18th	Cold	Cloudy	17	4	8	180	Lower	Hard	Quartzite	3	25	Thin	9.6	584	0.92	0	10YR 6/2	Greyish yellow brown	20.1	17	3.1	18.5	3.1	0	18.8	15.3	3.5	1.3	6.91489	1.7	11.1111	-0.4
September 18th	Cold	Cloudy	17	4	8	180	Lower	Soft	Fossiliferous sandstone	4	33	Intermediate	8.6	680	0.91	0	2.5Y 6/4	Dull yellow	19.1	16	3.1	17.6	2.1	-1	18.3	15.6	2.7	0.8	4.37158	0.4	2.5641	0.4
September 18th	Cold	Cloudy	17	4	8	180	Lower	Hard	Grey siltstone	2	12	Thin	7.5	576	0.94	0	N 6/0	Grey	23.3	18.8	4.5	19.7	6.3	1.8	21.9	17.4	4.5	1.4	6.39269	1.4	8.04598	0
September 18th	Cold	Cloudy	17	4	8	180	Lower	Soft	Orange limestone	5	20	Thick	11.7	420	0.97	0	10YR 8/3	Light yellow	17.1	14.8	2.3	15.6	0.1	-2.2	16.2	13.8	2.4	0.9	5.55556	1	7.24638	-0.1
September 18th	Cold	Cloudy	17	4	8	180	Lower	Hard	Quartzite	3	29	Thick	14.1	368	0.94	0	10YR 7/2	Greyish yellow brown	18.2	16.3	1.9	16.8	1.2	-0.7	17.3	15.3	2	0.9	5.20231	1	6.53595	-0.1
September 18th	Cold	Cloudy	17	4	8	180	Lower	Soft	White limestone	6	16	Thick	12.3	412	0.94	0	2.5Y 8/1	Light grey	17.3	14.9	2.4	16.3	0.3	-2.1	16.2	13.9	2.3	1.1	6.79012	1	7.19424	0.1
September 18th	Cold	Cloudy	17	4	8	180	Lower	Hard	Grey siltstone	2	9	Thick	12.6	532	0.97	0	2.5GY 7/1	Light olive grey	20.7	18.1	2.6	18.9	3.7	1.1	18.5	16.2	2.3	2.2	11.8919	1.9	11.7284	0.3
September 18th	Cold	Cloudy	17	4	8	180	Lower	Hard	Quartzite	3	30	Thick	14.3	588	0.9	0	10YR 8/1	Light grey	18.1	15.8	2.3	17.1	1.1	-1.2	17.7	14.7	3	0.4	2.25989	1.1	7.48299	-0.7
September 18th	Cold	Cloudy	17	4	8	180	Lower	Hard	Purple siltstone	1	4	Thin	6.4	608	0.95	0	10R 6/1	Reddish grey	22.3	19.7	2.6	20.2	5.3	2.7	20.5	17.8	2.7	1.8	8.78049	1.9	10.6742	-0.1
September 18th	Cold	Cloudy	17	4	8	180	Lower	Soft	Fossiliferous sandstone	4	36	Thin	7.5	742	0.88	1	2.5Y 7/4	Light yellow	21.3	17.2	4.1	18.4	4.3	0.2	19.9	16.5	3.4	1.4	7.03518	0.7	4.24242	0.7
September 18th	Cold	Cloudy	17	4	8	180	Lower	Soft	Fossiliferous sandstone	4	31	Thin	6.9	580	0.94	0	2.5Y 7/6	Yellowish brown	21	17.3	3.7	18.8	4	0.3	19.3	16	3.3	1.7	8.80829	1.3	8.125	0.4
September 18th	Cold	Cloudy	17	4	8	180	Lower	Soft	White limestone	6	15	Thin	5.9	564	0.92	2	2.5Y 8/1	Light grey	20.5	16.5	4	17.3	3.5	-0.5	17.5	15.3	2.2	3	17.1429	1.2	7.84314	1.8
September 18th	Cold	Cloudy	17	4	8	180	Lower	Soft	Orange limestone	5	22	Intermediate	7.6	584	0.94	0	2.5Y 7/4	Light yellow	20.8	16.9	3.9	17.5	3.8	-0.1	18.7	15.6	3.1	2.1	11.2299	1.3	8.33333	0.8
September 18th	Cold	Cloudy	17	4	8	180	Lower	Hard	Grey siltstone	2	7	Thick	12.3	544	0.95	0	N 7/0	Greyish white	21.2	18.5	2.7	19.3	4.2	1.5	19.4	16.8	2.6	1.8	9.27835	1.7	10.119	0.1
September 18th	Cold	Cloudy	17	4	8	180	Lower	Soft	Orange limestone	5	23	Thin	6.1	792	0.94	0	5Y 8/3	Pale yellow	20.1	16.9	3.2	17.3	3.1	-0.1	18.9	15.3	3.6	1.2	6.34921	1.6	10.4575	-0.4
September 18th	Cold	Cloudy	17	4	8	180	Lower	Hard	Purple siltstone	1	2	Thick	14.3	456	0.94	0	7.5YR 5/1	Brownish grey	21.7	18.3	3.4	19.6	4.7	1.3	19.4	16.7	2.7	2.3	11.8557	1.6	9.58084	0.7
September 18th	Cold	Cloudy	17	4	8	180	Lower	Soft	White limestone	6	13	Intermediate	9.4	492	0.91	2	2.5Y 8/1	Light grey	18.6	15.8	2.8	17.6	1.6	-1.2	17.7	14.8	2.9	0.9	5.08475	1	6.75676	-0.1
September 18th	Cold	Cloudy	17	4	8	180	Lower	Hard	Grey siltstone	2	11	Thin	7.3	696	0.92	0	N 7/0	Greyish white	23.1	19.4	3.7	20.3	6.1	2.4	21.5	17.5	4	1.6	7.44186	1.9	10.8571	-0.3
September 18th	Cold	Cloudy	17	4	8	180	Lower	Hard	Purple siltstone	1	1	Intermediate	11.2	408	0.94	0	2.5YR 5/1	Reddish grey	23.8	20.3	3.5	20.9	6.8	3.3	21.5	18.2	3.3	2.3	10.6977	2.1	11.5385	0.2
September 18th	Cold	Cloudy	17	4	8	180	Lower	Hard	Grey siltstone	2	10	Intermediate	8.4	556	0.94	0	2.5GY 7/1	Light olive grey	22.2	18.9	3.3	19.7	5.2	1.9	20.4	17.5	2.9	1.8	8.82353	1.4	8	0.4
September 18th	Cold	Cloudy	17	4	8	180	Lower	Soft	Orange limestone	5	19	Intermediate	6.8	528	0.92	0	2.5Y 6/4	Dull yellow	20.8	17.7	3.1	18.4	3.8	0.7	19.2	16.5	2.7	1.6	8.33333	1.2	7.27273	0.4
September 18th	Cold	Cloudy	17	4	8	180	Lower	Soft	White limestone	6	14	Thin	6.5	816	0.95	2	2.5Y 8/1	Light grey	19.7	16.5	3.2	17.5	2.7	-0.5	18.8	15.2	3.6	0.9	4.78723	1.3	8.55263	-0.4
September 18th	Cold	Cloudy	17	4	8	180	Lower	Soft	Fossiliferous sandstone	4	35	Thick	15	664	0.91	1	2.5Y 5/6	Yellowish brown	20.3	16.3	4	17.7	3.3	-0.7	17.8	14.9	2.9	2.5	14.0449	1.4	9.39597	1.1
September 18th	Cold	Cloudy	17	4	8	180	Lower	Hard	Purple siltstone	1	5	Thin	6.5	496	0.97	0	10R 6/1	Reddish grey	23.9	20.6	3.3	21.3	6.9	3.6	22	18.8	3.2	1.9	8.63636	1.8	9.57447	0.1
September 18th	Cold	Cloudy	17	4	8	180	Lower	Hard	Quartzite	3	28	Intermediate	12.6	464	0.92	0	10YR 8/1	Light grey	19.4	16.8	2.6	17.8	2.4	-0.2	17.8	15.4	2.4	1.6	8.98876	1.4	9.09091	0.2
September 18th	Cold	Cloudy	17	4	8	180	Lower	Soft	Orange limestone	5	24	Thin	6	588	0.94	1	2.5Y 7/4	Light yellow	20.8	17	3.8	18.1	3.8	0	18.3	15.8	2.5	2.5	13.6612	1.2	7.59494	1.3
September 18th	Cold	Cloudy	17	4	8	180	Lower	Hard	Quartzite	3	27	Intermediate	11.1	448	0.94	0	10YR 8/1	Light grey	19.3	16	3.3	17.1	2.3	-1	17.5	15	2.5	1.8	10.2857	1	6.66667	0.8
September 18th	Cold	Cloudy	17	4	8	180	Lower	Soft	White limestone	6	18	Thick	12	504	0.81	0	2.5Y 8/1	Light grey	18.6	15.2	3.4	15.9	1.6	-1.8	17	14.1	2.9	1.6	9.41176	1.1	7.80142	0.5
September 18th	Cold	Cloudy	17	4	8	180	Lower	Soft	Fossiliferous sandstone	4	34	Thick	13.9	520	0.95	0	2.5Y 7/4	Light yellow	20.6	16.6	4	18.5	3.6	-0.4	18.8	15.1	3.7	1.8	9.57447	1.5	9.93377	0.3
September 18th	Cold	Cloudy	17	4	8	180	Lower	Hard	Purple siltstone	1	6	Thick	13.5	516	1	0	7.5R 5/1	Reddish grey	22.5	20.1	2.4	20.8	5.5	3.1	20.3	17.3	3	2.2	10.8374	2.8	16.185	-0.6
September 18th	Cold	Cloudy	17	4	8	180	Lower	Hard	Quartzite	3	26	Thin	7.9	496	0.94	0	10YR 7/2	Greyish yellow brown	21	19.2	1.8	20.4	4	2.2	19.3	16.9	2.4	1.7	8.80829	2.3	13.6095	-0.6
September 18th	Cold	Cloudy	17	4	8	180	Lower	Soft	White limestone	6	17	Intermediate	9.5	448	0.92	1	2.5Y 8/1	Light grey	18.6	16.1	2.5	17	1.6	-0.9	17.3	14.8	2.5	1.3	7.51445	1.3	8.78378	0
September 18th	Cold	Cloudy	17	4	8	180	Lower	Hard	Grey siltstone	2	8	Intermediate	8.1	584	0.97	0	2.5GY 6/1	Olive grey	21.8	19.3	2.5	20.4	4.8	2.3	20.5	17.9	2.6	1.3	6.34146	1.4	7.82123	-0.1
September 18th	Cold	Cloudy	17	4	8	180	Lower	Soft	Fossiliferous sandstone	4	32	Intermediate	7.9	536	0.91	0	2.5Y 7/4	Light yellow	19.9	17.1	2.8	18.3	2.9	0.1	18.8	16	2.8	1.1	5.85106	1.1	6.875	-3.55271e-15
September 18th	Cold	Cloudy	17	4	7	240	Upper	Hard	Purple siltstone	1	3	Intermediate	11.6	424	0.91	0	10R 5/1	Reddish grey	26.7	22.2	4.5	25.9	9.7	5.2	23.6	19.9	3.7	3.1	13.1356	2.3	11.5578	0.8
September 18th	Cold	Cloudy	17	4	7	240	Upper	Soft	Orange limestone	5	21	Thick	12.4	676	0.88	1	2.5Y 8/4	Pale yellow	21.9	18.1	3.8	20.6	4.9	1.1	19.6	16.4	3.2	2.3	11.7347	1.7	10.3659	0.6
September 18th	Cold	Cloudy	17	4	7	240	Upper	Hard	Quartzite	3	25	Thin	9.6	636	0.87	0	10YR 6/2	Greyish yellow brown	23.4	20.7	2.7	21.3	6.4	3.7	20.9	18.3	2.6	2.5	11.9617	2.4	13.1148	0.1
September 18th	Cold	Cloudy	17	4	7	240	Upper	Soft	Fossiliferous sandstone	4	33	Intermediate	8.6	672	0.85	0	2.5Y 6/4	Dull yellow	23.3	19.7	3.6	22.7	6.3	2.7	20.3	17.1	3.2	3	14.7783	2.6	15.2047	0.4
September 18th	Cold	Cloudy	17	4	7	240	Upper	Hard	Grey siltstone	2	12	Thin	7.5	580	0.95	0	N 6/0	Grey	26.1	22.9	3.2	25	9.1	5.9	23.3	19.6	3.7	2.8	12.0172	3.3	16.8367	-0.5
September 18th	Cold	Cloudy	17	4	7	240	Upper	Soft	Orange limestone	5	20	Thick	11.7	356	0.92	0	10YR 8/3	Light yellow	21.6	18.3	3.3	20.4	4.6	1.3	19.7	16.8	2.9	1.9	9.64467	1.5	8.92857	0.4
September 18th	Cold	Cloudy	17	4	7	240	Upper	Hard	Quartzite	3	29	Thick	14.1	400	0.94	1	10YR 7/2	Greyish yellow brown	21	18.9	2.1	20.7	4	1.9	18.8	17	1.8	2.2	11.7021	1.9	11.1765	0.3
September 18th	Cold	Cloudy	17	4	7	240	Upper	Soft	White limestone	6	16	Thick	12.3	460	0.94	1	2.5Y 8/1	Light grey	20.2	17.1	3.1	19	3.2	0.1	18.3	15.7	2.6	1.9	10.3825	1.4	8.9172	0.5
September 18th	Cold	Cloudy	17	4	7	240	Upper	Hard	Grey siltstone	2	9	Thick	12.6	624	0.92	0	2.5GY 7/1	Light olive grey	24.8	21.6	3.2	23.4	7.8	4.6	22.7	19.4	3.3	2.1	9.2511	2.2	11.3402	-0.1
September 18th	Cold	Cloudy	17	4	7	240	Upper	Hard	Quartzite	3	30	Thick	14.3	376	0.96	0	10YR 8/1	Light grey	20.6	16.6	4	18.4	3.6	-0.4	17.7	15	2.7	2.9	16.3842	1.6	10.6667	1.3
September 18th	Cold	Cloudy	17	4	7	240	Upper	Hard	Purple siltstone	1	4	Thin	6.4	608	0.94	0	10R 6/1	Reddish grey	23.8	20.2	3.6	22.6	6.8	3.2	21.5	18.4	3.1	2.3	10.6977	1.8	9.78261	0.5
September 18th	Cold	Cloudy	17	4	7	240	Upper	Soft	Fossiliferous sandstone	4	36	Thin	7.5	732	0.86	0	2.5Y 7/4	Light yellow	23.1	20.1	3	20.9	6.1	3.1	20.8	17.4	3.4	2.3	11.0577	2.7	15.5172	-0.4
September 18th	Cold	Cloudy	17	4	7	240	Upper	Soft	Fossiliferous sandstone	4	31	Thin	6.9	588	0.94	0	2.5Y 7/6	Yellowish brown	23	19.2	3.8	22.3	6	2.2	20.2	16.9	3.3	2.8	13.8614	2.3	13.6095	0.5
September 18th	Cold	Cloudy	17	4	7	240	Upper	Soft	White limestone	6	15	Thin	5.9	612	0.82	1	2.5Y 8/1	Light grey	21.3	17.4	3.9	18.9	4.3	0.4	18.5	15.4	3.1	2.8	15.1351	2	12.987	0.8
September 18th	Cold	Cloudy	17	4	7	240	Upper	Soft	Orange limestone	5	22	Intermediate	7.6	632	0.94	0	2.5Y 7/4	Light yellow	22.5	19.8	2.7	21.9	5.5	2.8	19.9	16.7	3.2	2.6	13.0653	3.1	18.5629	-0.5
September 18th	Cold	Cloudy	17	4	7	240	Upper	Hard	Grey siltstone	2	7	Thick	12.3	436	0.94	0	N 7/0	Greyish white	24.6	20.8	3.8	23.3	7.6	3.8	21.6	17.7	3.9	3	13.8889	3.1	17.5141	-0.1
September 18th	Cold	Cloudy	17	4	7	240	Upper	Soft	Orange limestone	5	23	Thin	6.1	808	0.91	0	5Y 8/3	Pale yellow	21.2	18	3.2	20.2	4.2	1	18.6	16.8	1.8	2.6	13.9785	1.2	7.14286	1.4
September 18th	Cold	Cloudy	17	4	7	240	Upper	Hard	Purple siltstone	1	2	Thick	14.3	484	0.97	0	7.5YR 5/1	Brownish grey	25.5	22	3.5	24.3	8.5	5	22.3	19.3	3	3.2	14.3498	2.7	13.9896	0.5
September 18th	Cold	Cloudy	17	4	7	240	Upper	Soft	White limestone	6	13	Intermediate	9.4	592	0.91	2	2.5Y 8/1	Light grey	20.3	17.4	2.9	18.8	3.3	0.4	17.8	15.6	2.2	2.5	14.0449	1.8	11.5385	0.7
September 18th	Cold	Cloudy	17	4	7	240	Upper	Hard	Grey siltstone	2	11	Thin	7.3	688	0.94	0	N 7/0	Greyish white	25.6	21.5	4.1	24.7	8.6	4.5	22.6	19.1	3.5	3	13.2743	2.4	12.5654	0.6
September 18th	Cold	Cloudy	17	4	7	240	Upper	Hard	Purple siltstone	1	1	Intermediate	11.2	384	0.92	0	2.5YR 5/1	Reddish grey	25.7	22.1	3.6	24.7	8.7	5.1	22.9	19.3	3.6	2.8	12.2271	2.8	14.5078	0
September 18th	Cold	Cloudy	17	4	7	240	Upper	Hard	Grey siltstone	2	10	Intermediate	8.4	552	0.94	0	2.5GY 7/1	Light olive grey	23.6	19.6	4	22.4	6.6	2.6	21.1	17.3	3.8	2.5	11.8483	2.3	13.2948	0.2
September 18th	Cold	Cloudy	17	4	7	240	Upper	Soft	Orange limestone	5	19	Intermediate	6.8	604	0.94	0	2.5Y 6/4	Dull yellow	22.3	19.4	2.9	21.4	5.3	2.4	19.7	16.8	2.9	2.6	13.198	2.6	15.4762	3.55271e-15
September 18th	Cold	Cloudy	17	4	7	240	Upper	Soft	White limestone	6	14	Thin	6.5	830	0.97	4	2.5Y 8/1	Light grey	21.3	17.9	3.4	19.6	4.3	0.9	19.1	15.3	3.8	2.2	11.5183	2.6	16.9935	-0.4
September 18th	Cold	Cloudy	17	4	7	240	Upper	Soft	Fossiliferous sandstone	4	35	Thick	15	704	0.91	0	2.5Y 5/6	Yellowish brown	24.2	20.8	3.4	23.1	7.2	3.8	21.2	18.2	3	3	14.1509	2.6	14.2857	0.4
September 18th	Cold	Cloudy	17	4	7	240	Upper	Hard	Purple siltstone	1	5	Thin	6.5	508	0.92	0	10R 6/1	Reddish grey	25.7	20.9	4.8	24.9	8.7	3.9	22.7	18.7	4	3	13.2159	2.2	11.7647	0.8
September 18th	Cold	Cloudy	17	4	7	240	Upper	Hard	Quartzite	3	28	Intermediate	12.6	328	0.95	0	10YR 8/1	Light grey	18.4	15.8	2.6	16.9	1.4	-1.2	17.1	14.5	2.6	1.3	7.60234	1.3	8.96552	-3.55271e-15
September 18th	Cold	Cloudy	17	4	7	240	Upper	Soft	Orange limestone	5	24	Thin	6	620	0.94	0	2.5Y 7/4	Light yellow	21.9	18.3	3.6	20.4	4.9	1.3	19.2	16.3	2.9	2.7	14.0625	2	12.2699	0.7
September 18th	Cold	Cloudy	17	4	7	240	Upper	Hard	Quartzite	3	27	Intermediate	11.1	444	0.94	0	10YR 8/1	Light grey	18.4	16.1	2.3	17.6	1.4	-0.9	16.9	14.6	2.3	1.5	8.87574	1.5	10.274	0
September 18th	Cold	Cloudy	17	4	7	240	Upper	Soft	White limestone	6	18	Thick	12	544	0.85	1	2.5Y 8/1	Light grey	20.5	17	3.5	17.9	3.5	0	17.5	14.9	2.6	3	17.1429	2.1	14.094	0.9
September 18th	Cold	Cloudy	17	4	7	240	Upper	Soft	Fossiliferous sandstone	4	34	Thick	13.9	436	0.76	0	2.5Y 7/4	Light yellow	23.4	19.3	4.1	22.4	6.4	2.3	20.4	16.3	4.1	3	14.7059	3	18.4049	0
September 18th	Cold	Cloudy	17	4	7	240	Upper	Hard	Purple siltstone	1	6	Thick	13.5	596	0.94	0	7.5R 5/1	Reddish grey	26.2	22	4.2	24.9	9.2	5	22.6	19	3.6	3.6	15.9292	3	15.7895	0.6
September 18th	Cold	Cloudy	17	4	7	240	Upper	Hard	Quartzite	3	26	Thin	7.9	500	0.97	0	10YR 7/2	Greyish yellow brown	22	18.6	3.4	19.2	5	1.6	19.6	16.1	3.5	2.4	12.2449	2.5	15.528	-0.1
September 18th	Cold	Cloudy	17	4	7	240	Upper	Soft	White limestone	6	17	Intermediate	9.5	444	0.95	0	2.5Y 8/1	Light grey	19.8	16.8	3	18.5	2.8	-0.2	17.2	14.5	2.7	2.6	15.1163	2.3	15.8621	0.3
September 18th	Cold	Cloudy	17	4	7	240	Upper	Hard	Grey siltstone	2	8	Intermediate	8.1	592	0.97	0	2.5GY 6/1	Olive grey	24.3	19.6	4.7	22.8	7.3	2.6	21	17.4	3.6	3.3	15.7143	2.2	12.6437	1.1
September 18th	Cold	Cloudy	17	4	7	240	Upper	Soft	Fossiliferous sandstone	4	32	Intermediate	7.9	524	0.92	0	2.5Y 7/4	Light yellow	21.8	18.9	2.9	20.7	4.8	1.9	19.3	16.9	2.4	2.5	12.9534	2	11.8343	0.5
September 18th	Cold	Cloudy	17	4	7	240	Lower	Hard	Purple siltstone	1	3	Intermediate	11.6	354	0.91	0	10R 5/1	Reddish grey	22.7	19.4	3.3	20.8	5.7	2.4	21.2	17.8	3.4	1.5	7.07547	1.6	8.98876	-0.1
September 18th	Cold	Cloudy	17	4	7	240	Lower	Soft	Orange limestone	5	21	Thick	12.4	608	0.91	0	2.5Y 8/4	Pale yellow	18.1	15.4	2.7	16.2	1.1	-1.6	17.5	14.6	2.9	0.6	3.42857	0.8	5.47945	-0.2
September 18th	Cold	Cloudy	17	4	7	240	Lower	Hard	Quartzite	3	25	Thin	9.6	584	0.92	0	10YR 6/2	Greyish yellow brown	23.2	18.2	5	19.8	6.2	1.2	20.1	17	3.1	3.1	15.4229	1.2	7.05882	1.9
September 18th	Cold	Cloudy	17	4	7	240	Lower	Soft	Fossiliferous sandstone	4	33	Intermediate	8.6	680	0.91	0	2.5Y 6/4	Dull yellow	21.9	17.9	4	20.1	4.9	0.9	19.1	16	3.1	2.8	14.6597	1.9	11.875	0.9
September 18th	Cold	Cloudy	17	4	7	240	Lower	Hard	Grey siltstone	2	12	Thin	7.5	576	0.94	0	N 6/0	Grey	25.9	21.1	4.8	21.9	8.9	4.1	23.3	18.8	4.5	2.6	11.1588	2.3	12.234	0.3
September 18th	Cold	Cloudy	17	4	7	240	Lower	Soft	Orange limestone	5	20	Thick	11.7	420	0.97	0	10YR 8/3	Light yellow	18.7	16	2.7	16.6	1.7	-1	17.1	14.8	2.3	1.6	9.35673	1.2	8.10811	0.4
September 18th	Cold	Cloudy	17	4	7	240	Lower	Hard	Quartzite	3	29	Thick	14.1	368	0.94	0	10YR 7/2	Greyish yellow brown	19.7	17.9	1.8	18.6	2.7	0.9	18.2	16.3	1.9	1.5	8.24176	1.6	9.81595	-0.1
September 18th	Cold	Cloudy	17	4	7	240	Lower	Soft	White limestone	6	16	Thick	12.3	412	0.94	0	2.5Y 8/1	Light grey	18.3	16.3	2	16.7	1.3	-0.7	17.3	14.9	2.4	1	5.78035	1.4	9.39597	-0.4
September 18th	Cold	Cloudy	17	4	7	240	Lower	Hard	Grey siltstone	2	9	Thick	12.6	532	0.97	0	2.5GY 7/1	Light olive grey	22.9	20	2.9	20.5	5.9	3	20.7	18.1	2.6	2.2	10.628	1.9	10.4972	0.3
September 18th	Cold	Cloudy	17	4	7	240	Lower	Hard	Quartzite	3	30	Thick	14.3	588	0.9	0	10YR 8/1	Light grey	19.7	17	2.7	17.7	2.7	0	18.1	15.8	2.3	1.6	8.83978	1.2	7.59494	0.4
September 18th	Cold	Cloudy	17	4	7	240	Lower	Hard	Purple siltstone	1	4	Thin	6.4	608	0.95	0	10R 6/1	Reddish grey	24.8	20.9	3.9	21.9	7.8	3.9	22.3	19.7	2.6	2.5	11.2108	1.2	6.09137	1.3
September 18th	Cold	Cloudy	17	4	7	240	Lower	Soft	Fossiliferous sandstone	4	36	Thin	7.5	742	0.88	1	2.5Y 7/4	Light yellow	23.7	19.4	4.3	20.3	6.7	2.4	21.3	17.2	4.1	2.4	11.2676	2.2	12.7907	0.2
September 18th	Cold	Cloudy	17	4	7	240	Lower	Soft	Fossiliferous sandstone	4	31	Thin	6.9	580	0.94	0	2.5Y 7/6	Yellowish brown	23.1	18.8	4.3	19.6	6.1	1.8	21	17.3	3.7	2.1	10	1.5	8.67052	0.6
September 18th	Cold	Cloudy	17	4	7	240	Lower	Soft	White limestone	6	15	Thin	5.9	564	0.92	2	2.5Y 8/1	Light grey	22.2	17.2	5	18.2	5.2	0.2	20.5	16.5	4	1.7	8.29268	0.7	4.24242	1
September 18th	Cold	Cloudy	17	4	7	240	Lower	Soft	Orange limestone	5	22	Intermediate	7.6	584	0.94	0	2.5Y 7/4	Light yellow	23.3	18.5	4.8	19.4	6.3	1.5	20.8	16.9	3.9	2.5	12.0192	1.6	9.46746	0.9
September 18th	Cold	Cloudy	17	4	7	240	Lower	Hard	Grey siltstone	2	7	Thick	12.3	544	0.95	0	N 7/0	Greyish white	24.1	20.4	3.7	21.3	7.1	3.4	21.2	18.5	2.7	2.9	13.6792	1.9	10.2703	1
September 18th	Cold	Cloudy	17	4	7	240	Lower	Soft	Orange limestone	5	23	Thin	6.1	792	0.94	0	5Y 8/3	Pale yellow	21.9	18.2	3.7	19	4.9	1.2	20.1	16.9	3.2	1.8	8.95522	1.3	7.69231	0.5
September 18th	Cold	Cloudy	17	4	7	240	Lower	Hard	Purple siltstone	1	2	Thick	14.3	456	0.94	0	7.5YR 5/1	Brownish grey	23.2	20.3	2.9	21.3	6.2	3.3	21.7	18.3	3.4	1.5	6.91244	2	10.929	-0.5
September 18th	Cold	Cloudy	17	4	7	240	Lower	Soft	White limestone	6	13	Intermediate	9.4	492	0.91	2	2.5Y 8/1	Light grey	20.2	17.4	2.8	19.4	3.2	0.4	18.6	15.8	2.8	1.6	8.60215	1.6	10.1266	0
September 18th	Cold	Cloudy	17	4	7	240	Lower	Hard	Grey siltstone	2	11	Thin	7.3	696	0.92	0	N 7/0	Greyish white	25.7	21.2	4.5	21.9	8.7	4.2	23.1	19.4	3.7	2.6	11.2554	1.8	9.27835	0.8
September 18th	Cold	Cloudy	17	4	7	240	Lower	Hard	Purple siltstone	1	1	Intermediate	11.2	408	0.94	0	2.5YR 5/1	Reddish grey	26.6	22.2	4.4	23	9.6	5.2	23.8	20.3	3.5	2.8	11.7647	1.9	9.35961	0.9
September 18th	Cold	Cloudy	17	4	7	240	Lower	Hard	Grey siltstone	2	10	Intermediate	8.4	556	0.94	0	2.5GY 7/1	Light olive grey	25.1	21.3	3.8	21.8	8.1	4.3	22.2	18.9	3.3	2.9	13.0631	2.4	12.6984	0.5
September 18th	Cold	Cloudy	17	4	7	240	Lower	Soft	Orange limestone	5	19	Intermediate	6.8	528	0.92	0	2.5Y 6/4	Dull yellow	22.9	19.2	3.7	19.8	5.9	2.2	20.8	17.7	3.1	2.1	10.0962	1.5	8.47458	0.6
September 18th	Cold	Cloudy	17	4	7	240	Lower	Soft	White limestone	6	14	Thin	6.5	816	0.95	2	2.5Y 8/1	Light grey	22	17.3	4.7	18.3	5	0.3	19.7	16.5	3.2	2.3	11.6751	0.8	4.84848	1.5
September 18th	Cold	Cloudy	17	4	7	240	Lower	Soft	Fossiliferous sandstone	4	35	Thick	15	664	0.91	1	2.5Y 5/6	Yellowish brown	23.1	17.7	5.4	19.8	6.1	0.7	20.3	16.3	4	2.8	13.7931	1.4	8.58896	1.4
September 18th	Cold	Cloudy	17	4	7	240	Lower	Hard	Purple siltstone	1	5	Thin	6.5	496	0.97	0	10R 6/1	Reddish grey	25.5	22.8	2.7	23.5	8.5	5.8	23.9	20.6	3.3	1.6	6.69456	2.2	10.6796	-0.6
September 18th	Cold	Cloudy	17	4	7	240	Lower	Hard	Quartzite	3	28	Intermediate	12.6	464	0.92	0	10YR 8/1	Light grey	20.8	17.4	3.4	19.1	3.8	0.4	19.4	16.8	2.6	1.4	7.21649	0.6	3.57143	0.8
September 18th	Cold	Cloudy	17	4	7	240	Lower	Soft	Orange limestone	5	24	Thin	6	588	0.94	1	2.5Y 7/4	Light yellow	22.5	18.4	4.1	19.4	5.5	1.4	20.8	17	3.8	1.7	8.17308	1.4	8.23529	0.3
September 18th	Cold	Cloudy	17	4	7	240	Lower	Hard	Quartzite	3	27	Intermediate	11.1	448	0.94	0	10YR 8/1	Light grey	20.4	16.9	3.5	18.5	3.4	-0.1	19.3	16	3.3	1.1	5.69948	0.9	5.625	0.2
September 18th	Cold	Cloudy	17	4	7	240	Lower	Soft	White limestone	6	18	Thick	12	504	0.81	0	2.5Y 8/1	Light grey	19.2	16.1	3.1	16.6	2.2	-0.9	18.6	15.2	3.4	0.6	3.22581	0.9	5.92105	-0.3
September 18th	Cold	Cloudy	17	4	7	240	Lower	Soft	Fossiliferous sandstone	4	34	Thick	13.9	520	0.95	0	2.5Y 7/4	Light yellow	21.1	17.9	3.2	19.7	4.1	0.9	20.6	16.6	4	0.5	2.42718	1.3	7.83133	-0.8
September 18th	Cold	Cloudy	17	4	7	240	Lower	Hard	Purple siltstone	1	6	Thick	13.5	516	1	0	7.5R 5/1	Reddish grey	24.4	20.7	3.7	21.2	7.4	3.7	22.5	20.1	2.4	1.9	8.44444	0.6	2.98507	1.3
September 18th	Cold	Cloudy	17	4	7	240	Lower	Hard	Quartzite	3	26	Thin	7.9	496	0.94	0	10YR 7/2	Greyish yellow brown	22.6	19.6	3	22.1	5.6	2.6	21	19.2	1.8	1.6	7.61905	0.4	2.08333	1.2
September 18th	Cold	Cloudy	17	4	7	240	Lower	Soft	White limestone	6	17	Intermediate	9.5	448	0.92	1	2.5Y 8/1	Light grey	19	16.9	2.1	18.5	2	-0.1	18.6	16.1	2.5	0.4	2.15054	0.8	4.96894	-0.4
September 18th	Cold	Cloudy	17	4	7	240	Lower	Hard	Grey siltstone	2	8	Intermediate	8.1	584	0.97	0	2.5GY 6/1	Olive grey	23.9	19.9	4	21.9	6.9	2.9	21.8	19.3	2.5	2.1	9.63303	0.6	3.10881	1.5
September 18th	Cold	Cloudy	17	4	7	240	Lower	Soft	Fossiliferous sandstone	4	32	Intermediate	7.9	536	0.91	0	2.5Y 7/4	Light yellow	21.7	18.5	3.2	20.5	4.7	1.5	19.9	17.1	2.8	1.8	9.04523	1.4	8.18713	0.4
September 18th	Cold	Cloudy	17	4	7	300	Upper	Hard	Purple siltstone	1	3	Intermediate	11.6	424	0.91	0	10R 5/1	Reddish grey	27	21.4	5.6	25.5	10	4.4	26.7	22.2	4.5	0.3	1.1236	-0.8	-3.6036	1.1
September 18th	Cold	Cloudy	17	4	7	300	Upper	Soft	Orange limestone	5	21	Thick	12.4	676	0.88	1	2.5Y 8/4	Pale yellow	21.8	16.8	5	19.9	4.8	-0.2	21.9	18.1	3.8	-0.1	-0.456621	-1.3	-7.18232	1.2
September 18th	Cold	Cloudy	17	4	7	300	Upper	Hard	Quartzite	3	25	Thin	9.6	636	0.87	0	10YR 6/2	Greyish yellow brown	22.3	17.9	4.4	19.6	5.3	0.9	23.4	20.7	2.7	-1.1	-4.70085	-2.8	-13.5266	1.7
September 18th	Cold	Cloudy	17	4	7	300	Upper	Soft	Fossiliferous sandstone	4	33	Intermediate	8.6	672	0.85	0	2.5Y 6/4	Dull yellow	23.3	18.4	4.9	22.4	6.3	1.4	23.3	19.7	3.6	0	0	-1.3	-6.59898	1.3
September 18th	Cold	Cloudy	17	4	7	300	Upper	Hard	Grey siltstone	2	12	Thin	7.5	580	0.95	0	N 6/0	Grey	26.1	21.2	4.9	23.7	9.1	4.2	26.1	22.9	3.2	0	0	-1.7	-7.42358	1.7
September 18th	Cold	Cloudy	17	4	7	300	Upper	Soft	Orange limestone	5	20	Thick	11.7	356	0.92	0	10YR 8/3	Light yellow	21.4	16.7	4.7	19	4.4	-0.3	21.6	18.3	3.3	-0.2	-0.925926	-1.6	-8.74317	1.4
September 18th	Cold	Cloudy	17	4	7	300	Upper	Hard	Quartzite	3	29	Thick	14.1	400	0.94	1	10YR 7/2	Greyish yellow brown	20.8	16.8	4	19.6	3.8	-0.2	21	18.9	2.1	-0.2	-0.952381	-2.1	-11.1111	1.9
September 18th	Cold	Cloudy	17	4	7	300	Upper	Soft	White limestone	6	16	Thick	12.3	460	0.94	1	2.5Y 8/1	Light grey	20.6	17.1	3.5	18.9	3.6	0.1	20.2	17.1	3.1	0.4	1.9802	0	0	0.4
September 18th	Cold	Cloudy	17	4	7	300	Upper	Hard	Grey siltstone	2	9	Thick	12.6	624	0.92	0	2.5GY 7/1	Light olive grey	25.5	20.5	5	23.6	8.5	3.5	24.8	21.6	3.2	0.7	2.82258	-1.1	-5.09259	1.8
September 18th	Cold	Cloudy	17	4	7	300	Upper	Hard	Quartzite	3	30	Thick	14.3	376	0.96	0	10YR 8/1	Light grey	20.2	15.3	4.9	18.1	3.2	-1.7	20.6	16.6	4	-0.4	-1.94175	-1.3	-7.83133	0.9
September 18th	Cold	Cloudy	17	4	7	300	Upper	Hard	Purple siltstone	1	4	Thin	6.4	608	0.94	0	10R 6/1	Reddish grey	24.3	19.2	5.1	22.1	7.3	2.2	23.8	20.2	3.6	0.5	2.10084	-1	-4.9505	1.5
September 18th	Cold	Cloudy	17	4	7	300	Upper	Soft	Fossiliferous sandstone	4	36	Thin	7.5	732	0.86	0	2.5Y 7/4	Light yellow	24.2	19.3	4.9	21.1	7.2	2.3	23.1	20.1	3	1.1	4.7619	-0.8	-3.9801	1.9
September 18th	Cold	Cloudy	17	4	7	300	Upper	Soft	Fossiliferous sandstone	4	31	Thin	6.9	588	0.94	0	2.5Y 7/6	Yellowish brown	25.4	19.2	6.2	22.8	8.4	2.2	23	19.2	3.8	2.4	10.4348	0	0	2.4
September 18th	Cold	Cloudy	17	4	7	300	Upper	Soft	White limestone	6	15	Thin	5.9	612	0.82	1	2.5Y 8/1	Light grey	22.5	16.6	5.9	19.9	5.5	-0.4	21.3	17.4	3.9	1.2	5.6338	-0.8	-4.5977	2
September 18th	Cold	Cloudy	17	4	7	300	Upper	Soft	Orange limestone	5	22	Intermediate	7.6	632	0.94	0	2.5Y 7/4	Light yellow	24.5	18.7	5.8	22.5	7.5	1.7	22.5	19.8	2.7	2	8.88889	-1.1	-5.55556	3.1
September 18th	Cold	Cloudy	17	4	7	300	Upper	Hard	Grey siltstone	2	7	Thick	12.3	436	0.94	0	N 7/0	Greyish white	26.2	20.1	6.1	24	9.2	3.1	24.6	20.8	3.8	1.6	6.50407	-0.7	-3.36538	2.3
September 18th	Cold	Cloudy	17	4	7	300	Upper	Soft	Orange limestone	5	23	Thin	6.1	808	0.91	0	5Y 8/3	Pale yellow	22.4	18.3	4.1	20.4	5.4	1.3	21.2	18	3.2	1.2	5.66038	0.3	1.66667	0.9
September 18th	Cold	Cloudy	17	4	7	300	Upper	Hard	Purple siltstone	1	2	Thick	14.3	484	0.97	0	7.5YR 5/1	Brownish grey	27.4	21.2	6.2	24.3	10.4	4.2	25.5	22	3.5	1.9	7.45098	-0.8	-3.63636	2.7
September 18th	Cold	Cloudy	17	4	7	300	Upper	Soft	White limestone	6	13	Intermediate	9.4	592	0.91	2	2.5Y 8/1	Light grey	21.5	16.6	4.9	19.4	4.5	-0.4	20.3	17.4	2.9	1.2	5.91133	-0.8	-4.5977	2
September 18th	Cold	Cloudy	17	4	7	300	Upper	Hard	Grey siltstone	2	11	Thin	7.3	688	0.94	0	N 7/0	Greyish white	26.6	20.3	6.3	23.7	9.6	3.3	25.6	21.5	4.1	1	3.90625	-1.2	-5.5814	2.2
September 18th	Cold	Cloudy	17	4	7	300	Upper	Hard	Purple siltstone	1	1	Intermediate	11.2	384	0.92	0	2.5YR 5/1	Reddish grey	27.6	21.2	6.4	24.9	10.6	4.2	25.7	22.1	3.6	1.9	7.393	-0.9	-4.0724	2.8
September 18th	Cold	Cloudy	17	4	7	300	Upper	Hard	Grey siltstone	2	10	Intermediate	8.4	552	0.94	0	2.5GY 7/1	Light olive grey	25.5	19.4	6.1	22.8	8.5	2.4	23.6	19.6	4	1.9	8.05085	-0.2	-1.02041	2.1
September 18th	Cold	Cloudy	17	4	7	300	Upper	Soft	Orange limestone	5	19	Intermediate	6.8	604	0.94	0	2.5Y 6/4	Dull yellow	24.3	19.3	5	21.7	7.3	2.3	22.3	19.4	2.9	2	8.96861	-0.1	-0.515464	2.1
September 18th	Cold	Cloudy	17	4	7	300	Upper	Soft	White limestone	6	14	Thin	6.5	830	0.97	4	2.5Y 8/1	Light grey	23.1	17.8	5.3	21.3	6.1	0.8	21.3	17.9	3.4	1.8	8.4507	-0.1	-0.558659	1.9
September 18th	Cold	Cloudy	17	4	7	300	Upper	Soft	Fossiliferous sandstone	4	35	Thick	15	704	0.91	0	2.5Y 5/6	Yellowish brown	25.9	20.7	5.2	24.2	8.9	3.7	24.2	20.8	3.4	1.7	7.02479	-0.1	-0.480769	1.8
September 18th	Cold	Cloudy	17	4	7	300	Upper	Hard	Purple siltstone	1	5	Thin	6.5	508	0.92	0	10R 6/1	Reddish grey	26.7	19.6	7.1	25.3	9.7	2.6	25.7	20.9	4.8	1	3.89105	-1.3	-6.2201	2.3
September 18th	Cold	Cloudy	17	4	7	300	Upper	Hard	Quartzite	3	28	Intermediate	12.6	328	0.95	0	10YR 8/1	Light grey	19.5	14.8	4.7	16.2	2.5	-2.2	18.4	15.8	2.6	1.1	5.97826	-1	-6.32911	2.1
September 18th	Cold	Cloudy	17	4	7	300	Upper	Soft	Orange limestone	5	24	Thin	6	620	0.94	0	2.5Y 7/4	Light yellow	23.5	18.5	5	20.6	6.5	1.5	21.9	18.3	3.6	1.6	7.30594	0.2	1.0929	1.4
September 18th	Cold	Cloudy	17	4	7	300	Upper	Hard	Quartzite	3	27	Intermediate	11.1	444	0.94	0	10YR 8/1	Light grey	18.1	15.2	2.9	16.7	1.1	-1.8	18.4	16.1	2.3	-0.3	-1.63043	-0.9	-5.59006	0.6
September 18th	Cold	Cloudy	17	4	7	300	Upper	Soft	White limestone	6	18	Thick	12	544	0.85	1	2.5Y 8/1	Light grey	21	17.2	3.8	18.3	4	0.2	20.5	17	3.5	0.5	2.43902	0.2	1.17647	0.3
September 18th	Cold	Cloudy	17	4	7	300	Upper	Soft	Fossiliferous sandstone	4	34	Thick	13.9	436	0.76	0	2.5Y 7/4	Light yellow	25	18.8	6.2	22.2	8	1.8	23.4	19.3	4.1	1.6	6.83761	-0.5	-2.59067	2.1
September 18th	Cold	Cloudy	17	4	7	300	Upper	Hard	Purple siltstone	1	6	Thick	13.5	596	0.94	0	7.5R 5/1	Reddish grey	27.1	20.8	6.3	24.6	10.1	3.8	26.2	22	4.2	0.9	3.43511	-1.2	-5.45455	2.1
September 18th	Cold	Cloudy	17	4	7	300	Upper	Hard	Quartzite	3	26	Thin	7.9	500	0.97	0	10YR 7/2	Greyish yellow brown	22.2	17.1	5.1	18.4	5.2	0.1	22	18.6	3.4	0.2	0.909091	-1.5	-8.06452	1.7
September 18th	Cold	Cloudy	17	4	7	300	Upper	Soft	White limestone	6	17	Intermediate	9.5	444	0.95	0	2.5Y 8/1	Light grey	20.6	16	4.6	18.2	3.6	-1	19.8	16.8	3	0.8	4.0404	-0.8	-4.7619	1.6
September 18th	Cold	Cloudy	17	4	7	300	Upper	Hard	Grey siltstone	2	8	Intermediate	8.1	592	0.97	0	2.5GY 6/1	Olive grey	24.6	18.9	5.7	22.1	7.6	1.9	24.3	19.6	4.7	0.3	1.23457	-0.7	-3.57143	1
September 18th	Cold	Cloudy	17	4	7	300	Upper	Soft	Fossiliferous sandstone	4	32	Intermediate	7.9	524	0.92	0	2.5Y 7/4	Light yellow	22.6	18	4.6	20.7	5.6	1	21.8	18.9	2.9	0.8	3.66972	-0.9	-4.7619	1.7
September 18th	Cold	Cloudy	17	4	7	300	Lower	Hard	Purple siltstone	1	3	Intermediate	11.6	354	0.91	0	10R 5/1	Reddish grey	22.5	17.1	5.4	18.9	5.5	0.1	22.7	19.4	3.3	-0.2	-0.881057	-2.3	-11.8557	2.1
September 18th	Cold	Cloudy	17	4	7	300	Lower	Soft	Orange limestone	5	21	Thick	12.4	608	0.91	0	2.5Y 8/4	Pale yellow	17.2	13.6	3.6	14.8	0.2	-3.4	18.1	15.4	2.7	-0.9	-4.97238	-1.8	-11.6883	0.9
September 18th	Cold	Cloudy	17	4	7	300	Lower	Hard	Quartzite	3	25	Thin	9.6	584	0.92	0	10YR 6/2	Greyish yellow brown	21.5	14	7.5	17.2	4.5	-3	23.2	18.2	5	-1.7	-7.32759	-4.2	-23.0769	2.5
September 18th	Cold	Cloudy	17	4	7	300	Lower	Soft	Fossiliferous sandstone	4	33	Intermediate	8.6	680	0.91	0	2.5Y 6/4	Dull yellow	20.5	15.7	4.8	18.8	3.5	-1.3	21.9	17.9	4	-1.4	-6.39269	-2.2	-12.2905	0.8
September 18th	Cold	Cloudy	17	4	7	300	Lower	Hard	Grey siltstone	2	12	Thin	7.5	576	0.94	0	N 6/0	Grey	25.2	19.9	5.3	20.6	8.2	2.9	25.9	21.1	4.8	-0.7	-2.7027	-1.2	-5.6872	0.5
September 18th	Cold	Cloudy	17	4	7	300	Lower	Soft	Orange limestone	5	20	Thick	11.7	420	0.97	0	10YR 8/3	Light yellow	18.2	15.3	2.9	16.5	1.2	-1.7	18.7	16	2.7	-0.5	-2.6738	-0.7	-4.375	0.2
September 18th	Cold	Cloudy	17	4	7	300	Lower	Hard	Quartzite	3	29	Thick	14.1	368	0.94	0	10YR 7/2	Greyish yellow brown	19.3	15.8	3.5	16.8	2.3	-1.2	19.7	17.9	1.8	-0.4	-2.03046	-2.1	-11.7318	1.7
September 18th	Cold	Cloudy	17	4	7	300	Lower	Soft	White limestone	6	16	Thick	12.3	412	0.94	0	2.5Y 8/1	Light grey	18.2	15.5	2.7	16.4	1.2	-1.5	18.3	16.3	2	-0.1	-0.546448	-0.8	-4.90798	0.7
September 18th	Cold	Cloudy	17	4	7	300	Lower	Hard	Grey siltstone	2	9	Thick	12.6	532	0.97	0	2.5GY 7/1	Light olive grey	22.7	19.6	3.1	20.9	5.7	2.6	22.9	20	2.9	-0.2	-0.873362	-0.4	-2	0.2
September 18th	Cold	Cloudy	17	4	7	300	Lower	Hard	Quartzite	3	30	Thick	14.3	588	0.9	0	10YR 8/1	Light grey	19.1	15.7	3.4	17.2	2.1	-1.3	19.7	17	2.7	-0.6	-3.04569	-1.3	-7.64706	0.7
September 18th	Cold	Cloudy	17	4	7	300	Lower	Hard	Purple siltstone	1	4	Thin	6.4	608	0.95	0	10R 6/1	Reddish grey	24.8	19.7	5.1	21.3	7.8	2.7	24.8	20.9	3.9	0	0	-1.2	-5.74163	1.2
September 18th	Cold	Cloudy	17	4	7	300	Lower	Soft	Fossiliferous sandstone	4	36	Thin	7.5	742	0.88	1	2.5Y 7/4	Light yellow	24.6	19.6	5	20.4	7.6	2.6	23.7	19.4	4.3	0.9	3.79747	0.2	1.03093	0.7
September 18th	Cold	Cloudy	17	4	7	300	Lower	Soft	Fossiliferous sandstone	4	31	Thin	6.9	580	0.94	0	2.5Y 7/6	Yellowish brown	24.6	18.3	6.3	20.8	7.6	1.3	23.1	18.8	4.3	1.5	6.49351	-0.5	-2.65957	2
September 18th	Cold	Cloudy	17	4	7	300	Lower	Soft	White limestone	6	15	Thin	5.9	564	0.92	2	2.5Y 8/1	Light grey	24.3	17.1	7.2	18.7	7.3	0.1	22.2	17.2	5	2.1	9.45946	-0.1	-0.581395	2.2
September 18th	Cold	Cloudy	17	4	7	300	Lower	Soft	Orange limestone	5	22	Intermediate	7.6	584	0.94	0	2.5Y 7/4	Light yellow	24.8	18.8	6	19.8	7.8	1.8	23.3	18.5	4.8	1.5	6.43777	0.3	1.62162	1.2
September 18th	Cold	Cloudy	17	4	7	300	Lower	Hard	Grey siltstone	2	7	Thick	12.3	544	0.95	0	N 7/0	Greyish white	23.4	20.3	3.1	21.3	6.4	3.3	24.1	20.4	3.7	-0.7	-2.90456	-0.1	-0.490196	-0.6
September 18th	Cold	Cloudy	17	4	7	300	Lower	Soft	Orange limestone	5	23	Thin	6.1	792	0.94	0	5Y 8/3	Pale yellow	23.1	18.8	4.3	19.2	6.1	1.8	21.9	18.2	3.7	1.2	5.47945	0.6	3.2967	0.6
September 18th	Cold	Cloudy	17	4	7	300	Lower	Hard	Purple siltstone	1	2	Thick	14.3	456	0.94	0	7.5YR 5/1	Brownish grey	24	19.5	4.5	21.7	7	2.5	23.2	20.3	2.9	0.8	3.44828	-0.8	-3.94089	1.6
September 18th	Cold	Cloudy	17	4	7	300	Lower	Soft	White limestone	6	13	Intermediate	9.4	492	0.91	2	2.5Y 8/1	Light grey	20.5	16.4	4.1	18.9	3.5	-0.6	20.2	17.4	2.8	0.3	1.48515	-1	-5.74713	1.3
September 18th	Cold	Cloudy	17	4	7	300	Lower	Hard	Grey siltstone	2	11	Thin	7.3	696	0.92	0	N 7/0	Greyish white	25.7	20.8	4.9	21.5	8.7	3.8	25.7	21.2	4.5	0	0	-0.4	-1.88679	0.4
September 18th	Cold	Cloudy	17	4	7	300	Lower	Hard	Purple siltstone	1	1	Intermediate	11.2	408	0.94	0	2.5YR 5/1	Reddish grey	27.1	21.4	5.7	22.7	10.1	4.4	26.6	22.2	4.4	0.5	1.8797	-0.8	-3.6036	1.3
September 18th	Cold	Cloudy	17	4	7	300	Lower	Hard	Grey siltstone	2	10	Intermediate	8.4	556	0.94	0	2.5GY 7/1	Light olive grey	25.5	19.9	5.6	21.2	8.5	2.9	25.1	21.3	3.8	0.4	1.59363	-1.4	-6.57277	1.8
September 18th	Cold	Cloudy	17	4	7	300	Lower	Soft	Orange limestone	5	19	Intermediate	6.8	528	0.92	0	2.5Y 6/4	Dull yellow	23.2	18.9	4.3	20	6.2	1.9	22.9	19.2	3.7	0.3	1.31004	-0.3	-1.5625	0.6
September 18th	Cold	Cloudy	17	4	7	300	Lower	Soft	White limestone	6	14	Thin	6.5	816	0.95	2	2.5Y 8/1	Light grey	22.6	17.2	5.4	18.3	5.6	0.2	22	17.3	4.7	0.6	2.72727	-0.1	-0.578035	0.7
September 18th	Cold	Cloudy	17	4	7	300	Lower	Soft	Fossiliferous sandstone	4	35	Thick	15	664	0.91	1	2.5Y 5/6	Yellowish brown	23.9	17.9	6	19.8	6.9	0.9	23.1	17.7	5.4	0.8	3.4632	0.2	1.12994	0.6
September 18th	Cold	Cloudy	17	4	7	300	Lower	Hard	Purple siltstone	1	5	Thin	6.5	496	0.97	0	10R 6/1	Reddish grey	26.1	22.6	3.5	23.5	9.1	5.6	25.5	22.8	2.7	0.6	2.35294	-0.2	-0.877193	0.8
September 18th	Cold	Cloudy	17	4	7	300	Lower	Hard	Quartzite	3	28	Intermediate	12.6	464	0.92	0	10YR 8/1	Light grey	19.8	15.7	4.1	18.1	2.8	-1.3	20.8	17.4	3.4	-1	-4.80769	-1.7	-9.77011	0.7
September 18th	Cold	Cloudy	17	4	7	300	Lower	Soft	Orange limestone	5	24	Thin	6	588	0.94	1	2.5Y 7/4	Light yellow	22.5	18.5	4	19.8	5.5	1.5	22.5	18.4	4.1	0	0	0.1	0.543478	-0.1
September 18th	Cold	Cloudy	17	4	7	300	Lower	Hard	Quartzite	3	27	Intermediate	11.1	448	0.94	0	10YR 8/1	Light grey	20.6	16.2	4.4	19	3.6	-0.8	20.4	16.9	3.5	0.2	0.980392	-0.7	-4.14201	0.9
September 18th	Cold	Cloudy	17	4	7	300	Lower	Soft	White limestone	6	18	Thick	12	504	0.81	0	2.5Y 8/1	Light grey	19	16	3	16.8	2	-1	19.2	16.1	3.1	-0.2	-1.04167	-0.1	-0.621118	-0.1
September 18th	Cold	Cloudy	17	4	7	300	Lower	Soft	Fossiliferous sandstone	4	34	Thick	13.9	520	0.95	0	2.5Y 7/4	Light yellow	23.6	17.8	5.8	19.8	6.6	0.8	21.1	17.9	3.2	2.5	11.8483	-0.1	-0.558659	2.6
September 18th	Cold	Cloudy	17	4	7	300	Lower	Hard	Purple siltstone	1	6	Thick	13.5	516	1	0	7.5R 5/1	Reddish grey	24.3	20.2	4.1	21.2	7.3	3.2	24.4	20.7	3.7	-0.1	-0.409836	-0.5	-2.41546	0.4
September 18th	Cold	Cloudy	17	4	7	300	Lower	Hard	Quartzite	3	26	Thin	7.9	496	0.94	0	10YR 7/2	Greyish yellow brown	23	19.3	3.7	21.8	6	2.3	22.6	19.6	3	0.4	1.76991	-0.3	-1.53061	0.7
September 18th	Cold	Cloudy	17	4	7	300	Lower	Soft	White limestone	6	17	Intermediate	9.5	448	0.92	1	2.5Y 8/1	Light grey	20.2	16.9	3.3	18.6	3.2	-0.1	19	16.9	2.1	1.2	6.31579	0	0	1.2
September 18th	Cold	Cloudy	17	4	7	300	Lower	Hard	Grey siltstone	2	8	Intermediate	8.1	584	0.97	0	2.5GY 6/1	Olive grey	23.7	19.9	3.8	21.5	6.7	2.9	23.9	19.9	4	-0.2	-0.83682	0	0	-0.2
September 18th	Cold	Cloudy	17	4	7	300	Lower	Soft	Fossiliferous sandstone	4	32	Intermediate	7.9	536	0.91	0	2.5Y 7/4	Light yellow	22.1	18.2	3.9	20.2	5.1	1.2	21.7	18.5	3.2	0.4	1.84332	-0.3	-1.62162	0.7
October 2nd	Warm	Warm	18	9	0	0	Upper	Hard	Purple siltstone	1	3	Intermediate	11.6	424	0.91	0	10R 5/1	Reddish grey	24.8	17.1	7.7	19.5	6.8	-0.9
October 2nd	Warm	Warm	18	9	0	0	Upper	Soft	Orange limestone	5	21	Thick	12.4	676	0.88	1	2.5Y 8/4	Pale yellow	22.3	15.4	6.9	18.7	4.3	-2.6
October 2nd	Warm	Warm	18	9	0	0	Upper	Hard	Quartzite	3	25	Thin	9.6	636	0.87	0	10YR 6/2	Greyish yellow brown	20	14.3	5.7	17.6	2	-3.7
October 2nd	Warm	Warm	18	9	0	0	Upper	Soft	Fossiliferous sandstone	4	33	Intermediate	8.6	672	0.85	0	2.5Y 6/4	Dull yellow	22	16.6	5.4	18	4	-1.4
October 2nd	Warm	Warm	18	9	0	0	Upper	Hard	Grey siltstone	2	12	Thin	7.5	580	0.95	0	N 6/0	Grey	21.8	18.5	3.3	19.7	3.8	0.5
October 2nd	Warm	Warm	18	9	0	0	Upper	Soft	Orange limestone	5	20	Thick	11.7	356	0.92	0	10YR 8/3	Light yellow	22.4	17	5.4	19.9	4.4	-1
October 2nd	Warm	Warm	18	9	0	0	Upper	Hard	Quartzite	3	29	Thick	14.1	400	0.94	1	10YR 7/2	Greyish yellow brown	20.1	15.5	4.6	17.7	2.1	-2.5
October 2nd	Warm	Warm	18	9	0	0	Upper	Soft	White limestone	6	16	Thick	12.3	460	0.94	1	2.5Y 8/1	Light grey	21.7	16	5.7	18.4	3.7	-2
October 2nd	Warm	Warm	18	9	0	0	Upper	Hard	Grey siltstone	2	9	Thick	12.6	624	0.92	0	2.5GY 7/1	Light olive grey	22.3	15.3	7	19	4.3	-2.7
October 2nd	Warm	Warm	18	9	0	0	Upper	Hard	Quartzite	3	30	Thick	14.3	376	0.96	0	10YR 8/1	Light grey	19	13.8	5.2	15.8	1	-4.2
October 2nd	Warm	Warm	18	9	0	0	Upper	Hard	Purple siltstone	1	4	Thin	6.4	608	0.94	0	10R 6/1	Reddish grey	18.9	15.2	3.7	17.1	0.9	-2.8
October 2nd	Warm	Warm	18	9	0	0	Upper	Soft	Fossiliferous sandstone	4	36	Thin	7.5	732	0.86	0	2.5Y 7/4	Light yellow	20.7	14.5	6.2	17.5	2.7	-3.5
October 2nd	Warm	Warm	18	9	0	0	Upper	Soft	Fossiliferous sandstone	4	31	Thin	6.9	588	0.94	0	2.5Y 7/6	Yellowish brown	20.9	16	4.9	18.5	2.9	-2
October 2nd	Warm	Warm	18	9	0	0	Upper	Soft	White limestone	6	15	Thin	5.9	612	0.82	1	2.5Y 8/1	Light grey	19.1	15.3	3.8	18	1.1	-2.7
October 2nd	Warm	Warm	18	9	0	0	Upper	Soft	Orange limestone	5	22	Intermediate	7.6	632	0.94	0	2.5Y 7/4	Light yellow	22	15.8	6.2	19.5	4	-2.2
October 2nd	Warm	Warm	18	9	0	0	Upper	Hard	Grey siltstone	2	7	Thick	12.3	436	0.94	0	N 7/0	Greyish white	22.4	14.8	7.6	17.1	4.4	-3.2
October 2nd	Warm	Warm	18	9	0	0	Upper	Soft	Orange limestone	5	23	Thin	6.1	808	0.91	0	5Y 8/3	Pale yellow	21.9	16.7	5.2	18.6	3.9	-1.3
October 2nd	Warm	Warm	18	9	0	0	Upper	Hard	Purple siltstone	1	2	Thick	14.3	484	0.97	0	7.5YR 5/1	Brownish grey	23.7	16	7.7	20.1	5.7	-2
October 2nd	Warm	Warm	18	9	0	0	Upper	Soft	White limestone	6	13	Intermediate	9.4	592	0.91	2	2.5Y 8/1	Light grey	22.4	16.5	5.9	20.9	4.4	-1.5
October 2nd	Warm	Warm	18	9	0	0	Upper	Hard	Grey siltstone	2	11	Thin	7.3	688	0.94	0	N 7/0	Greyish white	22.3	17.6	4.7	19.5	4.3	-0.4
October 2nd	Warm	Warm	18	9	0	0	Upper	Hard	Purple siltstone	1	1	Intermediate	11.2	384	0.92	0	2.5YR 5/1	Reddish grey	22.8	16.7	6.1	19.9	4.8	-1.3
October 2nd	Warm	Warm	18	9	0	0	Upper	Hard	Grey siltstone	2	10	Intermediate	8.4	552	0.94	0	2.5GY 7/1	Light olive grey	20.5	16.3	4.2	18.7	2.5	-1.7
October 2nd	Warm	Warm	18	9	0	0	Upper	Soft	Orange limestone	5	19	Intermediate	6.8	604	0.94	0	2.5Y 6/4	Dull yellow	22.8	16.7	6.1	18.9	4.8	-1.3
October 2nd	Warm	Warm	18	9	0	0	Upper	Soft	White limestone	6	14	Thin	6.5	830	0.97	4	2.5Y 8/1	Light grey	22.1	15.2	6.9	18.2	4.1	-2.8
October 2nd	Warm	Warm	18	9	0	0	Upper	Soft	Fossiliferous sandstone	4	35	Thick	15	704	0.91	0	2.5Y 5/6	Yellowish brown	25.1	16.6	8.5	18.9	7.1	-1.4
October 2nd	Warm	Warm	18	9	0	0	Upper	Hard	Purple siltstone	1	5	Thin	6.5	508	0.92	0	10R 6/1	Reddish grey	22.9	17.1	5.8	20.9	4.9	-0.9
October 2nd	Warm	Warm	18	9	0	0	Upper	Hard	Quartzite	3	28	Intermediate	12.6	328	0.95	0	10YR 8/1	Light grey	19	14.7	4.3	16.1	1	-3.3
October 2nd	Warm	Warm	18	9	0	0	Upper	Soft	Orange limestone	5	24	Thin	6	620	0.94	0	2.5Y 7/4	Light yellow	23.3	17.4	5.9	19.4	5.3	-0.6
October 2nd	Warm	Warm	18	9	0	0	Upper	Hard	Quartzite	3	27	Intermediate	11.1	444	0.94	0	10YR 8/1	Light grey	19.1	15.5	3.6	16.8	1.1	-2.5
October 2nd	Warm	Warm	18	9	0	0	Upper	Soft	White limestone	6	18	Thick	12	544	0.85	1	2.5Y 8/1	Light grey	21.9	16	5.9	18.9	3.9	-2
October 2nd	Warm	Warm	18	9	0	0	Upper	Soft	Fossiliferous sandstone	4	34	Thick	13.9	436	0.76	0	2.5Y 7/4	Light yellow	21.3	15.8	5.5	18.4	3.3	-2.2
October 2nd	Warm	Warm	18	9	0	0	Upper	Hard	Purple siltstone	1	6	Thick	13.5	596	0.94	0	7.5R 5/1	Reddish grey	22.4	16.3	6.1	19	4.4	-1.7
October 2nd	Warm	Warm	18	9	0	0	Upper	Hard	Quartzite	3	26	Thin	7.9	500	0.97	0	10YR 7/2	Greyish yellow brown	20.2	16.4	3.8	19.1	2.2	-1.6
October 2nd	Warm	Warm	18	9	0	0	Upper	Soft	White limestone	6	17	Intermediate	9.5	444	0.95	0	2.5Y 8/1	Light grey	21.3	15.3	6	20.3	3.3	-2.7
October 2nd	Warm	Warm	18	9	0	0	Upper	Hard	Grey siltstone	2	8	Intermediate	8.1	592	0.97	0	2.5GY 6/1	Olive grey	23.6	16.9	6.7	19.8	5.6	-1.1
October 2nd	Warm	Warm	18	9	0	0	Upper	Soft	Fossiliferous sandstone	4	32	Intermediate	7.9	524	0.92	0	2.5Y 7/4	Light yellow	22.4	17.4	5	20.2	4.4	-0.6
October 2nd	Warm	Warm	18	9	0	0	Lower	Hard	Purple siltstone	1	3	Intermediate	11.6	354	0.91	0	10R 5/1	Reddish grey	23	15.9	7.1	18	5	-2.1
October 2nd	Warm	Warm	18	9	0	0	Lower	Soft	Orange limestone	5	21	Thick	12.4	608	0.91	0	2.5Y 8/4	Pale yellow	19.9	14.5	5.4	15.3	1.9	-3.5
October 2nd	Warm	Warm	18	9	0	0	Lower	Hard	Quartzite	3	25	Thin	9.6	584	0.92	0	10YR 6/2	Greyish yellow brown	22.3	14.4	7.9	18	4.3	-3.6
October 2nd	Warm	Warm	18	9	0	0	Lower	Soft	Fossiliferous sandstone	4	33	Intermediate	8.6	680	0.91	0	2.5Y 6/4	Dull yellow	22.4	17.2	5.2	18	4.4	-0.8
October 2nd	Warm	Warm	18	9	0	0	Lower	Hard	Grey siltstone	2	12	Thin	7.5	576	0.94	0	N 6/0	Grey	24.6	16.8	7.8	18.4	6.6	-1.2
October 2nd	Warm	Warm	18	9	0	0	Lower	Soft	Orange limestone	5	20	Thick	11.7	420	0.97	0	10YR 8/3	Light yellow	19.3	15	4.3	16.1	1.3	-3
October 2nd	Warm	Warm	18	9	0	0	Lower	Hard	Quartzite	3	29	Thick	14.1	368	0.94	0	10YR 7/2	Greyish yellow brown	19.9	15.1	4.8	18.6	1.9	-2.9
October 2nd	Warm	Warm	18	9	0	0	Lower	Soft	White limestone	6	16	Thick	12.3	412	0.94	0	2.5Y 8/1	Light grey	20.5	17.3	3.2	18.1	2.5	-0.7
October 2nd	Warm	Warm	18	9	0	0	Lower	Hard	Grey siltstone	2	9	Thick	12.6	532	0.97	0	2.5GY 7/1	Light olive grey	21	17.1	3.9	18	3	-0.9
October 2nd	Warm	Warm	18	9	0	0	Lower	Hard	Quartzite	3	30	Thick	14.3	588	0.9	0	10YR 8/1	Light grey	20.5	14.9	5.6	16.1	2.5	-3.1
October 2nd	Warm	Warm	18	9	0	0	Lower	Hard	Purple siltstone	1	4	Thin	6.4	608	0.95	0	10R 6/1	Reddish grey	23.2	16.2	7	18.7	5.2	-1.8
October 2nd	Warm	Warm	18	9	0	0	Lower	Soft	Fossiliferous sandstone	4	36	Thin	7.5	742	0.88	1	2.5Y 7/4	Light yellow	23.8	16.7	7.1	19.2	5.8	-1.3
October 2nd	Warm	Warm	18	9	0	0	Lower	Soft	Fossiliferous sandstone	4	31	Thin	6.9	580	0.94	0	2.5Y 7/6	Yellowish brown	20.2	17.4	2.8	18.2	2.2	-0.6
October 2nd	Warm	Warm	18	9	0	0	Lower	Soft	White limestone	6	15	Thin	5.9	564	0.92	2	2.5Y 8/1	Light grey	22.7	18.1	4.6	18.8	4.7	0.1
October 2nd	Warm	Warm	18	9	0	0	Lower	Soft	Orange limestone	5	22	Intermediate	7.6	584	0.94	0	2.5Y 7/4	Light yellow	20.9	17.3	3.6	17.6	2.9	-0.7
October 2nd	Warm	Warm	18	9	0	0	Lower	Hard	Grey siltstone	2	7	Thick	12.3	544	0.95	0	N 7/0	Greyish white	21.1	17.1	4	18.2	3.1	-0.9
October 2nd	Warm	Warm	18	9	0	0	Lower	Soft	Orange limestone	5	23	Thin	6.1	792	0.94	0	5Y 8/3	Pale yellow	23.3	17.1	6.2	18.8	5.3	-0.9
October 2nd	Warm	Warm	18	9	0	0	Lower	Hard	Purple siltstone	1	2	Thick	14.3	456	0.94	0	7.5YR 5/1	Brownish grey	21.5	17	4.5	18.4	3.5	-1
October 2nd	Warm	Warm	18	9	0	0	Lower	Soft	White limestone	6	13	Intermediate	9.4	492	0.91	2	2.5Y 8/1	Light grey	21.6	16.5	5.1	19.9	3.6	-1.5
October 2nd	Warm	Warm	18	9	0	0	Lower	Hard	Grey siltstone	2	11	Thin	7.3	696	0.92	0	N 7/0	Greyish white	22.4	17.5	4.9	19.3	4.4	-0.5
October 2nd	Warm	Warm	18	9	0	0	Lower	Hard	Purple siltstone	1	1	Intermediate	11.2	408	0.94	0	2.5YR 5/1	Reddish grey	24.5	19.3	5.2	20.7	6.5	1.3
October 2nd	Warm	Warm	18	9	0	0	Lower	Hard	Grey siltstone	2	10	Intermediate	8.4	556	0.94	0	2.5GY 7/1	Light olive grey	24.1	18.4	5.7	19.9	6.1	0.4
October 2nd	Warm	Warm	18	9	0	0	Lower	Soft	Orange limestone	5	19	Intermediate	6.8	528	0.92	0	2.5Y 6/4	Dull yellow	23.7	17.7	6	18.8	5.7	-0.3
October 2nd	Warm	Warm	18	9	0	0	Lower	Soft	White limestone	6	14	Thin	6.5	816	0.95	2	2.5Y 8/1	Light grey	21.1	17.2	3.9	17.4	3.1	-0.8
October 2nd	Warm	Warm	18	9	0	0	Lower	Soft	Fossiliferous sandstone	4	35	Thick	15	664	0.91	1	2.5Y 5/6	Yellowish brown	23.1	16.9	6.2	18	5.1	-1.1
October 2nd	Warm	Warm	18	9	0	0	Lower	Hard	Purple siltstone	1	5	Thin	6.5	496	0.97	0	10R 6/1	Reddish grey	26.4	20.3	6.1	21.5	8.4	2.3
October 2nd	Warm	Warm	18	9	0	0	Lower	Hard	Quartzite	3	28	Intermediate	12.6	464	0.92	0	10YR 8/1	Light grey	22.5	16.1	6.4	16.7	4.5	-1.9
October 2nd	Warm	Warm	18	9	0	0	Lower	Soft	Orange limestone	5	24	Thin	6	588	0.94	1	2.5Y 7/4	Light yellow	22.7	17.2	5.5	18.7	4.7	-0.8
October 2nd	Warm	Warm	18	9	0	0	Lower	Hard	Quartzite	3	27	Intermediate	11.1	448	0.94	0	10YR 8/1	Light grey	20.2	17	3.2	18.6	2.2	-1
October 2nd	Warm	Warm	18	9	0	0	Lower	Soft	White limestone	6	18	Thick	12	504	0.81	0	2.5Y 8/1	Light grey	24.3	16.9	7.4	18	6.3	-1.1
October 2nd	Warm	Warm	18	9	0	0	Lower	Soft	Fossiliferous sandstone	4	34	Thick	13.9	520	0.95	0	2.5Y 7/4	Light yellow	22.7	17.4	5.3	18.8	4.7	-0.6
October 2nd	Warm	Warm	18	9	0	0	Lower	Hard	Purple siltstone	1	6	Thick	13.5	516	1	0	7.5R 5/1	Reddish grey	23.8	19	4.8	20.3	5.8	1
October 2nd	Warm	Warm	18	9	0	0	Lower	Hard	Quartzite	3	26	Thin	7.9	496	0.94	0	10YR 7/2	Greyish yellow brown	23.6	19.5	4.1	21.3	5.6	1.5
October 2nd	Warm	Warm	18	9	0	0	Lower	Soft	White limestone	6	17	Intermediate	9.5	448	0.92	1	2.5Y 8/1	Light grey	21.8	17.4	4.4	19.3	3.8	-0.6
October 2nd	Warm	Warm	18	9	0	0	Lower	Hard	Grey siltstone	2	8	Intermediate	8.1	584	0.97	0	2.5GY 6/1	Olive grey	25.5	17.9	7.6	20.5	7.5	-0.1
October 2nd	Warm	Warm	18	9	0	0	Lower	Soft	Fossiliferous sandstone	4	32	Intermediate	7.9	536	0.91	0	2.5Y 7/4	Light yellow	24	18.4	5.6	20.2	6	0.4
October 2nd	Warm	Warm	18	9	0	60	Upper	Hard	Purple siltstone	1	3	Intermediate	11.6	424	0.91	0	10R 5/1	Reddish grey	32.8	21.5	11.3	27.4	14.8	3.5	24.8	17.1	7.7	8	32.2581	4.4	25.731	3.6
October 2nd	Warm	Warm	18	9	0	60	Upper	Soft	Orange limestone	5	21	Thick	12.4	676	0.88	1	2.5Y 8/4	Pale yellow	28.2	16.8	11.4	20.7	10.2	-1.2	22.3	15.4	6.9	5.9	26.4574	1.4	9.09091	4.5
October 2nd	Warm	Warm	18	9	0	60	Upper	Hard	Quartzite	3	25	Thin	9.6	636	0.87	0	10YR 6/2	Greyish yellow brown	27	17.9	9.1	20.7	9	-0.1	20	14.3	5.7	7	35	3.6	25.1748	3.4
October 2nd	Warm	Warm	18	9	0	60	Upper	Soft	Fossiliferous sandstone	4	33	Intermediate	8.6	672	0.85	0	2.5Y 6/4	Dull yellow	29.8	19.5	10.3	23.3	11.8	1.5	22	16.6	5.4	7.8	35.4545	2.9	17.4699	4.9
October 2nd	Warm	Warm	18	9	0	60	Upper	Hard	Grey siltstone	2	12	Thin	7.5	580	0.95	0	N 6/0	Grey	33.1	25.6	7.5	27.3	15.1	7.6	21.8	18.5	3.3	11.3	51.8349	7.1	38.3784	4.2
October 2nd	Warm	Warm	18	9	0	60	Upper	Soft	Orange limestone	5	20	Thick	11.7	356	0.92	0	10YR 8/3	Light yellow	27.4	18.2	9.2	21	9.4	0.2	22.4	17	5.4	5	22.3214	1.2	7.05882	3.8
October 2nd	Warm	Warm	18	9	0	60	Upper	Hard	Quartzite	3	29	Thick	14.1	400	0.94	1	10YR 7/2	Greyish yellow brown	23.6	15.7	7.9	21.3	5.6	-2.3	20.1	15.5	4.6	3.5	17.4129	0.2	1.29032	3.3
October 2nd	Warm	Warm	18	9	0	60	Upper	Soft	White limestone	6	16	Thick	12.3	460	0.94	1	2.5Y 8/1	Light grey	24	15.6	8.4	19.3	6	-2.4	21.7	16	5.7	2.3	10.5991	-0.4	-2.5	2.7
October 2nd	Warm	Warm	18	9	0	60	Upper	Hard	Grey siltstone	2	9	Thick	12.6	624	0.92	0	2.5GY 7/1	Light olive grey	31.1	19.7	11.4	23.5	13.1	1.7	22.3	15.3	7	8.8	39.4619	4.4	28.7582	4.4
October 2nd	Warm	Warm	18	9	0	60	Upper	Hard	Quartzite	3	30	Thick	14.3	376	0.96	0	10YR 8/1	Light grey	23.7	15	8.7	16.4	5.7	-3	19	13.8	5.2	4.7	24.7368	1.2	8.69565	3.5
October 2nd	Warm	Warm	18	9	0	60	Upper	Hard	Purple siltstone	1	4	Thin	6.4	608	0.94	0	10R 6/1	Reddish grey	27.8	19	8.8	22.5	9.8	1	18.9	15.2	3.7	8.9	47.0899	3.8	25	5.1
October 2nd	Warm	Warm	18	9	0	60	Upper	Soft	Fossiliferous sandstone	4	36	Thin	7.5	732	0.86	0	2.5Y 7/4	Light yellow	30.6	22.7	7.9	24.2	12.6	4.7	20.7	14.5	6.2	9.9	47.8261	8.2	56.5517	1.7
October 2nd	Warm	Warm	18	9	0	60	Upper	Soft	Fossiliferous sandstone	4	31	Thin	6.9	588	0.94	0	2.5Y 7/6	Yellowish brown	31.1	17.5	13.6	24.1	13.1	-0.5	20.9	16	4.9	10.2	48.8038	1.5	9.375	8.7
October 2nd	Warm	Warm	18	9	0	60	Upper	Soft	White limestone	6	15	Thin	5.9	612	0.82	1	2.5Y 8/1	Light grey	26.9	20.2	6.7	22.5	8.9	2.2	19.1	15.3	3.8	7.8	40.8377	4.9	32.0261	2.9
October 2nd	Warm	Warm	18	9	0	60	Upper	Soft	Orange limestone	5	22	Intermediate	7.6	632	0.94	0	2.5Y 7/4	Light yellow	31.1	20.3	10.8	25.7	13.1	2.3	22	15.8	6.2	9.1	41.3636	4.5	28.481	4.6
October 2nd	Warm	Warm	18	9	0	60	Upper	Hard	Grey siltstone	2	7	Thick	12.3	436	0.94	0	N 7/0	Greyish white	30.5	19.4	11.1	26.6	12.5	1.4	22.4	14.8	7.6	8.1	36.1607	4.6	31.0811	3.5
October 2nd	Warm	Warm	18	9	0	60	Upper	Soft	Orange limestone	5	23	Thin	6.1	808	0.91	0	5Y 8/3	Pale yellow	28.7	20.6	8.1	24.9	10.7	2.6	21.9	16.7	5.2	6.8	31.0502	3.9	23.3533	2.9
October 2nd	Warm	Warm	18	9	0	60	Upper	Hard	Purple siltstone	1	2	Thick	14.3	484	0.97	0	7.5YR 5/1	Brownish grey	34.2	21.8	12.4	27.1	16.2	3.8	23.7	16	7.7	10.5	44.3038	5.8	36.25	4.7
October 2nd	Warm	Warm	18	9	0	60	Upper	Soft	White limestone	6	13	Intermediate	9.4	592	0.91	2	2.5Y 8/1	Light grey	27.4	18.9	8.5	22.9	9.4	0.9	22.4	16.5	5.9	5	22.3214	2.4	14.5455	2.6
October 2nd	Warm	Warm	18	9	0	60	Upper	Hard	Grey siltstone	2	11	Thin	7.3	688	0.94	0	N 7/0	Greyish white	33.2	22.2	11	28.1	15.2	4.2	22.3	17.6	4.7	10.9	48.8789	4.6	26.1364	6.3
October 2nd	Warm	Warm	18	9	0	60	Upper	Hard	Purple siltstone	1	1	Intermediate	11.2	384	0.92	0	2.5YR 5/1	Reddish grey	32.9	23.2	9.7	29.8	14.9	5.2	22.8	16.7	6.1	10.1	44.2982	6.5	38.9222	3.6
October 2nd	Warm	Warm	18	9	0	60	Upper	Hard	Grey siltstone	2	10	Intermediate	8.4	552	0.94	0	2.5GY 7/1	Light olive grey	30.3	20.8	9.5	26.9	12.3	2.8	20.5	16.3	4.2	9.8	47.8049	4.5	27.6074	5.3
October 2nd	Warm	Warm	18	9	0	60	Upper	Soft	Orange limestone	5	19	Intermediate	6.8	604	0.94	0	2.5Y 6/4	Dull yellow	29.6	18.6	11	22.7	11.6	0.6	22.8	16.7	6.1	6.8	29.8246	1.9	11.3772	4.9
October 2nd	Warm	Warm	18	9	0	60	Upper	Soft	White limestone	6	14	Thin	6.5	830	0.97	4	2.5Y 8/1	Light grey	27.3	16	11.3	21.7	9.3	-2	22.1	15.2	6.9	5.2	23.5294	0.8	5.26316	4.4
October 2nd	Warm	Warm	18	9	0	60	Upper	Soft	Fossiliferous sandstone	4	35	Thick	15	704	0.91	0	2.5Y 5/6	Yellowish brown	32.8	20.8	12	25.7	14.8	2.8	25.1	16.6	8.5	7.7	30.6773	4.2	25.3012	3.5
October 2nd	Warm	Warm	18	9	0	60	Upper	Hard	Purple siltstone	1	5	Thin	6.5	508	0.92	0	10R 6/1	Reddish grey	32.3	21.8	10.5	28.8	14.3	3.8	22.9	17.1	5.8	9.4	41.048	4.7	27.4854	4.7
October 2nd	Warm	Warm	18	9	0	60	Upper	Hard	Quartzite	3	28	Intermediate	12.6	328	0.95	0	10YR 8/1	Light grey	22.1	17.9	4.2	18.7	4.1	-0.1	19	14.7	4.3	3.1	16.3158	3.2	21.7687	-0.1
October 2nd	Warm	Warm	18	9	0	60	Upper	Soft	Orange limestone	5	24	Thin	6	620	0.94	0	2.5Y 7/4	Light yellow	29.6	18.7	10.9	22.9	11.6	0.7	23.3	17.4	5.9	6.3	27.0386	1.3	7.47126	5
October 2nd	Warm	Warm	18	9	0	60	Upper	Hard	Quartzite	3	27	Intermediate	11.1	444	0.94	0	10YR 8/1	Light grey	21.8	17.1	4.7	19.5	3.8	-0.9	19.1	15.5	3.6	2.7	14.1361	1.6	10.3226	1.1
October 2nd	Warm	Warm	18	9	0	60	Upper	Soft	White limestone	6	18	Thick	12	544	0.85	1	2.5Y 8/1	Light grey	27.8	17.1	10.7	22.2	9.8	-0.9	21.9	16	5.9	5.9	26.9406	1.1	6.875	4.8
October 2nd	Warm	Warm	18	9	0	60	Upper	Soft	Fossiliferous sandstone	4	34	Thick	13.9	436	0.76	0	2.5Y 7/4	Light yellow	30.2	18	12.2	22	12.2	0	21.3	15.8	5.5	8.9	41.784	2.2	13.9241	6.7
October 2nd	Warm	Warm	18	9	0	60	Upper	Hard	Purple siltstone	1	6	Thick	13.5	596	0.94	0	7.5R 5/1	Reddish grey	31.1	20.2	10.9	25.9	13.1	2.2	22.4	16.3	6.1	8.7	38.8393	3.9	23.9264	4.8
October 2nd	Warm	Warm	18	9	0	60	Upper	Hard	Quartzite	3	26	Thin	7.9	500	0.97	0	10YR 7/2	Greyish yellow brown	24.1	18.1	6	19.7	6.1	0.1	20.2	16.4	3.8	3.9	19.3069	1.7	10.3659	2.2
October 2nd	Warm	Warm	18	9	0	60	Upper	Soft	White limestone	6	17	Intermediate	9.5	444	0.95	0	2.5Y 8/1	Light grey	27.1	15.6	11.5	21.2	9.1	-2.4	21.3	15.3	6	5.8	27.23	0.3	1.96078	5.5
October 2nd	Warm	Warm	18	9	0	60	Upper	Hard	Grey siltstone	2	8	Intermediate	8.1	592	0.97	0	2.5GY 6/1	Olive grey	31	19.6	11.4	25.8	13	1.6	23.6	16.9	6.7	7.4	31.3559	2.7	15.9763	4.7
October 2nd	Warm	Warm	18	9	0	60	Upper	Soft	Fossiliferous sandstone	4	32	Intermediate	7.9	524	0.92	0	2.5Y 7/4	Light yellow	29.1	20	9.1	22.5	11.1	2	22.4	17.4	5	6.7	29.9107	2.6	14.9425	4.1
October 2nd	Warm	Warm	18	9	0	60	Lower	Hard	Purple siltstone	1	3	Intermediate	11.6	354	0.91	0	10R 5/1	Reddish grey	27	17.8	9.2	21.7	9	-0.2	23	15.9	7.1	4	17.3913	1.9	11.9497	2.1
October 2nd	Warm	Warm	18	9	0	60	Lower	Soft	Orange limestone	5	21	Thick	12.4	608	0.91	0	2.5Y 8/4	Pale yellow	22.6	13.5	9.1	15.9	4.6	-4.5	19.9	14.5	5.4	2.7	13.5678	-1	-6.89655	3.7
October 2nd	Warm	Warm	18	9	0	60	Lower	Hard	Quartzite	3	25	Thin	9.6	584	0.92	0	10YR 6/2	Greyish yellow brown	27.7	15.3	12.4	19.2	9.7	-2.7	22.3	14.4	7.9	5.4	24.2152	0.9	6.25	4.5
October 2nd	Warm	Warm	18	9	0	60	Lower	Soft	Fossiliferous sandstone	4	33	Intermediate	8.6	680	0.91	0	2.5Y 6/4	Dull yellow	24.1	16.5	7.6	20.9	6.1	-1.5	22.4	17.2	5.2	1.7	7.58929	-0.7	-4.06977	2.4
October 2nd	Warm	Warm	18	9	0	60	Lower	Hard	Grey siltstone	2	12	Thin	7.5	576	0.94	0	N 6/0	Grey	32.6	21.1	11.5	21.8	14.6	3.1	24.6	16.8	7.8	8	32.5203	4.3	25.5952	3.7
October 2nd	Warm	Warm	18	9	0	60	Lower	Soft	Orange limestone	5	20	Thick	11.7	420	0.97	0	10YR 8/3	Light yellow	20.7	14.3	6.4	15.7	2.7	-3.7	19.3	15	4.3	1.4	7.25389	-0.7	-4.66667	2.1
October 2nd	Warm	Warm	18	9	0	60	Lower	Hard	Quartzite	3	29	Thick	14.1	368	0.94	0	10YR 7/2	Greyish yellow brown	21	15.7	5.3	18.4	3	-2.3	19.9	15.1	4.8	1.1	5.52764	0.6	3.97351	0.5
October 2nd	Warm	Warm	18	9	0	60	Lower	Soft	White limestone	6	16	Thick	12.3	412	0.94	0	2.5Y 8/1	Light grey	21.3	16.6	4.7	18	3.3	-1.4	20.5	17.3	3.2	0.8	3.90244	-0.7	-4.04624	1.5
October 2nd	Warm	Warm	18	9	0	60	Lower	Hard	Grey siltstone	2	9	Thick	12.6	532	0.97	0	2.5GY 7/1	Light olive grey	24.7	18.4	6.3	20.2	6.7	0.4	21	17.1	3.9	3.7	17.619	1.3	7.60234	2.4
October 2nd	Warm	Warm	18	9	0	60	Lower	Hard	Quartzite	3	30	Thick	14.3	588	0.9	0	10YR 8/1	Light grey	23.3	16.2	7.1	18.2	5.3	-1.8	20.5	14.9	5.6	2.8	13.6585	1.3	8.72483	1.5
October 2nd	Warm	Warm	18	9	0	60	Lower	Hard	Purple siltstone	1	4	Thin	6.4	608	0.95	0	10R 6/1	Reddish grey	26.7	20.1	6.6	22.5	8.7	2.1	23.2	16.2	7	3.5	15.0862	3.9	24.0741	-0.4
October 2nd	Warm	Warm	18	9	0	60	Lower	Soft	Fossiliferous sandstone	4	36	Thin	7.5	742	0.88	1	2.5Y 7/4	Light yellow	31.4	18.5	12.9	22.3	13.4	0.5	23.8	16.7	7.1	7.6	31.9328	1.8	10.7784	5.8
October 2nd	Warm	Warm	18	9	0	60	Lower	Soft	Fossiliferous sandstone	4	31	Thin	6.9	580	0.94	0	2.5Y 7/6	Yellowish brown	33.2	18.7	14.5	21.2	15.2	0.7	20.2	17.4	2.8	13	64.3564	1.3	7.47126	11.7
October 2nd	Warm	Warm	18	9	0	60	Lower	Soft	White limestone	6	15	Thin	5.9	564	0.92	2	2.5Y 8/1	Light grey	27.8	19	8.8	19.9	9.8	1	22.7	18.1	4.6	5.1	22.467	0.9	4.97238	4.2
October 2nd	Warm	Warm	18	9	0	60	Lower	Soft	Orange limestone	5	22	Intermediate	7.6	584	0.94	0	2.5Y 7/4	Light yellow	26.7	18.6	8.1	19.9	8.7	0.6	20.9	17.3	3.6	5.8	27.7512	1.3	7.51445	4.5
October 2nd	Warm	Warm	18	9	0	60	Lower	Hard	Grey siltstone	2	7	Thick	12.3	544	0.95	0	N 7/0	Greyish white	27.4	20.9	6.5	21.7	9.4	2.9	21.1	17.1	4	6.3	29.8578	3.8	22.2222	2.5
October 2nd	Warm	Warm	18	9	0	60	Lower	Soft	Orange limestone	5	23	Thin	6.1	792	0.94	0	5Y 8/3	Pale yellow	26.1	18.5	7.6	20.8	8.1	0.5	23.3	17.1	6.2	2.8	12.0172	1.4	8.18713	1.4
October 2nd	Warm	Warm	18	9	0	60	Lower	Hard	Purple siltstone	1	2	Thick	14.3	456	0.94	0	7.5YR 5/1	Brownish grey	25.7	19.4	6.3	22.8	7.7	1.4	21.5	17	4.5	4.2	19.5349	2.4	14.1176	1.8
October 2nd	Warm	Warm	18	9	0	60	Lower	Soft	White limestone	6	13	Intermediate	9.4	492	0.91	2	2.5Y 8/1	Light grey	25.7	16.8	8.9	21.3	7.7	-1.2	21.6	16.5	5.1	4.1	18.9815	0.3	1.81818	3.8
October 2nd	Warm	Warm	18	9	0	60	Lower	Hard	Grey siltstone	2	11	Thin	7.3	696	0.92	0	N 7/0	Greyish white	33.9	21.8	12.1	22.8	15.9	3.8	22.4	17.5	4.9	11.5	51.3393	4.3	24.5714	7.2
October 2nd	Warm	Warm	18	9	0	60	Lower	Hard	Purple siltstone	1	1	Intermediate	11.2	408	0.94	0	2.5YR 5/1	Reddish grey	32.7	23.1	9.6	25.1	14.7	5.1	24.5	19.3	5.2	8.2	33.4694	3.8	19.6891	4.4
October 2nd	Warm	Warm	18	9	0	60	Lower	Hard	Grey siltstone	2	10	Intermediate	8.4	556	0.94	0	2.5GY 7/1	Light olive grey	29.7	22.9	6.8	23.5	11.7	4.9	24.1	18.4	5.7	5.6	23.2365	4.5	24.4565	1.1
October 2nd	Warm	Warm	18	9	0	60	Lower	Soft	Orange limestone	5	19	Intermediate	6.8	528	0.92	0	2.5Y 6/4	Dull yellow	27.4	20.4	7	21.3	9.4	2.4	23.7	17.7	6	3.7	15.6118	2.7	15.2542	1
October 2nd	Warm	Warm	18	9	0	60	Lower	Soft	White limestone	6	14	Thin	6.5	816	0.95	2	2.5Y 8/1	Light grey	28.9	19.4	9.5	20	10.9	1.4	21.1	17.2	3.9	7.8	36.9668	2.2	12.7907	5.6
October 2nd	Warm	Warm	18	9	0	60	Lower	Soft	Fossiliferous sandstone	4	35	Thick	15	664	0.91	1	2.5Y 5/6	Yellowish brown	24.9	18.7	6.2	19.6	6.9	0.7	23.1	16.9	6.2	1.8	7.79221	1.8	10.6509	0
October 2nd	Warm	Warm	18	9	0	60	Lower	Hard	Purple siltstone	1	5	Thin	6.5	496	0.97	0	10R 6/1	Reddish grey	30.6	25.3	5.3	25.6	12.6	7.3	26.4	20.3	6.1	4.2	15.9091	5	24.6305	-0.8
October 2nd	Warm	Warm	18	9	0	60	Lower	Hard	Quartzite	3	28	Intermediate	12.6	464	0.92	0	10YR 8/1	Light grey	23.6	18.8	4.8	20.3	5.6	0.8	22.5	16.1	6.4	1.1	4.88889	2.7	16.7702	-1.6
October 2nd	Warm	Warm	18	9	0	60	Lower	Soft	Orange limestone	5	24	Thin	6	588	0.94	1	2.5Y 7/4	Light yellow	26.6	19.8	6.8	21.3	8.6	1.8	22.7	17.2	5.5	3.9	17.1806	2.6	15.1163	1.3
October 2nd	Warm	Warm	18	9	0	60	Lower	Hard	Quartzite	3	27	Intermediate	11.1	448	0.94	0	10YR 8/1	Light grey	24.1	19.3	4.8	20.7	6.1	1.3	20.2	17	3.2	3.9	19.3069	2.3	13.5294	1.6
October 2nd	Warm	Warm	18	9	0	60	Lower	Soft	White limestone	6	18	Thick	12	504	0.81	0	2.5Y 8/1	Light grey	23.2	16.5	6.7	18.3	5.2	-1.5	24.3	16.9	7.4	-1.1	-4.52675	-0.4	-2.36686	-0.7
October 2nd	Warm	Warm	18	9	0	60	Lower	Soft	Fossiliferous sandstone	4	34	Thick	13.9	520	0.95	0	2.5Y 7/4	Light yellow	26.3	19.6	6.7	21.5	8.3	1.6	22.7	17.4	5.3	3.6	15.859	2.2	12.6437	1.4
October 2nd	Warm	Warm	18	9	0	60	Lower	Hard	Purple siltstone	1	6	Thick	13.5	516	1	0	7.5R 5/1	Reddish grey	25.6	21.2	4.4	22.6	7.6	3.2	23.8	19	4.8	1.8	7.56303	2.2	11.5789	-0.4
October 2nd	Warm	Warm	18	9	0	60	Lower	Hard	Quartzite	3	26	Thin	7.9	496	0.94	0	10YR 7/2	Greyish yellow brown	27.3	22.4	4.9	25.5	9.3	4.4	23.6	19.5	4.1	3.7	15.678	2.9	14.8718	0.8
October 2nd	Warm	Warm	18	9	0	60	Lower	Soft	White limestone	6	17	Intermediate	9.5	448	0.92	1	2.5Y 8/1	Light grey	25.2	18.1	7.1	20.8	7.2	0.1	21.8	17.4	4.4	3.4	15.5963	0.7	4.02299	2.7
October 2nd	Warm	Warm	18	9	0	60	Lower	Hard	Grey siltstone	2	8	Intermediate	8.1	584	0.97	0	2.5GY 6/1	Olive grey	31.2	22.6	8.6	24.4	13.2	4.6	25.5	17.9	7.6	5.7	22.3529	4.7	26.257	1
October 2nd	Warm	Warm	18	9	0	60	Lower	Soft	Fossiliferous sandstone	4	32	Intermediate	7.9	536	0.91	0	2.5Y 7/4	Light yellow	25.5	19.6	5.9	21.6	7.5	1.6	24	18.4	5.6	1.5	6.25	1.2	6.52174	0.3
October 2nd	Warm	Warm	20	9	0	120	Upper	Hard	Purple siltstone	1	3	Intermediate	11.6	424	0.91	0	10R 5/1	Reddish grey	37.4	27.1	10.3	34.4	17.4	7.1	32.8	21.5	11.3	4.6	14.0244	5.6	26.0465	-1
October 2nd	Warm	Warm	20	9	0	120	Upper	Soft	Orange limestone	5	21	Thick	12.4	676	0.88	1	2.5Y 8/4	Pale yellow	32.2	20.2	12	25.6	12.2	0.2	28.2	16.8	11.4	4	14.1844	3.4	20.2381	0.6
October 2nd	Warm	Warm	20	9	0	120	Upper	Hard	Quartzite	3	25	Thin	9.6	636	0.87	0	10YR 6/2	Greyish yellow brown	30.8	22.5	8.3	25.9	10.8	2.5	27	17.9	9.1	3.8	14.0741	4.6	25.6983	-0.8
October 2nd	Warm	Warm	20	9	0	120	Upper	Soft	Fossiliferous sandstone	4	33	Intermediate	8.6	672	0.85	0	2.5Y 6/4	Dull yellow	35.8	24.4	11.4	29.7	15.8	4.4	29.8	19.5	10.3	6	20.1342	4.9	25.1282	1.1
October 2nd	Warm	Warm	20	9	0	120	Upper	Hard	Grey siltstone	2	12	Thin	7.5	580	0.95	0	N 6/0	Grey	38.1	31.3	6.8	34	18.1	11.3	33.1	25.6	7.5	5	15.1057	5.7	22.2656	-0.7
October 2nd	Warm	Warm	20	9	0	120	Upper	Soft	Orange limestone	5	20	Thick	11.7	356	0.92	0	10YR 8/3	Light yellow	30.5	17.5	13	25.3	10.5	-2.5	27.4	18.2	9.2	3.1	11.3139	-0.7	-3.84615	3.8
October 2nd	Warm	Warm	20	9	0	120	Upper	Hard	Quartzite	3	29	Thick	14.1	400	0.94	1	10YR 7/2	Greyish yellow brown	28.2	21.2	7	24.6	8.2	1.2	23.6	15.7	7.9	4.6	19.4915	5.5	35.0318	-0.9
October 2nd	Warm	Warm	20	9	0	120	Upper	Soft	White limestone	6	16	Thick	12.3	460	0.94	1	2.5Y 8/1	Light grey	31.6	18.1	13.5	25.4	11.6	-1.9	24	15.6	8.4	7.6	31.6667	2.5	16.0256	5.1
October 2nd	Warm	Warm	20	9	0	120	Upper	Hard	Grey siltstone	2	9	Thick	12.6	624	0.92	0	2.5GY 7/1	Light olive grey	36.1	24.8	11.3	30.1	16.1	4.8	31.1	19.7	11.4	5	16.0772	5.1	25.8883	-0.1
October 2nd	Warm	Warm	20	9	0	120	Upper	Hard	Quartzite	3	30	Thick	14.3	376	0.96	0	10YR 8/1	Light grey	26.5	19.6	6.9	23.1	6.5	-0.4	23.7	15	8.7	2.8	11.8143	4.6	30.6667	-1.8
October 2nd	Warm	Warm	20	9	0	120	Upper	Hard	Purple siltstone	1	4	Thin	6.4	608	0.94	0	10R 6/1	Reddish grey	32.2	23.8	8.4	28.5	12.2	3.8	27.8	19	8.8	4.4	15.8273	4.8	25.2632	-0.4
October 2nd	Warm	Warm	20	9	0	120	Upper	Soft	Fossiliferous sandstone	4	36	Thin	7.5	732	0.86	0	2.5Y 7/4	Light yellow	34.4	22.4	12	29.1	14.4	2.4	30.6	22.7	7.9	3.8	12.4183	-0.3	-1.32159	4.1
October 2nd	Warm	Warm	20	9	0	120	Upper	Soft	Fossiliferous sandstone	4	31	Thin	6.9	588	0.94	0	2.5Y 7/6	Yellowish brown	36.2	24.7	11.5	29.8	16.2	4.7	31.1	17.5	13.6	5.1	16.3987	7.2	41.1429	-2.1
October 2nd	Warm	Warm	20	9	0	120	Upper	Soft	White limestone	6	15	Thin	5.9	612	0.82	1	2.5Y 8/1	Light grey	31.4	21.9	9.5	26.8	11.4	1.9	26.9	20.2	6.7	4.5	16.7286	1.7	8.41584	2.8
October 2nd	Warm	Warm	20	9	0	120	Upper	Soft	Orange limestone	5	22	Intermediate	7.6	632	0.94	0	2.5Y 7/4	Light yellow	35.3	24.7	10.6	30.7	15.3	4.7	31.1	20.3	10.8	4.2	13.5048	4.4	21.6749	-0.2
October 2nd	Warm	Warm	20	9	0	120	Upper	Hard	Grey siltstone	2	7	Thick	12.3	436	0.94	0	N 7/0	Greyish white	35.5	26.8	8.7	32	15.5	6.8	30.5	19.4	11.1	5	16.3934	7.4	38.1443	-2.4
October 2nd	Warm	Warm	20	9	0	120	Upper	Soft	Orange limestone	5	23	Thin	6.1	808	0.91	0	5Y 8/3	Pale yellow	32.8	24.6	8.2	29.2	12.8	4.6	28.7	20.6	8.1	4.1	14.2857	4	19.4175	0.1
October 2nd	Warm	Warm	20	9	0	120	Upper	Hard	Purple siltstone	1	2	Thick	14.3	484	0.97	0	7.5YR 5/1	Brownish grey	38.2	26.5	11.7	33.6	18.2	6.5	34.2	21.8	12.4	4	11.6959	4.7	21.5596	-0.7
October 2nd	Warm	Warm	20	9	0	120	Upper	Soft	White limestone	6	13	Intermediate	9.4	592	0.91	2	2.5Y 8/1	Light grey	30.9	21.9	9	27.5	10.9	1.9	27.4	18.9	8.5	3.5	12.7737	3	15.873	0.5
October 2nd	Warm	Warm	20	9	0	120	Upper	Hard	Grey siltstone	2	11	Thin	7.3	688	0.94	0	N 7/0	Greyish white	37.8	27.3	10.5	34.4	17.8	7.3	33.2	22.2	11	4.6	13.8554	5.1	22.973	-0.5
October 2nd	Warm	Warm	20	9	0	120	Upper	Hard	Purple siltstone	1	1	Intermediate	11.2	384	0.92	0	2.5YR 5/1	Reddish grey	37.1	29.1	8	35.2	17.1	9.1	32.9	23.2	9.7	4.2	12.766	5.9	25.431	-1.7
October 2nd	Warm	Warm	20	9	0	120	Upper	Hard	Grey siltstone	2	10	Intermediate	8.4	552	0.94	0	2.5GY 7/1	Light olive grey	35.1	27.2	7.9	32.5	15.1	7.2	30.3	20.8	9.5	4.8	15.8416	6.4	30.7692	-1.6
October 2nd	Warm	Warm	20	9	0	120	Upper	Soft	Orange limestone	5	19	Intermediate	6.8	604	0.94	0	2.5Y 6/4	Dull yellow	33.5	23	10.5	27.2	13.5	3	29.6	18.6	11	3.9	13.1757	4.4	23.6559	-0.5
October 2nd	Warm	Warm	20	9	0	120	Upper	Soft	White limestone	6	14	Thin	6.5	830	0.97	4	2.5Y 8/1	Light grey	31.5	19.9	11.6	27.5	11.5	-0.1	27.3	16	11.3	4.2	15.3846	3.9	24.375	0.3
October 2nd	Warm	Warm	20	9	0	120	Upper	Soft	Fossiliferous sandstone	4	35	Thick	15	704	0.91	0	2.5Y 5/6	Yellowish brown	36.6	29.7	6.9	32.8	16.6	9.7	32.8	20.8	12	3.8	11.5854	8.9	42.7885	-5.1
October 2nd	Warm	Warm	20	9	0	120	Upper	Hard	Purple siltstone	1	5	Thin	6.5	508	0.92	0	10R 6/1	Reddish grey	37.4	27.8	9.6	35.3	17.4	7.8	32.3	21.8	10.5	5.1	15.7895	6	27.5229	-0.9
October 2nd	Warm	Warm	20	9	0	120	Upper	Hard	Quartzite	3	28	Intermediate	12.6	328	0.95	0	10YR 8/1	Light grey	25.7	20.9	4.8	22.1	5.7	0.9	22.1	17.9	4.2	3.6	16.2896	3	16.7598	0.6
October 2nd	Warm	Warm	20	9	0	120	Upper	Soft	Orange limestone	5	24	Thin	6	620	0.94	0	2.5Y 7/4	Light yellow	32.8	24.3	8.5	28.3	12.8	4.3	29.6	18.7	10.9	3.2	10.8108	5.6	29.9465	-2.4
October 2nd	Warm	Warm	20	9	0	120	Upper	Hard	Quartzite	3	27	Intermediate	11.1	444	0.94	0	10YR 8/1	Light grey	25.5	20	5.5	23.4	5.5	0	21.8	17.1	4.7	3.7	16.9725	2.9	16.9591	0.8
October 2nd	Warm	Warm	20	9	0	120	Upper	Soft	White limestone	6	18	Thick	12	544	0.85	1	2.5Y 8/1	Light grey	31.3	20.5	10.8	27	11.3	0.5	27.8	17.1	10.7	3.5	12.5899	3.4	19.883	0.1
October 2nd	Warm	Warm	20	9	0	120	Upper	Soft	Fossiliferous sandstone	4	34	Thick	13.9	436	0.76	0	2.5Y 7/4	Light yellow	34	23.3	10.7	28.8	14	3.3	30.2	18	12.2	3.8	12.5828	5.3	29.4444	-1.5
October 2nd	Warm	Warm	20	9	0	120	Upper	Hard	Purple siltstone	1	6	Thick	13.5	596	0.94	0	7.5R 5/1	Reddish grey	36.6	26.5	10.1	32.5	16.6	6.5	31.1	20.2	10.9	5.5	17.6849	6.3	31.1881	-0.8
October 2nd	Warm	Warm	20	9	0	120	Upper	Hard	Quartzite	3	26	Thin	7.9	500	0.97	0	10YR 7/2	Greyish yellow brown	30	23.6	6.4	24.8	10	3.6	24.1	18.1	6	5.9	24.4813	5.5	30.3867	0.4
October 2nd	Warm	Warm	20	9	0	120	Upper	Soft	White limestone	6	17	Intermediate	9.5	444	0.95	0	2.5Y 8/1	Light grey	29.8	21.3	8.5	25.4	9.8	1.3	27.1	15.6	11.5	2.7	9.9631	5.7	36.5385	-3
October 2nd	Warm	Warm	20	9	0	120	Upper	Hard	Grey siltstone	2	8	Intermediate	8.1	592	0.97	0	2.5GY 6/1	Olive grey	36.7	26	10.7	32.4	16.7	6	31	19.6	11.4	5.7	18.3871	6.4	32.6531	-0.7
October 2nd	Warm	Warm	20	9	0	120	Upper	Soft	Fossiliferous sandstone	4	32	Intermediate	7.9	524	0.92	0	2.5Y 7/4	Light yellow	33.4	25.2	8.2	28.8	13.4	5.2	29.1	20	9.1	4.3	14.7766	5.2	26	-0.9
October 2nd	Warm	Warm	20	9	0	120	Lower	Hard	Purple siltstone	1	3	Intermediate	11.6	354	0.91	0	10R 5/1	Reddish grey	30.7	21.2	9.5	25.2	10.7	1.2	27	17.8	9.2	3.7	13.7037	3.4	19.1011	0.3
October 2nd	Warm	Warm	20	9	0	120	Lower	Soft	Orange limestone	5	21	Thick	12.4	608	0.91	0	2.5Y 8/4	Pale yellow	24.6	15.8	8.8	19.4	4.6	-4.2	22.6	13.5	9.1	2	8.84956	2.3	17.037	-0.3
October 2nd	Warm	Warm	20	9	0	120	Lower	Hard	Quartzite	3	25	Thin	9.6	584	0.92	0	10YR 6/2	Greyish yellow brown	33.2	19.8	13.4	23.9	13.2	-0.2	27.7	15.3	12.4	5.5	19.8556	4.5	29.4118	1
October 2nd	Warm	Warm	20	9	0	120	Lower	Soft	Fossiliferous sandstone	4	33	Intermediate	8.6	680	0.91	0	2.5Y 6/4	Dull yellow	30.7	20.4	10.3	25.3	10.7	0.4	24.1	16.5	7.6	6.6	27.3859	3.9	23.6364	2.7
October 2nd	Warm	Warm	20	9	0	120	Lower	Hard	Grey siltstone	2	12	Thin	7.5	576	0.94	0	N 6/0	Grey	36.2	25.6	10.6	26.3	16.2	5.6	32.6	21.1	11.5	3.6	11.0429	4.5	21.327	-0.9
October 2nd	Warm	Warm	20	9	0	120	Lower	Soft	Orange limestone	5	20	Thick	11.7	420	0.97	0	10YR 8/3	Light yellow	25.2	16.8	8.4	18.7	5.2	-3.2	20.7	14.3	6.4	4.5	21.7391	2.5	17.4825	2
October 2nd	Warm	Warm	20	9	0	120	Lower	Hard	Quartzite	3	29	Thick	14.1	368	0.94	0	10YR 7/2	Greyish yellow brown	25.9	18.6	7.3	21	5.9	-1.4	21	15.7	5.3	4.9	23.3333	2.9	18.4713	2
October 2nd	Warm	Warm	20	9	0	120	Lower	Soft	White limestone	6	16	Thick	12.3	412	0.94	0	2.5Y 8/1	Light grey	24.6	17.9	6.7	20.2	4.6	-2.1	21.3	16.6	4.7	3.3	15.493	1.3	7.83133	2
October 2nd	Warm	Warm	20	9	0	120	Lower	Hard	Grey siltstone	2	9	Thick	12.6	532	0.97	0	2.5GY 7/1	Light olive grey	27	21.7	5.3	22.7	7	1.7	24.7	18.4	6.3	2.3	9.31174	3.3	17.9348	-1
October 2nd	Warm	Warm	20	9	0	120	Lower	Hard	Quartzite	3	30	Thick	14.3	588	0.9	0	10YR 8/1	Light grey	27.4	18.7	8.7	20.8	7.4	-1.3	23.3	16.2	7.1	4.1	17.5966	2.5	15.4321	1.6
October 2nd	Warm	Warm	20	9	0	120	Lower	Hard	Purple siltstone	1	4	Thin	6.4	608	0.95	0	10R 6/1	Reddish grey	30.7	23.8	6.9	26.2	10.7	3.8	26.7	20.1	6.6	4	14.9813	3.7	18.408	0.3
October 2nd	Warm	Warm	20	9	0	120	Lower	Soft	Fossiliferous sandstone	4	36	Thin	7.5	742	0.88	1	2.5Y 7/4	Light yellow	32.4	22.8	9.6	26.8	12.4	2.8	31.4	18.5	12.9	1	3.18471	4.3	23.2432	-3.3
October 2nd	Warm	Warm	20	9	0	120	Lower	Soft	Fossiliferous sandstone	4	31	Thin	6.9	580	0.94	0	2.5Y 7/6	Yellowish brown	30.1	22.8	7.3	25.2	10.1	2.8	33.2	18.7	14.5	-3.1	-9.33735	4.1	21.9251	-7.2
October 2nd	Warm	Warm	20	9	0	120	Lower	Soft	White limestone	6	15	Thin	5.9	564	0.92	2	2.5Y 8/1	Light grey	33.2	20.5	12.7	23.8	13.2	0.5	27.8	19	8.8	5.4	19.4245	1.5	7.89474	3.9
October 2nd	Warm	Warm	20	9	0	120	Lower	Soft	Orange limestone	5	22	Intermediate	7.6	584	0.94	0	2.5Y 7/4	Light yellow	29	21.7	7.3	24.8	9	1.7	26.7	18.6	8.1	2.3	8.61423	3.1	16.6667	-0.8
October 2nd	Warm	Warm	20	9	0	120	Lower	Hard	Grey siltstone	2	7	Thick	12.3	544	0.95	0	N 7/0	Greyish white	30.9	23.8	7.1	25	10.9	3.8	27.4	20.9	6.5	3.5	12.7737	2.9	13.8756	0.6
October 2nd	Warm	Warm	20	9	0	120	Lower	Soft	Orange limestone	5	23	Thin	6.1	792	0.94	0	5Y 8/3	Pale yellow	32	22.1	9.9	23.3	12	2.1	26.1	18.5	7.6	5.9	22.6054	3.6	19.4595	2.3
October 2nd	Warm	Warm	20	9	0	120	Lower	Hard	Purple siltstone	1	2	Thick	14.3	456	0.94	0	7.5YR 5/1	Brownish grey	28.2	22.7	5.5	25.8	8.2	2.7	25.7	19.4	6.3	2.5	9.72763	3.3	17.0103	-0.8
October 2nd	Warm	Warm	20	9	0	120	Lower	Soft	White limestone	6	13	Intermediate	9.4	492	0.91	2	2.5Y 8/1	Light grey	26.5	19.3	7.2	23.8	6.5	-0.7	25.7	16.8	8.9	0.8	3.11284	2.5	14.881	-1.7
October 2nd	Warm	Warm	20	9	0	120	Lower	Hard	Grey siltstone	2	11	Thin	7.3	696	0.92	0	N 7/0	Greyish white	37.3	25.7	11.6	27.5	17.3	5.7	33.9	21.8	12.1	3.4	10.0295	3.9	17.8899	-0.5
October 2nd	Warm	Warm	20	9	0	120	Lower	Hard	Purple siltstone	1	1	Intermediate	11.2	408	0.94	0	2.5YR 5/1	Reddish grey	37.3	27.8	9.5	28.6	17.3	7.8	32.7	23.1	9.6	4.6	14.0673	4.7	20.3463	-0.1
October 2nd	Warm	Warm	20	9	0	120	Lower	Hard	Grey siltstone	2	10	Intermediate	8.4	556	0.94	0	2.5GY 7/1	Light olive grey	35	26.2	8.8	27.3	15	6.2	29.7	22.9	6.8	5.3	17.8451	3.3	14.4105	2
October 2nd	Warm	Warm	20	9	0	120	Lower	Soft	Orange limestone	5	19	Intermediate	6.8	528	0.92	0	2.5Y 6/4	Dull yellow	31	23.2	7.8	24	11	3.2	27.4	20.4	7	3.6	13.1387	2.8	13.7255	0.8
October 2nd	Warm	Warm	20	9	0	120	Lower	Soft	White limestone	6	14	Thin	6.5	816	0.95	2	2.5Y 8/1	Light grey	33	21.8	11.2	23	13	1.8	28.9	19.4	9.5	4.1	14.1869	2.4	12.3711	1.7
October 2nd	Warm	Warm	20	9	0	120	Lower	Soft	Fossiliferous sandstone	4	35	Thick	15	664	0.91	1	2.5Y 5/6	Yellowish brown	29	21.4	7.6	21.9	9	1.4	24.9	18.7	6.2	4.1	16.4659	2.7	14.4385	1.4
October 2nd	Warm	Warm	20	9	0	120	Lower	Hard	Purple siltstone	1	5	Thin	6.5	496	0.97	0	10R 6/1	Reddish grey	35.3	29.3	6	30	15.3	9.3	30.6	25.3	5.3	4.7	15.3595	4	15.8103	0.7
October 2nd	Warm	Warm	20	9	0	120	Lower	Hard	Quartzite	3	28	Intermediate	12.6	464	0.92	0	10YR 8/1	Light grey	27.6	21.3	6.3	22.8	7.6	1.3	23.6	18.8	4.8	4	16.9492	2.5	13.2979	1.5
October 2nd	Warm	Warm	20	9	0	120	Lower	Soft	Orange limestone	5	24	Thin	6	588	0.94	1	2.5Y 7/4	Light yellow	31.7	23	8.7	24.3	11.7	3	26.6	19.8	6.8	5.1	19.1729	3.2	16.1616	1.9
October 2nd	Warm	Warm	20	9	0	120	Lower	Hard	Quartzite	3	27	Intermediate	11.1	448	0.94	0	10YR 8/1	Light grey	27	21.5	5.5	23.5	7	1.5	24.1	19.3	4.8	2.9	12.0332	2.2	11.399	0.7
October 2nd	Warm	Warm	20	9	0	120	Lower	Soft	White limestone	6	18	Thick	12	504	0.81	0	2.5Y 8/1	Light grey	27.2	19.2	8	20.5	7.2	-0.8	23.2	16.5	6.7	4	17.2414	2.7	16.3636	1.3
October 2nd	Warm	Warm	20	9	0	120	Lower	Soft	Fossiliferous sandstone	4	34	Thick	13.9	520	0.95	0	2.5Y 7/4	Light yellow	29.6	21.8	7.8	24.8	9.6	1.8	26.3	19.6	6.7	3.3	12.5475	2.2	11.2245	1.1
October 2nd	Warm	Warm	20	9	0	120	Lower	Hard	Purple siltstone	1	6	Thick	13.5	516	1	0	7.5R 5/1	Reddish grey	30.5	23.9	6.6	27.7	10.5	3.9	25.6	21.2	4.4	4.9	19.1406	2.7	12.7358	2.2
October 2nd	Warm	Warm	20	9	0	120	Lower	Hard	Quartzite	3	26	Thin	7.9	496	0.94	0	10YR 7/2	Greyish yellow brown	30.3	24.2	6.1	29.2	10.3	4.2	27.3	22.4	4.9	3	10.989	1.8	8.03571	1.2
October 2nd	Warm	Warm	20	9	0	120	Lower	Soft	White limestone	6	17	Intermediate	9.5	448	0.92	1	2.5Y 8/1	Light grey	27.1	19.8	7.3	22.9	7.1	-0.2	25.2	18.1	7.1	1.9	7.53968	1.7	9.39227	0.2
October 2nd	Warm	Warm	20	9	0	120	Lower	Hard	Grey siltstone	2	8	Intermediate	8.1	584	0.97	0	2.5GY 6/1	Olive grey	35.7	27.1	8.6	28.3	15.7	7.1	31.2	22.6	8.6	4.5	14.4231	4.5	19.9115	0
October 2nd	Warm	Warm	20	9	0	120	Lower	Soft	Fossiliferous sandstone	4	32	Intermediate	7.9	536	0.91	0	2.5Y 7/4	Light yellow	29.1	23.2	5.9	26.8	9.1	3.2	25.5	19.6	5.9	3.6	14.1176	3.6	18.3673	0
October 2nd	Warm	Warm	21	9	0	180	Upper	Hard	Purple siltstone	1	3	Intermediate	11.6	424	0.91	0	10R 5/1	Reddish grey	39.6	30.8	8.8	36.7	18.6	9.8	37.4	27.1	10.3	2.2	5.88235	3.7	13.6531	-1.5
October 2nd	Warm	Warm	21	9	0	180	Upper	Soft	Orange limestone	5	21	Thick	12.4	676	0.88	1	2.5Y 8/4	Pale yellow	34.5	23.4	11.1	29.2	13.5	2.4	32.2	20.2	12	2.3	7.14286	3.2	15.8416	-0.9
October 2nd	Warm	Warm	21	9	0	180	Upper	Hard	Quartzite	3	25	Thin	9.6	636	0.87	0	10YR 6/2	Greyish yellow brown	34.7	26.8	7.9	30	13.7	5.8	30.8	22.5	8.3	3.9	12.6623	4.3	19.1111	-0.4
October 2nd	Warm	Warm	21	9	0	180	Upper	Soft	Fossiliferous sandstone	4	33	Intermediate	8.6	672	0.85	0	2.5Y 6/4	Dull yellow	38.8	29.4	9.4	34.9	17.8	8.4	35.8	24.4	11.4	3	8.37989	5	20.4918	-2
October 2nd	Warm	Warm	21	9	0	180	Upper	Hard	Grey siltstone	2	12	Thin	7.5	580	0.95	0	N 6/0	Grey	41.8	35.7	6.1	38.6	20.8	14.7	38.1	31.3	6.8	3.7	9.71129	4.4	14.0575	-0.7
October 2nd	Warm	Warm	21	9	0	180	Upper	Soft	Orange limestone	5	20	Thick	11.7	356	0.92	0	10YR 8/3	Light yellow	34.4	25.9	8.5	31.7	13.4	4.9	30.5	17.5	13	3.9	12.7869	8.4	48	-4.5
October 2nd	Warm	Warm	21	9	0	180	Upper	Hard	Quartzite	3	29	Thick	14.1	400	0.94	1	10YR 7/2	Greyish yellow brown	31.7	23.8	7.9	30.5	10.7	2.8	28.2	21.2	7	3.5	12.4113	2.6	12.2642	0.9
October 2nd	Warm	Warm	21	9	0	180	Upper	Soft	White limestone	6	16	Thick	12.3	460	0.94	1	2.5Y 8/1	Light grey	33.4	26.4	7	29.6	12.4	5.4	31.6	18.1	13.5	1.8	5.6962	8.3	45.8564	-6.5
October 2nd	Warm	Warm	21	9	0	180	Upper	Hard	Grey siltstone	2	9	Thick	12.6	624	0.92	0	2.5GY 7/1	Light olive grey	39.1	29.6	9.5	35.1	18.1	8.6	36.1	24.8	11.3	3	8.31025	4.8	19.3548	-1.8
October 2nd	Warm	Warm	21	9	0	180	Upper	Hard	Quartzite	3	30	Thick	14.3	376	0.96	0	10YR 8/1	Light grey	30.3	21.8	8.5	25.7	9.3	0.8	26.5	19.6	6.9	3.8	14.3396	2.2	11.2245	1.6
October 2nd	Warm	Warm	21	9	0	180	Upper	Hard	Purple siltstone	1	4	Thin	6.4	608	0.94	0	10R 6/1	Reddish grey	35.6	28.5	7.1	32.6	14.6	7.5	32.2	23.8	8.4	3.4	10.559	4.7	19.7479	-1.3
October 2nd	Warm	Warm	21	9	0	180	Upper	Soft	Fossiliferous sandstone	4	36	Thin	7.5	732	0.86	0	2.5Y 7/4	Light yellow	36.5	27.2	9.3	32.2	15.5	6.2	34.4	22.4	12	2.1	6.10465	4.8	21.4286	-2.7
October 2nd	Warm	Warm	21	9	0	180	Upper	Soft	Fossiliferous sandstone	4	31	Thin	6.9	588	0.94	0	2.5Y 7/6	Yellowish brown	38	28.3	9.7	34.7	17	7.3	36.2	24.7	11.5	1.8	4.97238	3.6	14.5749	-1.8
October 2nd	Warm	Warm	21	9	0	180	Upper	Soft	White limestone	6	15	Thin	5.9	612	0.82	1	2.5Y 8/1	Light grey	33.7	26.8	6.9	29.6	12.7	5.8	31.4	21.9	9.5	2.3	7.32484	4.9	22.3744	-2.6
October 2nd	Warm	Warm	21	9	0	180	Upper	Soft	Orange limestone	5	22	Intermediate	7.6	632	0.94	0	2.5Y 7/4	Light yellow	37.2	29.3	7.9	33.8	16.2	8.3	35.3	24.7	10.6	1.9	5.38244	4.6	18.6235	-2.7
October 2nd	Warm	Warm	21	9	0	180	Upper	Hard	Grey siltstone	2	7	Thick	12.3	436	0.94	0	N 7/0	Greyish white	37.7	29	8.7	35.4	16.7	8	35.5	26.8	8.7	2.2	6.19718	2.2	8.20896	0
October 2nd	Warm	Warm	21	9	0	180	Upper	Soft	Orange limestone	5	23	Thin	6.1	808	0.91	0	5Y 8/3	Pale yellow	34.8	28.2	6.6	31.7	13.8	7.2	32.8	24.6	8.2	2	6.09756	3.6	14.6341	-1.6
October 2nd	Warm	Warm	21	9	0	180	Upper	Hard	Purple siltstone	1	2	Thick	14.3	484	0.97	0	7.5YR 5/1	Brownish grey	40	31.6	8.4	36.1	19	10.6	38.2	26.5	11.7	1.8	4.71204	5.1	19.2453	-3.3
October 2nd	Warm	Warm	21	9	0	180	Upper	Soft	White limestone	6	13	Intermediate	9.4	592	0.91	2	2.5Y 8/1	Light grey	32.8	24.2	8.6	29.1	11.8	3.2	30.9	21.9	9	1.9	6.14887	2.3	10.5023	-0.4
October 2nd	Warm	Warm	21	9	0	180	Upper	Hard	Grey siltstone	2	11	Thin	7.3	688	0.94	0	N 7/0	Greyish white	40.2	30.1	10.1	37.9	19.2	9.1	37.8	27.3	10.5	2.4	6.34921	2.8	10.2564	-0.4
October 2nd	Warm	Warm	21	9	0	180	Upper	Hard	Purple siltstone	1	1	Intermediate	11.2	384	0.92	0	2.5YR 5/1	Reddish grey	40.1	32.4	7.7	37.8	19.1	11.4	37.1	29.1	8	3	8.08625	3.3	11.3402	-0.3
October 2nd	Warm	Warm	21	9	0	180	Upper	Hard	Grey siltstone	2	10	Intermediate	8.4	552	0.94	0	2.5GY 7/1	Light olive grey	38.2	32.3	5.9	35.4	17.2	11.3	35.1	27.2	7.9	3.1	8.83191	5.1	18.75	-2
October 2nd	Warm	Warm	21	9	0	180	Upper	Soft	Orange limestone	5	19	Intermediate	6.8	604	0.94	0	2.5Y 6/4	Dull yellow	36.6	28.8	7.8	32.5	15.6	7.8	33.5	23	10.5	3.1	9.25373	5.8	25.2174	-2.7
October 2nd	Warm	Warm	21	9	0	180	Upper	Soft	White limestone	6	14	Thin	6.5	830	0.97	4	2.5Y 8/1	Light grey	34	26.5	7.5	30.7	13	5.5	31.5	19.9	11.6	2.5	7.93651	6.6	33.1658	-4.1
October 2nd	Warm	Warm	21	9	0	180	Upper	Soft	Fossiliferous sandstone	4	35	Thick	15	704	0.91	0	2.5Y 5/6	Yellowish brown	38.8	34.5	4.3	36.7	17.8	13.5	36.6	29.7	6.9	2.2	6.01093	4.8	16.1616	-2.6
October 2nd	Warm	Warm	21	9	0	180	Upper	Hard	Purple siltstone	1	5	Thin	6.5	508	0.92	0	10R 6/1	Reddish grey	39.8	30.3	9.5	37.2	18.8	9.3	37.4	27.8	9.6	2.4	6.41711	2.5	8.99281	-0.1
October 2nd	Warm	Warm	21	9	0	180	Upper	Hard	Quartzite	3	28	Intermediate	12.6	328	0.95	0	10YR 8/1	Light grey	28.2	22.5	5.7	24.5	7.2	1.5	25.7	20.9	4.8	2.5	9.72763	1.6	7.6555	0.9
October 2nd	Warm	Warm	21	9	0	180	Upper	Soft	Orange limestone	5	24	Thin	6	620	0.94	0	2.5Y 7/4	Light yellow	36.8	27.7	9.1	33.7	15.8	6.7	32.8	24.3	8.5	4	12.1951	3.4	13.9918	0.6
October 2nd	Warm	Warm	21	9	0	180	Upper	Hard	Quartzite	3	27	Intermediate	11.1	444	0.94	0	10YR 8/1	Light grey	28.3	24.6	3.7	27.5	7.3	3.6	25.5	20	5.5	2.8	10.9804	4.6	23	-1.8
October 2nd	Warm	Warm	21	9	0	180	Upper	Soft	White limestone	6	18	Thick	12	544	0.85	1	2.5Y 8/1	Light grey	34.3	27.1	7.2	28.1	13.3	6.1	31.3	20.5	10.8	3	9.58466	6.6	32.1951	-3.6
October 2nd	Warm	Warm	21	9	0	180	Upper	Soft	Fossiliferous sandstone	4	34	Thick	13.9	436	0.76	0	2.5Y 7/4	Light yellow	37.8	27.9	9.9	36	16.8	6.9	34	23.3	10.7	3.8	11.1765	4.6	19.7425	-0.8
October 2nd	Warm	Warm	21	9	0	180	Upper	Hard	Purple siltstone	1	6	Thick	13.5	596	0.94	0	7.5R 5/1	Reddish grey	41.2	30.2	11	38.3	20.2	9.2	36.6	26.5	10.1	4.6	12.5683	3.7	13.9623	0.9
October 2nd	Warm	Warm	21	9	0	180	Upper	Hard	Quartzite	3	26	Thin	7.9	500	0.97	0	10YR 7/2	Greyish yellow brown	33.6	25.8	7.8	28.2	12.6	4.8	30	23.6	6.4	3.6	12	2.2	9.32203	1.4
October 2nd	Warm	Warm	21	9	0	180	Upper	Soft	White limestone	6	17	Intermediate	9.5	444	0.95	0	2.5Y 8/1	Light grey	32.7	24.8	7.9	29.5	11.7	3.8	29.8	21.3	8.5	2.9	9.73154	3.5	16.4319	-0.6
October 2nd	Warm	Warm	21	9	0	180	Upper	Hard	Grey siltstone	2	8	Intermediate	8.1	592	0.97	0	2.5GY 6/1	Olive grey	39.9	31.3	8.6	36.8	18.9	10.3	36.7	26	10.7	3.2	8.71935	5.3	20.3846	-2.1
October 2nd	Warm	Warm	21	9	0	180	Upper	Soft	Fossiliferous sandstone	4	32	Intermediate	7.9	524	0.92	0	2.5Y 7/4	Light yellow	37	29.3	7.7	32.6	16	8.3	33.4	25.2	8.2	3.6	10.7784	4.1	16.2698	-0.5
October 2nd	Warm	Warm	21	9	0	180	Lower	Hard	Purple siltstone	1	3	Intermediate	11.6	354	0.91	0	10R 5/1	Reddish grey	35.1	25.2	9.9	29.3	14.1	4.2	30.7	21.2	9.5	4.4	14.3322	4	18.8679	0.4
October 2nd	Warm	Warm	21	9	0	180	Lower	Soft	Orange limestone	5	21	Thick	12.4	608	0.91	0	2.5Y 8/4	Pale yellow	27.8	18.5	9.3	20.7	6.8	-2.5	24.6	15.8	8.8	3.2	13.0081	2.7	17.0886	0.5
October 2nd	Warm	Warm	21	9	0	180	Lower	Hard	Quartzite	3	25	Thin	9.6	584	0.92	0	10YR 6/2	Greyish yellow brown	34.6	23.2	11.4	26.3	13.6	2.2	33.2	19.8	13.4	1.4	4.21687	3.4	17.1717	-2
October 2nd	Warm	Warm	21	9	0	180	Lower	Soft	Fossiliferous sandstone	4	33	Intermediate	8.6	680	0.91	0	2.5Y 6/4	Dull yellow	31.8	21.2	10.6	27.2	10.8	0.2	30.7	20.4	10.3	1.1	3.58306	0.8	3.92157	0.3
October 2nd	Warm	Warm	21	9	0	180	Lower	Hard	Grey siltstone	2	12	Thin	7.5	576	0.94	0	N 6/0	Grey	38.2	28.8	9.4	29.3	17.2	7.8	36.2	25.6	10.6	2	5.52486	3.2	12.5	-1.2
October 2nd	Warm	Warm	21	9	0	180	Lower	Soft	Orange limestone	5	20	Thick	11.7	420	0.97	0	10YR 8/3	Light yellow	27.2	18.7	8.5	19.4	6.2	-2.3	25.2	16.8	8.4	2	7.93651	1.9	11.3095	0.1
October 2nd	Warm	Warm	21	9	0	180	Lower	Hard	Quartzite	3	29	Thick	14.1	368	0.94	0	10YR 7/2	Greyish yellow brown	26.8	21.4	5.4	22.8	5.8	0.4	25.9	18.6	7.3	0.9	3.4749	2.8	15.0538	-1.9
October 2nd	Warm	Warm	21	9	0	180	Lower	Soft	White limestone	6	16	Thick	12.3	412	0.94	0	2.5Y 8/1	Light grey	26.8	20.4	6.4	21.4	5.8	-0.6	24.6	17.9	6.7	2.2	8.94309	2.5	13.9665	-0.3
October 2nd	Warm	Warm	21	9	0	180	Lower	Hard	Grey siltstone	2	9	Thick	12.6	532	0.97	0	2.5GY 7/1	Light olive grey	31.8	25.9	5.9	26.9	10.8	4.9	27	21.7	5.3	4.8	17.7778	4.2	19.3548	0.6
October 2nd	Warm	Warm	21	9	0	180	Lower	Hard	Quartzite	3	30	Thick	14.3	588	0.9	0	10YR 8/1	Light grey	29.4	20.5	8.9	22.2	8.4	-0.5	27.4	18.7	8.7	2	7.29927	1.8	9.62567	0.2
October 2nd	Warm	Warm	21	9	0	180	Lower	Hard	Purple siltstone	1	4	Thin	6.4	608	0.95	0	10R 6/1	Reddish grey	35	27.3	7.7	29.3	14	6.3	30.7	23.8	6.9	4.3	14.0065	3.5	14.7059	0.8
October 2nd	Warm	Warm	21	9	0	180	Lower	Soft	Fossiliferous sandstone	4	36	Thin	7.5	742	0.88	1	2.5Y 7/4	Light yellow	36.9	27	9.9	28.7	15.9	6	32.4	22.8	9.6	4.5	13.8889	4.2	18.4211	0.3
October 2nd	Warm	Warm	21	9	0	180	Lower	Soft	Fossiliferous sandstone	4	31	Thin	6.9	580	0.94	0	2.5Y 7/6	Yellowish brown	37.1	25.2	11.9	29	16.1	4.2	30.1	22.8	7.3	7	23.2558	2.4	10.5263	4.6
October 2nd	Warm	Warm	21	9	0	180	Lower	Soft	White limestone	6	15	Thin	5.9	564	0.92	2	2.5Y 8/1	Light grey	35.3	23.7	11.6	25.3	14.3	2.7	33.2	20.5	12.7	2.1	6.3253	3.2	15.6098	-1.1
October 2nd	Warm	Warm	21	9	0	180	Lower	Soft	Orange limestone	5	22	Intermediate	7.6	584	0.94	0	2.5Y 7/4	Light yellow	31.8	24.8	7	26.2	10.8	3.8	29	21.7	7.3	2.8	9.65517	3.1	14.2857	-0.3
October 2nd	Warm	Warm	21	9	0	180	Lower	Hard	Grey siltstone	2	7	Thick	12.3	544	0.95	0	N 7/0	Greyish white	31	26	5	27.8	10	5	30.9	23.8	7.1	0.1	0.323625	2.2	9.2437	-2.1
October 2nd	Warm	Warm	21	9	0	180	Lower	Soft	Orange limestone	5	23	Thin	6.1	792	0.94	0	5Y 8/3	Pale yellow	35.9	26.4	9.5	26.8	14.9	5.4	32	22.1	9.9	3.9	12.1875	4.3	19.457	-0.4
October 2nd	Warm	Warm	21	9	0	180	Lower	Hard	Purple siltstone	1	2	Thick	14.3	456	0.94	0	7.5YR 5/1	Brownish grey	31.9	26.8	5.1	29.5	10.9	5.8	28.2	22.7	5.5	3.7	13.1206	4.1	18.0617	-0.4
October 2nd	Warm	Warm	21	9	0	180	Lower	Soft	White limestone	6	13	Intermediate	9.4	492	0.91	2	2.5Y 8/1	Light grey	29.6	21.9	7.7	25.9	8.6	0.9	26.5	19.3	7.2	3.1	11.6981	2.6	13.4715	0.5
October 2nd	Warm	Warm	21	9	0	180	Lower	Hard	Grey siltstone	2	11	Thin	7.3	696	0.92	0	N 7/0	Greyish white	39.4	28	11.4	30.3	18.4	7	37.3	25.7	11.6	2.1	5.63003	2.3	8.94942	-0.2
October 2nd	Warm	Warm	21	9	0	180	Lower	Hard	Purple siltstone	1	1	Intermediate	11.2	408	0.94	0	2.5YR 5/1	Reddish grey	39.4	29.6	9.8	31.4	18.4	8.6	37.3	27.8	9.5	2.1	5.63003	1.8	6.47482	0.3
October 2nd	Warm	Warm	21	9	0	180	Lower	Hard	Grey siltstone	2	10	Intermediate	8.4	556	0.94	0	2.5GY 7/1	Light olive grey	38.6	30.3	8.3	31.3	17.6	9.3	35	26.2	8.8	3.6	10.2857	4.1	15.6489	-0.5
October 2nd	Warm	Warm	21	9	0	180	Lower	Soft	Orange limestone	5	19	Intermediate	6.8	528	0.92	0	2.5Y 6/4	Dull yellow	35.9	26.7	9.2	28.1	14.9	5.7	31	23.2	7.8	4.9	15.8065	3.5	15.0862	1.4
October 2nd	Warm	Warm	21	9	0	180	Lower	Soft	White limestone	6	14	Thin	6.5	816	0.95	2	2.5Y 8/1	Light grey	29.5	23.2	6.3	24.1	8.5	2.2	33	21.8	11.2	-3.5	-10.6061	1.4	6.42202	-4.9
October 2nd	Warm	Warm	21	9	0	180	Lower	Soft	Fossiliferous sandstone	4	35	Thick	15	664	0.91	1	2.5Y 5/6	Yellowish brown	32.8	23.9	8.9	26.4	11.8	2.9	29	21.4	7.6	3.8	13.1034	2.5	11.6822	1.3
October 2nd	Warm	Warm	21	9	0	180	Lower	Hard	Purple siltstone	1	5	Thin	6.5	496	0.97	0	10R 6/1	Reddish grey	39.2	31.5	7.7	32.6	18.2	10.5	35.3	29.3	6	3.9	11.0482	2.2	7.50853	1.7
October 2nd	Warm	Warm	21	9	0	180	Lower	Hard	Quartzite	3	28	Intermediate	12.6	464	0.92	0	10YR 8/1	Light grey	31	23.3	7.7	25	10	2.3	27.6	21.3	6.3	3.4	12.3188	2	9.38967	1.4
October 2nd	Warm	Warm	21	9	0	180	Lower	Soft	Orange limestone	5	24	Thin	6	588	0.94	1	2.5Y 7/4	Light yellow	32.7	25.5	7.2	29.6	11.7	4.5	31.7	23	8.7	1	3.15457	2.5	10.8696	-1.5
October 2nd	Warm	Warm	21	9	0	180	Lower	Hard	Quartzite	3	27	Intermediate	11.1	448	0.94	0	10YR 8/1	Light grey	30.6	24.8	5.8	26.8	9.6	3.8	27	21.5	5.5	3.6	13.3333	3.3	15.3488	0.3
October 2nd	Warm	Warm	21	9	0	180	Lower	Soft	White limestone	6	18	Thick	12	504	0.81	0	2.5Y 8/1	Light grey	29.1	21.4	7.7	22.4	8.1	0.4	27.2	19.2	8	1.9	6.98529	2.2	11.4583	-0.3
October 2nd	Warm	Warm	21	9	0	180	Lower	Soft	Fossiliferous sandstone	4	34	Thick	13.9	520	0.95	0	2.5Y 7/4	Light yellow	32	25	7	26.5	11	4	29.6	21.8	7.8	2.4	8.10811	3.2	14.6789	-0.8
October 2nd	Warm	Warm	21	9	0	180	Lower	Hard	Purple siltstone	1	6	Thick	13.5	516	1	0	7.5R 5/1	Reddish grey	36.1	29.3	6.8	30.9	15.1	8.3	30.5	23.9	6.6	5.6	18.3607	5.4	22.5941	0.2
October 2nd	Warm	Warm	21	9	0	180	Lower	Hard	Quartzite	3	26	Thin	7.9	496	0.94	0	10YR 7/2	Greyish yellow brown	33.9	27.7	6.2	31.7	12.9	6.7	30.3	24.2	6.1	3.6	11.8812	3.5	14.4628	0.1
October 2nd	Warm	Warm	21	9	0	180	Lower	Soft	White limestone	6	17	Intermediate	9.5	448	0.92	1	2.5Y 8/1	Light grey	31.4	23.7	7.7	26.3	10.4	2.7	27.1	19.8	7.3	4.3	15.8672	3.9	19.697	0.4
October 2nd	Warm	Warm	21	9	0	180	Lower	Hard	Grey siltstone	2	8	Intermediate	8.1	584	0.97	0	2.5GY 6/1	Olive grey	39	31.7	7.3	34.3	18	10.7	35.7	27.1	8.6	3.3	9.2437	4.6	16.9742	-1.3
October 2nd	Warm	Warm	21	9	0	180	Lower	Soft	Fossiliferous sandstone	4	32	Intermediate	7.9	536	0.91	0	2.5Y 7/4	Light yellow	30.7	26.7	4	29.3	9.7	5.7	29.1	23.2	5.9	1.6	5.49828	3.5	15.0862	-1.9
October 2nd	Warm	Warm	24	9	0	240	Upper	Hard	Purple siltstone	1	3	Intermediate	11.6	424	0.91	0	10R 5/1	Reddish grey	42.8	33.3	9.5	38.6	18.8	9.3	39.6	30.8	8.8	3.2	8.08081	2.5	8.11688	0.7
October 2nd	Warm	Warm	24	9	0	240	Upper	Soft	Orange limestone	5	21	Thick	12.4	676	0.88	1	2.5Y 8/4	Pale yellow	36.3	27.6	8.7	32.2	12.3	3.6	34.5	23.4	11.1	1.8	5.21739	4.2	17.9487	-2.4
October 2nd	Warm	Warm	24	9	0	240	Upper	Hard	Quartzite	3	25	Thin	9.6	636	0.87	0	10YR 6/2	Greyish yellow brown	37.2	28.6	8.6	32.1	13.2	4.6	34.7	26.8	7.9	2.5	7.20461	1.8	6.71642	0.7
October 2nd	Warm	Warm	24	9	0	240	Upper	Soft	Fossiliferous sandstone	4	33	Intermediate	8.6	672	0.85	0	2.5Y 6/4	Dull yellow	40.3	30.3	10	36.7	16.3	6.3	38.8	29.4	9.4	1.5	3.86598	0.9	3.06122	0.6
October 2nd	Warm	Warm	24	9	0	240	Upper	Hard	Grey siltstone	2	12	Thin	7.5	580	0.95	0	N 6/0	Grey	44.2	35.9	8.3	40.6	20.2	11.9	41.8	35.7	6.1	2.4	5.74163	0.2	0.560224	2.2
October 2nd	Warm	Warm	24	9	0	240	Upper	Soft	Orange limestone	5	20	Thick	11.7	356	0.92	0	10YR 8/3	Light yellow	36.8	27	9.8	32.4	12.8	3	34.4	25.9	8.5	2.4	6.97674	1.1	4.2471	1.3
October 2nd	Warm	Warm	24	9	0	240	Upper	Hard	Quartzite	3	29	Thick	14.1	400	0.94	1	10YR 7/2	Greyish yellow brown	35.8	27.3	8.5	32.3	11.8	3.3	31.7	23.8	7.9	4.1	12.9338	3.5	14.7059	0.6
October 2nd	Warm	Warm	24	9	0	240	Upper	Soft	White limestone	6	16	Thick	12.3	460	0.94	1	2.5Y 8/1	Light grey	35.2	29.2	6	33	11.2	5.2	33.4	26.4	7	1.8	5.38922	2.8	10.6061	-1
October 2nd	Warm	Warm	24	9	0	240	Upper	Hard	Grey siltstone	2	9	Thick	12.6	624	0.92	0	2.5GY 7/1	Light olive grey	40.4	32.3	8.1	37.1	16.4	8.3	39.1	29.6	9.5	1.3	3.32481	2.7	9.12162	-1.4
October 2nd	Warm	Warm	24	9	0	240	Upper	Hard	Quartzite	3	30	Thick	14.3	376	0.96	0	10YR 8/1	Light grey	32	23.5	8.5	27.1	8	-0.5	30.3	21.8	8.5	1.7	5.61056	1.7	7.79817	0
October 2nd	Warm	Warm	24	9	0	240	Upper	Hard	Purple siltstone	1	4	Thin	6.4	608	0.94	0	10R 6/1	Reddish grey	38.6	30.9	7.7	35	14.6	6.9	35.6	28.5	7.1	3	8.42697	2.4	8.42105	0.6
October 2nd	Warm	Warm	24	9	0	240	Upper	Soft	Fossiliferous sandstone	4	36	Thin	7.5	732	0.86	0	2.5Y 7/4	Light yellow	38	29.4	8.6	34.2	14	5.4	36.5	27.2	9.3	1.5	4.10959	2.2	8.08824	-0.7
October 2nd	Warm	Warm	24	9	0	240	Upper	Soft	Fossiliferous sandstone	4	31	Thin	6.9	588	0.94	0	2.5Y 7/6	Yellowish brown	40.8	31.2	9.6	38.1	16.8	7.2	38	28.3	9.7	2.8	7.36842	2.9	10.2473	-0.1
October 2nd	Warm	Warm	24	9	0	240	Upper	Soft	White limestone	6	15	Thin	5.9	612	0.82	1	2.5Y 8/1	Light grey	36.2	28.7	7.5	31.7	12.2	4.7	33.7	26.8	6.9	2.5	7.4184	1.9	7.08955	0.6
October 2nd	Warm	Warm	24	9	0	240	Upper	Soft	Orange limestone	5	22	Intermediate	7.6	632	0.94	0	2.5Y 7/4	Light yellow	39.3	31.1	8.2	36.7	15.3	7.1	37.2	29.3	7.9	2.1	5.64516	1.8	6.14334	0.3
October 2nd	Warm	Warm	24	9	0	240	Upper	Hard	Grey siltstone	2	7	Thick	12.3	436	0.94	0	N 7/0	Greyish white	41.2	30.5	10.7	38.4	17.2	6.5	37.7	29	8.7	3.5	9.28382	1.5	5.17241	2
October 2nd	Warm	Warm	24	9	0	240	Upper	Soft	Orange limestone	5	23	Thin	6.1	808	0.91	0	5Y 8/3	Pale yellow	36.8	29.9	6.9	34	12.8	5.9	34.8	28.2	6.6	2	5.74713	1.7	6.02837	0.3
October 2nd	Warm	Warm	24	9	0	240	Upper	Hard	Purple siltstone	1	2	Thick	14.3	484	0.97	0	7.5YR 5/1	Brownish grey	42.1	33	9.1	38.5	18.1	9	40	31.6	8.4	2.1	5.25	1.4	4.43038	0.7
October 2nd	Warm	Warm	24	9	0	240	Upper	Soft	White limestone	6	13	Intermediate	9.4	592	0.91	2	2.5Y 8/1	Light grey	34.7	26.1	8.6	30.6	10.7	2.1	32.8	24.2	8.6	1.9	5.79268	1.9	7.85124	0
October 2nd	Warm	Warm	24	9	0	240	Upper	Hard	Grey siltstone	2	11	Thin	7.3	688	0.94	0	N 7/0	Greyish white	41.1	31.1	10	39.6	17.1	7.1	40.2	30.1	10.1	0.9	2.23881	1	3.32226	-0.1
October 2nd	Warm	Warm	24	9	0	240	Upper	Hard	Purple siltstone	1	1	Intermediate	11.2	384	0.92	0	2.5YR 5/1	Reddish grey	41.5	34.2	7.3	38.7	17.5	10.2	40.1	32.4	7.7	1.4	3.49127	1.8	5.55556	-0.4
October 2nd	Warm	Warm	24	9	0	240	Upper	Hard	Grey siltstone	2	10	Intermediate	8.4	552	0.94	0	2.5GY 7/1	Light olive grey	39.4	31.5	7.9	36.8	15.4	7.5	38.2	32.3	5.9	1.2	3.14136	-0.8	-2.47678	2
October 2nd	Warm	Warm	24	9	0	240	Upper	Soft	Orange limestone	5	19	Intermediate	6.8	604	0.94	0	2.5Y 6/4	Dull yellow	38	32.8	5.2	35.2	14	8.8	36.6	28.8	7.8	1.4	3.82514	4	13.8889	-2.6
October 2nd	Warm	Warm	24	9	0	240	Upper	Soft	White limestone	6	14	Thin	6.5	830	0.97	4	2.5Y 8/1	Light grey	36	30.4	5.6	33.8	12	6.4	34	26.5	7.5	2	5.88235	3.9	14.717	-1.9
October 2nd	Warm	Warm	24	9	0	240	Upper	Soft	Fossiliferous sandstone	4	35	Thick	15	704	0.91	0	2.5Y 5/6	Yellowish brown	41.6	35.6	6	40.3	17.6	11.6	38.8	34.5	4.3	2.8	7.21649	1.1	3.18841	1.7
October 2nd	Warm	Warm	24	9	0	240	Upper	Hard	Purple siltstone	1	5	Thin	6.5	508	0.92	0	10R 6/1	Reddish grey	42.6	29.8	12.8	39.4	18.6	5.8	39.8	30.3	9.5	2.8	7.03518	-0.5	-1.65017	3.3
October 2nd	Warm	Warm	24	9	0	240	Upper	Hard	Quartzite	3	28	Intermediate	12.6	328	0.95	0	10YR 8/1	Light grey	30.1	21.4	8.7	25.6	6.1	-2.6	28.2	22.5	5.7	1.9	6.73759	-1.1	-4.88889	3
October 2nd	Warm	Warm	24	9	0	240	Upper	Soft	Orange limestone	5	24	Thin	6	620	0.94	0	2.5Y 7/4	Light yellow	38.6	30.8	7.8	35.1	14.6	6.8	36.8	27.7	9.1	1.8	4.8913	3.1	11.1913	-1.3
October 2nd	Warm	Warm	24	9	0	240	Upper	Hard	Quartzite	3	27	Intermediate	11.1	444	0.94	0	10YR 8/1	Light grey	30.9	26.5	4.4	28.8	6.9	2.5	28.3	24.6	3.7	2.6	9.18728	1.9	7.72358	0.7
October 2nd	Warm	Warm	24	9	0	240	Upper	Soft	White limestone	6	18	Thick	12	544	0.85	1	2.5Y 8/1	Light grey	35.6	29.4	6.2	32.1	11.6	5.4	34.3	27.1	7.2	1.3	3.79009	2.3	8.48708	-1
October 2nd	Warm	Warm	24	9	0	240	Upper	Soft	Fossiliferous sandstone	4	34	Thick	13.9	436	0.76	0	2.5Y 7/4	Light yellow	39.5	30.4	9.1	37.8	15.5	6.4	37.8	27.9	9.9	1.7	4.49735	2.5	8.96057	-0.8
October 2nd	Warm	Warm	24	9	0	240	Upper	Hard	Purple siltstone	1	6	Thick	13.5	596	0.94	0	7.5R 5/1	Reddish grey	43.8	34.2	9.6	40.8	19.8	10.2	41.2	30.2	11	2.6	6.31068	4	13.245	-1.4
October 2nd	Warm	Warm	24	9	0	240	Upper	Hard	Quartzite	3	26	Thin	7.9	500	0.97	0	10YR 7/2	Greyish yellow brown	34.4	26.3	8.1	28.4	10.4	2.3	33.6	25.8	7.8	0.8	2.38095	0.5	1.93798	0.3
October 2nd	Warm	Warm	24	9	0	240	Upper	Soft	White limestone	6	17	Intermediate	9.5	444	0.95	0	2.5Y 8/1	Light grey	33.7	25.9	7.8	30.7	9.7	1.9	32.7	24.8	7.9	1	3.0581	1.1	4.43548	-0.1
October 2nd	Warm	Warm	24	9	0	240	Upper	Hard	Grey siltstone	2	8	Intermediate	8.1	592	0.97	0	2.5GY 6/1	Olive grey	40.3	32.9	7.4	38.2	16.3	8.9	39.9	31.3	8.6	0.4	1.00251	1.6	5.11182	-1.2
October 2nd	Warm	Warm	24	9	0	240	Upper	Soft	Fossiliferous sandstone	4	32	Intermediate	7.9	524	0.92	0	2.5Y 7/4	Light yellow	37.8	30.9	6.9	33.6	13.8	6.9	37	29.3	7.7	0.8	2.16216	1.6	5.46075	-0.8
October 2nd	Warm	Warm	24	9	0	240	Lower	Hard	Purple siltstone	1	3	Intermediate	11.6	354	0.91	0	10R 5/1	Reddish grey	36.7	27.2	9.5	32.9	12.7	3.2	35.1	25.2	9.9	1.6	4.5584	2	7.93651	-0.4
October 2nd	Warm	Warm	24	9	0	240	Lower	Soft	Orange limestone	5	21	Thick	12.4	608	0.91	0	2.5Y 8/4	Pale yellow	29	20.3	8.7	22.2	5	-3.7	27.8	18.5	9.3	1.2	4.31655	1.8	9.72973	-0.6
October 2nd	Warm	Warm	24	9	0	240	Lower	Hard	Quartzite	3	25	Thin	9.6	584	0.92	0	10YR 6/2	Greyish yellow brown	35.1	23.7	11.4	29.1	11.1	-0.3	34.6	23.2	11.4	0.5	1.44509	0.5	2.15517	0
October 2nd	Warm	Warm	24	9	0	240	Lower	Soft	Fossiliferous sandstone	4	33	Intermediate	8.6	680	0.91	0	2.5Y 6/4	Dull yellow	33.7	24	9.7	29.9	9.7	0	31.8	21.2	10.6	1.9	5.97484	2.8	13.2075	-0.9
October 2nd	Warm	Warm	24	9	0	240	Lower	Hard	Grey siltstone	2	12	Thin	7.5	576	0.94	0	N 6/0	Grey	40.4	30.7	9.7	31	16.4	6.7	38.2	28.8	9.4	2.2	5.75916	1.9	6.59722	0.3
October 2nd	Warm	Warm	24	9	0	240	Lower	Soft	Orange limestone	5	20	Thick	11.7	420	0.97	0	10YR 8/3	Light yellow	27.7	19.8	7.9	20.8	3.7	-4.2	27.2	18.7	8.5	0.5	1.83824	1.1	5.88235	-0.6
October 2nd	Warm	Warm	24	9	0	240	Lower	Hard	Quartzite	3	29	Thick	14.1	368	0.94	0	10YR 7/2	Greyish yellow brown	29.4	23.1	6.3	25.8	5.4	-0.9	26.8	21.4	5.4	2.6	9.70149	1.7	7.94393	0.9
October 2nd	Warm	Warm	24	9	0	240	Lower	Soft	White limestone	6	16	Thick	12.3	412	0.94	0	2.5Y 8/1	Light grey	28.5	21.6	6.9	24.1	4.5	-2.4	26.8	20.4	6.4	1.7	6.34328	1.2	5.88235	0.5
October 2nd	Warm	Warm	24	9	0	240	Lower	Hard	Grey siltstone	2	9	Thick	12.6	532	0.97	0	2.5GY 7/1	Light olive grey	34.3	27.8	6.5	30.6	10.3	3.8	31.8	25.9	5.9	2.5	7.86164	1.9	7.33591	0.6
October 2nd	Warm	Warm	24	9	0	240	Lower	Hard	Quartzite	3	30	Thick	14.3	588	0.9	0	10YR 8/1	Light grey	30.4	23.1	7.3	25.8	6.4	-0.9	29.4	20.5	8.9	1	3.40136	2.6	12.6829	-1.6
October 2nd	Warm	Warm	24	9	0	240	Lower	Hard	Purple siltstone	1	4	Thin	6.4	608	0.95	0	10R 6/1	Reddish grey	37.3	29	8.3	31.2	13.3	5	35	27.3	7.7	2.3	6.57143	1.7	6.22711	0.6
October 2nd	Warm	Warm	24	9	0	240	Lower	Soft	Fossiliferous sandstone	4	36	Thin	7.5	742	0.88	1	2.5Y 7/4	Light yellow	37.2	28.7	8.5	29.2	13.2	4.7	36.9	27	9.9	0.3	0.813008	1.7	6.2963	-1.4
October 2nd	Warm	Warm	24	9	0	240	Lower	Soft	Fossiliferous sandstone	4	31	Thin	6.9	580	0.94	0	2.5Y 7/6	Yellowish brown	38.9	26.8	12.1	32.2	14.9	2.8	37.1	25.2	11.9	1.8	4.85175	1.6	6.34921	0.2
October 2nd	Warm	Warm	24	9	0	240	Lower	Soft	White limestone	6	15	Thin	5.9	564	0.92	2	2.5Y 8/1	Light grey	36.8	25	11.8	26.7	12.8	1	35.3	23.7	11.6	1.5	4.24929	1.3	5.48523	0.2
October 2nd	Warm	Warm	24	9	0	240	Lower	Soft	Orange limestone	5	22	Intermediate	7.6	584	0.94	0	2.5Y 7/4	Light yellow	32.7	27.2	5.5	28.7	8.7	3.2	31.8	24.8	7	0.9	2.83019	2.4	9.67742	-1.5
October 2nd	Warm	Warm	24	9	0	240	Lower	Hard	Grey siltstone	2	7	Thick	12.3	544	0.95	0	N 7/0	Greyish white	34.4	28.5	5.9	30.6	10.4	4.5	31	26	5	3.4	10.9677	2.5	9.61538	0.9
October 2nd	Warm	Warm	24	9	0	240	Lower	Soft	Orange limestone	5	23	Thin	6.1	792	0.94	0	5Y 8/3	Pale yellow	36.6	28	8.6	29.4	12.6	4	35.9	26.4	9.5	0.7	1.94986	1.6	6.06061	-0.9
October 2nd	Warm	Warm	24	9	0	240	Lower	Hard	Purple siltstone	1	2	Thick	14.3	456	0.94	0	7.5YR 5/1	Brownish grey	35.7	28.7	7	30.5	11.7	4.7	31.9	26.8	5.1	3.8	11.9122	1.9	7.08955	1.9
October 2nd	Warm	Warm	24	9	0	240	Lower	Soft	White limestone	6	13	Intermediate	9.4	492	0.91	2	2.5Y 8/1	Light grey	31.8	23.9	7.9	27.8	7.8	-0.1	29.6	21.9	7.7	2.2	7.43243	2	9.13242	0.2
October 2nd	Warm	Warm	24	9	0	240	Lower	Hard	Grey siltstone	2	11	Thin	7.3	696	0.92	0	N 7/0	Greyish white	38.8	30	8.8	31	14.8	6	39.4	28	11.4	-0.6	-1.52284	2	7.14286	-2.6
October 2nd	Warm	Warm	24	9	0	240	Lower	Hard	Purple siltstone	1	1	Intermediate	11.2	408	0.94	0	2.5YR 5/1	Reddish grey	39.8	30.9	8.9	32.4	15.8	6.9	39.4	29.6	9.8	0.4	1.01523	1.3	4.39189	-0.9
October 2nd	Warm	Warm	24	9	0	240	Lower	Hard	Grey siltstone	2	10	Intermediate	8.4	556	0.94	0	2.5GY 7/1	Light olive grey	39.3	31.8	7.5	32.9	15.3	7.8	38.6	30.3	8.3	0.7	1.81347	1.5	4.9505	-0.8
October 2nd	Warm	Warm	24	9	0	240	Lower	Soft	Orange limestone	5	19	Intermediate	6.8	528	0.92	0	2.5Y 6/4	Dull yellow	34.2	28.7	5.5	30	10.2	4.7	35.9	26.7	9.2	-1.7	-4.73538	2	7.49064	-3.7
October 2nd	Warm	Warm	24	9	0	240	Lower	Soft	White limestone	6	14	Thin	6.5	816	0.95	2	2.5Y 8/1	Light grey	36.4	24.6	11.8	25.8	12.4	0.6	29.5	23.2	6.3	6.9	23.3898	1.4	6.03448	5.5
October 2nd	Warm	Warm	24	9	0	240	Lower	Soft	Fossiliferous sandstone	4	35	Thick	15	664	0.91	1	2.5Y 5/6	Yellowish brown	40.3	26.2	14.1	30.2	16.3	2.2	32.8	23.9	8.9	7.5	22.8659	2.3	9.62343	5.2
October 2nd	Warm	Warm	24	9	0	240	Lower	Hard	Purple siltstone	1	5	Thin	6.5	496	0.97	0	10R 6/1	Reddish grey	40.6	33.8	6.8	34.6	16.6	9.8	39.2	31.5	7.7	1.4	3.57143	2.3	7.30159	-0.9
October 2nd	Warm	Warm	24	9	0	240	Lower	Hard	Quartzite	3	28	Intermediate	12.6	464	0.92	0	10YR 8/1	Light grey	31.1	24.3	6.8	25.6	7.1	0.3	31	23.3	7.7	0.1	0.322581	1	4.29185	-0.9
October 2nd	Warm	Warm	24	9	0	240	Lower	Soft	Orange limestone	5	24	Thin	6	588	0.94	1	2.5Y 7/4	Light yellow	33.5	27.6	5.9	29.8	9.5	3.6	32.7	25.5	7.2	0.8	2.44648	2.1	8.23529	-1.3
October 2nd	Warm	Warm	24	9	0	240	Lower	Hard	Quartzite	3	27	Intermediate	11.1	448	0.94	0	10YR 8/1	Light grey	30.3	25.5	4.8	27.7	6.3	1.5	30.6	24.8	5.8	-0.3	-0.980392	0.7	2.82258	-1
October 2nd	Warm	Warm	24	9	0	240	Lower	Soft	White limestone	6	18	Thick	12	504	0.81	0	2.5Y 8/1	Light grey	29.8	23.5	6.3	24.9	5.8	-0.5	29.1	21.4	7.7	0.7	2.4055	2.1	9.81308	-1.4
October 2nd	Warm	Warm	24	9	0	240	Lower	Soft	Fossiliferous sandstone	4	34	Thick	13.9	520	0.95	0	2.5Y 7/4	Light yellow	34.6	26.1	8.5	31	10.6	2.1	32	25	7	2.6	8.125	1.1	4.4	1.5
October 2nd	Warm	Warm	24	9	0	240	Lower	Hard	Purple siltstone	1	6	Thick	13.5	516	1	0	7.5R 5/1	Reddish grey	37.2	30	7.2	33	13.2	6	36.1	29.3	6.8	1.1	3.04709	0.7	2.38908	0.4
October 2nd	Warm	Warm	24	9	0	240	Lower	Hard	Quartzite	3	26	Thin	7.9	496	0.94	0	10YR 7/2	Greyish yellow brown	35.5	26.8	8.7	30.6	11.5	2.8	33.9	27.7	6.2	1.6	4.71976	-0.9	-3.2491	2.5
October 2nd	Warm	Warm	24	9	0	240	Lower	Soft	White limestone	6	17	Intermediate	9.5	448	0.92	1	2.5Y 8/1	Light grey	34	24.9	9.1	28.1	10	0.9	31.4	23.7	7.7	2.6	8.28025	1.2	5.06329	1.4
October 2nd	Warm	Warm	24	9	0	240	Lower	Hard	Grey siltstone	2	8	Intermediate	8.1	584	0.97	0	2.5GY 6/1	Olive grey	40.2	32.2	8	34.2	16.2	8.2	39	31.7	7.3	1.2	3.07692	0.5	1.57729	0.7
October 2nd	Warm	Warm	24	9	0	240	Lower	Soft	Fossiliferous sandstone	4	32	Intermediate	7.9	536	0.91	0	2.5Y 7/4	Light yellow	37.7	28.6	9.1	31.3	13.7	4.6	30.7	26.7	4	7	22.8013	1.9	7.1161	5.1
October 2nd	Warm	Warm	26	9	0	300	Upper	Hard	Purple siltstone	1	3	Intermediate	11.6	424	0.91	0	10R 5/1	Reddish grey	41.4	32.9	8.5	39.5	15.4	6.9	42.8	33.3	9.5	-1.4	-3.27103	-0.4	-1.2012	-1
October 2nd	Warm	Warm	26	9	0	300	Upper	Soft	Orange limestone	5	21	Thick	12.4	676	0.88	1	2.5Y 8/4	Pale yellow	37.2	28.1	9.1	33.3	11.2	2.1	36.3	27.6	8.7	0.9	2.47934	0.5	1.81159	0.4
October 2nd	Warm	Warm	26	9	0	300	Upper	Hard	Quartzite	3	25	Thin	9.6	636	0.87	0	10YR 6/2	Greyish yellow brown	36.3	30.4	5.9	32.3	10.3	4.4	37.2	28.6	8.6	-0.9	-2.41935	1.8	6.29371	-2.7
October 2nd	Warm	Warm	26	9	0	300	Upper	Soft	Fossiliferous sandstone	4	33	Intermediate	8.6	672	0.85	0	2.5Y 6/4	Dull yellow	40.1	28.4	11.7	36.5	14.1	2.4	40.3	30.3	10	-0.2	-0.496278	-1.9	-6.27063	1.7
October 2nd	Warm	Warm	26	9	0	300	Upper	Hard	Grey siltstone	2	12	Thin	7.5	580	0.95	0	N 6/0	Grey	41.8	32.9	8.9	38.5	15.8	6.9	44.2	35.9	8.3	-2.4	-5.42986	-3	-8.35655	0.6
October 2nd	Warm	Warm	26	9	0	300	Upper	Soft	Orange limestone	5	20	Thick	11.7	356	0.92	0	10YR 8/3	Light yellow	36.3	27.2	9.1	32.6	10.3	1.2	36.8	27	9.8	-0.5	-1.3587	0.2	0.740741	-0.7
October 2nd	Warm	Warm	26	9	0	300	Upper	Hard	Quartzite	3	29	Thick	14.1	400	0.94	1	10YR 7/2	Greyish yellow brown	33.6	27	6.6	31.7	7.6	1	35.8	27.3	8.5	-2.2	-6.14525	-0.3	-1.0989	-1.9
October 2nd	Warm	Warm	26	9	0	300	Upper	Soft	White limestone	6	16	Thick	12.3	460	0.94	1	2.5Y 8/1	Light grey	33.8	27.3	6.5	31.3	7.8	1.3	35.2	29.2	6	-1.4	-3.97727	-1.9	-6.50685	0.5
October 2nd	Warm	Warm	26	9	0	300	Upper	Hard	Grey siltstone	2	9	Thick	12.6	624	0.92	0	2.5GY 7/1	Light olive grey	40	32.1	7.9	38.3	14	6.1	40.4	32.3	8.1	-0.4	-0.990099	-0.2	-0.619195	-0.2
October 2nd	Warm	Warm	26	9	0	300	Upper	Hard	Quartzite	3	30	Thick	14.3	376	0.96	0	10YR 8/1	Light grey	31.8	23.3	8.5	28.6	5.8	-2.7	32	23.5	8.5	-0.2	-0.625	-0.2	-0.851064	0
October 2nd	Warm	Warm	26	9	0	300	Upper	Hard	Purple siltstone	1	4	Thin	6.4	608	0.94	0	10R 6/1	Reddish grey	37.3	30.3	7	34.3	11.3	4.3	38.6	30.9	7.7	-1.3	-3.36788	-0.6	-1.94175	-0.7
October 2nd	Warm	Warm	26	9	0	300	Upper	Soft	Fossiliferous sandstone	4	36	Thin	7.5	732	0.86	0	2.5Y 7/4	Light yellow	36.7	29.6	7.1	33.5	10.7	3.6	38	29.4	8.6	-1.3	-3.42105	0.2	0.680272	-1.5
October 2nd	Warm	Warm	26	9	0	300	Upper	Soft	Fossiliferous sandstone	4	31	Thin	6.9	588	0.94	0	2.5Y 7/6	Yellowish brown	40.6	31	9.6	36.2	14.6	5	40.8	31.2	9.6	-0.2	-0.490196	-0.2	-0.641026	0
October 2nd	Warm	Warm	26	9	0	300	Upper	Soft	White limestone	6	15	Thin	5.9	612	0.82	1	2.5Y 8/1	Light grey	34.8	27.6	7.2	31	8.8	1.6	36.2	28.7	7.5	-1.4	-3.8674	-1.1	-3.83275	-0.3
October 2nd	Warm	Warm	26	9	0	300	Upper	Soft	Orange limestone	5	22	Intermediate	7.6	632	0.94	0	2.5Y 7/4	Light yellow	39	30.3	8.7	35.9	13	4.3	39.3	31.1	8.2	-0.3	-0.763359	-0.8	-2.57235	0.5
October 2nd	Warm	Warm	26	9	0	300	Upper	Hard	Grey siltstone	2	7	Thick	12.3	436	0.94	0	N 7/0	Greyish white	40.6	30	10.6	37	14.6	4	41.2	30.5	10.7	-0.6	-1.45631	-0.5	-1.63934	-0.1
October 2nd	Warm	Warm	26	9	0	300	Upper	Soft	Orange limestone	5	23	Thin	6.1	808	0.91	0	5Y 8/3	Pale yellow	35.6	28.6	7	33.2	9.6	2.6	36.8	29.9	6.9	-1.2	-3.26087	-1.3	-4.34783	0.1
October 2nd	Warm	Warm	26	9	0	300	Upper	Hard	Purple siltstone	1	2	Thick	14.3	484	0.97	0	7.5YR 5/1	Brownish grey	42.2	32.6	9.6	38.5	16.2	6.6	42.1	33	9.1	0.1	0.23753	-0.4	-1.21212	0.5
October 2nd	Warm	Warm	26	9	0	300	Upper	Soft	White limestone	6	13	Intermediate	9.4	592	0.91	2	2.5Y 8/1	Light grey	34	26	8	31.8	8	0	34.7	26.1	8.6	-0.7	-2.01729	-0.1	-0.383142	-0.6
October 2nd	Warm	Warm	26	9	0	300	Upper	Hard	Grey siltstone	2	11	Thin	7.3	688	0.94	0	N 7/0	Greyish white	40.2	31.1	9.1	38.9	14.2	5.1	41.1	31.1	10	-0.9	-2.18978	0	0	-0.9
October 2nd	Warm	Warm	26	9	0	300	Upper	Hard	Purple siltstone	1	1	Intermediate	11.2	384	0.92	0	2.5YR 5/1	Reddish grey	40.8	31.2	9.6	38.1	14.8	5.2	41.5	34.2	7.3	-0.7	-1.68675	-3	-8.77193	2.3
October 2nd	Warm	Warm	26	9	0	300	Upper	Hard	Grey siltstone	2	10	Intermediate	8.4	552	0.94	0	2.5GY 7/1	Light olive grey	37.9	29.7	8.2	35.8	11.9	3.7	39.4	31.5	7.9	-1.5	-3.80711	-1.8	-5.71429	0.3
October 2nd	Warm	Warm	26	9	0	300	Upper	Soft	Orange limestone	5	19	Intermediate	6.8	604	0.94	0	2.5Y 6/4	Dull yellow	36.8	30.5	6.3	34.8	10.8	4.5	38	32.8	5.2	-1.2	-3.15789	-2.3	-7.0122	1.1
October 2nd	Warm	Warm	26	9	0	300	Upper	Soft	White limestone	6	14	Thin	6.5	830	0.97	4	2.5Y 8/1	Light grey	33.6	28.8	4.8	32.1	7.6	2.8	36	30.4	5.6	-2.4	-6.66667	-1.6	-5.26316	-0.8
October 2nd	Warm	Warm	26	9	0	300	Upper	Soft	Fossiliferous sandstone	4	35	Thick	15	704	0.91	0	2.5Y 5/6	Yellowish brown	39.9	31.1	8.8	38.8	13.9	5.1	41.6	35.6	6	-1.7	-4.08654	-4.5	-12.6404	2.8
October 2nd	Warm	Warm	26	9	0	300	Upper	Hard	Purple siltstone	1	5	Thin	6.5	508	0.92	0	10R 6/1	Reddish grey	39.4	28.9	10.5	37.7	13.4	2.9	42.6	29.8	12.8	-3.2	-7.51174	-0.9	-3.02013	-2.3
October 2nd	Warm	Warm	26	9	0	300	Upper	Hard	Quartzite	3	28	Intermediate	12.6	328	0.95	0	10YR 8/1	Light grey	28.8	19.3	9.5	25	2.8	-6.7	30.1	21.4	8.7	-1.3	-4.31894	-2.1	-9.81308	0.8
October 2nd	Warm	Warm	26	9	0	300	Upper	Soft	Orange limestone	5	24	Thin	6	620	0.94	0	2.5Y 7/4	Light yellow	37.6	29.1	8.5	34.3	11.6	3.1	38.6	30.8	7.8	-1	-2.59067	-1.7	-5.51948	0.7
October 2nd	Warm	Warm	26	9	0	300	Upper	Hard	Quartzite	3	27	Intermediate	11.1	444	0.94	0	10YR 8/1	Light grey	30.6	24.8	5.8	27.6	4.6	-1.2	30.9	26.5	4.4	-0.3	-0.970874	-1.7	-6.41509	1.4
October 2nd	Warm	Warm	26	9	0	300	Upper	Soft	White limestone	6	18	Thick	12	544	0.85	1	2.5Y 8/1	Light grey	34.3	27.4	6.9	32.5	8.3	1.4	35.6	29.4	6.2	-1.3	-3.65169	-2	-6.80272	0.7
October 2nd	Warm	Warm	26	9	0	300	Upper	Soft	Fossiliferous sandstone	4	34	Thick	13.9	436	0.76	0	2.5Y 7/4	Light yellow	40.1	29.7	10.4	37.7	14.1	3.7	39.5	30.4	9.1	0.6	1.51899	-0.7	-2.30263	1.3
October 2nd	Warm	Warm	26	9	0	300	Upper	Hard	Purple siltstone	1	6	Thick	13.5	596	0.94	0	7.5R 5/1	Reddish grey	44.7	34.3	10.4	41.9	18.7	8.3	43.8	34.2	9.6	0.9	2.05479	0.1	0.292398	0.8
October 2nd	Warm	Warm	26	9	0	300	Upper	Hard	Quartzite	3	26	Thin	7.9	500	0.97	0	10YR 7/2	Greyish yellow brown	33.9	24.8	9.1	27.7	7.9	-1.2	34.4	26.3	8.1	-0.5	-1.45349	-1.5	-5.70342	1
October 2nd	Warm	Warm	26	9	0	300	Upper	Soft	White limestone	6	17	Intermediate	9.5	444	0.95	0	2.5Y 8/1	Light grey	33.2	25.2	8	31.5	7.2	-0.8	33.7	25.9	7.8	-0.5	-1.48368	-0.7	-2.7027	0.2
October 2nd	Warm	Warm	26	9	0	300	Upper	Hard	Grey siltstone	2	8	Intermediate	8.1	592	0.97	0	2.5GY 6/1	Olive grey	40.6	32.1	8.5	37.8	14.6	6.1	40.3	32.9	7.4	0.3	0.744417	-0.8	-2.43161	1.1
October 2nd	Warm	Warm	26	9	0	300	Upper	Soft	Fossiliferous sandstone	4	32	Intermediate	7.9	524	0.92	0	2.5Y 7/4	Light yellow	37.9	29.4	8.5	34.4	11.9	3.4	37.8	30.9	6.9	0.1	0.26455	-1.5	-4.85437	1.6
October 2nd	Warm	Warm	26	9	0	300	Lower	Hard	Purple siltstone	1	3	Intermediate	11.6	354	0.91	0	10R 5/1	Reddish grey	36.2	29.6	6.6	33.3	10.2	3.6	36.7	27.2	9.5	-0.5	-1.3624	2.4	8.82353	-2.9
October 2nd	Warm	Warm	26	9	0	300	Lower	Soft	Orange limestone	5	21	Thick	12.4	608	0.91	0	2.5Y 8/4	Pale yellow	27.1	20.5	6.6	23.9	1.1	-5.5	29	20.3	8.7	-1.9	-6.55172	0.2	0.985222	-2.1
October 2nd	Warm	Warm	26	9	0	300	Lower	Hard	Quartzite	3	25	Thin	9.6	584	0.92	0	10YR 6/2	Greyish yellow brown	34.4	22.8	11.6	28.2	8.4	-3.2	35.1	23.7	11.4	-0.7	-1.9943	-0.9	-3.79747	0.2
October 2nd	Warm	Warm	26	9	0	300	Lower	Soft	Fossiliferous sandstone	4	33	Intermediate	8.6	680	0.91	0	2.5Y 6/4	Dull yellow	35.1	23.7	11.4	31	9.1	-2.3	33.7	24	9.7	1.4	4.1543	-0.3	-1.25	1.7
October 2nd	Warm	Warm	26	9	0	300	Lower	Hard	Grey siltstone	2	12	Thin	7.5	576	0.94	0	N 6/0	Grey	39.3	30.2	9.1	30.8	13.3	4.2	40.4	30.7	9.7	-1.1	-2.72277	-0.5	-1.62866	-0.6
October 2nd	Warm	Warm	26	9	0	300	Lower	Soft	Orange limestone	5	20	Thick	11.7	420	0.97	0	10YR 8/3	Light yellow	26.8	20.9	5.9	21.8	0.8	-5.1	27.7	19.8	7.9	-0.9	-3.2491	1.1	5.55556	-2
October 2nd	Warm	Warm	26	9	0	300	Lower	Hard	Quartzite	3	29	Thick	14.1	368	0.94	0	10YR 7/2	Greyish yellow brown	30.6	25.1	5.5	27.9	4.6	-0.9	29.4	23.1	6.3	1.2	4.08163	2	8.65801	-0.8
October 2nd	Warm	Warm	26	9	0	300	Lower	Soft	White limestone	6	16	Thick	12.3	412	0.94	0	2.5Y 8/1	Light grey	27.8	22.5	5.3	24.8	1.8	-3.5	28.5	21.6	6.9	-0.7	-2.45614	0.9	4.16667	-1.6
October 2nd	Warm	Warm	26	9	0	300	Lower	Hard	Grey siltstone	2	9	Thick	12.6	532	0.97	0	2.5GY 7/1	Light olive grey	36.1	29.9	6.2	31	10.1	3.9	34.3	27.8	6.5	1.8	5.24781	2.1	7.55396	-0.3
October 2nd	Warm	Warm	26	9	0	300	Lower	Hard	Quartzite	3	30	Thick	14.3	588	0.9	0	10YR 8/1	Light grey	28.9	23.6	5.3	26.1	2.9	-2.4	30.4	23.1	7.3	-1.5	-4.93421	0.5	2.1645	-2
October 2nd	Warm	Warm	26	9	0	300	Lower	Hard	Purple siltstone	1	4	Thin	6.4	608	0.95	0	10R 6/1	Reddish grey	37.3	29.4	7.9	31.3	11.3	3.4	37.3	29	8.3	0	0	0.4	1.37931	-0.4
October 2nd	Warm	Warm	26	9	0	300	Lower	Soft	Fossiliferous sandstone	4	36	Thin	7.5	742	0.88	1	2.5Y 7/4	Light yellow	36.3	27.3	9	29.9	10.3	1.3	37.2	28.7	8.5	-0.9	-2.41935	-1.4	-4.87805	0.5
October 2nd	Warm	Warm	26	9	0	300	Lower	Soft	Fossiliferous sandstone	4	31	Thin	6.9	580	0.94	0	2.5Y 7/6	Yellowish brown	39	27.3	11.7	32.1	13	1.3	38.9	26.8	12.1	0.1	0.257069	0.5	1.86567	-0.4
October 2nd	Warm	Warm	26	9	0	300	Lower	Soft	White limestone	6	15	Thin	5.9	564	0.92	2	2.5Y 8/1	Light grey	37	25.4	11.6	27.5	11	-0.6	36.8	25	11.8	0.2	0.543478	0.4	1.6	-0.2
October 2nd	Warm	Warm	26	9	0	300	Lower	Soft	Orange limestone	5	22	Intermediate	7.6	584	0.94	0	2.5Y 7/4	Light yellow	39.1	28.5	10.6	29.3	13.1	2.5	32.7	27.2	5.5	6.4	19.5719	1.3	4.77941	5.1
October 2nd	Warm	Warm	26	9	0	300	Lower	Hard	Grey siltstone	2	7	Thick	12.3	544	0.95	0	N 7/0	Greyish white	36.4	29.4	7	31.8	10.4	3.4	34.4	28.5	5.9	2	5.81395	0.9	3.15789	1.1
October 2nd	Warm	Warm	26	9	0	300	Lower	Soft	Orange limestone	5	23	Thin	6.1	792	0.94	0	5Y 8/3	Pale yellow	36.5	28.4	8.1	31	10.5	2.4	36.6	28	8.6	-0.1	-0.273224	0.4	1.42857	-0.5
October 2nd	Warm	Warm	26	9	0	300	Lower	Hard	Purple siltstone	1	2	Thick	14.3	456	0.94	0	7.5YR 5/1	Brownish grey	35.8	29.8	6	32.2	9.8	3.8	35.7	28.7	7	0.1	0.280112	1.1	3.83275	-1
October 2nd	Warm	Warm	26	9	0	300	Lower	Soft	White limestone	6	13	Intermediate	9.4	492	0.91	2	2.5Y 8/1	Light grey	34.6	24.6	10	28.8	8.6	-1.4	31.8	23.9	7.9	2.8	8.80503	0.7	2.92887	2.1
October 2nd	Warm	Warm	26	9	0	300	Lower	Hard	Grey siltstone	2	11	Thin	7.3	696	0.92	0	N 7/0	Greyish white	37.7	29.2	8.5	31.3	11.7	3.2	38.8	30	8.8	-1.1	-2.83505	-0.8	-2.66667	-0.3
October 2nd	Warm	Warm	26	9	0	300	Lower	Hard	Purple siltstone	1	1	Intermediate	11.2	408	0.94	0	2.5YR 5/1	Reddish grey	39.3	30	9.3	32.9	13.3	4	39.8	30.9	8.9	-0.5	-1.25628	-0.9	-2.91262	0.4
October 2nd	Warm	Warm	26	9	0	300	Lower	Hard	Grey siltstone	2	10	Intermediate	8.4	556	0.94	0	2.5GY 7/1	Light olive grey	39.3	31.7	7.6	32.9	13.3	5.7	39.3	31.8	7.5	0	0	-0.1	-0.314465	0.1
October 2nd	Warm	Warm	26	9	0	300	Lower	Soft	Orange limestone	5	19	Intermediate	6.8	528	0.92	0	2.5Y 6/4	Dull yellow	37.1	28.5	8.6	29.9	11.1	2.5	34.2	28.7	5.5	2.9	8.47953	-0.2	-0.696864	3.1
October 2nd	Warm	Warm	26	9	0	300	Lower	Soft	White limestone	6	14	Thin	6.5	816	0.95	2	2.5Y 8/1	Light grey	35.2	24	11.2	26.7	9.2	-2	36.4	24.6	11.8	-1.2	-3.2967	-0.6	-2.43902	-0.6
October 2nd	Warm	Warm	26	9	0	300	Lower	Soft	Fossiliferous sandstone	4	35	Thick	15	664	0.91	1	2.5Y 5/6	Yellowish brown	40.3	26.7	13.6	30.7	14.3	0.7	40.3	26.2	14.1	0	0	0.5	1.9084	-0.5
October 2nd	Warm	Warm	26	9	0	300	Lower	Hard	Purple siltstone	1	5	Thin	6.5	496	0.97	0	10R 6/1	Reddish grey	39.5	31.3	8.2	33.3	13.5	5.3	40.6	33.8	6.8	-1.1	-2.70936	-2.5	-7.39645	1.4
October 2nd	Warm	Warm	26	9	0	300	Lower	Hard	Quartzite	3	28	Intermediate	12.6	464	0.92	0	10YR 8/1	Light grey	30.8	24	6.8	25.5	4.8	-2	31.1	24.3	6.8	-0.3	-0.96463	-0.3	-1.23457	0
October 2nd	Warm	Warm	26	9	0	300	Lower	Soft	Orange limestone	5	24	Thin	6	588	0.94	1	2.5Y 7/4	Light yellow	33.5	28.6	4.9	29.9	7.5	2.6	33.5	27.6	5.9	0	0	1	3.62319	-1
October 2nd	Warm	Warm	26	9	0	300	Lower	Hard	Quartzite	3	27	Intermediate	11.1	448	0.94	0	10YR 8/1	Light grey	31.4	25.3	6.1	28	5.4	-0.7	30.3	25.5	4.8	1.1	3.63036	-0.2	-0.784314	1.3
October 2nd	Warm	Warm	26	9	0	300	Lower	Soft	White limestone	6	18	Thick	12	504	0.81	0	2.5Y 8/1	Light grey	31.2	24.3	6.9	24.3	5.2	-1.7	29.8	23.5	6.3	1.4	4.69799	0.8	3.40426	0.6
October 2nd	Warm	Warm	26	9	0	300	Lower	Soft	Fossiliferous sandstone	4	34	Thick	13.9	520	0.95	0	2.5Y 7/4	Light yellow	34.5	25.6	8.9	28	8.5	-0.4	34.6	26.1	8.5	-0.1	-0.289017	-0.5	-1.91571	0.4
October 2nd	Warm	Warm	26	9	0	300	Lower	Hard	Purple siltstone	1	6	Thick	13.5	516	1	0	7.5R 5/1	Reddish grey	37.2	32.5	4.7	34.8	11.2	6.5	37.2	30	7.2	0	0	2.5	8.33333	-2.5
October 2nd	Warm	Warm	26	9	0	300	Lower	Hard	Quartzite	3	26	Thin	7.9	496	0.94	0	10YR 7/2	Greyish yellow brown	33.9	26.1	7.8	31.7	7.9	0.1	35.5	26.8	8.7	-1.6	-4.50704	-0.7	-2.61194	-0.9
October 2nd	Warm	Warm	26	9	0	300	Lower	Soft	White limestone	6	17	Intermediate	9.5	448	0.92	1	2.5Y 8/1	Light grey	34.9	25.3	9.6	28.5	8.9	-0.7	34	24.9	9.1	0.9	2.64706	0.4	1.60643	0.5
October 2nd	Warm	Warm	26	9	0	300	Lower	Hard	Grey siltstone	2	8	Intermediate	8.1	584	0.97	0	2.5GY 6/1	Olive grey	40	31.5	8.5	34.1	14	5.5	40.2	32.2	8	-0.2	-0.497512	-0.7	-2.17391	0.5
October 2nd	Warm	Warm	26	9	0	300	Lower	Soft	Fossiliferous sandstone	4	32	Intermediate	7.9	536	0.91	0	2.5Y 7/4	Light yellow	37.6	28.6	9	31.8	11.6	2.6	37.7	28.6	9.1	-0.1	-0.265252	0	0	-0.1
October 6th	Mild	Cloudy	24	5	7	0	Upper	Hard	Purple siltstone	1	3	Intermediate	11.6	424	0.91	0	10R 5/1	Reddish grey	24.7	19.2	5.5	21.4	0.7	-4.8
October 6th	Mild	Cloudy	24	5	7	0	Upper	Soft	Orange limestone	5	21	Thick	12.4	676	0.88	1	2.5Y 8/4	Pale yellow	23.5	18.1	5.4	19.8	-0.5	-5.9
October 6th	Mild	Cloudy	24	5	7	0	Upper	Hard	Quartzite	3	25	Thin	9.6	636	0.87	0	10YR 6/2	Greyish yellow brown	21.5	15.7	5.8	17.3	-2.5	-8.3
October 6th	Mild	Cloudy	24	5	7	0	Upper	Soft	Fossiliferous sandstone	4	33	Intermediate	8.6	672	0.85	0	2.5Y 6/4	Dull yellow	24.7	19.8	4.9	21.9	0.7	-4.2
October 6th	Mild	Cloudy	24	5	7	0	Upper	Hard	Grey siltstone	2	12	Thin	7.5	580	0.95	0	N 6/0	Grey	22.7	19.2	3.5	20.4	-1.3	-4.8
October 6th	Mild	Cloudy	24	5	7	0	Upper	Soft	Orange limestone	5	20	Thick	11.7	356	0.92	0	10YR 8/3	Light yellow	23.1	18.5	4.6	20.3	-0.9	-5.5
October 6th	Mild	Cloudy	24	5	7	0	Upper	Hard	Quartzite	3	29	Thick	14.1	400	0.94	1	10YR 7/2	Greyish yellow brown	20.7	16	4.7	17.3	-3.3	-8
October 6th	Mild	Cloudy	24	5	7	0	Upper	Soft	White limestone	6	16	Thick	12.3	460	0.94	1	2.5Y 8/1	Light grey	22	16.9	5.1	18.8	-2	-7.1
October 6th	Mild	Cloudy	24	5	7	0	Upper	Hard	Grey siltstone	2	9	Thick	12.6	624	0.92	0	2.5GY 7/1	Light olive grey	21.9	18.1	3.8	18.9	-2.1	-5.9
October 6th	Mild	Cloudy	24	5	7	0	Upper	Hard	Quartzite	3	30	Thick	14.3	376	0.96	0	10YR 8/1	Light grey	17.6	13.2	4.4	16.1	-6.4	-10.8
October 6th	Mild	Cloudy	24	5	7	0	Upper	Hard	Purple siltstone	1	4	Thin	6.4	608	0.94	0	10R 6/1	Reddish grey	18	14.8	3.2	16.2	-6	-9.2
October 6th	Mild	Cloudy	24	5	7	0	Upper	Soft	Fossiliferous sandstone	4	36	Thin	7.5	732	0.86	0	2.5Y 7/4	Light yellow	20.6	16.9	3.7	17.9	-3.4	-7.1
October 6th	Mild	Cloudy	24	5	7	0	Upper	Soft	Fossiliferous sandstone	4	31	Thin	6.9	588	0.94	0	2.5Y 7/6	Yellowish brown	20.4	16.8	3.6	19.4	-3.6	-7.2
October 6th	Mild	Cloudy	24	5	7	0	Upper	Soft	White limestone	6	15	Thin	5.9	612	0.82	1	2.5Y 8/1	Light grey	18.1	16.1	2	17.3	-5.9	-7.9
October 6th	Mild	Cloudy	24	5	7	0	Upper	Soft	Orange limestone	5	22	Intermediate	7.6	632	0.94	0	2.5Y 7/4	Light yellow	20.1	17.5	2.6	19.3	-3.9	-6.5
October 6th	Mild	Cloudy	24	5	7	0	Upper	Hard	Grey siltstone	2	7	Thick	12.3	436	0.94	0	N 7/0	Greyish white	20.9	16.8	4.1	18.7	-3.1	-7.2
October 6th	Mild	Cloudy	24	5	7	0	Upper	Soft	Orange limestone	5	23	Thin	6.1	808	0.91	0	5Y 8/3	Pale yellow	19.7	15.6	4.1	17.8	-4.3	-8.4
October 6th	Mild	Cloudy	24	5	7	0	Upper	Hard	Purple siltstone	1	2	Thick	14.3	484	0.97	0	7.5YR 5/1	Brownish grey	22.4	16.9	5.5	19.2	-1.6	-7.1
October 6th	Mild	Cloudy	24	5	7	0	Upper	Soft	White limestone	6	13	Intermediate	9.4	592	0.91	2	2.5Y 8/1	Light grey	19.7	15.7	4	17.7	-4.3	-8.3
October 6th	Mild	Cloudy	24	5	7	0	Upper	Hard	Grey siltstone	2	11	Thin	7.3	688	0.94	0	N 7/0	Greyish white	20.5	15.7	4.8	18.5	-3.5	-8.3
October 6th	Mild	Cloudy	24	5	7	0	Upper	Hard	Purple siltstone	1	1	Intermediate	11.2	384	0.92	0	2.5YR 5/1	Reddish grey	21.3	17.7	3.6	19.4	-2.7	-6.3
October 6th	Mild	Cloudy	24	5	7	0	Upper	Hard	Grey siltstone	2	10	Intermediate	8.4	552	0.94	0	2.5GY 7/1	Light olive grey	19.4	15.5	3.9	17.4	-4.6	-8.5
October 6th	Mild	Cloudy	24	5	7	0	Upper	Soft	Orange limestone	5	19	Intermediate	6.8	604	0.94	0	2.5Y 6/4	Dull yellow	20.3	16.3	4	18	-3.7	-7.7
October 6th	Mild	Cloudy	24	5	7	0	Upper	Soft	White limestone	6	14	Thin	6.5	830	0.97	4	2.5Y 8/1	Light grey	18.6	15.1	3.5	16.9	-5.4	-8.9
October 6th	Mild	Cloudy	24	5	7	0	Upper	Soft	Fossiliferous sandstone	4	35	Thick	15	704	0.91	0	2.5Y 5/6	Yellowish brown	22	16.3	5.7	17.9	-2	-7.7
October 6th	Mild	Cloudy	24	5	7	0	Upper	Hard	Purple siltstone	1	5	Thin	6.5	508	0.92	0	10R 6/1	Reddish grey	19.8	15.8	4	18.8	-4.2	-8.2
October 6th	Mild	Cloudy	24	5	7	0	Upper	Hard	Quartzite	3	28	Intermediate	12.6	328	0.95	0	10YR 8/1	Light grey	17.4	13.8	3.6	15.4	-6.6	-10.2
October 6th	Mild	Cloudy	24	5	7	0	Upper	Soft	Orange limestone	5	24	Thin	6	620	0.94	0	2.5Y 7/4	Light yellow	21	17.3	3.7	18.4	-3	-6.7
October 6th	Mild	Cloudy	24	5	7	0	Upper	Hard	Quartzite	3	27	Intermediate	11.1	444	0.94	0	10YR 8/1	Light grey	18.1	14.1	4	16.5	-5.9	-9.9
October 6th	Mild	Cloudy	24	5	7	0	Upper	Soft	White limestone	6	18	Thick	12	544	0.85	1	2.5Y 8/1	Light grey	20.9	18.1	2.8	19.4	-3.1	-5.9
October 6th	Mild	Cloudy	24	5	7	0	Upper	Soft	Fossiliferous sandstone	4	34	Thick	13.9	436	0.76	0	2.5Y 7/4	Light yellow	22.8	19.7	3.1	21.6	-1.2	-4.3
October 6th	Mild	Cloudy	24	5	7	0	Upper	Hard	Purple siltstone	1	6	Thick	13.5	596	0.94	0	7.5R 5/1	Reddish grey	21	18.7	2.3	19.9	-3	-5.3
October 6th	Mild	Cloudy	24	5	7	0	Upper	Hard	Quartzite	3	26	Thin	7.9	500	0.97	0	10YR 7/2	Greyish yellow brown	19.7	14.4	5.3	15.8	-4.3	-9.6
October 6th	Mild	Cloudy	24	5	7	0	Upper	Soft	White limestone	6	17	Intermediate	9.5	444	0.95	0	2.5Y 8/1	Light grey	20	15.5	4.5	17.5	-4	-8.5
October 6th	Mild	Cloudy	24	5	7	0	Upper	Hard	Grey siltstone	2	8	Intermediate	8.1	592	0.97	0	2.5GY 6/1	Olive grey	22.5	17.2	5.3	19.5	-1.5	-6.8
October 6th	Mild	Cloudy	24	5	7	0	Upper	Soft	Fossiliferous sandstone	4	32	Intermediate	7.9	524	0.92	0	2.5Y 7/4	Light yellow	21.3	17.2	4.1	19	-2.7	-6.8
October 6th	Mild	Cloudy	24	5	7	0	Lower	Hard	Purple siltstone	1	3	Intermediate	11.6	354	0.91	0	10R 5/1	Reddish grey	21.9	17.5	4.4	18.8	-2.1	-6.5
October 6th	Mild	Cloudy	24	5	7	0	Lower	Soft	Orange limestone	5	21	Thick	12.4	608	0.91	0	2.5Y 8/4	Pale yellow	19.3	15.7	3.6	16.6	-4.7	-8.3
October 6th	Mild	Cloudy	24	5	7	0	Lower	Hard	Quartzite	3	25	Thin	9.6	584	0.92	0	10YR 6/2	Greyish yellow brown	21.9	16.1	5.8	19.3	-2.1	-7.9
October 6th	Mild	Cloudy	24	5	7	0	Lower	Soft	Fossiliferous sandstone	4	33	Intermediate	8.6	680	0.91	0	2.5Y 6/4	Dull yellow	23.5	19.3	4.2	21.7	-0.5	-4.7
October 6th	Mild	Cloudy	24	5	7	0	Lower	Hard	Grey siltstone	2	12	Thin	7.5	576	0.94	0	N 6/0	Grey	23.9	20.1	3.8	21.4	-0.1	-3.9
October 6th	Mild	Cloudy	24	5	7	0	Lower	Soft	Orange limestone	5	20	Thick	11.7	420	0.97	0	10YR 8/3	Light yellow	21.5	18.4	3.1	19.8	-2.5	-5.6
October 6th	Mild	Cloudy	24	5	7	0	Lower	Hard	Quartzite	3	29	Thick	14.1	368	0.94	0	10YR 7/2	Greyish yellow brown	21.5	17.2	4.3	19.3	-2.5	-6.8
October 6th	Mild	Cloudy	24	5	7	0	Lower	Soft	White limestone	6	16	Thick	12.3	412	0.94	0	2.5Y 8/1	Light grey	22	17.5	4.5	18.3	-2	-6.5
October 6th	Mild	Cloudy	24	5	7	0	Lower	Hard	Grey siltstone	2	9	Thick	12.6	532	0.97	0	2.5GY 7/1	Light olive grey	21.1	17.3	3.8	18.2	-2.9	-6.7
October 6th	Mild	Cloudy	24	5	7	0	Lower	Hard	Quartzite	3	30	Thick	14.3	588	0.9	0	10YR 8/1	Light grey	21.2	14.7	6.5	17.7	-2.8	-9.3
October 6th	Mild	Cloudy	24	5	7	0	Lower	Hard	Purple siltstone	1	4	Thin	6.4	608	0.95	0	10R 6/1	Reddish grey	22.2	17.1	5.1	19.1	-1.8	-6.9
October 6th	Mild	Cloudy	24	5	7	0	Lower	Soft	Fossiliferous sandstone	4	36	Thin	7.5	742	0.88	1	2.5Y 7/4	Light yellow	22.7	17.6	5.1	19.5	-1.3	-6.4
October 6th	Mild	Cloudy	24	5	7	0	Lower	Soft	Fossiliferous sandstone	4	31	Thin	6.9	580	0.94	0	2.5Y 7/6	Yellowish brown	23	18.2	4.8	19.2	-1	-5.8
October 6th	Mild	Cloudy	24	5	7	0	Lower	Soft	White limestone	6	15	Thin	5.9	564	0.92	2	2.5Y 8/1	Light grey	21.1	17.4	3.7	19.4	-2.9	-6.6
October 6th	Mild	Cloudy	24	5	7	0	Lower	Soft	Orange limestone	5	22	Intermediate	7.6	584	0.94	0	2.5Y 7/4	Light yellow	21.3	17.6	3.7	19.3	-2.7	-6.4
October 6th	Mild	Cloudy	24	5	7	0	Lower	Hard	Grey siltstone	2	7	Thick	12.3	544	0.95	0	N 7/0	Greyish white	22.1	18.2	3.9	19.9	-1.9	-5.8
October 6th	Mild	Cloudy	24	5	7	0	Lower	Soft	Orange limestone	5	23	Thin	6.1	792	0.94	0	5Y 8/3	Pale yellow	21.5	17.7	3.8	19	-2.5	-6.3
October 6th	Mild	Cloudy	24	5	7	0	Lower	Hard	Purple siltstone	1	2	Thick	14.3	456	0.94	0	7.5YR 5/1	Brownish grey	22.3	19.3	3	20.8	-1.7	-4.7
October 6th	Mild	Cloudy	24	5	7	0	Lower	Soft	White limestone	6	13	Intermediate	9.4	492	0.91	2	2.5Y 8/1	Light grey	21.6	16.6	5	20.5	-2.4	-7.4
October 6th	Mild	Cloudy	24	5	7	0	Lower	Hard	Grey siltstone	2	11	Thin	7.3	696	0.92	0	N 7/0	Greyish white	23.4	17.4	6	20.2	-0.6	-6.6
October 6th	Mild	Cloudy	24	5	7	0	Lower	Hard	Purple siltstone	1	1	Intermediate	11.2	408	0.94	0	2.5YR 5/1	Reddish grey	25.2	19.3	5.9	21.1	1.2	-4.7
October 6th	Mild	Cloudy	24	5	7	0	Lower	Hard	Grey siltstone	2	10	Intermediate	8.4	556	0.94	0	2.5GY 7/1	Light olive grey	22.5	19.8	2.7	20.7	-1.5	-4.2
October 6th	Mild	Cloudy	24	5	7	0	Lower	Soft	Orange limestone	5	19	Intermediate	6.8	528	0.92	0	2.5Y 6/4	Dull yellow	22.3	18.4	3.9	19.7	-1.7	-5.6
October 6th	Mild	Cloudy	24	5	7	0	Lower	Soft	White limestone	6	14	Thin	6.5	816	0.95	2	2.5Y 8/1	Light grey	21.3	15.7	5.6	18.6	-2.7	-8.3
October 6th	Mild	Cloudy	24	5	7	0	Lower	Soft	Fossiliferous sandstone	4	35	Thick	15	664	0.91	1	2.5Y 5/6	Yellowish brown	22.3	18	4.3	18.7	-1.7	-6
October 6th	Mild	Cloudy	24	5	7	0	Lower	Hard	Purple siltstone	1	5	Thin	6.5	496	0.97	0	10R 6/1	Reddish grey	24.3	18.9	5.4	21	0.3	-5.1
October 6th	Mild	Cloudy	24	5	7	0	Lower	Hard	Quartzite	3	28	Intermediate	12.6	464	0.92	0	10YR 8/1	Light grey	21.7	16.8	4.9	20.3	-2.3	-7.2
October 6th	Mild	Cloudy	24	5	7	0	Lower	Soft	Orange limestone	5	24	Thin	6	588	0.94	1	2.5Y 7/4	Light yellow	21.9	18.3	3.6	19.5	-2.1	-5.7
October 6th	Mild	Cloudy	24	5	7	0	Lower	Hard	Quartzite	3	27	Intermediate	11.1	448	0.94	0	10YR 8/1	Light grey	22	17.6	4.4	18.2	-2	-6.4
October 6th	Mild	Cloudy	24	5	7	0	Lower	Soft	White limestone	6	18	Thick	12	504	0.81	0	2.5Y 8/1	Light grey	21.6	16.8	4.8	18.7	-2.4	-7.2
October 6th	Mild	Cloudy	24	5	7	0	Lower	Soft	Fossiliferous sandstone	4	34	Thick	13.9	520	0.95	0	2.5Y 7/4	Light yellow	23.9	19.5	4.4	21.5	-0.1	-4.5
October 6th	Mild	Cloudy	24	5	7	0	Lower	Hard	Purple siltstone	1	6	Thick	13.5	516	1	0	7.5R 5/1	Reddish grey	23	20.3	2.7	20.9	-1	-3.7
October 6th	Mild	Cloudy	24	5	7	0	Lower	Hard	Quartzite	3	26	Thin	7.9	496	0.94	0	10YR 7/2	Greyish yellow brown	23.2	19	4.2	21.2	-0.8	-5
October 6th	Mild	Cloudy	24	5	7	0	Lower	Soft	White limestone	6	17	Intermediate	9.5	448	0.92	1	2.5Y 8/1	Light grey	21.7	18.3	3.4	20	-2.3	-5.7
October 6th	Mild	Cloudy	24	5	7	0	Lower	Hard	Grey siltstone	2	8	Intermediate	8.1	584	0.97	0	2.5GY 6/1	Olive grey	25.3	20.6	4.7	22.7	1.3	-3.4
October 6th	Mild	Cloudy	24	5	7	0	Lower	Soft	Fossiliferous sandstone	4	32	Intermediate	7.9	536	0.91	0	2.5Y 7/4	Light yellow	22.3	19.1	3.2	20.7	-1.7	-4.9
October 6th	Mild	Cloudy	22	5	0	60	Upper	Hard	Purple siltstone	1	3	Intermediate	11.6	424	0.91	0	10R 5/1	Reddish grey	32	21.9	10.1	27.8	10	-0.1	24.7	19.2	5.5	7.3	29.5547	2.7	14.0625	4.6
October 6th	Mild	Cloudy	22	5	0	60	Upper	Soft	Orange limestone	5	21	Thick	12.4	676	0.88	1	2.5Y 8/4	Pale yellow	28.2	18.6	9.6	21.5	6.2	-3.4	23.5	18.1	5.4	4.7	20	0.5	2.76243	4.2
October 6th	Mild	Cloudy	22	5	0	60	Upper	Hard	Quartzite	3	25	Thin	9.6	636	0.87	0	10YR 6/2	Greyish yellow brown	27.1	18.8	8.3	21.5	5.1	-3.2	21.5	15.7	5.8	5.6	26.0465	3.1	19.7452	2.5
October 6th	Mild	Cloudy	22	5	0	60	Upper	Soft	Fossiliferous sandstone	4	33	Intermediate	8.6	672	0.85	0	2.5Y 6/4	Dull yellow	31.6	22.6	9	25.7	9.6	0.6	24.7	19.8	4.9	6.9	27.9352	2.8	14.1414	4.1
October 6th	Mild	Cloudy	22	5	0	60	Upper	Hard	Grey siltstone	2	12	Thin	7.5	580	0.95	0	N 6/0	Grey	32.3	24.9	7.4	27.4	10.3	2.9	22.7	19.2	3.5	9.6	42.2907	5.7	29.6875	3.9
October 6th	Mild	Cloudy	22	5	0	60	Upper	Soft	Orange limestone	5	20	Thick	11.7	356	0.92	0	10YR 8/3	Light yellow	27.8	19.2	8.6	21	5.8	-2.8	23.1	18.5	4.6	4.7	20.3463	0.7	3.78378	4
October 6th	Mild	Cloudy	22	5	0	60	Upper	Hard	Quartzite	3	29	Thick	14.1	400	0.94	1	10YR 7/2	Greyish yellow brown	27	18	9	21.7	5	-4	20.7	16	4.7	6.3	30.4348	2	12.5	4.3
October 6th	Mild	Cloudy	22	5	0	60	Upper	Soft	White limestone	6	16	Thick	12.3	460	0.94	1	2.5Y 8/1	Light grey	29.5	19	10.5	23	7.5	-3	22	16.9	5.1	7.5	34.0909	2.1	12.426	5.4
October 6th	Mild	Cloudy	22	5	0	60	Upper	Hard	Grey siltstone	2	9	Thick	12.6	624	0.92	0	2.5GY 7/1	Light olive grey	31.3	21.4	9.9	24.6	9.3	-0.6	21.9	18.1	3.8	9.4	42.9224	3.3	18.232	6.1
October 6th	Mild	Cloudy	22	5	0	60	Upper	Hard	Quartzite	3	30	Thick	14.3	376	0.96	0	10YR 8/1	Light grey	21.9	16.9	5	18.2	-0.1	-5.1	17.6	13.2	4.4	4.3	24.4318	3.7	28.0303	0.6
October 6th	Mild	Cloudy	22	5	0	60	Upper	Hard	Purple siltstone	1	4	Thin	6.4	608	0.94	0	10R 6/1	Reddish grey	28.8	20.4	8.4	24	6.8	-1.6	18	14.8	3.2	10.8	60	5.6	37.8378	5.2
October 6th	Mild	Cloudy	22	5	0	60	Upper	Soft	Fossiliferous sandstone	4	36	Thin	7.5	732	0.86	0	2.5Y 7/4	Light yellow	29.7	22.4	7.3	24.7	7.7	0.4	20.6	16.9	3.7	9.1	44.1748	5.5	32.5444	3.6
October 6th	Mild	Cloudy	22	5	0	60	Upper	Soft	Fossiliferous sandstone	4	31	Thin	6.9	588	0.94	0	2.5Y 7/6	Yellowish brown	31.5	20.7	10.8	25.7	9.5	-1.3	20.4	16.8	3.6	11.1	54.4118	3.9	23.2143	7.2
October 6th	Mild	Cloudy	22	5	0	60	Upper	Soft	White limestone	6	15	Thin	5.9	612	0.82	1	2.5Y 8/1	Light grey	24.3	17.9	6.4	22.6	2.3	-4.1	18.1	16.1	2	6.2	34.2541	1.8	11.1801	4.4
October 6th	Mild	Cloudy	22	5	0	60	Upper	Soft	Orange limestone	5	22	Intermediate	7.6	632	0.94	0	2.5Y 7/4	Light yellow	30.5	21.1	9.4	26.1	8.5	-0.9	20.1	17.5	2.6	10.4	51.7413	3.6	20.5714	6.8
October 6th	Mild	Cloudy	22	5	0	60	Upper	Hard	Grey siltstone	2	7	Thick	12.3	436	0.94	0	N 7/0	Greyish white	30.5	19.3	11.2	26.5	8.5	-2.7	20.9	16.8	4.1	9.6	45.933	2.5	14.881	7.1
October 6th	Mild	Cloudy	22	5	0	60	Upper	Soft	Orange limestone	5	23	Thin	6.1	808	0.91	0	5Y 8/3	Pale yellow	28.1	20.3	7.8	25.3	6.1	-1.7	19.7	15.6	4.1	8.4	42.6396	4.7	30.1282	3.7
October 6th	Mild	Cloudy	22	5	0	60	Upper	Hard	Purple siltstone	1	2	Thick	14.3	484	0.97	0	7.5YR 5/1	Brownish grey	33.6	21.5	12.1	27.4	11.6	-0.5	22.4	16.9	5.5	11.2	50	4.6	27.2189	6.6
October 6th	Mild	Cloudy	22	5	0	60	Upper	Soft	White limestone	6	13	Intermediate	9.4	592	0.91	2	2.5Y 8/1	Light grey	25.5	18.6	6.9	22.5	3.5	-3.4	19.7	15.7	4	5.8	29.4416	2.9	18.4713	2.9
October 6th	Mild	Cloudy	22	5	0	60	Upper	Hard	Grey siltstone	2	11	Thin	7.3	688	0.94	0	N 7/0	Greyish white	31.6	21.1	10.5	27.5	9.6	-0.9	20.5	15.7	4.8	11.1	54.1463	5.4	34.3949	5.7
October 6th	Mild	Cloudy	22	5	0	60	Upper	Hard	Purple siltstone	1	1	Intermediate	11.2	384	0.92	0	2.5YR 5/1	Reddish grey	31.1	21.6	9.5	28	9.1	-0.4	21.3	17.7	3.6	9.8	46.0094	3.9	22.0339	5.9
October 6th	Mild	Cloudy	22	5	0	60	Upper	Hard	Grey siltstone	2	10	Intermediate	8.4	552	0.94	0	2.5GY 7/1	Light olive grey	29.5	20.5	9	26.8	7.5	-1.5	19.4	15.5	3.9	10.1	52.0619	5	32.2581	5.1
October 6th	Mild	Cloudy	22	5	0	60	Upper	Soft	Orange limestone	5	19	Intermediate	6.8	604	0.94	0	2.5Y 6/4	Dull yellow	30.6	21.1	9.5	23.9	8.6	-0.9	20.3	16.3	4	10.3	50.7389	4.8	29.4479	5.5
October 6th	Mild	Cloudy	22	5	0	60	Upper	Soft	White limestone	6	14	Thin	6.5	830	0.97	4	2.5Y 8/1	Light grey	26.7	17.3	9.4	23.2	4.7	-4.7	18.6	15.1	3.5	8.1	43.5484	2.2	14.5695	5.9
October 6th	Mild	Cloudy	22	5	0	60	Upper	Soft	Fossiliferous sandstone	4	35	Thick	15	704	0.91	0	2.5Y 5/6	Yellowish brown	32.5	22.5	10	26.9	10.5	0.5	22	16.3	5.7	10.5	47.7273	6.2	38.0368	4.3
October 6th	Mild	Cloudy	22	5	0	60	Upper	Hard	Purple siltstone	1	5	Thin	6.5	508	0.92	0	10R 6/1	Reddish grey	31	21.8	9.2	27.8	9	-0.2	19.8	15.8	4	11.2	56.5657	6	37.9747	5.2
October 6th	Mild	Cloudy	22	5	0	60	Upper	Hard	Quartzite	3	28	Intermediate	12.6	328	0.95	0	10YR 8/1	Light grey	22.2	17.7	4.5	18.8	0.2	-4.3	17.4	13.8	3.6	4.8	27.5862	3.9	28.2609	0.9
October 6th	Mild	Cloudy	22	5	0	60	Upper	Soft	Orange limestone	5	24	Thin	6	620	0.94	0	2.5Y 7/4	Light yellow	29.5	20.8	8.7	23.6	7.5	-1.2	21	17.3	3.7	8.5	40.4762	3.5	20.2312	5
October 6th	Mild	Cloudy	22	5	0	60	Upper	Hard	Quartzite	3	27	Intermediate	11.1	444	0.94	0	10YR 8/1	Light grey	23.2	17.3	5.9	20	1.2	-4.7	18.1	14.1	4	5.1	28.1768	3.2	22.695	1.9
October 6th	Mild	Cloudy	22	5	0	60	Upper	Soft	White limestone	6	18	Thick	12	544	0.85	1	2.5Y 8/1	Light grey	25.5	17.7	7.8	21.1	3.5	-4.3	20.9	18.1	2.8	4.6	22.0096	-0.4	-2.20994	5
October 6th	Mild	Cloudy	22	5	0	60	Upper	Soft	Fossiliferous sandstone	4	34	Thick	13.9	436	0.76	0	2.5Y 7/4	Light yellow	31.4	21.6	9.8	26	9.4	-0.4	22.8	19.7	3.1	8.6	37.7193	1.9	9.64467	6.7
October 6th	Mild	Cloudy	22	5	0	60	Upper	Hard	Purple siltstone	1	6	Thick	13.5	596	0.94	0	7.5R 5/1	Reddish grey	32.3	22.4	9.9	28.1	10.3	0.4	21	18.7	2.3	11.3	53.8095	3.7	19.7861	7.6
October 6th	Mild	Cloudy	22	5	0	60	Upper	Hard	Quartzite	3	26	Thin	7.9	500	0.97	0	10YR 7/2	Greyish yellow brown	24.3	19.8	4.5	20.7	2.3	-2.2	19.7	14.4	5.3	4.6	23.3503	5.4	37.5	-0.8
October 6th	Mild	Cloudy	22	5	0	60	Upper	Soft	White limestone	6	17	Intermediate	9.5	444	0.95	0	2.5Y 8/1	Light grey	26.2	18.7	7.5	22.9	4.2	-3.3	20	15.5	4.5	6.2	31	3.2	20.6452	3
October 6th	Mild	Cloudy	22	5	0	60	Upper	Hard	Grey siltstone	2	8	Intermediate	8.1	592	0.97	0	2.5GY 6/1	Olive grey	31.1	20.8	10.3	27.5	9.1	-1.2	22.5	17.2	5.3	8.6	38.2222	3.6	20.9302	5
October 6th	Mild	Cloudy	22	5	0	60	Upper	Soft	Fossiliferous sandstone	4	32	Intermediate	7.9	524	0.92	0	2.5Y 7/4	Light yellow	29.3	20.5	8.8	23.8	7.3	-1.5	21.3	17.2	4.1	8	37.5587	3.3	19.186	4.7
October 6th	Mild	Cloudy	22	5	0	60	Lower	Hard	Purple siltstone	1	3	Intermediate	11.6	354	0.91	0	10R 5/1	Reddish grey	26.4	19.1	7.3	22	4.4	-2.9	21.9	17.5	4.4	4.5	20.5479	1.6	9.14286	2.9
October 6th	Mild	Cloudy	22	5	0	60	Lower	Soft	Orange limestone	5	21	Thick	12.4	608	0.91	0	2.5Y 8/4	Pale yellow	22.3	16.2	6.1	18.5	0.3	-5.8	19.3	15.7	3.6	3	15.544	0.5	3.18471	2.5
October 6th	Mild	Cloudy	22	5	0	60	Lower	Hard	Quartzite	3	25	Thin	9.6	584	0.92	0	10YR 6/2	Greyish yellow brown	27	17.7	9.3	21	5	-4.3	21.9	16.1	5.8	5.1	23.2877	1.6	9.93789	3.5
October 6th	Mild	Cloudy	22	5	0	60	Lower	Soft	Fossiliferous sandstone	4	33	Intermediate	8.6	680	0.91	0	2.5Y 6/4	Dull yellow	25.4	21	4.4	22.3	3.4	-1	23.5	19.3	4.2	1.9	8.08511	1.7	8.80829	0.2
October 6th	Mild	Cloudy	22	5	0	60	Lower	Hard	Grey siltstone	2	12	Thin	7.5	576	0.94	0	N 6/0	Grey	30.3	22	8.3	22.8	8.3	0	23.9	20.1	3.8	6.4	26.7782	1.9	9.45274	4.5
October 6th	Mild	Cloudy	22	5	0	60	Lower	Soft	Orange limestone	5	20	Thick	11.7	420	0.97	0	10YR 8/3	Light yellow	21.2	17.1	4.1	18.8	-0.8	-4.9	21.5	18.4	3.1	-0.3	-1.39535	-1.3	-7.06522	1
October 6th	Mild	Cloudy	22	5	0	60	Lower	Hard	Quartzite	3	29	Thick	14.1	368	0.94	0	10YR 7/2	Greyish yellow brown	21.5	15.5	6	18.3	-0.5	-6.5	21.5	17.2	4.3	0	0	-1.7	-9.88372	1.7
October 6th	Mild	Cloudy	22	5	0	60	Lower	Soft	White limestone	6	16	Thick	12.3	412	0.94	0	2.5Y 8/1	Light grey	21.5	16.4	5.1	18.8	-0.5	-5.6	22	17.5	4.5	-0.5	-2.27273	-1.1	-6.28571	0.6
October 6th	Mild	Cloudy	22	5	0	60	Lower	Hard	Grey siltstone	2	9	Thick	12.6	532	0.97	0	2.5GY 7/1	Light olive grey	24.8	20.4	4.4	21.6	2.8	-1.6	21.1	17.3	3.8	3.7	17.5355	3.1	17.9191	0.6
October 6th	Mild	Cloudy	22	5	0	60	Lower	Hard	Quartzite	3	30	Thick	14.3	588	0.9	0	10YR 8/1	Light grey	22.4	16.4	6	19.3	0.4	-5.6	21.2	14.7	6.5	1.2	5.66038	1.7	11.5646	-0.5
October 6th	Mild	Cloudy	22	5	0	60	Lower	Hard	Purple siltstone	1	4	Thin	6.4	608	0.95	0	10R 6/1	Reddish grey	30	21.1	8.9	22.6	8	-0.9	22.2	17.1	5.1	7.8	35.1351	4	23.3918	3.8
October 6th	Mild	Cloudy	22	5	0	60	Lower	Soft	Fossiliferous sandstone	4	36	Thin	7.5	742	0.88	1	2.5Y 7/4	Light yellow	28.2	19.1	9.1	21.8	6.2	-2.9	22.7	17.6	5.1	5.5	24.2291	1.5	8.52273	4
October 6th	Mild	Cloudy	22	5	0	60	Lower	Soft	Fossiliferous sandstone	4	31	Thin	6.9	580	0.94	0	2.5Y 7/6	Yellowish brown	29.1	19.8	9.3	21.6	7.1	-2.2	23	18.2	4.8	6.1	26.5217	1.6	8.79121	4.5
October 6th	Mild	Cloudy	22	5	0	60	Lower	Soft	White limestone	6	15	Thin	5.9	564	0.92	2	2.5Y 8/1	Light grey	22.7	17.3	5.4	20.3	0.7	-4.7	21.1	17.4	3.7	1.6	7.58294	-0.1	-0.574713	1.7
October 6th	Mild	Cloudy	22	5	0	60	Lower	Soft	Orange limestone	5	22	Intermediate	7.6	584	0.94	0	2.5Y 7/4	Light yellow	25.9	19.4	6.5	21.1	3.9	-2.6	21.3	17.6	3.7	4.6	21.5962	1.8	10.2273	2.8
October 6th	Mild	Cloudy	22	5	0	60	Lower	Hard	Grey siltstone	2	7	Thick	12.3	544	0.95	0	N 7/0	Greyish white	24.6	20.5	4.1	22.1	2.6	-1.5	22.1	18.2	3.9	2.5	11.3122	2.3	12.6374	0.2
October 6th	Mild	Cloudy	22	5	0	60	Lower	Soft	Orange limestone	5	23	Thin	6.1	792	0.94	0	5Y 8/3	Pale yellow	28.5	18.8	9.7	21.6	6.5	-3.2	21.5	17.7	3.8	7	32.5581	1.1	6.21469	5.9
October 6th	Mild	Cloudy	22	5	0	60	Lower	Hard	Purple siltstone	1	2	Thick	14.3	456	0.94	0	7.5YR 5/1	Brownish grey	26.8	20.5	6.3	23.4	4.8	-1.5	22.3	19.3	3	4.5	20.1794	1.2	6.21762	3.3
October 6th	Mild	Cloudy	22	5	0	60	Lower	Soft	White limestone	6	13	Intermediate	9.4	492	0.91	2	2.5Y 8/1	Light grey	25.9	18.3	7.6	22.3	3.9	-3.7	21.6	16.6	5	4.3	19.9074	1.7	10.241	2.6
October 6th	Mild	Cloudy	22	5	0	60	Lower	Hard	Grey siltstone	2	11	Thin	7.3	696	0.92	0	N 7/0	Greyish white	33.4	21.2	12.2	23.5	11.4	-0.8	23.4	17.4	6	10	42.735	3.8	21.8391	6.2
October 6th	Mild	Cloudy	22	5	0	60	Lower	Hard	Purple siltstone	1	1	Intermediate	11.2	408	0.94	0	2.5YR 5/1	Reddish grey	27.9	21.8	6.1	24.7	5.9	-0.2	25.2	19.3	5.9	2.7	10.7143	2.5	12.9534	0.2
October 6th	Mild	Cloudy	22	5	0	60	Lower	Hard	Grey siltstone	2	10	Intermediate	8.4	556	0.94	0	2.5GY 7/1	Light olive grey	27.9	22.2	5.7	23.7	5.9	0.2	22.5	19.8	2.7	5.4	24	2.4	12.1212	3
October 6th	Mild	Cloudy	22	5	0	60	Lower	Soft	Orange limestone	5	19	Intermediate	6.8	528	0.92	0	2.5Y 6/4	Dull yellow	25.8	19.8	6	20.9	3.8	-2.2	22.3	18.4	3.9	3.5	15.6951	1.4	7.6087	2.1
October 6th	Mild	Cloudy	22	5	0	60	Lower	Soft	White limestone	6	14	Thin	6.5	816	0.95	2	2.5Y 8/1	Light grey	25.5	19.1	6.4	19.8	3.5	-2.9	21.3	15.7	5.6	4.2	19.7183	3.4	21.6561	0.8
October 6th	Mild	Cloudy	22	5	0	60	Lower	Soft	Fossiliferous sandstone	4	35	Thick	15	664	0.91	1	2.5Y 5/6	Yellowish brown	24.8	18.8	6	20.3	2.8	-3.2	22.3	18	4.3	2.5	11.2108	0.8	4.44444	1.7
October 6th	Mild	Cloudy	22	5	0	60	Lower	Hard	Purple siltstone	1	5	Thin	6.5	496	0.97	0	10R 6/1	Reddish grey	29.3	24.3	5	25.9	7.3	2.3	24.3	18.9	5.4	5	20.5761	5.4	28.5714	-0.4
October 6th	Mild	Cloudy	22	5	0	60	Lower	Hard	Quartzite	3	28	Intermediate	12.6	464	0.92	0	10YR 8/1	Light grey	22.8	18.5	4.3	19.7	0.8	-3.5	21.7	16.8	4.9	1.1	5.06912	1.7	10.119	-0.6
October 6th	Mild	Cloudy	22	5	0	60	Lower	Soft	Orange limestone	5	24	Thin	6	588	0.94	1	2.5Y 7/4	Light yellow	24.7	19.7	5	21.8	2.7	-2.3	21.9	18.3	3.6	2.8	12.7854	1.4	7.65027	1.4
October 6th	Mild	Cloudy	22	5	0	60	Lower	Hard	Quartzite	3	27	Intermediate	11.1	448	0.94	0	10YR 8/1	Light grey	25.8	19.6	6.2	20.8	3.8	-2.4	22	17.6	4.4	3.8	17.2727	2	11.3636	1.8
October 6th	Mild	Cloudy	22	5	0	60	Lower	Soft	White limestone	6	18	Thick	12	504	0.81	0	2.5Y 8/1	Light grey	24.7	18.3	6.4	20.5	2.7	-3.7	21.6	16.8	4.8	3.1	14.3519	1.5	8.92857	1.6
October 6th	Mild	Cloudy	22	5	0	60	Lower	Soft	Fossiliferous sandstone	4	34	Thick	13.9	520	0.95	0	2.5Y 7/4	Light yellow	26	20.7	5.3	22.8	4	-1.3	23.9	19.5	4.4	2.1	8.78661	1.2	6.15385	0.9
October 6th	Mild	Cloudy	22	5	0	60	Lower	Hard	Purple siltstone	1	6	Thick	13.5	516	1	0	7.5R 5/1	Reddish grey	26.4	21.3	5.1	22.5	4.4	-0.7	23	20.3	2.7	3.4	14.7826	1	4.92611	2.4
October 6th	Mild	Cloudy	22	5	0	60	Lower	Hard	Quartzite	3	26	Thin	7.9	496	0.94	0	10YR 7/2	Greyish yellow brown	26.2	21.2	5	25.2	4.2	-0.8	23.2	19	4.2	3	12.931	2.2	11.5789	0.8
October 6th	Mild	Cloudy	22	5	0	60	Lower	Soft	White limestone	6	17	Intermediate	9.5	448	0.92	1	2.5Y 8/1	Light grey	23.3	19	4.3	21.4	1.3	-3	21.7	18.3	3.4	1.6	7.37327	0.7	3.82514	0.9
October 6th	Mild	Cloudy	22	5	0	60	Lower	Hard	Grey siltstone	2	8	Intermediate	8.1	584	0.97	0	2.5GY 6/1	Olive grey	29.3	22	7.3	24.7	7.3	0	25.3	20.6	4.7	4	15.8103	1.4	6.79612	2.6
October 6th	Mild	Cloudy	22	5	0	60	Lower	Soft	Fossiliferous sandstone	4	32	Intermediate	7.9	536	0.91	0	2.5Y 7/4	Light yellow	25.7	21.4	4.3	23.1	3.7	-0.6	22.3	19.1	3.2	3.4	15.2466	2.3	12.0419	1.1
October 6th	Mild	Cloudy	22	5	0	120	Upper	Hard	Purple siltstone	1	3	Intermediate	11.6	424	0.91	0	10R 5/1	Reddish grey	36.8	25.7	11.1	31.3	14.8	3.7	32	21.9	10.1	4.8	15	3.8	17.3516	1
October 6th	Mild	Cloudy	22	5	0	120	Upper	Soft	Orange limestone	5	21	Thick	12.4	676	0.88	1	2.5Y 8/4	Pale yellow	30.9	20.6	10.3	24.8	8.9	-1.4	28.2	18.6	9.6	2.7	9.57447	2	10.7527	0.7
October 6th	Mild	Cloudy	22	5	0	120	Upper	Hard	Quartzite	3	25	Thin	9.6	636	0.87	0	10YR 6/2	Greyish yellow brown	29.6	22.4	7.2	25.2	7.6	0.4	27.1	18.8	8.3	2.5	9.22509	3.6	19.1489	-1.1
October 6th	Mild	Cloudy	22	5	0	120	Upper	Soft	Fossiliferous sandstone	4	33	Intermediate	8.6	672	0.85	0	2.5Y 6/4	Dull yellow	34.9	24.2	10.7	29.3	12.9	2.2	31.6	22.6	9	3.3	10.443	1.6	7.07965	1.7
October 6th	Mild	Cloudy	22	5	0	120	Upper	Hard	Grey siltstone	2	12	Thin	7.5	580	0.95	0	N 6/0	Grey	37.5	28	9.5	31.6	15.5	6	32.3	24.9	7.4	5.2	16.0991	3.1	12.4498	2.1
October 6th	Mild	Cloudy	22	5	0	120	Upper	Soft	Orange limestone	5	20	Thick	11.7	356	0.92	0	10YR 8/3	Light yellow	30.8	21.5	9.3	24.2	8.8	-0.5	27.8	19.2	8.6	3	10.7914	2.3	11.9792	0.7
October 6th	Mild	Cloudy	22	5	0	120	Upper	Hard	Quartzite	3	29	Thick	14.1	400	0.94	1	10YR 7/2	Greyish yellow brown	28.1	19.4	8.7	23.2	6.1	-2.6	27	18	9	1.1	4.07407	1.4	7.77778	-0.3
October 6th	Mild	Cloudy	22	5	0	120	Upper	Soft	White limestone	6	16	Thick	12.3	460	0.94	1	2.5Y 8/1	Light grey	31.3	21.6	9.7	23.3	9.3	-0.4	29.5	19	10.5	1.8	6.10169	2.6	13.6842	-0.8
October 6th	Mild	Cloudy	22	5	0	120	Upper	Hard	Grey siltstone	2	9	Thick	12.6	624	0.92	0	2.5GY 7/1	Light olive grey	35.5	23.6	11.9	29.6	13.5	1.6	31.3	21.4	9.9	4.2	13.4185	2.2	10.2804	2
October 6th	Mild	Cloudy	22	5	0	120	Upper	Hard	Quartzite	3	30	Thick	14.3	376	0.96	0	10YR 8/1	Light grey	24.9	18.9	6	21.4	2.9	-3.1	21.9	16.9	5	3	13.6986	2	11.8343	1
October 6th	Mild	Cloudy	22	5	0	120	Upper	Hard	Purple siltstone	1	4	Thin	6.4	608	0.94	0	10R 6/1	Reddish grey	33	23.8	9.2	28.4	11	1.8	28.8	20.4	8.4	4.2	14.5833	3.4	16.6667	0.8
October 6th	Mild	Cloudy	22	5	0	120	Upper	Soft	Fossiliferous sandstone	4	36	Thin	7.5	732	0.86	0	2.5Y 7/4	Light yellow	32.3	21.6	10.7	28.1	10.3	-0.4	29.7	22.4	7.3	2.6	8.75421	-0.8	-3.57143	3.4
October 6th	Mild	Cloudy	22	5	0	120	Upper	Soft	Fossiliferous sandstone	4	31	Thin	6.9	588	0.94	0	2.5Y 7/6	Yellowish brown	34.9	23.3	11.6	28.4	12.9	1.3	31.5	20.7	10.8	3.4	10.7937	2.6	12.5604	0.8
October 6th	Mild	Cloudy	22	5	0	120	Upper	Soft	White limestone	6	15	Thin	5.9	612	0.82	1	2.5Y 8/1	Light grey	27.6	21.2	6.4	25.1	5.6	-0.8	24.3	17.9	6.4	3.3	13.5802	3.3	18.4358	0
October 6th	Mild	Cloudy	22	5	0	120	Upper	Soft	Orange limestone	5	22	Intermediate	7.6	632	0.94	0	2.5Y 7/4	Light yellow	34.2	24.7	9.5	29.5	12.2	2.7	30.5	21.1	9.4	3.7	12.1311	3.6	17.0616	0.1
October 6th	Mild	Cloudy	22	5	0	120	Upper	Hard	Grey siltstone	2	7	Thick	12.3	436	0.94	0	N 7/0	Greyish white	33.8	22.3	11.5	29.5	11.8	0.3	30.5	19.3	11.2	3.3	10.8197	3	15.544	0.3
October 6th	Mild	Cloudy	22	5	0	120	Upper	Soft	Orange limestone	5	23	Thin	6.1	808	0.91	0	5Y 8/3	Pale yellow	30.4	23.1	7.3	27.5	8.4	1.1	28.1	20.3	7.8	2.3	8.18505	2.8	13.7931	-0.5
October 6th	Mild	Cloudy	22	5	0	120	Upper	Hard	Purple siltstone	1	2	Thick	14.3	484	0.97	0	7.5YR 5/1	Brownish grey	36.3	24.5	11.8	30.6	14.3	2.5	33.6	21.5	12.1	2.7	8.03571	3	13.9535	-0.3
October 6th	Mild	Cloudy	22	5	0	120	Upper	Soft	White limestone	6	13	Intermediate	9.4	592	0.91	2	2.5Y 8/1	Light grey	28.9	21.5	7.4	25.4	6.9	-0.5	25.5	18.6	6.9	3.4	13.3333	2.9	15.5914	0.5
October 6th	Mild	Cloudy	22	5	0	120	Upper	Hard	Grey siltstone	2	11	Thin	7.3	688	0.94	0	N 7/0	Greyish white	35.3	24.8	10.5	31.3	13.3	2.8	31.6	21.1	10.5	3.7	11.7089	3.7	17.5355	0
October 6th	Mild	Cloudy	22	5	0	120	Upper	Hard	Purple siltstone	1	1	Intermediate	11.2	384	0.92	0	2.5YR 5/1	Reddish grey	34.5	26.4	8.1	32.7	12.5	4.4	31.1	21.6	9.5	3.4	10.9325	4.8	22.2222	-1.4
October 6th	Mild	Cloudy	22	5	0	120	Upper	Hard	Grey siltstone	2	10	Intermediate	8.4	552	0.94	0	2.5GY 7/1	Light olive grey	32.6	24.6	8	30.1	10.6	2.6	29.5	20.5	9	3.1	10.5085	4.1	20	-1
October 6th	Mild	Cloudy	22	5	0	120	Upper	Soft	Orange limestone	5	19	Intermediate	6.8	604	0.94	0	2.5Y 6/4	Dull yellow	33.6	23.7	9.9	29.1	11.6	1.7	30.6	21.1	9.5	3	9.80392	2.6	12.3223	0.4
October 6th	Mild	Cloudy	22	5	0	120	Upper	Soft	White limestone	6	14	Thin	6.5	830	0.97	4	2.5Y 8/1	Light grey	29.2	19.9	9.3	24.7	7.2	-2.1	26.7	17.3	9.4	2.5	9.3633	2.6	15.0289	-0.1
October 6th	Mild	Cloudy	22	5	0	120	Upper	Soft	Fossiliferous sandstone	4	35	Thick	15	704	0.91	0	2.5Y 5/6	Yellowish brown	35.7	24.9	10.8	30.1	13.7	2.9	32.5	22.5	10	3.2	9.84615	2.4	10.6667	0.8
October 6th	Mild	Cloudy	22	5	0	120	Upper	Hard	Purple siltstone	1	5	Thin	6.5	508	0.92	0	10R 6/1	Reddish grey	34.9	25.3	9.6	32	12.9	3.3	31	21.8	9.2	3.9	12.5806	3.5	16.055	0.4
October 6th	Mild	Cloudy	22	5	0	120	Upper	Hard	Quartzite	3	28	Intermediate	12.6	328	0.95	0	10YR 8/1	Light grey	24.1	17.2	6.9	20.5	2.1	-4.8	22.2	17.7	4.5	1.9	8.55856	-0.5	-2.82486	2.4
October 6th	Mild	Cloudy	22	5	0	120	Upper	Soft	Orange limestone	5	24	Thin	6	620	0.94	0	2.5Y 7/4	Light yellow	33.1	25.1	8	27.8	11.1	3.1	29.5	20.8	8.7	3.6	12.2034	4.3	20.6731	-0.7
October 6th	Mild	Cloudy	22	5	0	120	Upper	Hard	Quartzite	3	27	Intermediate	11.1	444	0.94	0	10YR 8/1	Light grey	25.7	20.3	5.4	22.7	3.7	-1.7	23.2	17.3	5.9	2.5	10.7759	3	17.341	-0.5
October 6th	Mild	Cloudy	22	5	0	120	Upper	Soft	White limestone	6	18	Thick	12	544	0.85	1	2.5Y 8/1	Light grey	29.5	21.8	7.7	24.1	7.5	-0.2	25.5	17.7	7.8	4	15.6863	4.1	23.1638	-0.1
October 6th	Mild	Cloudy	22	5	0	120	Upper	Soft	Fossiliferous sandstone	4	34	Thick	13.9	436	0.76	0	2.5Y 7/4	Light yellow	33.3	23.2	10.1	28.4	11.3	1.2	31.4	21.6	9.8	1.9	6.05096	1.6	7.40741	0.3
October 6th	Mild	Cloudy	22	5	0	120	Upper	Hard	Purple siltstone	1	6	Thick	13.5	596	0.94	0	7.5R 5/1	Reddish grey	35.4	24.8	10.6	31.8	13.4	2.8	32.3	22.4	9.9	3.1	9.59752	2.4	10.7143	0.7
October 6th	Mild	Cloudy	22	5	0	120	Upper	Hard	Quartzite	3	26	Thin	7.9	500	0.97	0	10YR 7/2	Greyish yellow brown	27.2	21.6	5.6	22.4	5.2	-0.4	24.3	19.8	4.5	2.9	11.9342	1.8	9.09091	1.1
October 6th	Mild	Cloudy	22	5	0	120	Upper	Soft	White limestone	6	17	Intermediate	9.5	444	0.95	0	2.5Y 8/1	Light grey	28.7	18.3	10.4	24.3	6.7	-3.7	26.2	18.7	7.5	2.5	9.54198	-0.4	-2.13904	2.9
October 6th	Mild	Cloudy	22	5	0	120	Upper	Hard	Grey siltstone	2	8	Intermediate	8.1	592	0.97	0	2.5GY 6/1	Olive grey	33.4	23.2	10.2	29.4	11.4	1.2	31.1	20.8	10.3	2.3	7.3955	2.4	11.5385	-0.1
October 6th	Mild	Cloudy	22	5	0	120	Upper	Soft	Fossiliferous sandstone	4	32	Intermediate	7.9	524	0.92	0	2.5Y 7/4	Light yellow	31.6	22.8	8.8	26.4	9.6	0.8	29.3	20.5	8.8	2.3	7.84983	2.3	11.2195	0
October 6th	Mild	Cloudy	22	5	0	120	Lower	Hard	Purple siltstone	1	3	Intermediate	11.6	354	0.91	0	10R 5/1	Reddish grey	29.8	22.1	7.7	26.2	7.8	0.1	26.4	19.1	7.3	3.4	12.8788	3	15.7068	0.4
October 6th	Mild	Cloudy	22	5	0	120	Lower	Soft	Orange limestone	5	21	Thick	12.4	608	0.91	0	2.5Y 8/4	Pale yellow	23.6	17.8	5.8	19.5	1.6	-4.2	22.3	16.2	6.1	1.3	5.8296	1.6	9.87654	-0.3
October 6th	Mild	Cloudy	22	5	0	120	Lower	Hard	Quartzite	3	25	Thin	9.6	584	0.92	0	10YR 6/2	Greyish yellow brown	28.8	19.3	9.5	23.5	6.8	-2.7	27	17.7	9.3	1.8	6.66667	1.6	9.03955	0.2
October 6th	Mild	Cloudy	22	5	0	120	Lower	Soft	Fossiliferous sandstone	4	33	Intermediate	8.6	680	0.91	0	2.5Y 6/4	Dull yellow	31.5	21	10.5	24.8	9.5	-1	25.4	21	4.4	6.1	24.0157	0	0	6.1
October 6th	Mild	Cloudy	22	5	0	120	Lower	Hard	Grey siltstone	2	12	Thin	7.5	576	0.94	0	N 6/0	Grey	36.2	25.3	10.9	25.8	14.2	3.3	30.3	22	8.3	5.9	19.4719	3.3	15	2.6
October 6th	Mild	Cloudy	22	5	0	120	Lower	Soft	Orange limestone	5	20	Thick	11.7	420	0.97	0	10YR 8/3	Light yellow	22.2	17.6	4.6	19.4	0.2	-4.4	21.2	17.1	4.1	1	4.71698	0.5	2.92398	0.5
October 6th	Mild	Cloudy	22	5	0	120	Lower	Hard	Quartzite	3	29	Thick	14.1	368	0.94	0	10YR 7/2	Greyish yellow brown	23.9	17.9	6	19.5	1.9	-4.1	21.5	15.5	6	2.4	11.1628	2.4	15.4839	0
October 6th	Mild	Cloudy	22	5	0	120	Lower	Soft	White limestone	6	16	Thick	12.3	412	0.94	0	2.5Y 8/1	Light grey	23.8	18.4	5.4	19.8	1.8	-3.6	21.5	16.4	5.1	2.3	10.6977	2	12.1951	0.3
October 6th	Mild	Cloudy	22	5	0	120	Lower	Hard	Grey siltstone	2	9	Thick	12.6	532	0.97	0	2.5GY 7/1	Light olive grey	27.5	23.3	4.2	24.5	5.5	1.3	24.8	20.4	4.4	2.7	10.8871	2.9	14.2157	-0.2
October 6th	Mild	Cloudy	22	5	0	120	Lower	Hard	Quartzite	3	30	Thick	14.3	588	0.9	0	10YR 8/1	Light grey	26	18.2	7.8	21.2	4	-3.8	22.4	16.4	6	3.6	16.0714	1.8	10.9756	1.8
October 6th	Mild	Cloudy	22	5	0	120	Lower	Hard	Purple siltstone	1	4	Thin	6.4	608	0.95	0	10R 6/1	Reddish grey	33.2	24.2	9	26.1	11.2	2.2	30	21.1	8.9	3.2	10.6667	3.1	14.6919	0.1
October 6th	Mild	Cloudy	22	5	0	120	Lower	Soft	Fossiliferous sandstone	4	36	Thin	7.5	742	0.88	1	2.5Y 7/4	Light yellow	32.2	21.1	11.1	25.5	10.2	-0.9	28.2	19.1	9.1	4	14.1844	2	10.4712	2
October 6th	Mild	Cloudy	22	5	0	120	Lower	Soft	Fossiliferous sandstone	4	31	Thin	6.9	580	0.94	0	2.5Y 7/6	Yellowish brown	32.7	22.3	10.4	25.2	10.7	0.3	29.1	19.8	9.3	3.6	12.3711	2.5	12.6263	1.1
October 6th	Mild	Cloudy	22	5	0	120	Lower	Soft	White limestone	6	15	Thin	5.9	564	0.92	2	2.5Y 8/1	Light grey	28.4	20.6	7.8	21.6	6.4	-1.4	22.7	17.3	5.4	5.7	25.1101	3.3	19.0751	2.4
October 6th	Mild	Cloudy	22	5	0	120	Lower	Soft	Orange limestone	5	22	Intermediate	7.6	584	0.94	0	2.5Y 7/4	Light yellow	28.9	21.8	7.1	23.9	6.9	-0.2	25.9	19.4	6.5	3	11.583	2.4	12.3711	0.6
October 6th	Mild	Cloudy	22	5	0	120	Lower	Hard	Grey siltstone	2	7	Thick	12.3	544	0.95	0	N 7/0	Greyish white	28.7	22.7	6	24.5	6.7	0.7	24.6	20.5	4.1	4.1	16.6667	2.2	10.7317	1.9
October 6th	Mild	Cloudy	22	5	0	120	Lower	Soft	Orange limestone	5	23	Thin	6.1	792	0.94	0	5Y 8/3	Pale yellow	30.4	21.7	8.7	24.2	8.4	-0.3	28.5	18.8	9.7	1.9	6.66667	2.9	15.4255	-1
October 6th	Mild	Cloudy	22	5	0	120	Lower	Hard	Purple siltstone	1	2	Thick	14.3	456	0.94	0	7.5YR 5/1	Brownish grey	27.4	22.1	5.3	24.9	5.4	0.1	26.8	20.5	6.3	0.6	2.23881	1.6	7.80488	-1
October 6th	Mild	Cloudy	22	5	0	120	Lower	Soft	White limestone	6	13	Intermediate	9.4	492	0.91	2	2.5Y 8/1	Light grey	27.2	19.2	8	23.6	5.2	-2.8	25.9	18.3	7.6	1.3	5.01931	0.9	4.91803	0.4
October 6th	Mild	Cloudy	22	5	0	120	Lower	Hard	Grey siltstone	2	11	Thin	7.3	696	0.92	0	N 7/0	Greyish white	34.8	24.3	10.5	25.9	12.8	2.3	33.4	21.2	12.2	1.4	4.19162	3.1	14.6226	-1.7
October 6th	Mild	Cloudy	22	5	0	120	Lower	Hard	Purple siltstone	1	1	Intermediate	11.2	408	0.94	0	2.5YR 5/1	Reddish grey	34.7	27.1	7.6	27.8	12.7	5.1	27.9	21.8	6.1	6.8	24.3728	5.3	24.3119	1.5
October 6th	Mild	Cloudy	22	5	0	120	Lower	Hard	Grey siltstone	2	10	Intermediate	8.4	556	0.94	0	2.5GY 7/1	Light olive grey	31	24.5	6.5	27.3	9	2.5	27.9	22.2	5.7	3.1	11.1111	2.3	10.3604	0.8
October 6th	Mild	Cloudy	22	5	0	120	Lower	Soft	Orange limestone	5	19	Intermediate	6.8	528	0.92	0	2.5Y 6/4	Dull yellow	31.4	22.8	8.6	23.3	9.4	0.8	25.8	19.8	6	5.6	21.7054	3	15.1515	2.6
October 6th	Mild	Cloudy	22	5	0	120	Lower	Soft	White limestone	6	14	Thin	6.5	816	0.95	2	2.5Y 8/1	Light grey	28.2	20.5	7.7	20.9	6.2	-1.5	25.5	19.1	6.4	2.7	10.5882	1.4	7.32984	1.3
October 6th	Mild	Cloudy	22	5	0	120	Lower	Soft	Fossiliferous sandstone	4	35	Thick	15	664	0.91	1	2.5Y 5/6	Yellowish brown	29.5	22.4	7.1	27	7.5	0.4	24.8	18.8	6	4.7	18.9516	3.6	19.1489	1.1
October 6th	Mild	Cloudy	22	5	0	120	Lower	Hard	Purple siltstone	1	5	Thin	6.5	496	0.97	0	10R 6/1	Reddish grey	32.2	26.4	5.8	28.1	10.2	4.4	29.3	24.3	5	2.9	9.89761	2.1	8.64198	0.8
October 6th	Mild	Cloudy	22	5	0	120	Lower	Hard	Quartzite	3	28	Intermediate	12.6	464	0.92	0	10YR 8/1	Light grey	25.3	20.3	5	21.7	3.3	-1.7	22.8	18.5	4.3	2.5	10.9649	1.8	9.72973	0.7
October 6th	Mild	Cloudy	22	5	0	120	Lower	Soft	Orange limestone	5	24	Thin	6	588	0.94	1	2.5Y 7/4	Light yellow	32	23.1	8.9	24.9	10	1.1	24.7	19.7	5	7.3	29.5547	3.4	17.2589	3.9
October 6th	Mild	Cloudy	22	5	0	120	Lower	Hard	Quartzite	3	27	Intermediate	11.1	448	0.94	0	10YR 8/1	Light grey	27.5	21.6	5.9	23	5.5	-0.4	25.8	19.6	6.2	1.7	6.58915	2	10.2041	-0.3
October 6th	Mild	Cloudy	22	5	0	120	Lower	Soft	White limestone	6	18	Thick	12	504	0.81	0	2.5Y 8/1	Light grey	25.9	19.6	6.3	21.2	3.9	-2.4	24.7	18.3	6.4	1.2	4.8583	1.3	7.10383	-0.1
October 6th	Mild	Cloudy	22	5	0	120	Lower	Soft	Fossiliferous sandstone	4	34	Thick	13.9	520	0.95	0	2.5Y 7/4	Light yellow	28.1	21.2	6.9	25	6.1	-0.8	26	20.7	5.3	2.1	8.07692	0.5	2.41546	1.6
October 6th	Mild	Cloudy	22	5	0	120	Lower	Hard	Purple siltstone	1	6	Thick	13.5	516	1	0	7.5R 5/1	Reddish grey	28	23.2	4.8	24.9	6	1.2	26.4	21.3	5.1	1.6	6.06061	1.9	8.92019	-0.3
October 6th	Mild	Cloudy	22	5	0	120	Lower	Hard	Quartzite	3	26	Thin	7.9	496	0.94	0	10YR 7/2	Greyish yellow brown	29.6	22.3	7.3	27.5	7.6	0.3	26.2	21.2	5	3.4	12.9771	1.1	5.18868	2.3
October 6th	Mild	Cloudy	22	5	0	120	Lower	Soft	White limestone	6	17	Intermediate	9.5	448	0.92	1	2.5Y 8/1	Light grey	25.9	20.1	5.8	22.6	3.9	-1.9	23.3	19	4.3	2.6	11.1588	1.1	5.78947	1.5
October 6th	Mild	Cloudy	22	5	0	120	Lower	Hard	Grey siltstone	2	8	Intermediate	8.1	584	0.97	0	2.5GY 6/1	Olive grey	30.9	23.8	7.1	27.7	8.9	1.8	29.3	22	7.3	1.6	5.46075	1.8	8.18182	-0.2
October 6th	Mild	Cloudy	22	5	0	120	Lower	Soft	Fossiliferous sandstone	4	32	Intermediate	7.9	536	0.91	0	2.5Y 7/4	Light yellow	28.2	23.4	4.8	25.8	6.2	1.4	25.7	21.4	4.3	2.5	9.72763	2	9.34579	0.5
October 6th	Mild	Cloudy	22	5	2	180	Upper	Hard	Purple siltstone	1	3	Intermediate	11.6	424	0.91	0	10R 5/1	Reddish grey	39.3	29.2	10.1	35.3	17.3	7.2	36.8	25.7	11.1	2.5	6.79348	3.5	13.6187	-1
October 6th	Mild	Cloudy	22	5	2	180	Upper	Soft	Orange limestone	5	21	Thick	12.4	676	0.88	1	2.5Y 8/4	Pale yellow	32.6	25.3	7.3	27.5	10.6	3.3	30.9	20.6	10.3	1.7	5.50162	4.7	22.8155	-3
October 6th	Mild	Cloudy	22	5	2	180	Upper	Hard	Quartzite	3	25	Thin	9.6	636	0.87	0	10YR 6/2	Greyish yellow brown	31.7	25.4	6.3	28	9.7	3.4	29.6	22.4	7.2	2.1	7.09459	3	13.3929	-0.9
October 6th	Mild	Cloudy	22	5	2	180	Upper	Soft	Fossiliferous sandstone	4	33	Intermediate	8.6	672	0.85	0	2.5Y 6/4	Dull yellow	36.5	25.4	11.1	32.2	14.5	3.4	34.9	24.2	10.7	1.6	4.58453	1.2	4.95868	0.4
October 6th	Mild	Cloudy	22	5	2	180	Upper	Hard	Grey siltstone	2	12	Thin	7.5	580	0.95	0	N 6/0	Grey	40.1	30.5	9.6	34.7	18.1	8.5	37.5	28	9.5	2.6	6.93333	2.5	8.92857	0.1
October 6th	Mild	Cloudy	22	5	2	180	Upper	Soft	Orange limestone	5	20	Thick	11.7	356	0.92	0	10YR 8/3	Light yellow	32.5	23.6	8.9	27.3	10.5	1.6	30.8	21.5	9.3	1.7	5.51948	2.1	9.76744	-0.4
October 6th	Mild	Cloudy	22	5	2	180	Upper	Hard	Quartzite	3	29	Thick	14.1	400	0.94	1	10YR 7/2	Greyish yellow brown	28.8	21.9	6.9	25.4	6.8	-0.1	28.1	19.4	8.7	0.7	2.4911	2.5	12.8866	-1.8
October 6th	Mild	Cloudy	22	5	2	180	Upper	Soft	White limestone	6	16	Thick	12.3	460	0.94	1	2.5Y 8/1	Light grey	30.2	21.6	8.6	25.7	8.2	-0.4	31.3	21.6	9.7	-1.1	-3.51438	0	0	-1.1
October 6th	Mild	Cloudy	22	5	2	180	Upper	Hard	Grey siltstone	2	9	Thick	12.6	624	0.92	0	2.5GY 7/1	Light olive grey	37.5	26.7	10.8	33.1	15.5	4.7	35.5	23.6	11.9	2	5.6338	3.1	13.1356	-1.1
October 6th	Mild	Cloudy	22	5	2	180	Upper	Hard	Quartzite	3	30	Thick	14.3	376	0.96	0	10YR 8/1	Light grey	27.4	20.1	7.3	23.6	5.4	-1.9	24.9	18.9	6	2.5	10.0402	1.2	6.34921	1.3
October 6th	Mild	Cloudy	22	5	2	180	Upper	Hard	Purple siltstone	1	4	Thin	6.4	608	0.94	0	10R 6/1	Reddish grey	34.7	26.7	8	30.4	12.7	4.7	33	23.8	9.2	1.7	5.15152	2.9	12.1849	-1.2
October 6th	Mild	Cloudy	22	5	2	180	Upper	Soft	Fossiliferous sandstone	4	36	Thin	7.5	732	0.86	0	2.5Y 7/4	Light yellow	33.9	25.4	8.5	30.1	11.9	3.4	32.3	21.6	10.7	1.6	4.95356	3.8	17.5926	-2.2
October 6th	Mild	Cloudy	22	5	2	180	Upper	Soft	Fossiliferous sandstone	4	31	Thin	6.9	588	0.94	0	2.5Y 7/6	Yellowish brown	37.3	25.7	11.6	32.5	15.3	3.7	34.9	23.3	11.6	2.4	6.87679	2.4	10.3004	0
October 6th	Mild	Cloudy	22	5	2	180	Upper	Soft	White limestone	6	15	Thin	5.9	612	0.82	1	2.5Y 8/1	Light grey	31	24	7	28	9	2	27.6	21.2	6.4	3.4	12.3188	2.8	13.2075	0.6
October 6th	Mild	Cloudy	22	5	2	180	Upper	Soft	Orange limestone	5	22	Intermediate	7.6	632	0.94	0	2.5Y 7/4	Light yellow	35.9	26.9	9	32.1	13.9	4.9	34.2	24.7	9.5	1.7	4.97076	2.2	8.90688	-0.5
October 6th	Mild	Cloudy	22	5	2	180	Upper	Hard	Grey siltstone	2	7	Thick	12.3	436	0.94	0	N 7/0	Greyish white	35.3	27.7	7.6	32.3	13.3	5.7	33.8	22.3	11.5	1.5	4.43787	5.4	24.2152	-3.9
October 6th	Mild	Cloudy	22	5	2	180	Upper	Soft	Orange limestone	5	23	Thin	6.1	808	0.91	0	5Y 8/3	Pale yellow	32.8	25.4	7.4	29.4	10.8	3.4	30.4	23.1	7.3	2.4	7.89474	2.3	9.95671	0.1
October 6th	Mild	Cloudy	22	5	2	180	Upper	Hard	Purple siltstone	1	2	Thick	14.3	484	0.97	0	7.5YR 5/1	Brownish grey	37.7	27.8	9.9	34.1	15.7	5.8	36.3	24.5	11.8	1.4	3.85675	3.3	13.4694	-1.9
October 6th	Mild	Cloudy	22	5	2	180	Upper	Soft	White limestone	6	13	Intermediate	9.4	592	0.91	2	2.5Y 8/1	Light grey	27.5	20.4	7.1	24.4	5.5	-1.6	28.9	21.5	7.4	-1.4	-4.84429	-1.1	-5.11628	-0.3
October 6th	Mild	Cloudy	22	5	2	180	Upper	Hard	Grey siltstone	2	11	Thin	7.3	688	0.94	0	N 7/0	Greyish white	37.3	27.3	10	33.2	15.3	5.3	35.3	24.8	10.5	2	5.66572	2.5	10.0806	-0.5
October 6th	Mild	Cloudy	22	5	2	180	Upper	Hard	Purple siltstone	1	1	Intermediate	11.2	384	0.92	0	2.5YR 5/1	Reddish grey	36.2	29.1	7.1	34.5	14.2	7.1	34.5	26.4	8.1	1.7	4.92754	2.7	10.2273	-1
October 6th	Mild	Cloudy	22	5	2	180	Upper	Hard	Grey siltstone	2	10	Intermediate	8.4	552	0.94	0	2.5GY 7/1	Light olive grey	34.6	27.5	7.1	31.8	12.6	5.5	32.6	24.6	8	2	6.13497	2.9	11.7886	-0.9
October 6th	Mild	Cloudy	22	5	2	180	Upper	Soft	Orange limestone	5	19	Intermediate	6.8	604	0.94	0	2.5Y 6/4	Dull yellow	35	25.8	9.2	30.7	13	3.8	33.6	23.7	9.9	1.4	4.16667	2.1	8.86076	-0.7
October 6th	Mild	Cloudy	22	5	2	180	Upper	Soft	White limestone	6	14	Thin	6.5	830	0.97	4	2.5Y 8/1	Light grey	30.8	24.2	6.6	27.9	8.8	2.2	29.2	19.9	9.3	1.6	5.47945	4.3	21.608	-2.7
October 6th	Mild	Cloudy	22	5	2	180	Upper	Soft	Fossiliferous sandstone	4	35	Thick	15	704	0.91	0	2.5Y 5/6	Yellowish brown	37	28.8	8.2	33.8	15	6.8	35.7	24.9	10.8	1.3	3.64146	3.9	15.6627	-2.6
October 6th	Mild	Cloudy	22	5	2	180	Upper	Hard	Purple siltstone	1	5	Thin	6.5	508	0.92	0	10R 6/1	Reddish grey	36.7	27.7	9	34.6	14.7	5.7	34.9	25.3	9.6	1.8	5.15759	2.4	9.48617	-0.6
October 6th	Mild	Cloudy	22	5	2	180	Upper	Hard	Quartzite	3	28	Intermediate	12.6	328	0.95	0	10YR 8/1	Light grey	25.7	18.7	7	22.5	3.7	-3.3	24.1	17.2	6.9	1.6	6.639	1.5	8.72093	0.1
October 6th	Mild	Cloudy	22	5	2	180	Upper	Soft	Orange limestone	5	24	Thin	6	620	0.94	0	2.5Y 7/4	Light yellow	35	26.8	8.2	30.1	13	4.8	33.1	25.1	8	1.9	5.74018	1.7	6.77291	0.2
October 6th	Mild	Cloudy	22	5	2	180	Upper	Hard	Quartzite	3	27	Intermediate	11.1	444	0.94	0	10YR 8/1	Light grey	26.5	22.4	4.1	24.9	4.5	0.4	25.7	20.3	5.4	0.8	3.11284	2.1	10.3448	-1.3
October 6th	Mild	Cloudy	22	5	2	180	Upper	Soft	White limestone	6	18	Thick	12	544	0.85	1	2.5Y 8/1	Light grey	30.5	21	9.5	27.9	8.5	-1	29.5	21.8	7.7	1	3.38983	-0.8	-3.66972	1.8
October 6th	Mild	Cloudy	22	5	2	180	Upper	Soft	Fossiliferous sandstone	4	34	Thick	13.9	436	0.76	0	2.5Y 7/4	Light yellow	35.2	25.8	9.4	30.1	13.2	3.8	33.3	23.2	10.1	1.9	5.70571	2.6	11.2069	-0.7
October 6th	Mild	Cloudy	22	5	2	180	Upper	Hard	Purple siltstone	1	6	Thick	13.5	596	0.94	0	7.5R 5/1	Reddish grey	37.6	27.9	9.7	33.6	15.6	5.9	35.4	24.8	10.6	2.2	6.21469	3.1	12.5	-0.9
October 6th	Mild	Cloudy	22	5	2	180	Upper	Hard	Quartzite	3	26	Thin	7.9	500	0.97	0	10YR 7/2	Greyish yellow brown	28.6	22.6	6	23.5	6.6	0.6	27.2	21.6	5.6	1.4	5.14706	1	4.62963	0.4
October 6th	Mild	Cloudy	22	5	2	180	Upper	Soft	White limestone	6	17	Intermediate	9.5	444	0.95	0	2.5Y 8/1	Light grey	29.1	21.3	7.8	25.2	7.1	-0.7	28.7	18.3	10.4	0.4	1.39373	3	16.3934	-2.6
October 6th	Mild	Cloudy	22	5	2	180	Upper	Hard	Grey siltstone	2	8	Intermediate	8.1	592	0.97	0	2.5GY 6/1	Olive grey	35.5	24.8	10.7	32	13.5	2.8	33.4	23.2	10.2	2.1	6.28743	1.6	6.89655	0.5
October 6th	Mild	Cloudy	22	5	2	180	Upper	Soft	Fossiliferous sandstone	4	32	Intermediate	7.9	524	0.92	0	2.5Y 7/4	Light yellow	32.7	25.4	7.3	28.6	10.7	3.4	31.6	22.8	8.8	1.1	3.48101	2.6	11.4035	-1.5
October 6th	Mild	Cloudy	22	5	2	180	Lower	Hard	Purple siltstone	1	3	Intermediate	11.6	354	0.91	0	10R 5/1	Reddish grey	32.3	24	8.3	28.3	10.3	2	29.8	22.1	7.7	2.5	8.38926	1.9	8.59729	0.6
October 6th	Mild	Cloudy	22	5	2	180	Lower	Soft	Orange limestone	5	21	Thick	12.4	608	0.91	0	2.5Y 8/4	Pale yellow	25.5	18.6	6.9	21.1	3.5	-3.4	23.6	17.8	5.8	1.9	8.05085	0.8	4.49438	1.1
October 6th	Mild	Cloudy	22	5	2	180	Lower	Hard	Quartzite	3	25	Thin	9.6	584	0.92	0	10YR 6/2	Greyish yellow brown	31.1	21.4	9.7	25	9.1	-0.6	28.8	19.3	9.5	2.3	7.98611	2.1	10.8808	0.2
October 6th	Mild	Cloudy	22	5	2	180	Lower	Soft	Fossiliferous sandstone	4	33	Intermediate	8.6	680	0.91	0	2.5Y 6/4	Dull yellow	32.8	22.5	10.3	19.8	10.8	0.5	31.5	21	10.5	1.3	4.12698	1.5	7.14286	-0.2
October 6th	Mild	Cloudy	22	5	2	180	Lower	Hard	Grey siltstone	2	12	Thin	7.5	576	0.94	0	N 6/0	Grey	36.8	27.7	9.1	28.4	14.8	5.7	36.2	25.3	10.9	0.6	1.65746	2.4	9.48617	-1.8
October 6th	Mild	Cloudy	22	5	2	180	Lower	Soft	Orange limestone	5	20	Thick	11.7	420	0.97	0	10YR 8/3	Light yellow	24.6	18.8	5.8	19.8	2.6	-3.2	22.2	17.6	4.6	2.4	10.8108	1.2	6.81818	1.2
October 6th	Mild	Cloudy	22	5	2	180	Lower	Hard	Quartzite	3	29	Thick	14.1	368	0.94	0	10YR 7/2	Greyish yellow brown	26.1	19.3	6.8	21.1	4.1	-2.7	23.9	17.9	6	2.2	9.20502	1.4	7.82123	0.8
October 6th	Mild	Cloudy	22	5	2	180	Lower	Soft	White limestone	6	16	Thick	12.3	412	0.94	0	2.5Y 8/1	Light grey	25	19.6	5.4	21	3	-2.4	23.8	18.4	5.4	1.2	5.04202	1.2	6.52174	0
October 6th	Mild	Cloudy	22	5	2	180	Lower	Hard	Grey siltstone	2	9	Thick	12.6	532	0.97	0	2.5GY 7/1	Light olive grey	29.4	25	4.4	26.2	7.4	3	27.5	23.3	4.2	1.9	6.90909	1.7	7.29614	0.2
October 6th	Mild	Cloudy	22	5	2	180	Lower	Hard	Quartzite	3	30	Thick	14.3	588	0.9	0	10YR 8/1	Light grey	28.3	19.6	8.7	22	6.3	-2.4	26	18.2	7.8	2.3	8.84615	1.4	7.69231	0.9
October 6th	Mild	Cloudy	22	5	2	180	Lower	Hard	Purple siltstone	1	4	Thin	6.4	608	0.95	0	10R 6/1	Reddish grey	35	26	9	28.2	13	4	33.2	24.2	9	1.8	5.42169	1.8	7.43802	0
October 6th	Mild	Cloudy	22	5	2	180	Lower	Soft	Fossiliferous sandstone	4	36	Thin	7.5	742	0.88	1	2.5Y 7/4	Light yellow	33	22.9	10.1	25.9	11	0.9	32.2	21.1	11.1	0.8	2.48447	1.8	8.53081	-1
October 6th	Mild	Cloudy	22	5	2	180	Lower	Soft	Fossiliferous sandstone	4	31	Thin	6.9	580	0.94	0	2.5Y 7/6	Yellowish brown	32.2	23	9.2	25.4	10.2	1	32.7	22.3	10.4	-0.5	-1.52905	0.7	3.13901	-1.2
October 6th	Mild	Cloudy	22	5	2	180	Lower	Soft	White limestone	6	15	Thin	5.9	564	0.92	2	2.5Y 8/1	Light grey	30.3	22	8.3	23.5	8.3	0	28.4	20.6	7.8	1.9	6.69014	1.4	6.79612	0.5
October 6th	Mild	Cloudy	22	5	2	180	Lower	Soft	Orange limestone	5	22	Intermediate	7.6	584	0.94	0	2.5Y 7/4	Light yellow	32.4	21.9	10.5	25.5	10.4	-0.1	28.9	21.8	7.1	3.5	12.1107	0.1	0.458716	3.4
October 6th	Mild	Cloudy	22	5	2	180	Lower	Hard	Grey siltstone	2	7	Thick	12.3	544	0.95	0	N 7/0	Greyish white	31.7	24.8	6.9	26.6	9.7	2.8	28.7	22.7	6	3	10.453	2.1	9.2511	0.9
October 6th	Mild	Cloudy	22	5	2	180	Lower	Soft	Orange limestone	5	23	Thin	6.1	792	0.94	0	5Y 8/3	Pale yellow	31.3	23.3	8	25.5	9.3	1.3	30.4	21.7	8.7	0.9	2.96053	1.6	7.37327	-0.7
October 6th	Mild	Cloudy	22	5	2	180	Lower	Hard	Purple siltstone	1	2	Thick	14.3	456	0.94	0	7.5YR 5/1	Brownish grey	31.2	26.4	4.8	29	9.2	4.4	27.4	22.1	5.3	3.8	13.8686	4.3	19.457	-0.5
October 6th	Mild	Cloudy	22	5	2	180	Lower	Soft	White limestone	6	13	Intermediate	9.4	492	0.91	2	2.5Y 8/1	Light grey	27.3	20.6	6.7	25.3	5.3	-1.4	27.2	19.2	8	0.1	0.367647	1.4	7.29167	-1.3
[truncated: 5,417 more rows]

## Sheet: Calibration trial 1
Sample number	Rock type	Hardness	Tag number	Surface	Thickness category	Actual thickness (cm)	Surface area (cm²)	Rugosity	Microhabitats >13 mm	Colour code	Descriptive colour	Time	TIC Temp	LAS Temp
1	Purple siltstone	Hard	2	Upper	Thick	14.3	484	0.97	0	7.5YR 5/1	Brownish grey	60	16	13.6
2	Purple siltstone	Hard	3	Upper	Intermediate	11.6	424	0.91	0	10R 5/1	Reddish grey	60	14.3	12.1
3	Purple siltstone	Hard	4	Upper	Thin	6.4	608	0.94	0	10R 6/1	Reddish grey	60	14.5	11.4
4	Grey siltstone	Hard	7	Upper	Thick	12.3	436	0.94	0	N 7/0	Greyish white	60	14.5	12.6
5	Grey siltstone	Hard	9	Upper	Thick	12.6	624	0.92	0	2.5GY 7/1	Light olive grey	60	14.1	12.2
6	Grey siltstone	Hard	12	Upper	Thin	7.5	580	0.95	0	N 6/0	Grey	60	14.2	12.5
7	White fossiliferous limestone	Soft	15	Upper	Thin	5.9	612	0.82	1	2.5Y 8/1	Light grey	60	14.8	11.3
8	White fossiliferous limestone	Soft	16	Upper	Thick	12.3	460	0.94	1	2.5Y 8/1	Light grey	60	13	11
9	Orange fossiliferous limestone	Soft	20	Upper	Thick	11.7	356	0.92	0	10YR 8/3	Light yellow	60	13.3	11.3
10	Orange fossiliferous limestone	Soft	21	Upper	Thick	12.4	676	0.88	1	2.5Y 8/4	Pale yellow	60	14.3	11.5
11	Orange fossiliferous limestone	Soft	22	Upper	Intermediate	7.6	632	0.94	0	2.5Y 7/4	Light yellow	60	14.8	11.7
12	Orange fossiliferous limestone	Soft	23	Upper	Thin	6.1	808	0.91	0	5Y 8/3	Pale yellow	60	14.8	12.3
13	Quartzite	Hard	25	Upper	Thin	9.6	636	0.87	0	10YR 6/2	Greyish yellow brown	60	12.2	11
14	Quartzite	Hard	29	Upper	Thick	14.1	400	0.94	1	10YR 7/2	Greyish yellow brown	60	12.6	11.1
15	Quartzite	Hard	30	Upper	Thick	14.3	376	0.96	0	10YR 8/1	Light grey	60	12.4	10.3
16	Fossiliferous sandstone	Soft	31	Upper	Thin	6.9	588	0.94	0	2.5Y 7/6	Yellowish brown	60	14.6	12
17	Fossiliferous sandstone	Soft	33	Upper	Intermediate	8.6	672	0.85	0	2.5Y 6/4	Dull yellow	60	13.6	10.9
18	Fossiliferous sandstone	Soft	36	Upper	Thin	7.5	732	0.86	0	2.5Y 7/4	Light yellow	60	14.2	11.5
1	Purple siltstone	Hard	2	Upper	Thick	14.3	484	0.97	0	7.5YR 5/1	Brownish grey	120	19	15
2	Purple siltstone	Hard	3	Upper	Intermediate	11.6	424	0.91	0	10R 5/1	Reddish grey	120	17.1	14.3
3	Purple siltstone	Hard	4	Upper	Thin	6.4	608	0.94	0	10R 6/1	Reddish grey	120	17.5	13.7
4	Grey siltstone	Hard	7	Upper	Thick	12.3	436	0.94	0	N 7/0	Greyish white	120	17.7	14.4
5	Grey siltstone	Hard	9	Upper	Thick	12.6	624	0.92	0	2.5GY 7/1	Light olive grey	120	17	14
6	Grey siltstone	Hard	12	Upper	Thin	7.5	580	0.95	0	N 6/0	Grey	120	17.4	14.1
7	White fossiliferous limestone	Soft	15	Upper	Thin	5.9	612	0.82	1	2.5Y 8/1	Light grey	120	16.1	11.8
8	White fossiliferous limestone	Soft	16	Upper	Thick	12.3	460	0.94	1	2.5Y 8/1	Light grey	120	15.4	12
9	Orange fossiliferous limestone	Soft	20	Upper	Thick	11.7	356	0.92	0	10YR 8/3	Light yellow	120	15.8	12.2
10	Orange fossiliferous limestone	Soft	21	Upper	Thick	12.4	676	0.88	1	2.5Y 8/4	Pale yellow	120	15	12.4
11	Orange fossiliferous limestone	Soft	22	Upper	Intermediate	7.6	632	0.94	0	2.5Y 7/4	Light yellow	120	17.3	13.1
12	Orange fossiliferous limestone	Soft	23	Upper	Thin	6.1	808	0.91	0	5Y 8/3	Pale yellow	120	16.2	12.6
13	Quartzite	Hard	25	Upper	Thin	9.6	636	0.87	0	10YR 6/2	Greyish yellow brown	120	15.2	12.6
14	Quartzite	Hard	29	Upper	Thick	14.1	400	0.94	1	10YR 7/2	Greyish yellow brown	120	14.8	12.1
15	Quartzite	Hard	30	Upper	Thick	14.3	376	0.96	0	10YR 8/1	Light grey	120	14	11.6
16	Fossiliferous sandstone	Soft	31	Upper	Thin	6.9	588	0.94	0	2.5Y 7/6	Yellowish brown	120	16.8	13.2
17	Fossiliferous sandstone	Soft	33	Upper	Intermediate	8.6	672	0.85	0	2.5Y 6/4	Dull yellow	120	15	12.3
18	Fossiliferous sandstone	Soft	36	Upper	Thin	7.5	732	0.86	0	2.5Y 7/4	Light yellow	120	16.8	13
1	Purple siltstone	Hard	2	Upper	Thick	14.3	484	0.97	0	7.5YR 5/1	Brownish grey	180	20.6	17.9
2	Purple siltstone	Hard	3	Upper	Intermediate	11.6	424	0.91	0	10R 5/1	Reddish grey	180	19.5	18.2
3	Purple siltstone	Hard	4	Upper	Thin	6.4	608	0.94	0	10R 6/1	Reddish grey	180	19	16.4
4	Grey siltstone	Hard	7	Upper	Thick	12.3	436	0.94	0	N 7/0	Greyish white	180	19.5	16.7
5	Grey siltstone	Hard	9	Upper	Thick	12.6	624	0.92	0	2.5GY 7/1	Light olive grey	180	19.4	16.7
6	Grey siltstone	Hard	12	Upper	Thin	7.5	580	0.95	0	N 6/0	Grey	180	20	17.8
7	White fossiliferous limestone	Soft	15	Upper	Thin	5.9	612	0.82	1	2.5Y 8/1	Light grey	180	17.2	14.6
8	White fossiliferous limestone	Soft	16	Upper	Thick	12.3	460	0.94	1	2.5Y 8/1	Light grey	180	16.6	13.3
9	Orange fossiliferous limestone	Soft	20	Upper	Thick	11.7	356	0.92	0	10YR 8/3	Light yellow	180	17.3	14.9
10	Orange fossiliferous limestone	Soft	21	Upper	Thick	12.4	676	0.88	1	2.5Y 8/4	Pale yellow	180	17	15.3
11	Orange fossiliferous limestone	Soft	22	Upper	Intermediate	7.6	632	0.94	0	2.5Y 7/4	Light yellow	180	18.6	15.6
12	Orange fossiliferous limestone	Soft	23	Upper	Thin	6.1	808	0.91	0	5Y 8/3	Pale yellow	180	18.1	15.3
13	Quartzite	Hard	25	Upper	Thin	9.6	636	0.87	0	10YR 6/2	Greyish yellow brown	180	17.2	15.7
14	Quartzite	Hard	29	Upper	Thick	14.1	400	0.94	1	10YR 7/2	Greyish yellow brown	180	16.4	14.9
15	Quartzite	Hard	30	Upper	Thick	14.3	376	0.96	0	10YR 8/1	Light grey	180	15.1	13.3
16	Fossiliferous sandstone	Soft	31	Upper	Thin	6.9	588	0.94	0	2.5Y 7/6	Yellowish brown	180	17.8	15
17	Fossiliferous sandstone	Soft	33	Upper	Intermediate	8.6	672	0.85	0	2.5Y 6/4	Dull yellow	180	17.1	15.4
18	Fossiliferous sandstone	Soft	36	Upper	Thin	7.5	732	0.86	0	2.5Y 7/4	Light yellow	180	18.2	15.5
1	Purple siltstone	Hard	2	Upper	Thick	14.3	484	0.97	0	7.5YR 5/1	Brownish grey	240	19.9	17.8
2	Purple siltstone	Hard	3	Upper	Intermediate	11.6	424	0.91	0	10R 5/1	Reddish grey	240	19.5	17.8
3	Purple siltstone	Hard	4	Upper	Thin	6.4	608	0.94	0	10R 6/1	Reddish grey	240	18.1	16
4	Grey siltstone	Hard	7	Upper	Thick	12.3	436	0.94	0	N 7/0	Greyish white	240	18.8	17.1
5	Grey siltstone	Hard	9	Upper	Thick	12.6	624	0.92	0	2.5GY 7/1	Light olive grey	240	19.2	16.6
6	Grey siltstone	Hard	12	Upper	Thin	7.5	580	0.95	0	N 6/0	Grey	240	19.4	16.7
7	White fossiliferous limestone	Soft	15	Upper	Thin	5.9	612	0.82	1	2.5Y 8/1	Light grey	240	16.2	14.1
8	White fossiliferous limestone	Soft	16	Upper	Thick	12.3	460	0.94	1	2.5Y 8/1	Light grey	240	15.8	13
9	Orange fossiliferous limestone	Soft	20	Upper	Thick	11.7	356	0.92	0	10YR 8/3	Light yellow	240	16.1	13
10	Orange fossiliferous limestone	Soft	21	Upper	Thick	12.4	676	0.88	1	2.5Y 8/4	Pale yellow	240	16.1	14.2
11	Orange fossiliferous limestone	Soft	22	Upper	Intermediate	7.6	632	0.94	0	2.5Y 7/4	Light yellow	240	17.6	15.3
12	Orange fossiliferous limestone	Soft	23	Upper	Thin	6.1	808	0.91	0	5Y 8/3	Pale yellow	240	17.1	15.4
13	Quartzite	Hard	25	Upper	Thin	9.6	636	0.87	0	10YR 6/2	Greyish yellow brown	240	17.3	15.1
14	Quartzite	Hard	29	Upper	Thick	14.1	400	0.94	1	10YR 7/2	Greyish yellow brown	240	16.2	14.4
15	Quartzite	Hard	30	Upper	Thick	14.3	376	0.96	0	10YR 8/1	Light grey	240	15.8	13.8
16	Fossiliferous sandstone	Soft	31	Upper	Thin	6.9	588	0.94	0	2.5Y 7/6	Yellowish brown	240	17.3	15.2
17	Fossiliferous sandstone	Soft	33	Upper	Intermediate	8.6	672	0.85	0	2.5Y 6/4	Dull yellow	240	16.4	14.3
18	Fossiliferous sandstone	Soft	36	Upper	Thin	7.5	732	0.86	0	2.5Y 7/4	Light yellow	240	16.5	14.2
1	Purple siltstone	Hard	2	Upper	Thick	14.3	484	0.97	0	7.5YR 5/1	Brownish grey	300	19.3	17.4
2	Purple siltstone	Hard	3	Upper	Intermediate	11.6	424	0.91	0	10R 5/1	Reddish grey	300	18.3	16.7
3	Purple siltstone	Hard	4	Upper	Thin	6.4	608	0.94	0	10R 6/1	Reddish grey	300	15.6	15.5
4	Grey siltstone	Hard	7	Upper	Thick	12.3	436	0.94	0	N 7/0	Greyish white	300	18.2	16.3
5	Grey siltstone	Hard	9	Upper	Thick	12.6	624	0.92	0	2.5GY 7/1	Light olive grey	300	17.8	16.1
6	Grey siltstone	Hard	12	Upper	Thin	7.5	580	0.95	0	N 6/0	Grey	300	18.7	16.4
7	White fossiliferous limestone	Soft	15	Upper	Thin	5.9	612	0.82	1	2.5Y 8/1	Light grey	300	15.6	13.7
8	White fossiliferous limestone	Soft	16	Upper	Thick	12.3	460	0.94	1	2.5Y 8/1	Light grey	300	14.6	13
9	Orange fossiliferous limestone	Soft	20	Upper	Thick	11.7	356	0.92	0	10YR 8/3	Light yellow	300	15.4	13.5
10	Orange fossiliferous limestone	Soft	21	Upper	Thick	12.4	676	0.88	1	2.5Y 8/4	Pale yellow	300	15.8	14.3
11	Orange fossiliferous limestone	Soft	22	Upper	Intermediate	7.6	632	0.94	0	2.5Y 7/4	Light yellow	300	16.9	14.6
12	Orange fossiliferous limestone	Soft	23	Upper	Thin	6.1	808	0.91	0	5Y 8/3	Pale yellow	300	17.3	14.8
13	Quartzite	Hard	25	Upper	Thin	9.6	636	0.87	0	10YR 6/2	Greyish yellow brown	300	16.6	14.7
14	Quartzite	Hard	29	Upper	Thick	14.1	400	0.94	1	10YR 7/2	Greyish yellow brown	300	15.7	14.3
15	Quartzite	Hard	30	Upper	Thick	14.3	376	0.96	0	10YR 8/1	Light grey	300	15.1	13.6
16	Fossiliferous sandstone	Soft	31	Upper	Thin	6.9	588	0.94	0	2.5Y 7/6	Yellowish brown	300	16.9	14.8
17	Fossiliferous sandstone	Soft	33	Upper	Intermediate	8.6	672	0.85	0	2.5Y 6/4	Dull yellow	300	15.9	14.1
18	Fossiliferous sandstone	Soft	36	Upper	Thin	7.5	732	0.86	0	2.5Y 7/4	Light yellow	300	16.2	14.2

## Sheet: Calibration trial 2
Hardness	Surface	Rock type	Tag number	Thickness category	Actual thickness (cm)	Surface area (cm²)	Rugosity	Microhabitats >13 mm	Colour code	Descriptive colour		Time	TIC Temp	Laser Temp
Hard	Upper	Purple siltstone	3	Intermediate	11.6	354	0.91	0	10R 5/1	Reddish grey		90	13.9	12.3
Soft	Upper	Orange fossiliferous limestone	21	Thick	12.4	608	0.91	0	2.5Y 8/4	Pale yellow		90	12.5	10.5
Hard	Upper	Quartzite	25	Thin	9.6	584	0.92	0	10YR 6/2	Greyish yellow brown		90	12.4	10.4
Soft	Upper	Fossiliferous sandstone	33	Intermediate	8.6	680	0.91	0	2.5Y 6/4	Dull yellow		90	12.5	9.1
Hard	Upper	Grey siltstone	12	Thin	7.5	576	0.94	0	N 6/0	Grey		90	13.7	10.6
Soft	Upper	Orange fossiliferous limestone	20	Thick	11.7	420	0.97	0	10YR 8/3	Light yellow		90	12.5	8.9
Hard	Upper	Quartzite	29	Thick	14.1	368	0.94	0	10YR 7/2	Greyish yellow brown		90	11.9	8.9
Soft	Upper	White fossiliferous limestone	16	Thick	12.3	412	0.94	0	2.5Y 8/1	Light grey		90	11.8	8.9
Hard	Upper	Grey siltstone	9	Thick	12.6	532	0.97	0	2.5GY 7/1	Light olive grey		90	13	9.8
Hard	Upper	Quartzite	30	Thick	14.3	588	0.9	0	10YR 8/1	Light grey		90	11.6	8.3
Hard	Upper	Purple siltstone	4	Thin	6.4	608	0.95	0	10R 6/1	Reddish grey		90	12.8	10.4
Soft	Upper	Fossiliferous sandstone	36	Thin	7.5	742	0.88	1	2.5Y 7/4	Light yellow		90	13	9.5
Soft	Upper	Fossiliferous sandstone	31	Thin	6.9	580	0.94	0	2.5Y 7/6	Yellowish brown		90	13.2	10.3
Soft	Upper	White fossiliferous limestone	15	Thin	5.9	564	0.92	2	2.5Y 8/1	Light grey		90	12.6	10
Soft	Upper	Orange fossiliferous limestone	22	Intermediate	7.6	584	0.94	0	2.5Y 7/4	Light yellow		90	12.8	10.2
Hard	Upper	Grey siltstone	7	Thick	12.3	544	0.95	0	N 7/0	Greyish white		90	13.8	11.5
Soft	Upper	Orange fossiliferous limestone	23	Thin	6.1	792	0.94	0	5Y 8/3	Pale yellow		90	12.8	10.5
Hard	Upper	Purple siltstone	2	Thick	14.3	456	0.94	0	7.5YR 5/1	Brownish grey		90	14	11.4
Soft	Upper	White fossiliferous limestone	13	Intermediate	9.4	492	0.91	2	2.5Y 8/1	Light grey		90	12.2	9.7
Hard	Upper	Grey siltstone	11	Thin	7.3	696	0.92	0	N 7/0	Greyish white		90	14	11.3
Hard	Upper	Purple siltstone	1	Intermediate	11.2	408	0.94	0	2.5YR 5/1	Reddish grey		90	14.1	10.6
Hard	Upper	Grey siltstone	10	Intermediate	8.4	556	0.94	0	2.5GY 7/1	Light olive grey		90	13.6	10.4
Soft	Upper	Orange fossiliferous limestone	19	Intermediate	6.8	528	0.92	0	2.5Y 6/4	Dull yellow		90	13	9.9
Soft	Upper	White fossiliferous limestone	14	Thin	6.5	816	0.95	2	2.5Y 8/1	Light grey		90	13	10.3
Soft	Upper	Fossiliferous sandstone	35	Thick	15	664	0.91	1	2.5Y 5/6	Yellowish brown		90	14	11.2
Hard	Upper	Purple siltstone	5	Thin	6.5	496	0.97	0	10R 6/1	Reddish grey		90	14.1	12.2
Hard	Upper	Quartzite	28	Intermediate	12.6	464	0.92	0	10YR 8/1	Light grey		90	12.6	10.7
Soft	Upper	Orange fossiliferous limestone	24	Thin	6	588	0.94	1	2.5Y 7/4	Light yellow		90	13.1	11.1
Hard	Upper	Quartzite	27	Intermediate	11.1	448	0.94	0	10YR 8/1	Light grey		90	12.3	10.7
Soft	Upper	White fossiliferous limestone	18	Thick	12	504	0.81	0	2.5Y 8/1	Light grey		90	13.1	11
Soft	Upper	Fossiliferous sandstone	34	Thick	13.9	520	0.95	0	2.5Y 7/4	Light yellow		90	13.1	11.1
Hard	Upper	Purple siltstone	6	Thick	13.5	516	1	0	7.5R 5/1	Reddish grey		90	14.6	12.4
Hard	Upper	Quartzite	26	Thin	7.9	496	0.94	0	10YR 7/2	Greyish yellow brown		90	12.6	10.9
Soft	Upper	White fossiliferous limestone	17	Intermediate	9.5	448	0.92	1	2.5Y 8/1	Light grey		90	12.6	11.1
Hard	Upper	Grey siltstone	8	Intermediate	8.1	584	0.97	0	2.5GY 6/1	Olive grey		90	14.2	12.5
Soft	Upper	Fossiliferous sandstone	32	Intermediate	7.9	536	0.91	0	2.5Y 7/4	Light yellow		90	13.9	12.3
Hard	Upper	Purple siltstone	3	Intermediate	11.6	354	0.91	0	10R 5/1	Reddish grey		150	16.6	14.1
Soft	Upper	Orange fossiliferous limestone	21	Thick	12.4	608	0.91	0	2.5Y 8/4	Pale yellow		150	14.3	11.7
Hard	Upper	Quartzite	25	Thin	9.6	584	0.92	0	10YR 6/2	Greyish yellow brown		150	14.5	12.6
Soft	Upper	Fossiliferous sandstone	33	Intermediate	8.6	680	0.91	0	2.5Y 6/4	Dull yellow		150	14.3	10.7
Hard	Upper	Grey siltstone	12	Thin	7.5	576	0.94	0	N 6/0	Grey		150	16.5	12.7
Soft	Upper	Orange fossiliferous limestone	20	Thick	11.7	420	0.97	0	10YR 8/3	Light yellow		150	14.4	10.6
Hard	Upper	Quartzite	29	Thick	14.1	368	0.94	0	10YR 7/2	Greyish yellow brown		150	14.3	11
Soft	Upper	White fossiliferous limestone	16	Thick	12.3	412	0.94	0	2.5Y 8/1	Light grey		150	14.4	10.5
Hard	Upper	Grey siltstone	9	Thick	12.6	532	0.97	0	2.5GY 7/1	Light olive grey		150	16.4	11.6
Hard	Upper	Quartzite	30	Thick	14.3	588	0.9	0	10YR 8/1	Light grey		150	14	9.4
Hard	Upper	Purple siltstone	4	Thin	6.4	608	0.95	0	10R 6/1	Reddish grey		150	15.5	11.2
Soft	Upper	Fossiliferous sandstone	36	Thin	7.5	742	0.88	1	2.5Y 7/4	Light yellow		150	14.5	10.4
Soft	Upper	Fossiliferous sandstone	31	Thin	6.9	580	0.94	0	2.5Y 7/6	Yellowish brown		150	15.3	11.4
Soft	Upper	White fossiliferous limestone	15	Thin	5.9	564	0.92	2	2.5Y 8/1	Light grey		150	14.3	10.9
Soft	Upper	Orange fossiliferous limestone	22	Intermediate	7.6	584	0.94	0	2.5Y 7/4	Light yellow		150	15.6	11.6
Hard	Upper	Grey siltstone	7	Thick	12.3	544	0.95	0	N 7/0	Greyish white		150	16.2	12.7
Soft	Upper	Orange fossiliferous limestone	23	Thin	6.1	792	0.94	0	5Y 8/3	Pale yellow		150	15.3	11.2
Hard	Upper	Purple siltstone	2	Thick	14.3	456	0.94	0	7.5YR 5/1	Brownish grey		150	16.6	13.1
Soft	Upper	White fossiliferous limestone	13	Intermediate	9.4	492	0.91	2	2.5Y 8/1	Light grey		150	14.6	10.5
Hard	Upper	Grey siltstone	11	Thin	7.3	696	0.92	0	N 7/0	Greyish white		150	17.2	13.7
Hard	Upper	Purple siltstone	1	Intermediate	11.2	408	0.94	0	2.5YR 5/1	Reddish grey		150	17.6	13.7
Hard	Upper	Grey siltstone	10	Intermediate	8.4	556	0.94	0	2.5GY 7/1	Light olive grey		150	16.7	13.3
Soft	Upper	Orange fossiliferous limestone	19	Intermediate	6.8	528	0.92	0	2.5Y 6/4	Dull yellow		150	15.8	12.6
Soft	Upper	White fossiliferous limestone	14	Thin	6.5	816	0.95	2	2.5Y 8/1	Light grey		150	14.8	11.9
Soft	Upper	Fossiliferous sandstone	35	Thick	15	664	0.91	1	2.5Y 5/6	Yellowish brown		150	16.2	13.5
Hard	Upper	Purple siltstone	5	Thin	6.5	496	0.97	0	10R 6/1	Reddish grey		150	17.4	14.3
Hard	Upper	Quartzite	28	Intermediate	12.6	464	0.92	0	10YR 8/1	Light grey		150	14.5	11.4
Soft	Upper	Orange fossiliferous limestone	24	Thin	6	588	0.94	1	2.5Y 7/4	Light yellow		150	15.5	12
Hard	Upper	Quartzite	27	Intermediate	11.1	448	0.94	0	10YR 8/1	Light grey		150	14.5	10.8
Soft	Upper	White fossiliferous limestone	18	Thick	12	504	0.81	0	2.5Y 8/1	Light grey		150	14.5	10.8
Soft	Upper	Fossiliferous sandstone	34	Thick	13.9	520	0.95	0	2.5Y 7/4	Light yellow		150	15	11.5
Hard	Upper	Purple siltstone	6	Thick	13.5	516	1	0	7.5R 5/1	Reddish grey		150	17.8	13.8
Hard	Upper	Quartzite	26	Thin	7.9	496	0.94	0	10YR 7/2	Greyish yellow brown		150	14.7	12
Soft	Upper	White fossiliferous limestone	17	Intermediate	9.5	448	0.92	1	2.5Y 8/1	Light grey		150	14.9	12
Hard	Upper	Grey siltstone	8	Intermediate	8.1	584	0.97	0	2.5GY 6/1	Olive grey		150	17.2	14.3
Soft	Upper	Fossiliferous sandstone	32	Intermediate	7.9	536	0.91	0	2.5Y 7/4	Light yellow		150	16.2	13.5
Hard	Upper	Purple siltstone	3	Intermediate	11.6	354	0.91	0	10R 5/1	Reddish grey		210	19.2	15.7
Soft	Upper	Orange fossiliferous limestone	21	Thick	12.4	608	0.91	0	2.5Y 8/4	Pale yellow		210	16.3	12
Hard	Upper	Quartzite	25	Thin	9.6	584	0.92	0	10YR 6/2	Greyish yellow brown		210	16.5	12.1
Soft	Upper	Fossiliferous sandstone	33	Intermediate	8.6	680	0.91	0	2.5Y 6/4	Dull yellow		210	16.3	11.5
Hard	Upper	Grey siltstone	12	Thin	7.5	576	0.94	0	N 6/0	Grey		210	19.5	14.9
Soft	Upper	Orange fossiliferous limestone	20	Thick	11.7	420	0.97	0	10YR 8/3	Light yellow		210	16.7	12.4
Hard	Upper	Quartzite	29	Thick	14.1	368	0.94	0	10YR 7/2	Greyish yellow brown		210	16.7	13.3
Soft	Upper	White fossiliferous limestone	16	Thick	12.3	412	0.94	0	2.5Y 8/1	Light grey		210	16.8	12.7
Hard	Upper	Grey siltstone	9	Thick	12.6	532	0.97	0	2.5GY 7/1	Light olive grey		210	19.1	15.1
Hard	Upper	Quartzite	30	Thick	14.3	588	0.9	0	10YR 8/1	Light grey		210	16	11.4
Hard	Upper	Purple siltstone	4	Thin	6.4	608	0.95	0	10R 6/1	Reddish grey		210	18.1	14.4
Soft	Upper	Fossiliferous sandstone	36	Thin	7.5	742	0.88	1	2.5Y 7/4	Light yellow		210	18	13.5
Soft	Upper	Fossiliferous sandstone	31	Thin	6.9	580	0.94	0	2.5Y 7/6	Yellowish brown		210	18.7	13.5
Soft	Upper	White fossiliferous limestone	15	Thin	5.9	564	0.92	2	2.5Y 8/1	Light grey		210	16.9	12.9
Soft	Upper	Orange fossiliferous limestone	22	Intermediate	7.6	584	0.94	0	2.5Y 7/4	Light yellow		210	18.5	14.1
Hard	Upper	Grey siltstone	7	Thick	12.3	544	0.95	0	N 7/0	Greyish white		210	19.1	15.5
Soft	Upper	Orange fossiliferous limestone	23	Thin	6.1	792	0.94	0	5Y 8/3	Pale yellow		210	18.1	13.4
Hard	Upper	Purple siltstone	2	Thick	14.3	456	0.94	0	7.5YR 5/1	Brownish grey		210	20.2	16
Soft	Upper	White fossiliferous limestone	13	Intermediate	9.4	492	0.91	2	2.5Y 8/1	Light grey		210	17	13
Hard	Upper	Grey siltstone	11	Thin	7.3	696	0.92	0	N 7/0	Greyish white		210	20.3	15.2
Hard	Upper	Purple siltstone	1	Intermediate	11.2	408	0.94	0	2.5YR 5/1	Reddish grey		210	20.6	15.8
Hard	Upper	Grey siltstone	10	Intermediate	8.4	556	0.94	0	2.5GY 7/1	Light olive grey		210	19.4	15.7
Soft	Upper	Orange fossiliferous limestone	19	Intermediate	6.8	528	0.92	0	2.5Y 6/4	Dull yellow		210	18	15.1
Soft	Upper	White fossiliferous limestone	14	Thin	6.5	816	0.95	2	2.5Y 8/1	Light grey		210	17.4	13.5
Soft	Upper	Fossiliferous sandstone	35	Thick	15	664	0.91	1	2.5Y 5/6	Yellowish brown		210	19	15.1
Hard	Upper	Purple siltstone	5	Thin	6.5	496	0.97	0	10R 6/1	Reddish grey		210	19.7	16.3
Hard	Upper	Quartzite	28	Intermediate	12.6	464	0.92	0	10YR 8/1	Light grey		210	16.2	12.7
Soft	Upper	Orange fossiliferous limestone	24	Thin	6	588	0.94	1	2.5Y 7/4	Light yellow		210	17.2	13.2
Hard	Upper	Quartzite	27	Intermediate	11.1	448	0.94	0	10YR 8/1	Light grey		210	16.2	11.9
Soft	Upper	White fossiliferous limestone	18	Thick	12	504	0.81	0	2.5Y 8/1	Light grey		210	16.1	11.3
Soft	Upper	Fossiliferous sandstone	34	Thick	13.9	520	0.95	0	2.5Y 7/4	Light yellow		210	17.7	12.4
Hard	Upper	Purple siltstone	6	Thick	13.5	516	1	0	7.5R 5/1	Reddish grey		210	20.5	15.9
Hard	Upper	Quartzite	26	Thin	7.9	496	0.94	0	10YR 7/2	Greyish yellow brown		210	17.1	13.5
Soft	Upper	White fossiliferous limestone	17	Intermediate	9.5	448	0.92	1	2.5Y 8/1	Light grey		210	16.6	12.7
Hard	Upper	Grey siltstone	8	Intermediate	8.1	584	0.97	0	2.5GY 6/1	Olive grey		210	19.1	15.6
Soft	Upper	Fossiliferous sandstone	32	Intermediate	7.9	536	0.91	0	2.5Y 7/4	Light yellow		210	18	14.1
Hard	Upper	Purple siltstone	3	Intermediate	11.6	354	0.91	0	10R 5/1	Reddish grey		270	21.7	19.3
Soft	Upper	Orange fossiliferous limestone	21	Thick	12.4	608	0.91	0	2.5Y 8/4	Pale yellow		270	18.2	15.7
Hard	Upper	Quartzite	25	Thin	9.6	584	0.92	0	10YR 6/2	Greyish yellow brown		270	19	16.8
Soft	Upper	Fossiliferous sandstone	33	Intermediate	8.6	680	0.91	0	2.5Y 6/4	Dull yellow		270	19.2	14.5
Hard	Upper	Grey siltstone	12	Thin	7.5	576	0.94	0	N 6/0	Grey		270	22.3	17.3
Soft	Upper	Orange fossiliferous limestone	20	Thick	11.7	420	0.97	0	10YR 8/3	Light yellow		270	19.3	13.9
Hard	Upper	Quartzite	29	Thick	14.1	368	0.94	0	10YR 7/2	Greyish yellow brown		270	18.7	14.4
Soft	Upper	White fossiliferous limestone	16	Thick	12.3	412	0.94	0	2.5Y 8/1	Light grey		270	19.2	14
Hard	Upper	Grey siltstone	9	Thick	12.6	532	0.97	0	2.5GY 7/1	Light olive grey		270	21.8	17.3
Hard	Upper	Quartzite	30	Thick	14.3	588	0.9	0	10YR 8/1	Light grey		270	17.7	13.4
Hard	Upper	Purple siltstone	4	Thin	6.4	608	0.95	0	10R 6/1	Reddish grey		270	21.2	16.4
Soft	Upper	Fossiliferous sandstone	36	Thin	7.5	742	0.88	1	2.5Y 7/4	Light yellow		270	20.2	14.6
Soft	Upper	Fossiliferous sandstone	31	Thin	6.9	580	0.94	0	2.5Y 7/6	Yellowish brown		270	20.7	15.1
Soft	Upper	White fossiliferous limestone	15	Thin	5.9	564	0.92	2	2.5Y 8/1	Light grey		270	18.8	13.1
Soft	Upper	Orange fossiliferous limestone	22	Intermediate	7.6	584	0.94	0	2.5Y 7/4	Light yellow		270	21	16.6
Hard	Upper	Grey siltstone	7	Thick	12.3	544	0.95	0	N 7/0	Greyish white		270	21.7	16.7
Soft	Upper	Orange fossiliferous limestone	23	Thin	6.1	792	0.94	0	5Y 8/3	Pale yellow		270	20.6	16.1
Hard	Upper	Purple siltstone	2	Thick	14.3	456	0.94	0	7.5YR 5/1	Brownish grey		270	23.3	18.7
Soft	Upper	White fossiliferous limestone	13	Intermediate	9.4	492	0.91	2	2.5Y 8/1	Light grey		270	18.9	14.3
Hard	Upper	Grey siltstone	11	Thin	7.3	696	0.92	0	N 7/0	Greyish white		270	23.6	18.3
Hard	Upper	Purple siltstone	1	Intermediate	11.2	408	0.94	0	2.5YR 5/1	Reddish grey		270	23.8	18
Hard	Upper	Grey siltstone	10	Intermediate	8.4	556	0.94	0	2.5GY 7/1	Light olive grey		270	22.3	17.6
Soft	Upper	Orange fossiliferous limestone	19	Intermediate	6.8	528	0.92	0	2.5Y 6/4	Dull yellow		270	20.8	15.2
Soft	Upper	White fossiliferous limestone	14	Thin	6.5	816	0.95	2	2.5Y 8/1	Light grey		270	19.7	15
Soft	Upper	Fossiliferous sandstone	35	Thick	15	664	0.91	1	2.5Y 5/6	Yellowish brown		270	22.5	17.7
Hard	Upper	Purple siltstone	5	Thin	6.5	496	0.97	0	10R 6/1	Reddish grey		270	23.3	18.6
Hard	Upper	Quartzite	28	Intermediate	12.6	464	0.92	0	10YR 8/1	Light grey		270	18.1	13.3
Soft	Upper	Orange fossiliferous limestone	24	Thin	6	588	0.94	1	2.5Y 7/4	Light yellow		270	19.5	13.9
Hard	Upper	Quartzite	27	Intermediate	11.1	448	0.94	0	10YR 8/1	Light grey		270	18.1	12.4
Soft	Upper	White fossiliferous limestone	18	Thick	12	504	0.81	0	2.5Y 8/1	Light grey		270	19.3	12.3
Soft	Upper	Fossiliferous sandstone	34	Thick	13.9	520	0.95	0	2.5Y 7/4	Light yellow		270	20.9	14.1
Hard	Upper	Purple siltstone	6	Thick	13.5	516	1	0	7.5R 5/1	Reddish grey		270	23	16.9
Hard	Upper	Quartzite	26	Thin	7.9	496	0.94	0	10YR 7/2	Greyish yellow brown		270	18.9	13.4
Soft	Upper	White fossiliferous limestone	17	Intermediate	9.5	448	0.92	1	2.5Y 8/1	Light grey		270	17.5	12
Hard	Upper	Grey siltstone	8	Intermediate	8.1	584	0.97	0	2.5GY 6/1	Olive grey		270	21.2	16.3
Soft	Upper	Fossiliferous sandstone	32	Intermediate	7.9	536	0.91	0	2.5Y 7/4	Light yellow		270	20.1	14.9
Hard	Upper	Purple siltstone	3	Intermediate	11.6	354	0.91	0	10R 5/1	Reddish grey		330	23.2	20.7
Soft	Upper	Orange fossiliferous limestone	21	Thick	12.4	608	0.91	0	2.5Y 8/4	Pale yellow		330	17.9	16.1
Hard	Upper	Quartzite	25	Thin	9.6	584	0.92	0	10YR 6/2	Greyish yellow brown		330	19.3	17
Soft	Upper	Fossiliferous sandstone	33	Intermediate	8.6	680	0.91	0	2.5Y 6/4	Dull yellow		330	18.4	14.4
Hard	Upper	Grey siltstone	12	Thin	7.5	576	0.94	0	N 6/0	Grey		330	21.9	17.1
Soft	Upper	Orange fossiliferous limestone	20	Thick	11.7	420	0.97	0	10YR 8/3	Light yellow		330	18.1	13.4
Hard	Upper	Quartzite	29	Thick	14.1	368	0.94	0	10YR 7/2	Greyish yellow brown		330	18.2	14.8
Soft	Upper	White fossiliferous limestone	16	Thick	12.3	412	0.94	0	2.5Y 8/1	Light grey		330	17.6	13.3
Hard	Upper	Grey siltstone	9	Thick	12.6	532	0.97	0	2.5GY 7/1	Light olive grey		330	22	17.7
Hard	Upper	Quartzite	30	Thick	14.3	588	0.9	0	10YR 8/1	Light grey		330	17.3	13.9
Hard	Upper	Purple siltstone	4	Thin	6.4	608	0.95	0	10R 6/1	Reddish grey		330	21.1	17.5
Soft	Upper	Fossiliferous sandstone	36	Thin	7.5	742	0.88	1	2.5Y 7/4	Light yellow		330	20.2	16
Soft	Upper	Fossiliferous sandstone	31	Thin	6.9	580	0.94	0	2.5Y 7/6	Yellowish brown		330	20.7	15.4
Soft	Upper	White fossiliferous limestone	15	Thin	5.9	564	0.92	2	2.5Y 8/1	Light grey		330	18.6	14.4
Soft	Upper	Orange fossiliferous limestone	22	Intermediate	7.6	584	0.94	0	2.5Y 7/4	Light yellow		330	20.7	16.4
Hard	Upper	Grey siltstone	7	Thick	12.3	544	0.95	0	N 7/0	Greyish white		330	21.7	18.6
Soft	Upper	Orange fossiliferous limestone	23	Thin	6.1	792	0.94	0	5Y 8/3	Pale yellow		330	20.1	16.4
Hard	Upper	Purple siltstone	2	Thick	14.3	456	0.94	0	7.5YR 5/1	Brownish grey		330	23.1	19.5
Soft	Upper	White fossiliferous limestone	13	Intermediate	9.4	492	0.91	2	2.5Y 8/1	Light grey		330	18.6	14.4
Hard	Upper	Grey siltstone	11	Thin	7.3	696	0.92	0	N 7/0	Greyish white		330	23.3	18.8
Hard	Upper	Purple siltstone	1	Intermediate	11.2	408	0.94	0	2.5YR 5/1	Reddish grey		330	23.9	20
Hard	Upper	Grey siltstone	10	Intermediate	8.4	556	0.94	0	2.5GY 7/1	Light olive grey		330	22.9	18.9
Soft	Upper	Orange fossiliferous limestone	19	Intermediate	6.8	528	0.92	0	2.5Y 6/4	Dull yellow		330	20.9	17
Soft	Upper	White fossiliferous limestone	14	Thin	6.5	816	0.95	2	2.5Y 8/1	Light grey		330	19.4	16.2
Soft	Upper	Fossiliferous sandstone	35	Thick	15	664	0.91	1	2.5Y 5/6	Yellowish brown		330	23	19.4
Hard	Upper	Purple siltstone	5	Thin	6.5	496	0.97	0	10R 6/1	Reddish grey		330	22.4	20.1
Hard	Upper	Quartzite	28	Intermediate	12.6	464	0.92	0	10YR 8/1	Light grey		330	18.4	15.7
Soft	Upper	Orange fossiliferous limestone	24	Thin	6	588	0.94	1	2.5Y 7/4	Light yellow		330	20	16.9
Hard	Upper	Quartzite	27	Intermediate	11.1	448	0.94	0	10YR 8/1	Light grey		330	18.5	14.9
Soft	Upper	White fossiliferous limestone	18	Thick	12	504	0.81	0	2.5Y 8/1	Light grey		330	16.7	12.2
Soft	Upper	Fossiliferous sandstone	34	Thick	13.9	520	0.95	0	2.5Y 7/4	Light yellow		330	19.7	15.4
Hard	Upper	Purple siltstone	6	Thick	13.5	516	1	0	7.5R 5/1	Reddish grey		330	23.9	20
Hard	Upper	Quartzite	26	Thin	7.9	496	0.94	0	10YR 7/2	Greyish yellow brown		330	20.1	17
Soft	Upper	White fossiliferous limestone	17	Intermediate	9.5	448	0.92	1	2.5Y 8/1	Light grey		330	18.7	15.1
Hard	Upper	Grey siltstone	8	Intermediate	8.1	584	0.97	0	2.5GY 6/1	Olive grey		330	22.7	18.6
Soft	Upper	Fossiliferous sandstone	32	Intermediate	7.9	536	0.91	0	2.5Y 7/4	Light yellow		330	20.8	16.8

## Sheet: Lower pilot study 1
Surface	Exposure time	Hardness	Rock type	Tag number	Thickness category	Actual thickness (cm)	Surface area (cm²)	Rugosity	Microhabitats >13 mm	Colour code	Descriptive colour		Max temp	Min temp	Range	Target temp
Lower	30	Hard	Purple siltstone	3	Intermediate	11.6	354	0.91	0	10R 5/1	Reddish grey		15	9.5	5.5	12.2
Lower	30	Soft	Orange fossiliferous limestone	21	Thick	12.4	608	0.91	0	2.5Y 8/4	Pale yellow		14.6	9.9	4.7	12.3
Lower	30	Hard	Quartzite	25	Thin	9.6	584	0.92	0	10YR 6/2	Greyish yellow brown		12.3	8.1	4.2	10.6
Lower	30	Soft	Fossiliferous sandstone	33	Intermediate	8.6	680	0.91	0	2.5Y 6/4	Dull yellow		14.8	9.2	5.6	10.7
Lower	30	Hard	Grey siltstone	12	Thin	7.5	576	0.94	0	N 6/0	Grey		15.2	10.5	4.7	11.3
Lower	30	Soft	Orange fossiliferous limestone	20	Thick	11.7	420	0.97	0	10YR 8/3	Light yellow		15	10.1	4.9	12.3
Lower	30	Hard	Quartzite	29	Thick	14.1	368	0.94	0	10YR 7/2	Greyish yellow brown		12.5	8.1	4.4	10.4
Lower	30	Soft	White fossiliferous limestone	16	Thick	12.3	412	0.94	0	2.5Y 8/1	Light grey		13.6	9.7	3.9	10.7
Lower	30	Hard	Grey siltstone	9	Thick	12.6	532	0.97	0	2.5GY 7/1	Light olive grey		14.9	9.4	5.5	11.6
Lower	30	Hard	Quartzite	30	Thick	14.3	588	0.9	0	10YR 8/1	Light grey		11.9	7.3	4.6	9.3
Lower	30	Hard	Purple siltstone	4	Thin	6.4	608	0.95	0	10R 6/1	Reddish grey		12.8	8.4	4.4	10.1
Lower	30	Soft	Fossiliferous sandstone	36	Thin	7.5	742	0.88	1	2.5Y 7/4	Light yellow		15.2	9.7	5.5	12.5
Lower	30	Soft	Fossiliferous sandstone	31	Thin	6.9	580	0.94	0	2.5Y 7/6	Yellowish brown		14.7	10.2	4.5	12.3
Lower	30	Soft	White fossiliferous limestone	15	Thin	5.9	564	0.92	2	2.5Y 8/1	Light grey		15.5	10.3	5.2	12.6
Lower	30	Soft	Orange fossiliferous limestone	22	Intermediate	7.6	584	0.94	0	2.5Y 7/4	Light yellow		14.9	10.2	4.7	11.5
Lower	30	Hard	Grey siltstone	7	Thick	12.3	544	0.95	0	N 7/0	Greyish white		14.1	9.1	5	11.2
Lower	30	Soft	Orange fossiliferous limestone	23	Thin	6.1	792	0.94	0	5Y 8/3	Pale yellow		13.8	9.8	4	12.1
Lower	30	Hard	Purple siltstone	2	Thick	14.3	456	0.94	0	7.5YR 5/1	Brownish grey		15.3	9.3	6	11.1
Lower	30	Soft	White fossiliferous limestone	13	Intermediate	9.4	492	0.91	2	2.5Y 8/1	Light grey		14.1	9.2	4.9	10.7
Lower	30	Hard	Grey siltstone	11	Thin	7.3	696	0.92	0	N 7/0	Greyish white		14.4	8.8	5.6	12.3
Lower	30	Hard	Purple siltstone	1	Intermediate	11.2	408	0.94	0	2.5YR 5/1	Reddish grey		14.2	10.3	3.9	11.9
Lower	30	Hard	Grey siltstone	10	Intermediate	8.4	556	0.94	0	2.5GY 7/1	Light olive grey		14.5	9.5	5	12.6
Lower	30	Soft	Orange fossiliferous limestone	19	Intermediate	6.8	528	0.92	0	2.5Y 6/4	Dull yellow		13.6	9.4	4.2	11.3
Lower	30	Soft	White fossiliferous limestone	14	Thin	6.5	816	0.95	2	2.5Y 8/1	Light grey		13.6	9	4.6	9.6
Lower	30	Soft	Fossiliferous sandstone	35	Thick	15	664	0.91	1	2.5Y 5/6	Yellowish brown		14.9	10.3	4.6	12.6
Lower	30	Hard	Purple siltstone	5	Thin	6.5	496	0.97	0	10R 6/1	Reddish grey		13.7	9.4	4.3	12.7
Lower	30	Hard	Quartzite	28	Intermediate	12.6	464	0.92	0	10YR 8/1	Light grey		13.3	8.2	5.1	10.5
Lower	30	Soft	Orange fossiliferous limestone	24	Thin	6	588	0.94	1	2.5Y 7/4	Light yellow		13.2	9.5	3.7	10.4
Lower	30	Hard	Quartzite	27	Intermediate	11.1	448	0.94	0	10YR 8/1	Light grey		10.9	7.5	3.4	8.6
Lower	30	Soft	White fossiliferous limestone	18	Thick	12	504	0.81	0	2.5Y 8/1	Light grey		13.9	10.4	3.5	11.3
Lower	30	Soft	Fossiliferous sandstone	34	Thick	13.9	520	0.95	0	2.5Y 7/4	Light yellow		13.5	8.9	4.6	11.2
Lower	30	Hard	Purple siltstone	6	Thick	13.5	516	1	0	7.5R 5/1	Reddish grey		14.5	9.8	4.7	12.3
Lower	30	Hard	Quartzite	26	Thin	7.9	496	0.94	0	10YR 7/2	Greyish yellow brown		12.7	8.1	4.6	9.2
Lower	30	Soft	White fossiliferous limestone	17	Intermediate	9.5	448	0.92	1	2.5Y 8/1	Light grey		13	8.8	4.2	11.5
Lower	30	Hard	Grey siltstone	8	Intermediate	8.1	584	0.97	0	2.5GY 6/1	Olive grey		13.8	9	4.8	10.2
Lower	30	Soft	Fossiliferous sandstone	32	Intermediate	7.9	536	0.91	0	2.5Y 7/4	Light yellow		13.5	9.5	4	10.4
Lower	90	Hard	Purple siltstone	3	Intermediate	11.6	354	0.91	0	10R 5/1	Reddish grey		11.4	8.9	2.5	9.7
Lower	90	Soft	Orange fossiliferous limestone	21	Thick	12.4	608	0.91	0	2.5Y 8/4	Pale yellow		11.6	8.2	3.4	9.6
Lower	90	Hard	Quartzite	25	Thin	9.6	584	0.92	0	10YR 6/2	Greyish yellow brown		11.1	7.1	4	8.8
Lower	90	Soft	Fossiliferous sandstone	33	Intermediate	8.6	680	0.91	0	2.5Y 6/4	Dull yellow		12.6	9	3.6	10.3
Lower	90	Hard	Grey siltstone	12	Thin	7.5	576	0.94	0	N 6/0	Grey		12.8	8.8	4	9.9
Lower	90	Soft	Orange fossiliferous limestone	20	Thick	11.7	420	0.97	0	10YR 8/3	Light yellow		12.1	8.5	3.6	9.7
Lower	90	Hard	Quartzite	29	Thick	14.1	368	0.94	0	10YR 7/2	Greyish yellow brown		12.3	7.2	5.1	9.4
Lower	90	Soft	White fossiliferous limestone	16	Thick	12.3	412	0.94	0	2.5Y 8/1	Light grey		12.8	9.5	3.3	11.3
Lower	90	Hard	Grey siltstone	9	Thick	12.6	532	0.97	0	2.5GY 7/1	Light olive grey		14	10.3	3.7	11.3
Lower	90	Hard	Quartzite	30	Thick	14.3	588	0.9	0	10YR 8/1	Light grey		13.6	7.2	6.4	9.9
Lower	90	Hard	Purple siltstone	4	Thin	6.4	608	0.95	0	10R 6/1	Reddish grey		14.3	8.7	5.6	10.8
Lower	90	Soft	Fossiliferous sandstone	36	Thin	7.5	742	0.88	1	2.5Y 7/4	Light yellow		14.5	9.2	5.3	12.3
Lower	90	Soft	Fossiliferous sandstone	31	Thin	6.9	580	0.94	0	2.5Y 7/6	Yellowish brown		15.3	9.5	5.8	12
Lower	90	Soft	White fossiliferous limestone	15	Thin	5.9	564	0.92	2	2.5Y 8/1	Light grey		14.8	10.7	4.1	12.3
Lower	90	Soft	Orange fossiliferous limestone	22	Intermediate	7.6	584	0.94	0	2.5Y 7/4	Light yellow		13.5	10	3.5	12
Lower	90	Hard	Grey siltstone	7	Thick	12.3	544	0.95	0	N 7/0	Greyish white		13.9	9.5	4.4	12.1
Lower	90	Soft	Orange fossiliferous limestone	23	Thin	6.1	792	0.94	0	5Y 8/3	Pale yellow		14	10.7	3.3	11.9
Lower	90	Hard	Purple siltstone	2	Thick	14.3	456	0.94	0	7.5YR 5/1	Brownish grey		14.2	11.3	2.9	12.3
Lower	90	Soft	White fossiliferous limestone	13	Intermediate	9.4	492	0.91	2	2.5Y 8/1	Light grey		14.4	10.8	3.6	11.9
Lower	90	Hard	Grey siltstone	11	Thin	7.3	696	0.92	0	N 7/0	Greyish white		14.6	11.5	3.1	12.7
Lower	90	Hard	Purple siltstone	1	Intermediate	11.2	408	0.94	0	2.5YR 5/1	Reddish grey		15	11.9	3.1	12.7
Lower	90	Hard	Grey siltstone	10	Intermediate	8.4	556	0.94	0	2.5GY 7/1	Light olive grey		15.9	11.8	4.1	13
Lower	90	Soft	Orange fossiliferous limestone	19	Intermediate	6.8	528	0.92	0	2.5Y 6/4	Dull yellow		14.7	10.7	4	12
Lower	90	Soft	White fossiliferous limestone	14	Thin	6.5	816	0.95	2	2.5Y 8/1	Light grey		14.3	10.1	4.2	11.6
Lower	90	Soft	Fossiliferous sandstone	35	Thick	15	664	0.91	1	2.5Y 5/6	Yellowish brown		13.5	10.9	2.6	11.8
Lower	90	Hard	Purple siltstone	5	Thin	6.5	496	0.97	0	10R 6/1	Reddish grey		15	12.2	2.8	12.5
Lower	90	Hard	Quartzite	28	Intermediate	12.6	464	0.92	0	10YR 8/1	Light grey		13.6	10.8	2.8	11.9
Lower	90	Soft	Orange fossiliferous limestone	24	Thin	6	588	0.94	1	2.5Y 7/4	Light yellow		14	10.9	3.1	11.6
Lower	90	Hard	Quartzite	27	Intermediate	11.1	448	0.94	0	10YR 8/1	Light grey		13.1	10.7	2.4	11.7
Lower	90	Soft	White fossiliferous limestone	18	Thick	12	504	0.81	0	2.5Y 8/1	Light grey		12.8	10.6	2.2	12
Lower	90	Soft	Fossiliferous sandstone	34	Thick	13.9	520	0.95	0	2.5Y 7/4	Light yellow		13.3	10.7	2.6	12.1
Lower	90	Hard	Purple siltstone	6	Thick	13.5	516	1	0	7.5R 5/1	Reddish grey		14.5	11.9	2.6	12.9
Lower	90	Hard	Quartzite	26	Thin	7.9	496	0.94	0	10YR 7/2	Greyish yellow brown		14.6	11.5	3.1	13.3
Lower	90	Soft	White fossiliferous limestone	17	Intermediate	9.5	448	0.92	1	2.5Y 8/1	Light grey		13.3	10.6	2.7	12.1
Lower	90	Hard	Grey siltstone	8	Intermediate	8.1	584	0.97	0	2.5GY 6/1	Olive grey		14.5	11.6	2.9	13.1
Lower	90	Soft	Fossiliferous sandstone	32	Intermediate	7.9	536	0.91	0	2.5Y 7/4	Light yellow		14.6	11.6	3	13.1
Lower	150	Hard	Purple siltstone	3	Intermediate	11.6	354	0.91	0	10R 5/1	Reddish grey		16.8	14.1	2.7	15.1
Lower	150	Soft	Orange fossiliferous limestone	21	Thick	12.4	608	0.91	0	2.5Y 8/4	Pale yellow		15.2	12.1	3.1	14.1
Lower	150	Hard	Quartzite	25	Thin	9.6	584	0.92	0	10YR 6/2	Greyish yellow brown		15.1	12	3.1	13.5
Lower	150	Soft	Fossiliferous sandstone	33	Intermediate	8.6	680	0.91	0	2.5Y 6/4	Dull yellow		14.7	12.1	2.6	13.8
Lower	150	Hard	Grey siltstone	12	Thin	7.5	576	0.94	0	N 6/0	Grey		16.7	13.8	2.9	15.3
Lower	150	Soft	Orange fossiliferous limestone	20	Thick	11.7	420	0.97	0	10YR 8/3	Light yellow		15.2	11.3	3.9	13.8
Lower	150	Hard	Quartzite	29	Thick	14.1	368	0.94	0	10YR 7/2	Greyish yellow brown		13.6	11.3	2.3	12.5
Lower	150	Soft	White fossiliferous limestone	16	Thick	12.3	412	0.94	0	2.5Y 8/1	Light grey		14.1	10.8	3.3	12.5
Lower	150	Hard	Grey siltstone	9	Thick	12.6	532	0.97	0	2.5GY 7/1	Light olive grey		16	12.5	3.5	14.2
Lower	150	Hard	Quartzite	30	Thick	14.3	588	0.9	0	10YR 8/1	Light grey		13.6	10.2	3.4	12.3
Lower	150	Hard	Purple siltstone	4	Thin	6.4	608	0.95	0	10R 6/1	Reddish grey		15.2	11.7	3.5	13.6
Lower	150	Soft	Fossiliferous sandstone	36	Thin	7.5	742	0.88	1	2.5Y 7/4	Light yellow		15.2	10.9	4.3	13.6
Lower	150	Soft	Fossiliferous sandstone	31	Thin	6.9	580	0.94	0	2.5Y 7/6	Yellowish brown		15	11.8	3.2	13.8
Lower	150	Soft	White fossiliferous limestone	15	Thin	5.9	564	0.92	2	2.5Y 8/1	Light grey		14.3	10.8	3.5	13.3
Lower	150	Soft	Orange fossiliferous limestone	22	Intermediate	7.6	584	0.94	0	2.5Y 7/4	Light yellow		15.5	11.3	4.2	13.7
Lower	150	Hard	Grey siltstone	7	Thick	12.3	544	0.95	0	N 7/0	Greyish white		16.1	11.2	4.9	14.4
Lower	150	Soft	Orange fossiliferous limestone	23	Thin	6.1	792	0.94	0	5Y 8/3	Pale yellow		14.5	11.1	3.4	13
Lower	150	Hard	Purple siltstone	2	Thick	14.3	456	0.94	0	7.5YR 5/1	Brownish grey		16.7	12.8	3.9	14.5
Lower	150	Soft	White fossiliferous limestone	13	Intermediate	9.4	492	0.91	2	2.5Y 8/1	Light grey		13.3	10.2	3.1	11.7
Lower	150	Hard	Grey siltstone	11	Thin	7.3	696	0.92	0	N 7/0	Greyish white		15.7	12.4	3.3	14.4
Lower	150	Hard	Purple siltstone	1	Intermediate	11.2	408	0.94	0	2.5YR 5/1	Reddish grey		15.8	12.6	3.2	14.5
Lower	150	Hard	Grey siltstone	10	Intermediate	8.4	556	0.94	0	2.5GY 7/1	Light olive grey		15.7	11.9	3.8	14.6
Lower	150	Soft	Orange fossiliferous limestone	19	Intermediate	6.8	528	0.92	0	2.5Y 6/4	Dull yellow		15	11.3	3.7	13.2
Lower	150	Soft	White fossiliferous limestone	14	Thin	6.5	816	0.95	2	2.5Y 8/1	Light grey		14.8	10.3	4.5	12.2
Lower	150	Soft	Fossiliferous sandstone	35	Thick	15	664	0.91	1	2.5Y 5/6	Yellowish brown		15.8	10.6	5.2	13.2
Lower	150	Hard	Purple siltstone	5	Thin	6.5	496	0.97	0	10R 6/1	Reddish grey		15.2	12.1	3.1	14.1
Lower	150	Hard	Quartzite	28	Intermediate	12.6	464	0.92	0	10YR 8/1	Light grey		14.7	10.3	4.4	11.7
Lower	150	Soft	Orange fossiliferous limestone	24	Thin	6	588	0.94	1	2.5Y 7/4	Light yellow		14.6	10.3	4.3	12
Lower	150	Hard	Quartzite	27	Intermediate	11.1	448	0.94	0	10YR 8/1	Light grey		12.6	10.3	2.3	12.2
Lower	150	Soft	White fossiliferous limestone	18	Thick	12	504	0.81	0	2.5Y 8/1	Light grey		14.3	10.8	3.5	12.1
Lower	150	Soft	Fossiliferous sandstone	34	Thick	13.9	520	0.95	0	2.5Y 7/4	Light yellow		14.5	10.7	3.8	12.7
Lower	150	Hard	Purple siltstone	6	Thick	13.5	516	1	0	7.5R 5/1	Reddish grey		15.9	12.2	3.7	14.5
Lower	150	Hard	Quartzite	26	Thin	7.9	496	0.94	0	10YR 7/2	Greyish yellow brown		14.5	10.4	4.1	12.1
Lower	150	Soft	White fossiliferous limestone	17	Intermediate	9.5	448	0.92	1	2.5Y 8/1	Light grey		13.8	10.1	3.7	11.8
Lower	150	Hard	Grey siltstone	8	Intermediate	8.1	584	0.97	0	2.5GY 6/1	Olive grey		15.3	11.5	3.8	13.1
Lower	150	Soft	Fossiliferous sandstone	32	Intermediate	7.9	536	0.91	0	2.5Y 7/4	Light yellow		14.5	10.8	3.7	12.5
Lower	210	Hard	Purple siltstone	3	Intermediate	11.6	354	0.91	0	10R 5/1	Reddish grey		14.2	11.2	3	12.4
Lower	210	Soft	Orange fossiliferous limestone	21	Thick	12.4	608	0.91	0	2.5Y 8/4	Pale yellow		12.6	9.5	3.1	10.4
Lower	210	Hard	Quartzite	25	Thin	9.6	584	0.92	0	10YR 6/2	Greyish yellow brown		13.9	10.9	3	12.1
Lower	210	Soft	Fossiliferous sandstone	33	Intermediate	8.6	680	0.91	0	2.5Y 6/4	Dull yellow		13.6	11	2.6	12.9
Lower	210	Hard	Grey siltstone	12	Thin	7.5	576	0.94	0	N 6/0	Grey		16.1	12.7	3.4	13.9
Lower	210	Soft	Orange fossiliferous limestone	20	Thick	11.7	420	0.97	0	10YR 8/3	Light yellow		13.4	11.1	2.3	11.6
Lower	210	Hard	Quartzite	29	Thick	14.1	368	0.94	0	10YR 7/2	Greyish yellow brown		13.3	11.6	1.7	12.5
Lower	210	Soft	White fossiliferous limestone	16	Thick	12.3	412	0.94	0	2.5Y 8/1	Light grey		13.9	11.4	2.5	12.7
[truncated: 64 more rows]

## Sheet: Upper pilot study 1
Surface	Exposure time	Hardness	Rock type	Tag number	Thickness category	Actual thickness (cm)	Surface area (cm²)	Rugosity	Microhabitats >13 mm	Colour code	Descriptive colour		Max temp	Min temp	Range	Target temp
[truncated: 180 more rows]

[truncated: 8 more sheets: Upper Pilot study 2, Lower pilot study 2, November 19, Primer, Upper - lower, Change rates, Sheet1, Minima changes]
